# Supplementary material
Source: publisher figshare collection journal article supplement (https://gsajournals.figshare.com/articles/dataset/_/13281512)
Supplement: Supplementary file 1 [file 1]

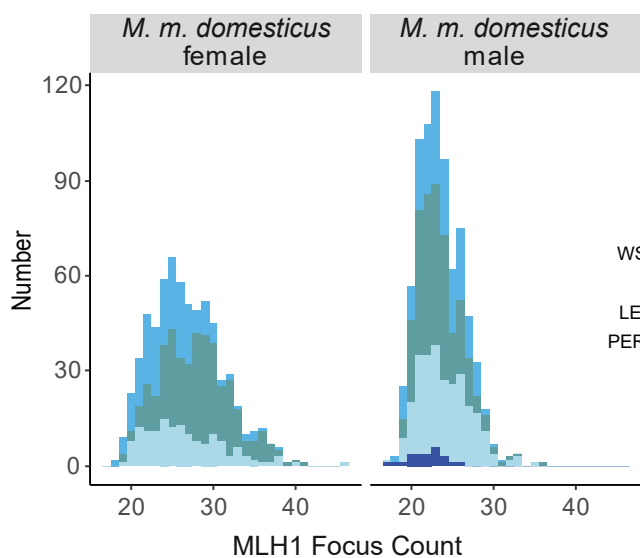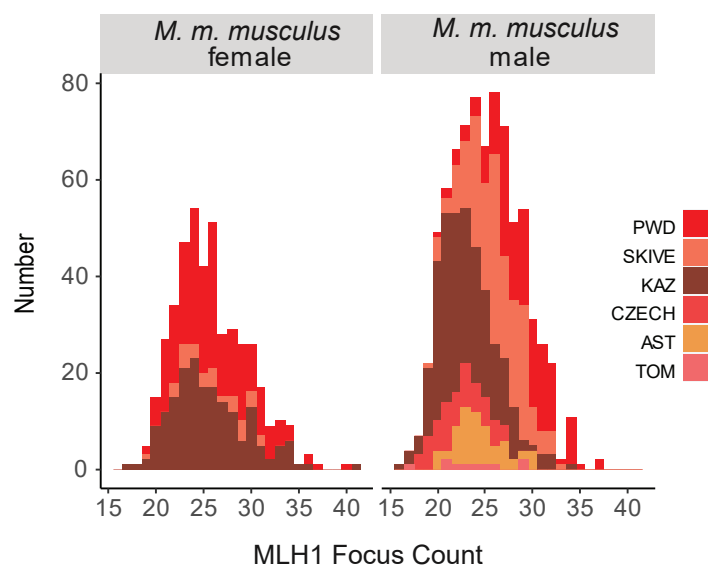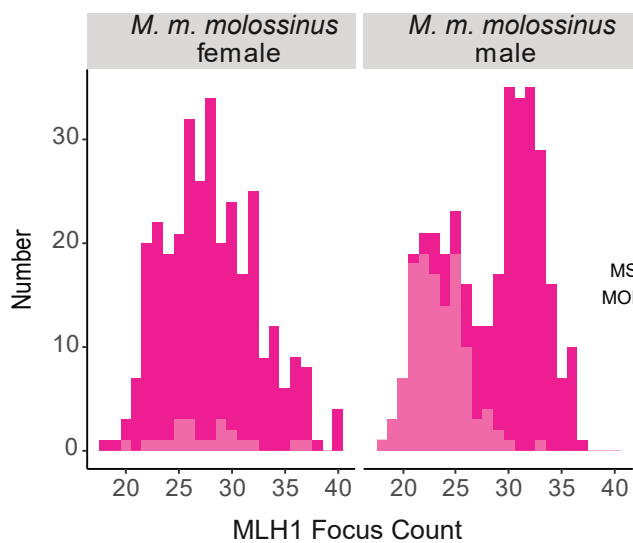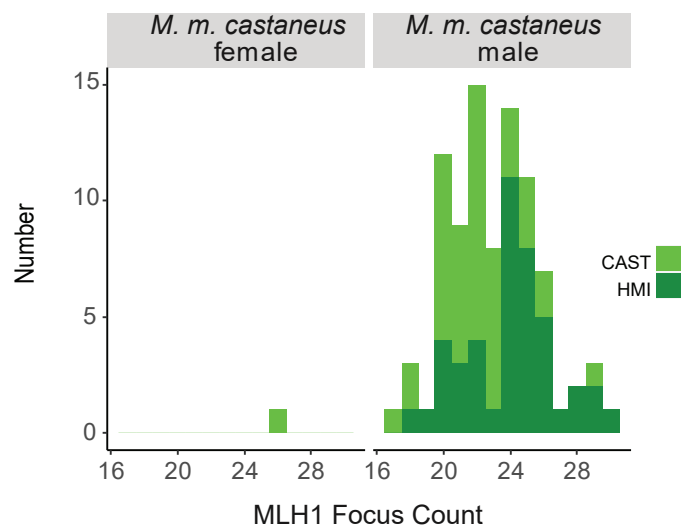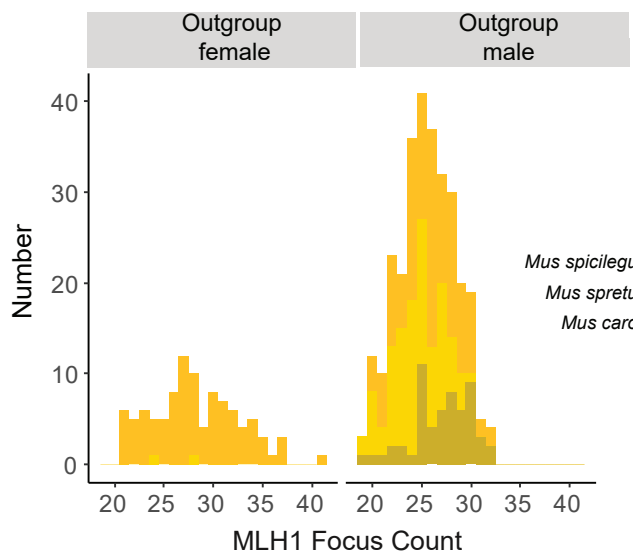

**Supplemental Figure 1. Distributions of MLH1 Focus Counts for Each Strain.** All cells surveyed in each strain are included. Panels are organized by subspecies/species. Strain names are abbreviated for space.
