# Supplementary material
Source: publisher figshare collection journal article supplement (https://gsajournals.figshare.com/articles/dataset/_/13281512)
Supplement: Supplementary file 1 [file 1]

## Sheet: Sheet1
fileName	chromosomeLength	centromere_ABS_Position	centromere_PER_Position	boxNumber	Obj.ID	SC.pass	foci.pass	curated.1pass.0fail	curation.notes	hand.foci.count	Foci1	Foci2	Foci3	Foci4	notes	mouse	category	strain	sex	subsp	species	IFD3_ABS	IFD1_ABS	IFD2_ABS	IFD1_PER	PER_Foci_1	PER_Foci_2	PER_Foci_3	PER_Foci_4	SisCoTen	Rec.group
12oct18_26sep18_CZECH_m1_sp1_11_rev	51	5.4769	0.10734	20	12oct18_26sep18_CZECH_m1_sp1_11_rev_20	1	0			0						26sep18_CZECH_m1	CZECH male	CZECH	male	Musc	M.musculus										0
23jul19_28sep18_CZECH_m2_sp1_10_rev	44	5.1147	0.11549	2	23jul19_28sep18_CZECH_m2_sp1_10_rev_2	1	0			0						28sep18_CZECH_m2	CZECH male	CZECH	male	Musc	M.musculus										0
23jul19_28sep18_CZECH_m2_sp1_13.1_rev	62	6.0741	0.09853	7	23jul19_28sep18_CZECH_m2_sp1_13.1_rev_7	1	0			0						28sep18_CZECH_m2	CZECH male	CZECH	male	Musc	M.musculus										0
23jul19_28sep18_CZECH_m2_sp1_15.1_rev	53	4	0.076006	10	23jul19_28sep18_CZECH_m2_sp1_15.1_rev_10	1	0			0						28sep18_CZECH_m2	CZECH male	CZECH	male	Musc	M.musculus										0
10jun15_24mar15_G_m1_sp1_10_rev	85	4.8412	0.056852	3	10jun15_24mar15_G_m1_sp1_10_rev_3	1	0			0						24mar15_G_m1	G male	G	male	Dom	M.musculus										0
10jun15_24mar15_G_m1_sp1_11_rev	78	3.1604	0.04051	1	10jun15_24mar15_G_m1_sp1_11_rev_1	1	0			0						24mar15_G_m1	G male	G	male	Dom	M.musculus										0
10jun15_24mar15_G_m1_sp1_15_rev	61	0.64516	0.010637	3	10jun15_24mar15_G_m1_sp1_15_rev_3	1	0			0						24mar15_G_m1	G male	G	male	Dom	M.musculus										0
10jun15_24mar15_G_m1_sp1_25_rev	82	4.0026	0.048953	4	10jun15_24mar15_G_m1_sp1_25_rev_4	1	0			0						24mar15_G_m1	G male	G	male	Dom	M.musculus										0
12may15_30sep14_G_m5_sp1_15.2_rev	47	4.9399	0.10617	1	12may15_30sep14_G_m5_sp1_15.2_rev_1	1	0			0						30sep14_G_m5	G male	G	male	Dom	M.musculus										0
12may15_30sep14_G_m5_sp1_15.2_rev	82	3.3951	0.041306	14	12may15_30sep14_G_m5_sp1_15.2_rev_14	1	0			0						30sep14_G_m5	G male	G	male	Dom	M.musculus										0
12may15_30sep14_G_m5_sp1_15.2_rev	71	2.2581	0.032005	19	12may15_30sep14_G_m5_sp1_15.2_rev_19	1	0			0						30sep14_G_m5	G male	G	male	Dom	M.musculus										0
12may15_30sep14_G_m5_sp1_20_rev	114	5.8463	0.051096	6	12may15_30sep14_G_m5_sp1_20_rev_6	1	0			0					foci too faint	30sep14_G_m5	G male	G	male	Dom	M.musculus										0
12may15_30sep14_G_m5_sp1_22_rev	58	5.9286	0.10241	15	12may15_30sep14_G_m5_sp1_22_rev_15	1	0			0						30sep14_G_m5	G male	G	male	Dom	M.musculus										0
16feb16_17mar16_G_f4_sp1_7_rev	91	6.8014	0.074991	17	16feb16_17mar16_G_f4_sp1_7_rev_17	1	0			0						17mar16_G_f4	G female	G	female	Dom	M.musculus										0
17feb15_13oct14_G_f2_sp1_3_rev	89	7.3873	0.083117	15	17feb15_13oct14_G_f2_sp1_3_rev_15	1	0			0						13oct14_G_f2	G female	G	female	Dom	M.musculus										0
17nov16_17mar16_G_f1_sp1_12_rev	98	8.2857	0.084552	4	17nov16_17mar16_G_f1_sp1_12_rev_4	1	0			0						17mar16_G_f1	G female	G	female	Dom	M.musculus										0
17nov16_17mar16_G_f1_sp1_14_rev	111	2.8537	0.025683	16	17nov16_17mar16_G_f1_sp1_14_rev_16	1	0			0						17mar16_G_f1	G female	G	female	Dom	M.musculus										0
1mar16_20feb16_G_f3_sp1_17_rev	108	3.4749	0.032288	18	1mar16_20feb16_G_f3_sp1_17_rev_18	1	0			0						20feb16_G_f3	G female	G	female	Dom	M.musculus										0
27mar16_6mar16_G_m1_sp1_12.1_rev	87	2.8209	0.032379	11	27mar16_6mar16_G_m1_sp1_12.1_rev_11	1	0			0						6mar16_G_m1	G male	G	male	Dom	M.musculus										0
27mar16_6mar16_G_m1_sp1_9_rev	62	2.9366	0.047264	14	27mar16_6mar16_G_m1_sp1_9_rev_14	1	0			0						6mar16_G_m1	G male	G	male	Dom	M.musculus										0
27mar16_6mar16_G_m2_sp1_8.1_rev	64	5.2956	0.08295	1	27mar16_6mar16_G_m2_sp1_8.1_rev_1	1	0			0						6mar16_G_m2	G male	G	male	Dom	M.musculus										0
27mar16_6mar16_G_m3_sp1_1_rev	78	1.9178	0.024736	14	27mar16_6mar16_G_m3_sp1_1_rev_14	1	0			0						6mar16_G_m3	G male	G	male	Dom	M.musculus										0
27mar16_6mar16_G_m3_sp1_1_rev	49	5.2444	0.10748	4	27mar16_6mar16_G_m3_sp1_1_rev_4	1	0			0						6mar16_G_m3	G male	G	male	Dom	M.musculus										0
5jun18_21may18_KAZ_m2_sp1_12_rev	87	3.4384	0.039669	11	5jun18_21may18_KAZ_m2_sp1_12_rev_11	1	0			0						21may18_KAZ_m2	KAZ male	KAZ	male	Musc	M.musculus										0
5jun18_21may18_KAZ_m2_sp1_12_rev	75	5.0404	0.06749	14	5jun18_21may18_KAZ_m2_sp1_12_rev_14	1	0			0						21may18_KAZ_m2	KAZ male	KAZ	male	Musc	M.musculus										0
5jun18_21may18_KAZ_m2_sp1_12_rev	77	3.4783	0.045	6	5jun18_21may18_KAZ_m2_sp1_12_rev_6	1	0			0						21may18_KAZ_m2	KAZ male	KAZ	male	Musc	M.musculus										0
5jun18_21may18_KAZ_m2_sp1_14_rev	73	4.5022	0.062034	8	5jun18_21may18_KAZ_m2_sp1_14_rev_8	1	0			0						21may18_KAZ_m2	KAZ male	KAZ	male	Musc	M.musculus										0
5jun18_21may18_KAZ_m2_sp1_15.2_rev	57	3.75	0.065438	1	5jun18_21may18_KAZ_m2_sp1_15.2_rev_1	1	0			0						21may18_KAZ_m2	KAZ male	KAZ	male	Musc	M.musculus										0
5jun18_21may18_KAZ_m2_sp1_18_rev	77	5.0501	0.065233	10	5jun18_21may18_KAZ_m2_sp1_18_rev_10	1	0			0						21may18_KAZ_m2	KAZ male	KAZ	male	Musc	M.musculus										0
5jun18_21may18_KAZ_m2_sp1_18_rev	73	4.375	0.059803	4	5jun18_21may18_KAZ_m2_sp1_18_rev_4	1	0			0						21may18_KAZ_m2	KAZ male	KAZ	male	Musc	M.musculus										0
5jun18_21may18_KAZ_m2_sp1_19.2_rev	57	3.7143	0.064936	18	5jun18_21may18_KAZ_m2_sp1_19.2_rev_18	1	0			0						21may18_KAZ_m2	KAZ male	KAZ	male	Musc	M.musculus										0
5jun18_21may18_KAZ_m2_sp1_21_rev	49	4.6034	0.093049	13	5jun18_21may18_KAZ_m2_sp1_21_rev_13	1	0			0						21may18_KAZ_m2	KAZ male	KAZ	male	Musc	M.musculus										0
5jun18_21may18_KAZ_m2_sp1_21_rev	57	4.8905	0.085722	2	5jun18_21may18_KAZ_m2_sp1_21_rev_2	1	0			0						21may18_KAZ_m2	KAZ male	KAZ	male	Musc	M.musculus										0
5jun18_21may18_KAZ_m2_sp1_21_rev	98	4.6016	0.047	6	5jun18_21may18_KAZ_m2_sp1_21_rev_6	1	0			0						21may18_KAZ_m2	KAZ male	KAZ	male	Musc	M.musculus										0
5jun18_21may18_KAZ_m2_sp1_4_rev	71	3.3745	0.047617	6	5jun18_21may18_KAZ_m2_sp1_4_rev_6	1	0			0						21may18_KAZ_m2	KAZ male	KAZ	male	Musc	M.musculus										0
5jun18_21may18_KAZ_m2_sp1_7_rev	59	5.5738	0.094656	1	5jun18_21may18_KAZ_m2_sp1_7_rev_1	1	0			0						21may18_KAZ_m2	KAZ male	KAZ	male	Musc	M.musculus										0
5jun18_21may18_KAZ_m2_sp1_7_rev	75	5.5861	0.074559	2	5jun18_21may18_KAZ_m2_sp1_7_rev_2	1	0			0						21may18_KAZ_m2	KAZ male	KAZ	male	Musc	M.musculus										0
5jun18_21may18_KAZ_m2_sp1_8.2_rev	70	4.2458	0.060668	14	5jun18_21may18_KAZ_m2_sp1_8.2_rev_14	1	0			0						21may18_KAZ_m2	KAZ male	KAZ	male	Musc	M.musculus										0
5jun18_21may18_KAZ_m2_sp1_8.2_rev	82	2.5	0.030353	9	5jun18_21may18_KAZ_m2_sp1_8.2_rev_9	1	0			0						21may18_KAZ_m2	KAZ male	KAZ	male	Musc	M.musculus										0
5jun18_21may18_KAZ_m2_sp1_8.3_rev	80	4.4924	0.055892	2	5jun18_21may18_KAZ_m2_sp1_8.3_rev_2	1	0			0						21may18_KAZ_m2	KAZ male	KAZ	male	Musc	M.musculus										0
5jun18_21may18_KAZ_m2_sp1_9.2_rev	51	2.8986	0.057331	17	5jun18_21may18_KAZ_m2_sp1_9.2_rev_17	1	0			0						21may18_KAZ_m2	KAZ male	KAZ	male	Musc	M.musculus										0
26jan18_11jan18_KAZ_m3_sp1_1_rev	76	4.5428	0.059607	29	26jan18_11jan18_KAZ_m3_sp1_1_rev_29	1	0			0						11jan18_KAZ_m3	KAZ male	KAZ	male	Musc	M.musculus										0
26jan18_11jan18_KAZ_m3_sp1_3_rev	56	2.807	0.050002	2	26jan18_11jan18_KAZ_m3_sp1_3_rev_2	1	0			0						11jan18_KAZ_m3	KAZ male	KAZ	male	Musc	M.musculus										0
26jan18_11jan18_KAZ_m3_sp1_9.2_rev	87	8.1556	0.093474	7	26jan18_11jan18_KAZ_m3_sp1_9.2_rev_7	1	0			0						11jan18_KAZ_m3	KAZ male	KAZ	male	Musc	M.musculus										0
10jan18_13jan17_LEW_f1_sp1_14_rev	58	4.7961	0.082121	18	10jan18_13jan17_LEW_f1_sp1_14_rev_18	1	0			0						13jan17_LEW_f1	LEW female	LEW	female	Dom	M.musculus										0
30jun17_4jan17_LEW_f3_sp1_1_rev	95	5.4399	0.057288	1	30jun17_4jan17_LEW_f3_sp1_1_rev_1	1	0			0						4jan17_LEW_f3	LEW female	LEW	female	Dom	M.musculus										0
30jun17_4jan17_LEW_f3_sp1_1_rev	129	4.2713	0.033218	4	30jun17_4jan17_LEW_f3_sp1_1_rev_4	1	0			0						4jan17_LEW_f3	LEW female	LEW	female	Dom	M.musculus										0
6jun18_13jan17_LEW_f2_sp1_1_rev	105	3.566	0.033815	2	6jun18_13jan17_LEW_f2_sp1_1_rev_2	1	0			0						13jan17_LEW_f2	LEW female	LEW	female	Dom	M.musculus										0
19jan17_4jan17_LEW_f6_sp1_9_rev	87	2.4658	0.028325	3	19jan17_4jan17_LEW_f6_sp1_9_rev_3	1	0			0						4jan17_LEW_f6	LEW female	LEW	female	Dom	M.musculus										0
3mar15_13jan17_LEW_m1_sp1_11.2_rev	80	6.6956	0.083548	12	3mar15_13jan17_LEW_m1_sp1_11.2_rev_12	1	0			0						13jan17_LEW_m1	LEW male	LEW	male	Dom	M.musculus										0
6mar18_1feb18_LEW_m1_sp1_13_rev	49	3.0303	0.061639	4	6mar18_1feb18_LEW_m1_sp1_13_rev_4	1	0			0						1feb18_LEW_m1	LEW male	LEW	male	Dom	M.musculus										0
6mar18_1feb18_LEW_m1_sp1_3_rev	72	3.5821	0.049484	7	6mar18_1feb18_LEW_m1_sp1_3_rev_7	1	0			0						1feb18_LEW_m1	LEW male	LEW	male	Dom	M.musculus										0
6mar18_1feb18_LEW_m1_sp1_6.2_rev	70	4.0474	0.058027	14	6mar18_1feb18_LEW_m1_sp1_6.2_rev_14	1	0			0						1feb18_LEW_m1	LEW male	LEW	male	Dom	M.musculus										0
6mar18_1feb18_LEW_m1_sp1_8.1_rev	52	5.3929	0.10283	7	6mar18_1feb18_LEW_m1_sp1_8.1_rev_7	1	0			0						1feb18_LEW_m1	LEW male	LEW	male	Dom	M.musculus										0
8feb17_20dec16_LEW_m1_sp1_15.2_rev	64	7.532	0.11792	18	8feb17_20dec16_LEW_m1_sp1_15.2_rev_18	1	0			0						20dec16_LEW_m1	LEW male	LEW	male	Dom	M.musculus										0
13sep18_28jun18_MOLF_m1_sp1_12.1_rev	48	4.6005	0.095724	15	13sep18_28jun18_MOLF_m1_sp1_12.1_rev_15	1	0			0						28jun18_MOLF_m1	MOLF male	MOLF	male	Mol	M.musculus										0
13sep18_28jun18_MOLF_m1_sp1_14.1_rev	74	3.1784	0.042899	3	13sep18_28jun18_MOLF_m1_sp1_14.1_rev_3	1	0			0						28jun18_MOLF_m1	MOLF male	MOLF	male	Mol	M.musculus										0
13sep18_28jun18_MOLF_m1_sp1_19.1_rev	52	3.8879	0.07414	1	13sep18_28jun18_MOLF_m1_sp1_19.1_rev_1	1	0			0						28jun18_MOLF_m1	MOLF male	MOLF	male	Mol	M.musculus										0
13sep18_28jun18_MOLF_m1_sp1_20_rev	51	2.029	0.040144	7	13sep18_28jun18_MOLF_m1_sp1_20_rev_7	1	0			0						28jun18_MOLF_m1	MOLF male	MOLF	male	Mol	M.musculus										0
13sep18_28jun18_MOLF_m1_sp1_5.1_rev	71	1.0345	0.01461	9	13sep18_28jun18_MOLF_m1_sp1_5.1_rev_9	1	0			0						28jun18_MOLF_m1	MOLF male	MOLF	male	Mol	M.musculus										0
18jul19_1mar19_MOLF_m1_sp1_30.1_rev	79	4.5871	0.057767	1	18jul19_1mar19_MOLF_m1_sp1_30.1_rev_1	1	0			0						1mar19_MOLF_m1	MOLF male	MOLF	male	Mol	M.musculus										0
2aug19_28sep18_MOLF_m2_sp1_16_rev	67	2.2222	0.032941	3	2aug19_28sep18_MOLF_m2_sp1_16_rev_3	1	0			0						28sep18_MOLF_m2	MOLF male	MOLF	male	Mol	M.musculus										0
2aug19_28sep18_MOLF_m2_sp1_22_rev	92	2.7692	0.030155	3	2aug19_28sep18_MOLF_m2_sp1_22_rev_3	1	0			0						28sep18_MOLF_m2	MOLF male	MOLF	male	Mol	M.musculus										0
4jun19_28sep18_MOLF_m1_sp1_2_rev	84	4.2458	0.0507	1	4jun19_28sep18_MOLF_m1_sp1_2_rev_1	1	0			0						28sep18_MOLF_m1	MOLF male	MOLF	male	Mol	M.musculus										0
21nov17_16nov17_MSM_f3_sp1_4_rev	88	5.309	0.060111	8	21nov17_16nov17_MSM_f3_sp1_4_rev_8	1	0			0						16nov17_MSM_f3	MSM female	MSM	female	Mol	M.musculus										0
4dec17_16nov17_MSM_f2_sp1_18_rev	80	4.9361	0.061527	16	4dec17_16nov17_MSM_f2_sp1_18_rev_16	1	0			0						16nov17_MSM_f2	MSM female	MSM	female	Mol	M.musculus										0
5aug17_14jul17_MSM_f1_sp1_12_rev	97	3.3246	0.034254	12	5aug17_14jul17_MSM_f1_sp1_12_rev_12	1	0			0						14jul17_MSM_f1	MSM female	MSM	female	Mol	M.musculus										0
5aug17_14jul17_MSM_f1_sp1_12_rev	101	2.1875	0.021723	8	5aug17_14jul17_MSM_f1_sp1_12_rev_8	1	0			0						14jul17_MSM_f1	MSM female	MSM	female	Mol	M.musculus										0
5aug17_14jul17_MSM_f1_sp1_17_rev	80	4.4894	0.056327	4	5aug17_14jul17_MSM_f1_sp1_17_rev_4	1	0			0						14jul17_MSM_f1	MSM female	MSM	female	Mol	M.musculus										0
5aug17_14jul17_MSM_f1_sp1_19_rev	80	3.3308	0.041831	8	5aug17_14jul17_MSM_f1_sp1_19_rev_8	1	0			0						14jul17_MSM_f1	MSM female	MSM	female	Mol	M.musculus										0
5aug17_14jul17_MSM_f1_sp1_7_rev	102	7.0867	0.069424	6	5aug17_14jul17_MSM_f1_sp1_7_rev_6	1	0			0						14jul17_MSM_f1	MSM female	MSM	female	Mol	M.musculus										0
13mar15_28feb15_PWD_f2_sp1_10_rev	55	5.5201	0.10121	9	13mar15_28feb15_PWD_f2_sp1_10_rev_9	1	0			0						28feb15_PWD_f2	PWD female	PWD	female	Musc	M.musculus										0
13mar15_28feb15_PWD_f2_sp1_38_rev	121	11.0566	0.091027	1	13mar15_28feb15_PWD_f2_sp1_38_rev_1	1	0			0						28feb15_PWD_f2	PWD female	PWD	female	Musc	M.musculus										0
13mar15_28feb15_PWD_f2_sp1_38_rev	118	7.724	0.065659	2	13mar15_28feb15_PWD_f2_sp1_38_rev_2	1	0			0						28feb15_PWD_f2	PWD female	PWD	female	Musc	M.musculus										0
2apr15_28feb15_PWD_f3_sp1_1_rev	94	4.7129	0.050396	14	2apr15_28feb15_PWD_f3_sp1_1_rev_14	1	0			0						28feb15_PWD_f3	PWD female	PWD	female	Musc	M.musculus										0
2apr15_28feb15_PWD_f3_sp1_2_rev	103	6.6189	0.064558	5	2apr15_28feb15_PWD_f3_sp1_2_rev_5	1	0			0						28feb15_PWD_f3	PWD female	PWD	female	Musc	M.musculus										0
2aug15_8oct14_PWD_f4_sp1_10.1_rev	63	5.8141	0.092055	11	2aug15_8oct14_PWD_f4_sp1_10.1_rev_11	1	0			0						8oct14_PWD_f4	PWD female	PWD	female	Musc	M.musculus										0
20may15_17apr15_PWD_f4_sp1_12_rev	98	7.706	0.078757	1	20may15_17apr15_PWD_f4_sp1_12_rev_1	1	0			0						17apr15_PWD_f4	PWD female	PWD	female	Musc	M.musculus										0
20may15_17apr15_PWD_f4_sp1_12_rev	83	7.0179	0.084468	12	20may15_17apr15_PWD_f4_sp1_12_rev_12	1	0			0						17apr15_PWD_f4	PWD female	PWD	female	Musc	M.musculus										0
20may15_17apr15_PWD_f4_sp1_2_rev	63	9.3934	0.14852	15	20may15_17apr15_PWD_f4_sp1_2_rev_15	1	0			0						17apr15_PWD_f4	PWD female	PWD	female	Musc	M.musculus										0
20may15_17apr15_PWD_f4_sp1_20_rev	97	5.3167	0.05466	14	20may15_17apr15_PWD_f4_sp1_20_rev_14	1	0			0						17apr15_PWD_f4	PWD female	PWD	female	Musc	M.musculus										0
27mar16_6mar16_PWD_m1_sp1_3_rev	105	2.8125	0.026908	15	27mar16_6mar16_PWD_m1_sp1_3_rev_15	1	0			0						6mar16_PWD_m1	PWD male	PWD	male	Musc	M.musculus										1
7mar15_1mar15_PWD_m1_sp4_24.1_rev	97	3.6066	0.037002	4	7mar15_1mar15_PWD_m1_sp4_24.1_rev_4	1	0			0						1mar15_PWD_m1	PWD male	PWD	male	Musc	M.musculus										1
10jun19_31may19_SKIVE_f6_sp1_60_rev	100	1.875	0.018708	3	10jun19_31may19_SKIVE_f6_sp1_60_rev_3	1	0			0						31may19_SKIVE_f6	SKIVE female	SKIVE	female	Musc	M.musculus										0
11jan19_27oct18_SKIVE_m1_sp1_2.2_rev	61	4.5744	0.074858	15	11jan19_27oct18_SKIVE_m1_sp1_2.2_rev_15	1	0			0						27oct18_SKIVE_m1	SKIVE male	SKIVE	male	Musc	M.musculus										1
18jul19_31may19_SKIVE_m2_sp1_17.2_rev	58	7.1354	0.12326	9	18jul19_31may19_SKIVE_m2_sp1_17.2_rev_9	1	0			0						31may19_SKIVE_m2	SKIVE male	SKIVE	male	Musc	M.musculus										1
18sep19_19aug19_SKIVE_m2_sp1_20_rev	119	3.4286	0.028744	8	18sep19_19aug19_SKIVE_m2_sp1_20_rev_8	1	0			0						19aug19_SKIVE_m2	SKIVE male	SKIVE	male	Musc	M.musculus										1
18sep19_19aug19_SKIVE_m3_sp1_1.1_rev	86	4.2955	0.049987	5	18sep19_19aug19_SKIVE_m3_sp1_1.1_rev_5	1	0			0						19aug19_SKIVE_m3	SKIVE male	SKIVE	male	Musc	M.musculus										1
18sep19_19aug19_SKIVE_m3_sp1_1.1_rev	64	1.2308	0.019135	8	18sep19_19aug19_SKIVE_m3_sp1_1.1_rev_8	1	0			0						19aug19_SKIVE_m3	SKIVE male	SKIVE	male	Musc	M.musculus										1
10apr15_31mar15_WSB_m1_sp1_2.2_rev	84	5.311	0.063261	6	10apr15_31mar15_WSB_m1_sp1_2.2_rev_6	1	0			0						31mar15_WSB_m1	WSB male	WSB	male	Dom	M.musculus										0
11dec17_18nov17_WSB_f1_sp1_2_rev	72	3.5844	0.050061	3	11dec17_18nov17_WSB_f1_sp1_2_rev_3	1	0			0						18nov17_WSB_f1	WSB female	WSB	female	Dom	M.musculus										0
11dec17_18nov17_WSB_f1_sp1_20_rev	65	7.6868	0.11826	12	11dec17_18nov17_WSB_f1_sp1_20_rev_12	1	0			0						18nov17_WSB_f1	WSB female	WSB	female	Dom	M.musculus										0
11dec17_18nov17_WSB_f1_sp1_23_rev	101	6.0486	0.059638	7	11dec17_18nov17_WSB_f1_sp1_23_rev_7	1	0			0						18nov17_WSB_f1	WSB female	WSB	female	Dom	M.musculus										0
11dec17_18nov17_WSB_f1_sp1_4_rev	75	4.2424	0.056733	2	11dec17_18nov17_WSB_f1_sp1_4_rev_2	1	0			0						18nov17_WSB_f1	WSB female	WSB	female	Dom	M.musculus										0
14dec17_18nov17_WSB_f3_sp1_11_rev	116	6.4022	0.054995	1	14dec17_18nov17_WSB_f3_sp1_11_rev_1	1	0			0						18nov17_WSB_f3	WSB female	WSB	female	Dom	M.musculus										0
19may15_31mar15_WSB_m1_sp1_13.1_rev	56	3.323	0.059346	18	19may15_31mar15_WSB_m1_sp1_13.1_rev_18	1	0			0						31mar15_WSB_m1	WSB male	WSB	male	Dom	M.musculus										0
19may15_31mar15_WSB_m1_sp1_21.1_rev	53	2.8237	0.053242	12	19may15_31mar15_WSB_m1_sp1_21.1_rev_12	1	0			0						31mar15_WSB_m1	WSB male	WSB	male	Dom	M.musculus										0
19may15_31mar15_WSB_m1_sp1_21.1_rev	36	5.4061	0.1503	17	19may15_31mar15_WSB_m1_sp1_21.1_rev_17	1	0			0						31mar15_WSB_m1	WSB male	WSB	male	Dom	M.musculus										0
19may15_31mar15_WSB_m1_sp1_5_rev	67	12.0223	0.17851	12	19may15_31mar15_WSB_m1_sp1_5_rev_12	1	0			0						31mar15_WSB_m1	WSB male	WSB	male	Dom	M.musculus										0
26dec17_18nov17_WSB_f4_sp1_29_rev	65	2.623	0.040375	3	26dec17_18nov17_WSB_f4_sp1_29_rev_3	1	0			0						18nov17_WSB_f4	WSB female	WSB	female	Dom	M.musculus										0
10jun15_18may15_WSB_m1_sp1_16.2_rev	46	2.8169	0.061094	7	10jun15_18may15_WSB_m1_sp1_16.2_rev_7	1	0			0						18may15_WSB_m1	WSB male	WSB	male	Dom	M.musculus										0
10jun15_18may15_WSB_m1_sp1_21_rev	69	2.976	0.043349	15	10jun15_18may15_WSB_m1_sp1_21_rev_15	1	0			0						18may15_WSB_m1	WSB male	WSB	male	Dom	M.musculus										0
10jun15_18may15_WSB_m1_sp1_4_rev	54	4.6315	0.086247	1	10jun15_18may15_WSB_m1_sp1_4_rev_1	1	0			0						18may15_WSB_m1	WSB male	WSB	male	Dom	M.musculus										0
10jun15_18may15_WSB_m1_sp1_4_rev	40	3.6218	0.090353	2	10jun15_18may15_WSB_m1_sp1_4_rev_2	1	0			0						18may15_WSB_m1	WSB male	WSB	male	Dom	M.musculus										0
12jul15_12jun15_WSB_m1_sp1_1_rev	63	7.6045	0.12099	8	12jul15_12jun15_WSB_m1_sp1_1_rev_8	1	0			0						12jun15_WSB_m1	WSB male	WSB	male	Dom	M.musculus										0
12jul15_12jun15_WSB_m1_sp1_13.1_rev	87	5.445	0.062897	16	12jul15_12jun15_WSB_m1_sp1_13.1_rev_16	1	0			0						12jun15_WSB_m1	WSB male	WSB	male	Dom	M.musculus										0
27aug15_12jun15_WSB_m2_sp1_10_rev	57	5.2325	0.092585	13	27aug15_12jun15_WSB_m2_sp1_10_rev_13	1	0			0						12jun15_WSB_m2	WSB male	WSB	male	Dom	M.musculus										0
22jul19_26oct18_SKIVE_f3_sp1_12.2_rev	121	5.9794	0.049462	16	22jul19_26oct18_SKIVE_f3_sp1_12.2_rev_16	1	0			0						26oct18_SKIVE_f3	SKIVE female	SKIVE	female	Musc	M.musculus										0
22jul19_26oct18_SKIVE_f3_sp1_22_rev	85	4.9703	0.058697	14	22jul19_26oct18_SKIVE_f3_sp1_22_rev_14	1	0			0						26oct18_SKIVE_f3	SKIVE female	SKIVE	female	Musc	M.musculus										0
14mar16_16jan16_G_f1_sp1_1_rev	92	6.1339	0.066818	2	14mar16_16jan16_G_f1_sp1_1_rev_2	1	0			1	3				several smaller bright foci	16jan16_G_f1	G female	G	female	Dom	M.musculus					0.0326086956521739				89	0
10jun19_31may19_SKIVE_f6_sp1_21_rev	99	4.991	0.05032	15	10jun19_31may19_SKIVE_f6_sp1_21_rev_15	1	0			1	9					31may19_SKIVE_f6	SKIVE female	SKIVE	female	Musc	M.musculus					0.0909090909090909				90	0
24may17_17mar16_G_f5_sp1_8_rev	71	4.9904	0.070288	4	24may17_17mar16_G_f5_sp1_8_rev_4	1	0			1	7					17mar16_G_f5	G female	G	female	Dom	M.musculus					0.0985915492957746				64	0
5jun18_21may18_KAZ_m2_sp1_12_rev	87	4.6242	0.052931	10	5jun18_21may18_KAZ_m2_sp1_12_rev_10	1	0			1	9					21may18_KAZ_m2	KAZ male	KAZ	male	Musc	M.musculus					0.103448275862069				78	0
15mar17_13jan17_LEW_f3_sp1_22_rev	112	2.6471	0.023593	5	15mar17_13jan17_LEW_f3_sp1_22_rev_5	1	0			1	12					13jan17_LEW_f3	LEW female	LEW	female	Dom	M.musculus					0.107142857142857				100	0
30jun17_4jan17_LEW_f3_sp1_8_rev	144	4.7827	0.033213	15	30jun17_4jan17_LEW_f3_sp1_8_rev_15	1	0			1	16					4jan17_LEW_f3	LEW female	LEW	female	Dom	M.musculus					0.111111111111111				128	0
7mar15_1mar15_PWD_m1_sp4_7_rev	125	4.5308	0.036377	26	7mar15_1mar15_PWD_m1_sp4_7_rev_26	1	0			1	15					1mar15_PWD_m1	PWD male	PWD	male	Musc	M.musculus					0.12				110	1
27jul19_26oct18_SKIVE_f2_sp1_40_rev	131	3.0769	0.023521	10	27jul19_26oct18_SKIVE_f2_sp1_40_rev_10	1	0			1	16				some other faint foci	26oct18_SKIVE_f2	SKIVE female	SKIVE	female	Musc	M.musculus					0.12213740458015267				115	0
15mar17_13jan17_LEW_f3_sp1_12_rev	96	4.4326	0.046233	20	15mar17_13jan17_LEW_f3_sp1_12_rev_20	1	0			1	12					13jan17_LEW_f3	LEW female	LEW	female	Dom	M.musculus					0.125				84	0
5jun18_21may18_KAZ_m2_sp1_7_rev	90	4.2871	0.047897	7	5jun18_21may18_KAZ_m2_sp1_7_rev_7	1	0			1	12					21may18_KAZ_m2	KAZ male	KAZ	male	Musc	M.musculus					0.133333333333333				78	0
12dec17_18nov17_WSB_f2_sp1_8_rev	165	6.0013	0.036308	5	12dec17_18nov17_WSB_f2_sp1_8_rev_5	1	0			1	22					18nov17_WSB_f2	WSB female	WSB	female	Dom	M.musculus					0.133333333333333				143	0
4dec17_16nov17_MSM_f2_sp1_18_rev	82	3.485	0.0426	13	4dec17_16nov17_MSM_f2_sp1_18_rev_13	1	0			1	11					16nov17_MSM_f2	MSM female	MSM	female	Mol	M.musculus					0.134146341463415				71	0
27jul19_26oct18_SKIVE_f2_sp1_29_rev	118	5.086	0.043152	23	27jul19_26oct18_SKIVE_f2_sp1_29_rev_23	1	0			1	16					26oct18_SKIVE_f2	SKIVE female	SKIVE	female	Musc	M.musculus					0.13559322033898305				102	0
27mar16_6mar16_PWD_m1_sp1_5_rev	86	5.1717	0.060262	18	27mar16_6mar16_PWD_m1_sp1_5_rev_18	1	0			1	12					6mar16_PWD_m1	PWD male	PWD	male	Musc	M.musculus					0.13953488372093				74	1
6mar15_1mar15_PWD_m1_sp4_4_rev	106	3.9416	0.037034	1	6mar15_1mar15_PWD_m1_sp4_4_rev_1	1	0			1	15					1mar15_PWD_m1	PWD male	PWD	male	Musc	M.musculus					0.141509433962264				91	1
19jan17_4jan17_LEW_f6_sp1_27_rev	134	6.4515	0.048106	1	19jan17_4jan17_LEW_f6_sp1_27_rev_1	1	0			1	19					4jan17_LEW_f6	LEW female	LEW	female	Dom	M.musculus					0.141791044776119				115	0
7feb18_11jan18_KAZ_m4_sp1_8_rev	84	6.9077	0.082411	4	7feb18_11jan18_KAZ_m4_sp1_8_rev_4	1	0			1	12					11jan18_KAZ_m4	KAZ male	KAZ	male	Musc	M.musculus					0.142857142857143				72	0
27jul19_26oct18_SKIVE_f2_sp1_27_rev	113	3.9884	0.035324	14	27jul19_26oct18_SKIVE_f2_sp1_27_rev_14	1	0			1	18					26oct18_SKIVE_f2	SKIVE female	SKIVE	female	Musc	M.musculus					0.1592920353982301				95	0
23jul19_28sep18_CZECH_m2_sp1_15.1_rev	122	5.7911	0.047625	9	23jul19_28sep18_CZECH_m2_sp1_15.1_rev_9	1	0			1	20					28sep18_CZECH_m2	CZECH male	CZECH	male	Musc	M.musculus					0.163934426229508				102	0
18sep19_19aug19_SKIVE_m3_sp1_1.1_rev	97	3.8309	0.039525	13	18sep19_19aug19_SKIVE_m3_sp1_1.1_rev_13	1	0			1	16					19aug19_SKIVE_m3	SKIVE male	SKIVE	male	Musc	M.musculus					0.164948453608247				81	1
26jan18_11jan18_KAZ_m3_sp1_17_rev	102	2.7027	0.026459	5	26jan18_11jan18_KAZ_m3_sp1_17_rev_5	1	0			1	17					11jan18_KAZ_m3	KAZ male	KAZ	male	Musc	M.musculus					0.166666666666667				85	0
8feb18_1feb18_KAZ_f1_sp1_22_rev	77	3.7268	0.048698	14	8feb18_1feb18_KAZ_f1_sp1_22_rev_14	1	0			1	13					1feb18_KAZ_f1	KAZ female	KAZ	female	Musc	M.musculus					0.168831168831169				64	0
14dec17_18nov17_WSB_f3_sp1_27_rev	225	4.3096	0.019151	5	14dec17_18nov17_WSB_f3_sp1_27_rev_5	1	0			1	38					18nov17_WSB_f3	WSB female	WSB	female	Dom	M.musculus					0.168888888888889				187	0
19jan17_4jan17_LEW_f6_sp1_27_rev	136	8.2388	0.060682	4	19jan17_4jan17_LEW_f6_sp1_27_rev_4	1	0			1	23					4jan17_LEW_f6	LEW female	LEW	female	Dom	M.musculus					0.169117647058824				113	0
26jan18_11jan18_KAZ_m3_sp1_1_rev	75	3.714	0.049603	35	26jan18_11jan18_KAZ_m3_sp1_1_rev_35	1	0			1	13					11jan18_KAZ_m3	KAZ male	KAZ	male	Musc	M.musculus					0.173333333333333				62	0
17nov16_17mar16_G_f1_sp1_12_rev	155	5.5253	0.03557	1	17nov16_17mar16_G_f1_sp1_12_rev_1	1	0			1	27					17mar16_G_f1	G female	G	female	Dom	M.musculus					0.174193548387097				128	0
8feb18_1feb18_KAZ_f1_sp1_28_rev	132	3.3579	0.025522	11	8feb18_1feb18_KAZ_f1_sp1_28_rev_11	1	0			1	23					1feb18_KAZ_f1	KAZ female	KAZ	female	Musc	M.musculus					0.174242424242424				109	0
14dec17_18nov17_WSB_f3_sp1_22_rev	166	5.553	0.033447	1	14dec17_18nov17_WSB_f3_sp1_22_rev_1	1	0			1	29					18nov17_WSB_f3	WSB female	WSB	female	Dom	M.musculus					0.174698795180723				137	0
12feb15_13oct14_G_f2_sp1_10_rev	120	2.2581	0.018771	8	12feb15_13oct14_G_f2_sp1_10_rev_8	1	0			1	21					13oct14_G_f2	G female	G	female	Dom	M.musculus					0.175				99	0
19jan17_4jan17_LEW_f6_sp1_39_rev	80	0.88235	0.011089	13	19jan17_4jan17_LEW_f6_sp1_39_rev_13	1	0			1	14					4jan17_LEW_f6	LEW female	LEW	female	Dom	M.musculus					0.175				66	0
2aug15_8oct14_PWD_f4_sp1_7_rev	97	5.1275	0.052926	4	2aug15_8oct14_PWD_f4_sp1_7_rev_4	1	0			1	17					8oct14_PWD_f4	PWD female	PWD	female	Musc	M.musculus					0.175257731958763				80	0
4jun19_28sep18_MOLF_m1_sp1_10.1_rev	74	4.9772	0.067257	14	4jun19_28sep18_MOLF_m1_sp1_10.1_rev_14	1	0			1	13					28sep18_MOLF_m1	MOLF male	MOLF	male	Mol	M.musculus					0.175675675675676				61	0
12feb15_13oct14_G_f2_sp1_1_rev	91	3.0986	0.033869	10	12feb15_13oct14_G_f2_sp1_1_rev_10	1	0			1	16					13oct14_G_f2	G female	G	female	Dom	M.musculus					0.175824175824176				75	0
7mar15_1mar15_PWD_m1_sp4_6.2_rev	91	4.2222	0.046247	6	7mar15_1mar15_PWD_m1_sp4_6.2_rev_6	1	0			1	16					1mar15_PWD_m1	PWD male	PWD	male	Musc	M.musculus					0.175824175824176				75	1
5jan19_27oct18_SKIVE_m2_sp1_5_rev	91	4.1791	0.04615	7	5jan19_27oct18_SKIVE_m2_sp1_5_rev_7	1	0			1	16					27oct18_SKIVE_m2	SKIVE male	SKIVE	male	Musc	M.musculus					0.175824175824176				75	1
4dec17_16nov17_MSM_f2_sp1_21_rev	117	7.4662	0.063645	3	4dec17_16nov17_MSM_f2_sp1_21_rev_3	1	0			1	21					16nov17_MSM_f2	MSM female	MSM	female	Mol	M.musculus					0.179487179487179				96	0
15mar17_13jan17_LEW_f3_sp1_7_rev	94	2.2222	0.02354	16	15mar17_13jan17_LEW_f3_sp1_7_rev_16	1	0			1	17					13jan17_LEW_f3	LEW female	LEW	female	Dom	M.musculus					0.180851063829787				77	0
12feb15_13oct14_G_f2_sp1_9_rev	116	1.25	0.010795	21	12feb15_13oct14_G_f2_sp1_9_rev_21	1	0			1	21					13oct14_G_f2	G female	G	female	Dom	M.musculus					0.181034482758621				95	0
5jun18_21may18_KAZ_m2_sp1_15.2_rev	77	3.4375	0.044929	21	5jun18_21may18_KAZ_m2_sp1_15.2_rev_21	1	0			1	14					21may18_KAZ_m2	KAZ male	KAZ	male	Musc	M.musculus					0.181818181818182				63	0
7mar15_1mar15_PWD_m1_sp4_23_rev	82	3.7107	0.045336	7	7mar15_1mar15_PWD_m1_sp4_23_rev_7	1	0			1	15					1mar15_PWD_m1	PWD male	PWD	male	Musc	M.musculus					0.182926829268293				67	1
26jan18_11jan18_KAZ_m3_sp1_9.1_rev	60	4.1498	0.068795	1	26jan18_11jan18_KAZ_m3_sp1_9.1_rev_1	1	0			1	11					11jan18_KAZ_m3	KAZ male	KAZ	male	Musc	M.musculus					0.183333333333333				49	0
26jan18_11jan18_KAZ_m3_sp1_8_rev	65	3.3898	0.052221	20	26jan18_11jan18_KAZ_m3_sp1_8_rev_20	1	0			1	12					11jan18_KAZ_m3	KAZ male	KAZ	male	Musc	M.musculus					0.184615384615385				53	0
7mar15_1mar15_PWD_m1_sp4_7_rev	92	5.0895	0.055605	10	7mar15_1mar15_PWD_m1_sp4_7_rev_10	1	0			1	17					1mar15_PWD_m1	PWD male	PWD	male	Musc	M.musculus					0.184782608695652				75	1
20jul15_18may15_PWD_m2_sp1_19_rev	86	9.4833	0.11025	17	20jul15_18may15_PWD_m2_sp1_19_rev_17	1	0			1	16	82				18may15_PWD_m2	PWD male	PWD	male	Musc	M.musculus					0.186046511627907	0.953488372093023			70	1
12dec17_18nov17_WSB_f2_sp1_23_rev	86	3.5821	0.041542	2	12dec17_18nov17_WSB_f2_sp1_23_rev_2	1	0			1	16					18nov17_WSB_f2	WSB female	WSB	female	Dom	M.musculus					0.186046511627907				70	0
7feb18_11jan18_KAZ_m4_sp1_26.1_rev	75	6.1405	0.081718	6	7feb18_11jan18_KAZ_m4_sp1_26.1_rev_6	1	0			1	14					11jan18_KAZ_m4	KAZ male	KAZ	male	Musc	M.musculus					0.186666666666667				61	0
11jan19_27oct18_SKIVE_m1_sp1_16.1_rev	75	4.6362	0.061991	2	11jan19_27oct18_SKIVE_m1_sp1_16.1_rev_2	1	0			1	14					27oct18_SKIVE_m1	SKIVE male	SKIVE	male	Musc	M.musculus					0.186666666666667				61	1
6mar15_1mar15_PWD_m1_sp4_8_rev	117	4.6245	0.03965	14	6mar15_1mar15_PWD_m1_sp4_8_rev_14	1	0			1	22					1mar15_PWD_m1	PWD male	PWD	male	Musc	M.musculus					0.188034188034188				95	1
29nov16_13nov16_MSM_m2_sp1_5_rev	53	6.1754	0.11621	2	29nov16_13nov16_MSM_m2_sp1_5_rev_2	1	0			1	10					13nov16_MSM_m2	MSM male	MSM	male	Mol	M.musculus					0.188679245283019				43	1
19jan17_4jan17_LEW_f7_sp1_7_rev	90	4.1994	0.046803	5	19jan17_4jan17_LEW_f7_sp1_7_rev_5	1	0			1	17					4jan17_LEW_f7	LEW female	LEW	female	Dom	M.musculus					0.188888888888889				73	0
26dec17_18nov17_WSB_f4_sp1_12_rev	90	7.7211	0.085365	17	26dec17_18nov17_WSB_f4_sp1_12_rev_17	1	0			1	17					18nov17_WSB_f4	WSB female	WSB	female	Dom	M.musculus					0.188888888888889				73	0
27jul19_26oct18_SKIVE_f2_sp1_25_rev	95	3.5633	0.037404	18	27jul19_26oct18_SKIVE_f2_sp1_25_rev_18	1	0			1	18				some faint flanking foci	26oct18_SKIVE_f2	SKIVE female	SKIVE	female	Musc	M.musculus					0.18947368421052632				77	0
26dec17_18nov17_WSB_f4_sp1_26_rev	100	3.5294	0.03531	2	26dec17_18nov17_WSB_f4_sp1_26_rev_2	1	0			1	19					18nov17_WSB_f4	WSB female	WSB	female	Dom	M.musculus					0.19				81	0
5aug17_14jul17_MSM_f1_sp1_6_rev	157	4.1419	0.026412	15	5aug17_14jul17_MSM_f1_sp1_6_rev_15	1	0			1	30					14jul17_MSM_f1	MSM female	MSM	female	Mol	M.musculus					0.191082802547771				127	0
8jun15_23apr15_PWD_f2_sp1_17_rev	115	5.9007	0.051246	19	8jun15_23apr15_PWD_f2_sp1_17_rev_19	1	0			1	22					23apr15_PWD_f2	PWD female	PWD	female	Musc	M.musculus					0.191304347826087				93	0
9aug15_17apr15_PWD_f2_sp1_35_rev	104	4.5551	0.043935	5	9aug15_17apr15_PWD_f2_sp1_35_rev_5	1	0			1	20					17apr15_PWD_f2	PWD female	PWD	female	Musc	M.musculus					0.192307692307692				84	0
8jun15_23apr15_PWD_f2_sp1_3_rev	83	5.8646	0.070341	11	8jun15_23apr15_PWD_f2_sp1_3_rev_11	1	0			1	16					23apr15_PWD_f2	PWD female	PWD	female	Musc	M.musculus					0.192771084337349				67	0
7mar15_1mar15_PWD_m1_sp4_1.1_rev	88	4.91	0.055608	10	7mar15_1mar15_PWD_m1_sp4_1.1_rev_10	1	0			1	17					1mar15_PWD_m1	PWD male	PWD	male	Musc	M.musculus					0.193181818181818				71	1
10jun19_31may19_SKIVE_f6_sp1_21_rev	93	4.7894	0.051538	2	10jun19_31may19_SKIVE_f6_sp1_21_rev_2	1	0			1	18					31may19_SKIVE_f6	SKIVE female	SKIVE	female	Musc	M.musculus					0.193548387096774				75	0
14dec17_18nov17_WSB_f3_sp1_26_rev	62	1.2121	0.019416	11	14dec17_18nov17_WSB_f3_sp1_26_rev_11	1	0			1	12					18nov17_WSB_f3	WSB female	WSB	female	Dom	M.musculus					0.193548387096774				50	0
27mar16_6mar16_G_m2_sp1_8.2_rev	61	4.1662	0.068	1	27mar16_6mar16_G_m2_sp1_8.2_rev_1	1	0			1	12					6mar16_G_m2	G male	G	male	Dom	M.musculus					0.19672131147541				49	0
8feb18_1feb18_KAZ_f1_sp1_6_rev	91	6.0381	0.066298	2	8feb18_1feb18_KAZ_f1_sp1_6_rev_2	1	0			1	18					1feb18_KAZ_f1	KAZ female	KAZ	female	Musc	M.musculus					0.197802197802198				73	0
15mar17_13jan17_LEW_f3_sp1_15_rev	91	1.2308	0.013575	3	15mar17_13jan17_LEW_f3_sp1_15_rev_3	1	0			1	18					13jan17_LEW_f3	LEW female	LEW	female	Dom	M.musculus					0.197802197802198				73	0
22jul19_26oct18_SKIVE_f3_sp1_22_rev	121	4.5328	0.037455	24	22jul19_26oct18_SKIVE_f3_sp1_22_rev_24	1	0			1	24					26oct18_SKIVE_f3	SKIVE female	SKIVE	female	Musc	M.musculus					0.19834710743801653				97	0
19jan17_4jan17_LEW_f6_sp1_11_rev	115	2.2535	0.019635	9	19jan17_4jan17_LEW_f6_sp1_11_rev_9	1	0			1	23					4jan17_LEW_f6	LEW female	LEW	female	Dom	M.musculus					0.2				92	0
30jun17_4jan17_LEW_f3_sp1_3_rev	90	3.3506	0.037127	4	30jun17_4jan17_LEW_f3_sp1_3_rev_4	1	0			1	18					4jan17_LEW_f3	LEW female	LEW	female	Dom	M.musculus					0.2				72	0
21nov17_16nov17_MSM_f3_sp1_19_rev	125	8.4949	0.068013	9	21nov17_16nov17_MSM_f3_sp1_19_rev_9	1	0			1	25					16nov17_MSM_f3	MSM female	MSM	female	Mol	M.musculus					0.2				100	0
2apr15_28feb15_PWD_f3_sp1_5_rev	120	5.4915	0.045774	15	2apr15_28feb15_PWD_f3_sp1_5_rev_15	1	0			1	24					28feb15_PWD_f3	PWD female	PWD	female	Musc	M.musculus					0.2				96	0
15mar17_13jan17_LEW_f3_sp1_30_rev	104	5.8866	0.056373	5	15mar17_13jan17_LEW_f3_sp1_30_rev_5	1	0			1	21					13jan17_LEW_f3	LEW female	LEW	female	Dom	M.musculus					0.201923076923077				83	0
6jun18_13jan17_LEW_f2_sp1_1_rev	84	6.0808	0.072711	19	6jun18_13jan17_LEW_f2_sp1_1_rev_19	1	0			1	17					13jan17_LEW_f2	LEW female	LEW	female	Dom	M.musculus					0.202380952380952				67	0
14dec17_18nov17_WSB_f3_sp1_9_rev	84	3.0769	0.036714	19	14dec17_18nov17_WSB_f3_sp1_9_rev_19	1	0			1	17					18nov17_WSB_f3	WSB female	WSB	female	Dom	M.musculus					0.202380952380952				67	0
27jul19_26oct18_SKIVE_f2_sp1_13_rev	84	2.6471	0.031442	20	27jul19_26oct18_SKIVE_f2_sp1_13_rev_20	1	0			1	17					26oct18_SKIVE_f2	SKIVE female	SKIVE	female	Musc	M.musculus					0.20238095238095238				67	0
19jan17_4jan17_LEW_f6_sp1_35_rev	69	5.1091	0.074013	10	19jan17_4jan17_LEW_f6_sp1_35_rev_10	1	0			1	14					4jan17_LEW_f6	LEW female	LEW	female	Dom	M.musculus					0.202898550724638				55	0
19jan17_4jan17_LEW_f6_sp1_23_rev	64	2.3529	0.036523	16	19jan17_4jan17_LEW_f6_sp1_23_rev_16	1	0			1	13					4jan17_LEW_f6	LEW female	LEW	female	Dom	M.musculus					0.203125				51	0
20apr18_11jan18_KAZ_f1_sp1_9_rev	113	3.8864	0.034508	18	20apr18_11jan18_KAZ_f1_sp1_9_rev_18	1	0			1	23					11jan18_KAZ_f1	KAZ female	KAZ	female	Musc	M.musculus					0.20353982300885				90	0
23jul19_28sep18_CZECH_m2_sp1_23_rev	103	5.8446	0.056502	2	23jul19_28sep18_CZECH_m2_sp1_23_rev_2	1	0			1	21					28sep18_CZECH_m2	CZECH male	CZECH	male	Musc	M.musculus					0.203883495145631				82	0
16nov16_17mar16_G_f5_sp1_9_rev	93	3.0508	0.032659	8	16nov16_17mar16_G_f5_sp1_9_rev_8	1	0			1	19					17mar16_G_f5	G female	G	female	Dom	M.musculus					0.204301075268817				74	0
11dec17_18nov17_WSB_f1_sp1_20_rev	93	4.031	0.043378	5	11dec17_18nov17_WSB_f1_sp1_20_rev_5	1	0			1	19					18nov17_WSB_f1	WSB female	WSB	female	Dom	M.musculus					0.204301075268817				74	0
4jun19_28sep18_MOLF_m1_sp1_23_rev	88	3.5377	0.040212	13	4jun19_28sep18_MOLF_m1_sp1_23_rev_13	1	0			1	18					28sep18_MOLF_m1	MOLF male	MOLF	male	Mol	M.musculus					0.204545454545455				70	0
21nov17_16nov17_MSM_f3_sp1_12_rev	122	5.5429	0.045366	5	21nov17_16nov17_MSM_f3_sp1_12_rev_5	1	0			1	25					16nov17_MSM_f3	MSM female	MSM	female	Mol	M.musculus					0.204918032786885				97	0
10jun15_24mar15_G_m1_sp1_9_rev	63	1.5873	0.025216	3	10jun15_24mar15_G_m1_sp1_9_rev_3	1	0			1	13					24mar15_G_m1	G male	G	male	Dom	M.musculus					0.206349206349206				50	0
26jan18_11jan18_KAZ_m3_sp1_23.2_rev	63	5.0553	0.080379	13	26jan18_11jan18_KAZ_m3_sp1_23.2_rev_13	1	0			1	13					11jan18_KAZ_m3	KAZ male	KAZ	male	Musc	M.musculus					0.206349206349206				50	0
17mar15_10mar15_PWD_m1_sp1_5_rev	63	2.623	0.041697	9	17mar15_10mar15_PWD_m1_sp1_5_rev_9	1	0			1	13					10mar15_PWD_m1	PWD male	PWD	male	Musc	M.musculus					0.206349206349206				50	1
26dec17_18nov17_WSB_f4_sp1_17_rev	92	2.9032	0.03158	11	26dec17_18nov17_WSB_f4_sp1_17_rev_11	1	0			1	19					18nov17_WSB_f4	WSB female	WSB	female	Dom	M.musculus					0.206521739130435				73	0
8feb17_20dec16_LEW_m1_sp1_5_rev	82	3.4937	0.042697	8	8feb17_20dec16_LEW_m1_sp1_5_rev_8	1	0			1	17					20dec16_LEW_m1	LEW male	LEW	male	Dom	M.musculus					0.207317073170732				65	0
2aug15_8oct14_PWD_f4_sp1_7_rev	101	7.1359	0.070941	3	2aug15_8oct14_PWD_f4_sp1_7_rev_3	1	0			1	21					8oct14_PWD_f4	PWD female	PWD	female	Musc	M.musculus					0.207920792079208				80	0
11dec17_18nov17_WSB_f1_sp1_16_rev	86	3.0156	0.035262	6	11dec17_18nov17_WSB_f1_sp1_16_rev_6	1	0			1	18					18nov17_WSB_f1	WSB female	WSB	female	Dom	M.musculus					0.209302325581395				68	0
7feb18_11jan18_KAZ_f3_sp1_8_rev	124	6.163	0.049817	16	7feb18_11jan18_KAZ_f3_sp1_8_rev_16	1	0			1	26					11jan18_KAZ_f3	KAZ female	KAZ	female	Musc	M.musculus					0.209677419354839				98	0
12may15_30sep14_G_m5_sp1_2_rev	81	3.4752	0.042939	20	12may15_30sep14_G_m5_sp1_2_rev_20	1	0			1	17					30sep14_G_m5	G male	G	male	Dom	M.musculus					0.209876543209877				64	0
26jan18_11jan18_KAZ_m3_sp1_7_rev	71	3.7277	0.052223	8	26jan18_11jan18_KAZ_m3_sp1_7_rev_8	1	0			1	15					11jan18_KAZ_m3	KAZ male	KAZ	male	Musc	M.musculus					0.211267605633803				56	0
7feb18_11jan18_KAZ_m4_sp1_7_rev	66	4.895	0.073786	9	7feb18_11jan18_KAZ_m4_sp1_7_rev_9	1	0			1	14					11jan18_KAZ_m4	KAZ male	KAZ	male	Musc	M.musculus					0.212121212121212				52	0
8jun15_23apr15_PWD_f2_sp1_2_rev	122	3.141	0.025733	22	8jun15_23apr15_PWD_f2_sp1_2_rev_22	1	0			1	26					23apr15_PWD_f2	PWD female	PWD	female	Musc	M.musculus					0.213114754098361				96	0
26dec17_18nov17_WSB_f4_sp1_29_rev	122	4.6386	0.038075	11	26dec17_18nov17_WSB_f4_sp1_29_rev_11	1	0			1	26					18nov17_WSB_f4	WSB female	WSB	female	Dom	M.musculus					0.213114754098361				96	0
17nov16_17mar16_G_f1_sp1_10_rev	117	5.5759	0.0478	17	17nov16_17mar16_G_f1_sp1_10_rev_17	1	0			1	25					17mar16_G_f1	G female	G	female	Dom	M.musculus					0.213675213675214				92	0
26jan18_11jan18_KAZ_m3_sp1_23.2_rev	84	3.4375	0.040899	2	26jan18_11jan18_KAZ_m3_sp1_23.2_rev_2	1	0			1	18					11jan18_KAZ_m3	KAZ male	KAZ	male	Musc	M.musculus					0.214285714285714				66	0
8jun15_23apr15_PWD_f2_sp1_2_rev	158	5.7587	0.036468	11	8jun15_23apr15_PWD_f2_sp1_2_rev_11	1	0			1	34					23apr15_PWD_f2	PWD female	PWD	female	Musc	M.musculus					0.215189873417722				124	0
13apr15_31mar15_WSB_m2_sp1_18_rev	79	2.7692	0.035158	16	13apr15_31mar15_WSB_m2_sp1_18_rev_16	1	0			1	17					31mar15_WSB_m2	WSB male	WSB	male	Dom	M.musculus					0.215189873417722				62	0
15mar17_13jan17_LEW_f3_sp1_3_rev	111	3.1474	0.028412	18	15mar17_13jan17_LEW_f3_sp1_3_rev_18	1	0			1	24					13jan17_LEW_f3	LEW female	LEW	female	Dom	M.musculus					0.216216216216216				87	0
5jan19_27oct18_SKIVE_m2_sp1_5_rev	83	5.0746	0.061249	12	5jan19_27oct18_SKIVE_m2_sp1_5_rev_12	1	0			1	18					27oct18_SKIVE_m2	SKIVE male	SKIVE	male	Musc	M.musculus					0.216867469879518				65	1
11jan19_27oct18_SKIVE_m1_sp1_28_rev	78	2.2951	0.029512	13	11jan19_27oct18_SKIVE_m1_sp1_28_rev_13	1	0			1	17					27oct18_SKIVE_m1	SKIVE male	SKIVE	male	Musc	M.musculus					0.217948717948718				61	1
6jun18_13jan17_LEW_f2_sp1_10_rev	87	6.3502	0.073407	13	6jun18_13jan17_LEW_f2_sp1_10_rev_13	1	0			1	19					13jan17_LEW_f2	LEW female	LEW	female	Dom	M.musculus					0.218390804597701				68	0
20may15_17apr15_PWD_f4_sp1_23_rev	128	6.2074	0.048535	1	20may15_17apr15_PWD_f4_sp1_23_rev_1	1	0			1	28					17apr15_PWD_f4	PWD female	PWD	female	Musc	M.musculus					0.21875				100	0
12may15_30sep14_G_m5_sp1_18_rev	105	4.1942	0.039948	9	12may15_30sep14_G_m5_sp1_18_rev_9	1	0			1	23					30sep14_G_m5	G male	G	male	Dom	M.musculus					0.219047619047619				82	0
13sep18_28jun18_MOLF_m1_sp1_11_rev	73	3.4162	0.046571	16	13sep18_28jun18_MOLF_m1_sp1_11_rev_16	1	0			1	16					28jun18_MOLF_m1	MOLF male	MOLF	male	Mol	M.musculus					0.219178082191781				57	0
10jun19_31may19_SKIVE_f6_sp1_21_rev	82	7.3014	0.089051	1	10jun19_31may19_SKIVE_f6_sp1_21_rev_1	1	0			1	18					31may19_SKIVE_f6	SKIVE female	SKIVE	female	Musc	M.musculus					0.219512195121951				64	0
27jul19_26oct18_SKIVE_f2_sp1_27_rev	100	2.8125	0.028083	6	27jul19_26oct18_SKIVE_f2_sp1_27_rev_6	1	0			1	22					26oct18_SKIVE_f2	SKIVE female	SKIVE	female	Musc	M.musculus					0.22				78	0
12dec17_18nov17_WSB_f2_sp1_21_rev	109	3.2382	0.029685	8	12dec17_18nov17_WSB_f2_sp1_21_rev_8	1	0			1	24					18nov17_WSB_f2	WSB female	WSB	female	Dom	M.musculus					0.220183486238532				85	0
8feb17_4jan17_LEW_f1_sp1_3_rev	118	4.3596	0.037085	18	8feb17_4jan17_LEW_f1_sp1_3_rev_18	1	0			1	26				2 faint foci	4jan17_LEW_f1	LEW female	LEW	female	Dom	M.musculus					0.220338983050847				92	0
27mar16_6mar16_G_m2_sp1_8.2_rev	77	3.4375	0.044557	10	27mar16_6mar16_G_m2_sp1_8.2_rev_10	1	0			1	17					6mar16_G_m2	G male	G	male	Dom	M.musculus					0.220779220779221				60	0
20aug15_22jun15_G_m1_sp2_2.1_rev	95	3.3333	0.035134	2	20aug15_22jun15_G_m1_sp2_2.1_rev_2	1	0			1	21					22jun15_G_m1	G male	G	male	Dom	M.musculus					0.221052631578947				74	0
18sep19_19aug19_SKIVE_m3_sp1_23_rev	95	0.30303	0.003201	7	18sep19_19aug19_SKIVE_m3_sp1_23_rev_7	1	0			1	21				faint foci	19aug19_SKIVE_m3	SKIVE male	SKIVE	male	Musc	M.musculus					0.221052631578947				74	1
1mar18_1feb18_KAZ_f3_sp1_3_rev	104	3.1466	0.0303	16	1mar18_1feb18_KAZ_f3_sp1_3_rev_16	1	0			1	23					1feb18_KAZ_f3	KAZ female	KAZ	female	Musc	M.musculus					0.221153846153846				81	0
8feb18_1feb18_KAZ_f1_sp1_6_rev	104	4.8703	0.047017	12	8feb18_1feb18_KAZ_f1_sp1_6_rev_12	1	0			1	23					1feb18_KAZ_f1	KAZ female	KAZ	female	Musc	M.musculus					0.221153846153846				81	0
23jul19_28sep18_CZECH_m2_sp1_13.1_rev	72	4.4452	0.061994	11	23jul19_28sep18_CZECH_m2_sp1_13.1_rev_11	1	0			1	16					28sep18_CZECH_m2	CZECH male	CZECH	male	Musc	M.musculus					0.222222222222222				56	0
1mar18_1feb18_KAZ_f3_sp1_2_rev	90	4.7287	0.052731	10	1mar18_1feb18_KAZ_f3_sp1_2_rev_10	1	0			1	20					1feb18_KAZ_f3	KAZ female	KAZ	female	Musc	M.musculus					0.222222222222222				70	0
9aug15_17apr15_PWD_f2_sp1_22_rev	108	6.7494	0.062425	5	9aug15_17apr15_PWD_f2_sp1_22_rev_5	1	0			1	24					17apr15_PWD_f2	PWD female	PWD	female	Musc	M.musculus					0.222222222222222				84	0
7mar15_1mar15_PWD_m1_sp4_6.2_rev	72	4.5168	0.063063	4	7mar15_1mar15_PWD_m1_sp4_6.2_rev_4	1	0			1	16					1mar15_PWD_m1	PWD male	PWD	male	Musc	M.musculus					0.222222222222222				56	1
14dec17_18nov17_WSB_f3_sp1_29_rev	90	5.1152	0.056869	6	14dec17_18nov17_WSB_f3_sp1_29_rev_6	1	0			1	20					18nov17_WSB_f3	WSB female	WSB	female	Dom	M.musculus					0.222222222222222				70	0
14dec17_18nov17_WSB_f3_sp1_11_rev	103	4.8121	0.04652	11	14dec17_18nov17_WSB_f3_sp1_11_rev_11	1	0			1	23					18nov17_WSB_f3	WSB female	WSB	female	Dom	M.musculus					0.223300970873786				80	0
13sep18_28jun18_MOLF_m1_sp1_11_rev	85	2.7778	0.032575	11	13sep18_28jun18_MOLF_m1_sp1_11_rev_11	1	0			1	19					28jun18_MOLF_m1	MOLF male	MOLF	male	Mol	M.musculus					0.223529411764706				66	0
14dec17_18nov17_WSB_f3_sp1_28_rev	134	7.0515	0.052709	20	14dec17_18nov17_WSB_f3_sp1_28_rev_20	1	0			1	30				duplicate?	18nov17_WSB_f3	WSB female	WSB	female	Dom	M.musculus					0.223880597014925				104	0
8feb17_4jan17_LEW_f1_sp1_2_rev	183	1.7391	0.0095183	5	8feb17_4jan17_LEW_f1_sp1_2_rev_5	1	0			1	41					4jan17_LEW_f1	LEW female	LEW	female	Dom	M.musculus					0.224043715846995				142	0
5aug17_14jul17_MSM_f1_sp1_16_rev	116	7.7017	0.066111	27	5aug17_14jul17_MSM_f1_sp1_16_rev_27	1	0			1	26				2 faint foci	14jul17_MSM_f1	MSM female	MSM	female	Mol	M.musculus					0.224137931034483				90	0
20jul15_18may15_PWD_m1_sp1_17_rev	58	2.5613	0.044522	25	20jul15_18may15_PWD_m1_sp1_17_rev_25	1	0			1	13					18may15_PWD_m1	PWD male	PWD	male	Musc	M.musculus					0.224137931034483				45	1
10apr15_31mar15_WSB_m1_sp1_2.2_rev	80	3.171	0.039484	16	10apr15_31mar15_WSB_m1_sp1_2.2_rev_16	1	0			1	18					31mar15_WSB_m1	WSB male	WSB	male	Dom	M.musculus					0.225				62	0
14dec17_18nov17_WSB_f3_sp1_22_rev	133	2.5352	0.019045	17	14dec17_18nov17_WSB_f3_sp1_22_rev_17	1	0			1	30					18nov17_WSB_f3	WSB female	WSB	female	Dom	M.musculus					0.225563909774436				103	0
12oct18_26sep18_CZECH_m1_sp1_6.2_rev	62	2.2222	0.035907	14	12oct18_26sep18_CZECH_m1_sp1_6.2_rev_14	1	0			1	14					26sep18_CZECH_m1	CZECH male	CZECH	male	Musc	M.musculus					0.225806451612903				48	0
10jun15_18may15_WSB_m1_sp1_21_rev	93	4.7607	0.051293	10	10jun15_18may15_WSB_m1_sp1_21_rev_10	1	0			1	21					18may15_WSB_m1	WSB male	WSB	male	Dom	M.musculus					0.225806451612903				72	0
10jun15_24mar15_G_m1_sp1_31_rev	75	1.5152	0.020266	1	10jun15_24mar15_G_m1_sp1_31_rev_1	1	0			1	17					24mar15_G_m1	G male	G	male	Dom	M.musculus					0.226666666666667				58	0
14mar16_16jan16_G_f1_sp1_1_rev	79	3.6346	0.045972	19	14mar16_16jan16_G_f1_sp1_1_rev_19	1	0			1	18					16jan16_G_f1	G female	G	female	Dom	M.musculus					0.227848101265823				61	0
15mar17_13jan17_LEW_f3_sp1_33_rev	92	1.8462	0.020007	11	15mar17_13jan17_LEW_f3_sp1_33_rev_11	1	0			1	21					13jan17_LEW_f3	LEW female	LEW	female	Dom	M.musculus					0.228260869565217				71	0
30jun17_4jan17_LEW_f3_sp1_6_rev	210	6.0544	0.028833	4	30jun17_4jan17_LEW_f3_sp1_6_rev_4	1	0			1	48					4jan17_LEW_f3	LEW female	LEW	female	Dom	M.musculus					0.228571428571429				162	0
27mar16_6mar16_G_m3_sp1_13.1_rev	96	5.1643	0.053568	8	27mar16_6mar16_G_m3_sp1_13.1_rev_8	1	0			1	22					6mar16_G_m3	G male	G	male	Dom	M.musculus					0.229166666666667				74	0
15mar17_13jan17_LEW_f3_sp1_22_rev	96	5.5698	0.058249	4	15mar17_13jan17_LEW_f3_sp1_22_rev_4	1	0			1	22					13jan17_LEW_f3	LEW female	LEW	female	Dom	M.musculus					0.229166666666667				74	0
19jan17_4jan17_LEW_f6_sp1_25_rev	96	3.0986	0.032146	5	19jan17_4jan17_LEW_f6_sp1_25_rev_5	1	0			1	22					4jan17_LEW_f6	LEW female	LEW	female	Dom	M.musculus					0.229166666666667				74	0
7mar15_1mar15_PWD_m1_sp4_12_rev	100	4.4817	0.04466	10	7mar15_1mar15_PWD_m1_sp4_12_rev_10	1	0			1	23					1mar15_PWD_m1	PWD male	PWD	male	Musc	M.musculus					0.23				77	1
6jun18_13jan17_LEW_f2_sp1_16_rev	108	3.0556	0.028269	7	6jun18_13jan17_LEW_f2_sp1_16_rev_7	1	0			1	25					13jan17_LEW_f2	LEW female	LEW	female	Dom	M.musculus					0.231481481481481				83	0
19jan17_4jan17_LEW_f6_sp1_9_rev	95	1.9672	0.02076	18	19jan17_4jan17_LEW_f6_sp1_9_rev_18	1	0			1	22				faint foci below	4jan17_LEW_f6	LEW female	LEW	female	Dom	M.musculus					0.231578947368421				73	0
25jul19_28sep18_CZECH_m3_sp1_9.1_rev	69	4.7255	0.068605	11	25jul19_28sep18_CZECH_m3_sp1_9.1_rev_11	1	0			1	16					28sep18_CZECH_m3	CZECH male	CZECH	male	Musc	M.musculus					0.231884057971014				53	0
8feb18_1feb18_KAZ_f1_sp1_11_rev	86	4.718	0.055006	12	8feb18_1feb18_KAZ_f1_sp1_11_rev_12	1	0			1	20					1feb18_KAZ_f1	KAZ female	KAZ	female	Musc	M.musculus					0.232558139534884				66	0
27jul19_26oct18_SKIVE_f2_sp1_27_rev	103	6.2579	0.061026	13	27jul19_26oct18_SKIVE_f2_sp1_27_rev_13	1	0			1	24					26oct18_SKIVE_f2	SKIVE female	SKIVE	female	Musc	M.musculus					0.23300970873786409				79	0
12dec17_18nov17_WSB_f2_sp1_12_rev	64	3.4375	0.053976	1	12dec17_18nov17_WSB_f2_sp1_12_rev_1	1	0			1	15					18nov17_WSB_f2	WSB female	WSB	female	Dom	M.musculus					0.234375				49	0
26dec17_18nov17_WSB_f4_sp1_21_rev	128	4.7588	0.037277	13	26dec17_18nov17_WSB_f4_sp1_21_rev_13	1	0			1	30					18nov17_WSB_f4	WSB female	WSB	female	Dom	M.musculus					0.234375				98	0
26dec17_18nov17_WSB_f4_sp1_3_rev	192	5.0093	0.026027	5	26dec17_18nov17_WSB_f4_sp1_3_rev_5	1	0			1	45					18nov17_WSB_f4	WSB female	WSB	female	Dom	M.musculus					0.234375				147	0
19oct15_12oct15_G_m1_sp1_11.1_rev	81	5.8758	0.072341	12	19oct15_12oct15_G_m1_sp1_11.1_rev_12	1	0			1	19					12oct15_G_m1	G male	G	male	Dom	M.musculus					0.234567901234568				62	0
12jul15_12jun15_WSB_m1_sp1_13.1_rev	81	4.2857	0.053064	10	12jul15_12jun15_WSB_m1_sp1_13.1_rev_10	1	0			1	19					12jun15_WSB_m1	WSB male	WSB	male	Dom	M.musculus					0.234567901234568				62	0
6jan18_13jan17_LEW_f1_sp1_2_rev	68	3.278	0.048217	6	6jan18_13jan17_LEW_f1_sp1_2_rev_6	1	0			1	16					13jan17_LEW_f1	LEW female	LEW	female	Dom	M.musculus					0.235294117647059				52	0
7mar15_1mar15_PWD_m1_sp4_4_rev	89	3.6424	0.041048	12	7mar15_1mar15_PWD_m1_sp4_4_rev_12	1	0			1	21					1mar15_PWD_m1	PWD male	PWD	male	Musc	M.musculus					0.235955056179775				68	1
10jan18_13jan17_LEW_f1_sp1_17_rev	72	2.1212	0.0294	5	10jan18_13jan17_LEW_f1_sp1_17_rev_5	1	0			1	17					13jan17_LEW_f1	LEW female	LEW	female	Dom	M.musculus					0.236111111111111				55	0
29nov17_16nov17_MSM_f1_sp1_15.1_rev	97	5.3865	0.055357	6	29nov17_16nov17_MSM_f1_sp1_15.1_rev_6	1	0			1	23					16nov17_MSM_f1	MSM female	MSM	female	Mol	M.musculus					0.237113402061856				74	0
7mar15_1mar15_PWD_m1_sp4_1.1_rev	97	5.0619	0.052435	1	7mar15_1mar15_PWD_m1_sp4_1.1_rev_1	1	0			1	23					1mar15_PWD_m1	PWD male	PWD	male	Musc	M.musculus					0.237113402061856				74	1
27mar16_6mar16_PWD_m1_sp1_5_rev	97	4.8382	0.049788	14	27mar16_6mar16_PWD_m1_sp1_5_rev_14	1	0			1	23					6mar16_PWD_m1	PWD male	PWD	male	Musc	M.musculus					0.237113402061856				74	1
22jul19_26oct18_SKIVE_f3_sp1_22_rev	101	5.1873	0.051191	10	22jul19_26oct18_SKIVE_f3_sp1_22_rev_10	1	0			1	24					26oct18_SKIVE_f3	SKIVE female	SKIVE	female	Musc	M.musculus					0.2376237623762376				77	0
7feb18_11jan18_KAZ_m4_sp1_19_rev	84	4.8139	0.057356	7	7feb18_11jan18_KAZ_m4_sp1_19_rev_7	1	0			1	20					11jan18_KAZ_m4	KAZ male	KAZ	male	Musc	M.musculus					0.238095238095238				64	0
23jul19_28sep18_CZECH_m2_sp1_17_rev	109	4.375	0.040276	1	23jul19_28sep18_CZECH_m2_sp1_17_rev_1	1	0			1	26				faint flanking foci	28sep18_CZECH_m2	CZECH male	CZECH	male	Musc	M.musculus					0.238532110091743				83	0
27mar16_6mar16_G_m3_sp1_14_rev	67	3.6887	0.055262	11	27mar16_6mar16_G_m3_sp1_14_rev_11	1	0			1	16					6mar16_G_m3	G male	G	male	Dom	M.musculus					0.238805970149254				51	0
19jan17_4jan17_LEW_f6_sp1_24_rev	92	5.6825	0.062012	2	19jan17_4jan17_LEW_f6_sp1_24_rev_2	1	0			1	22					4jan17_LEW_f6	LEW female	LEW	female	Dom	M.musculus					0.239130434782609				70	0
26jan18_11jan18_KAZ_m3_sp1_9.1_rev	75	4.4339	0.059379	2	26jan18_11jan18_KAZ_m3_sp1_9.1_rev_2	1	0			1	18					11jan18_KAZ_m3	KAZ male	KAZ	male	Musc	M.musculus					0.24				57	0
1mar16_20feb16_G_f3_sp1_10_rev	79	3.2872	0.04171	2	1mar16_20feb16_G_f3_sp1_10_rev_2	1	0			1	19					20feb16_G_f3	G female	G	female	Dom	M.musculus					0.240506329113924				60	0
8feb18_1feb18_KAZ_f1_sp1_11_rev	79	2.5	0.03168	15	8feb18_1feb18_KAZ_f1_sp1_11_rev_15	1	0			1	19					1feb18_KAZ_f1	KAZ female	KAZ	female	Musc	M.musculus					0.240506329113924				60	0
11dec17_18nov17_WSB_f1_sp1_11_rev	83	4.404	0.05283	2	11dec17_18nov17_WSB_f1_sp1_11_rev_2	1	0			1	20					18nov17_WSB_f1	WSB female	WSB	female	Dom	M.musculus					0.240963855421687				63	0
20aug15_22jun15_G_m1_sp2_1.2_rev	112	2.5714	0.022977	4	20aug15_22jun15_G_m1_sp2_1.2_rev_4	1	0			1	27					22jun15_G_m1	G male	G	male	Dom	M.musculus					0.241071428571429				85	0
2jul17_20dec16_LEW_m3_sp1_21_rev	87	4.5413	0.052389	12	2jul17_20dec16_LEW_m3_sp1_21_rev_12	1	0			1	21					20dec16_LEW_m3	LEW male	LEW	male	Dom	M.musculus					0.241379310344828				66	0
15mar17_13jan17_LEW_f3_sp1_29_rev	95	2.1212	0.022391	10	15mar17_13jan17_LEW_f3_sp1_29_rev_10	1	0			1	23					13jan17_LEW_f3	LEW female	LEW	female	Dom	M.musculus					0.242105263157895				72	0
23jul19_28sep18_CZECH_m2_sp1_1_rev	74	7.3852	0.10037	4	23jul19_28sep18_CZECH_m2_sp1_1_rev_4	1	0			1	18					28sep18_CZECH_m2	CZECH male	CZECH	male	Musc	M.musculus					0.243243243243243				56	0
20jul15_18may15_PWD_m1_sp1_15_rev	74	7.0894	0.095681	13	20jul15_18may15_PWD_m1_sp1_15_rev_13	1	0			1	18					18may15_PWD_m1	PWD male	PWD	male	Musc	M.musculus					0.243243243243243				56	1
8jun15_23apr15_PWD_f2_sp1_2_rev	78	6.6512	0.084971	3	8jun15_23apr15_PWD_f2_sp1_2_rev_3	1	0			1	19					23apr15_PWD_f2	PWD female	PWD	female	Musc	M.musculus					0.243589743589744				59	0
1mar16_20feb16_G_f3_sp1_7_rev	86	2.6087	0.030367	7	1mar16_20feb16_G_f3_sp1_7_rev_7	1	0			1	21					20feb16_G_f3	G female	G	female	Dom	M.musculus					0.244186046511628				65	0
7mar15_1mar15_PWD_m1_sp4_22_rev	94	6.6009	0.070482	16	7mar15_1mar15_PWD_m1_sp4_22_rev_16	1	0			1	23					1mar15_PWD_m1	PWD male	PWD	male	Musc	M.musculus					0.24468085106383				71	1
17feb15_13oct14_G_f2_sp1_39_rev	98	4.7324	0.048205	3	17feb15_13oct14_G_f2_sp1_39_rev_3	1	0			1	24					13oct14_G_f2	G female	G	female	Dom	M.musculus					0.244897959183673				74	0
8feb18_1feb18_KAZ_f1_sp1_26_rev	98	2.2857	0.023355	10	8feb18_1feb18_KAZ_f1_sp1_26_rev_10	1	0			1	24					1feb18_KAZ_f1	KAZ female	KAZ	female	Musc	M.musculus					0.244897959183673				74	0
10jan18_13jan17_LEW_f1_sp1_18_rev	106	5.5536	0.052641	8	10jan18_13jan17_LEW_f1_sp1_18_rev_8	1	0			1	26					13jan17_LEW_f1	LEW female	LEW	female	Dom	M.musculus					0.245283018867925				80	0
15mar17_13jan17_LEW_f3_sp1_12_rev	106	4.2079	0.039795	17	15mar17_13jan17_LEW_f3_sp1_12_rev_17	1	0			1	26					13jan17_LEW_f3	LEW female	LEW	female	Dom	M.musculus					0.245283018867925				80	0
10jun19_31may19_SKIVE_f6_sp1_21_rev	114	4.5037	0.039364	3	10jun19_31may19_SKIVE_f6_sp1_21_rev_3	1	0			1	28					31may19_SKIVE_f6	SKIVE female	SKIVE	female	Musc	M.musculus					0.245614035087719				86	0
19jan17_4jan17_LEW_f7_sp1_3_rev	85	2.4615	0.029063	18	19jan17_4jan17_LEW_f7_sp1_3_rev_18	1	0			1	21					4jan17_LEW_f7	LEW female	LEW	female	Dom	M.musculus					0.247058823529412				64	0
12may15_30sep14_G_m5_sp1_20_rev	93	2.3881	0.025566	8	12may15_30sep14_G_m5_sp1_20_rev_8	1	0			1	23					30sep14_G_m5	G male	G	male	Dom	M.musculus					0.247311827956989				70	0
12dec17_18nov17_WSB_f2_sp1_23_rev	93	1.5385	0.016552	17	12dec17_18nov17_WSB_f2_sp1_23_rev_17	1	0			1	23					18nov17_WSB_f2	WSB female	WSB	female	Dom	M.musculus					0.247311827956989				70	0
16feb16_17mar16_G_f4_sp1_1_rev	101	3.6111	0.035642	14	16feb16_17mar16_G_f4_sp1_1_rev_14	1	0			1	25					17mar16_G_f4	G female	G	female	Dom	M.musculus					0.247524752475248				76	0
7feb18_11jan18_KAZ_m4_sp1_24_rev	121	7.6815	0.063631	9	7feb18_11jan18_KAZ_m4_sp1_24_rev_9	1	0			1	30					11jan18_KAZ_m4	KAZ male	KAZ	male	Musc	M.musculus					0.247933884297521				91	0
16feb16_17mar16_G_f4_sp1_9_rev	173	6.5775	0.037938	18	16feb16_17mar16_G_f4_sp1_9_rev_18	1	0			1	43					17mar16_G_f4	G female	G	female	Dom	M.musculus					0.248554913294798				130	0
17nov16_17mar16_G_f1_sp1_8_rev	100	7.514	0.075498	11	17nov16_17mar16_G_f1_sp1_8_rev_11	1	0			1	25					17mar16_G_f1	G female	G	female	Dom	M.musculus					0.25				75	0
8feb18_1feb18_KAZ_f1_sp1_25_rev	104	5.3422	0.051392	5	8feb18_1feb18_KAZ_f1_sp1_25_rev_5	1	0			1	26					1feb18_KAZ_f1	KAZ female	KAZ	female	Musc	M.musculus					0.25				78	0
18jul19_1mar19_MOLF_m1_sp1_21.2_rev	76	4.7516	0.062443	9	18jul19_1mar19_MOLF_m1_sp1_21.2_rev_9	1	0			1	19					1mar19_MOLF_m1	MOLF male	MOLF	male	Mol	M.musculus					0.25				57	0
12dec17_18nov17_WSB_f2_sp1_2_rev	84	4.1821	0.049881	11	12dec17_18nov17_WSB_f2_sp1_2_rev_11	1	0			1	21					18nov17_WSB_f2	WSB female	WSB	female	Dom	M.musculus					0.25				63	0
12dec17_18nov17_WSB_f2_sp1_21_rev	76	3.7088	0.048773	19	12dec17_18nov17_WSB_f2_sp1_21_rev_19	1	0			1	19					18nov17_WSB_f2	WSB female	WSB	female	Dom	M.musculus					0.25				57	0
22jul19_26oct18_SKIVE_f3_sp1_12.2_rev	108	4.4111	0.040923	24	22jul19_26oct18_SKIVE_f3_sp1_12.2_rev_24	1	0			1	27					26oct18_SKIVE_f3	SKIVE female	SKIVE	female	Musc	M.musculus					0.25				81	0
12feb15_13oct14_G_f2_sp1_10_rev	111	6.664	0.059854	15	12feb15_13oct14_G_f2_sp1_10_rev_15	1	0			1	28				twist at end, 2 more faint foci	13oct14_G_f2	G female	G	female	Dom	M.musculus					0.252252252252252				83	0
11jan19_27oct18_SKIVE_m1_sp1_29_rev	79	4.622	0.058354	3	11jan19_27oct18_SKIVE_m1_sp1_29_rev_3	1	0			1	20					27oct18_SKIVE_m1	SKIVE male	SKIVE	male	Musc	M.musculus					0.253164556962025				59	1
20jul15_18may15_PWD_m1_sp1_17_rev	75	2.1538	0.028535	14	20jul15_18may15_PWD_m1_sp1_17_rev_14	1	0			1	19					18may15_PWD_m1	PWD male	PWD	male	Musc	M.musculus					0.253333333333333				56	1
26dec17_18nov17_WSB_f4_sp1_6_rev	75	3.3333	0.044195	12	26dec17_18nov17_WSB_f4_sp1_6_rev_12	1	0			1	19					18nov17_WSB_f4	WSB female	WSB	female	Dom	M.musculus					0.253333333333333				56	0
12may15_30sep14_G_m5_sp1_12_rev	63	1.194	0.018911	4	12may15_30sep14_G_m5_sp1_12_rev_4	1	0			1	16					30sep14_G_m5	G male	G	male	Dom	M.musculus					0.253968253968254				47	0
8jun15_23apr15_PWD_f2_sp1_18_rev	110	4.822	0.043865	3	8jun15_23apr15_PWD_f2_sp1_18_rev_3	1	0			1	28					23apr15_PWD_f2	PWD female	PWD	female	Musc	M.musculus					0.254545454545455				82	0
18sep19_19aug19_SKIVE_m3_sp1_20.1_rev	55	4.192	0.076348	14	18sep19_19aug19_SKIVE_m3_sp1_20.1_rev_14	1	0			1	14					19aug19_SKIVE_m3	SKIVE male	SKIVE	male	Musc	M.musculus					0.254545454545455				41	1
2jul17_20dec16_LEW_m3_sp1_7_rev	51	7.9973	0.15729	7	2jul17_20dec16_LEW_m3_sp1_7_rev_7	1	0			1	13					20dec16_LEW_m3	LEW male	LEW	male	Dom	M.musculus					0.254901960784314				38	0
10jun15_18may15_WSB_m1_sp1_18_rev	86	6.9721	0.080646	14	10jun15_18may15_WSB_m1_sp1_18_rev_14	1	0			1	22					18may15_WSB_m1	WSB male	WSB	male	Dom	M.musculus					0.255813953488372				64	0
23jul19_28sep18_CZECH_m2_sp1_23_rev	78	6.434	0.0823	6	23jul19_28sep18_CZECH_m2_sp1_23_rev_6	1	0			1	20				faint flanking foci	28sep18_CZECH_m2	CZECH male	CZECH	male	Musc	M.musculus					0.256410256410256				58	0
15mar17_13jan17_LEW_f3_sp1_13_rev	78	1.8182	0.023358	14	15mar17_13jan17_LEW_f3_sp1_13_rev_14	1	0			1	20					13jan17_LEW_f3	LEW female	LEW	female	Dom	M.musculus					0.256410256410256				58	0
23jul19_28sep18_CZECH_m2_sp1_21_rev	74	5.3093	0.071722	12	23jul19_28sep18_CZECH_m2_sp1_21_rev_12	1	0			1	19					28sep18_CZECH_m2	CZECH male	CZECH	male	Musc	M.musculus					0.256756756756757				55	0
17nov16_17mar16_G_f1_sp1_15_rev	183	2.3881	0.013027	10	17nov16_17mar16_G_f1_sp1_15_rev_10	1	0			1	47					17mar16_G_f1	G female	G	female	Dom	M.musculus					0.256830601092896				136	0
29nov17_16nov17_MSM_f1_sp1_13_rev	109	4.7059	0.04303	17	29nov17_16nov17_MSM_f1_sp1_13_rev_17	1	0			1	28					16nov17_MSM_f1	MSM female	MSM	female	Mol	M.musculus					0.256880733944954				81	0
11dec17_18nov17_WSB_f1_sp1_22_rev	105	1.1765	0.011241	4	11dec17_18nov17_WSB_f1_sp1_22_rev_4	1	0			1	27					18nov17_WSB_f1	WSB female	WSB	female	Dom	M.musculus					0.257142857142857				78	0
26jan18_11jan18_KAZ_m3_sp1_25.1_rev	97	3.3803	0.034864	11	26jan18_11jan18_KAZ_m3_sp1_25.1_rev_11	1	0			1	25					11jan18_KAZ_m3	KAZ male	KAZ	male	Musc	M.musculus					0.257731958762887				72	0
14dec17_18nov17_WSB_f3_sp1_29_rev	97	2.7397	0.028119	7	14dec17_18nov17_WSB_f3_sp1_29_rev_7	1	0			1	25					18nov17_WSB_f3	WSB female	WSB	female	Dom	M.musculus					0.257731958762887				72	0
30jun17_4jan17_LEW_f3_sp1_8_rev	104	5.5301	0.052998	2	30jun17_4jan17_LEW_f3_sp1_8_rev_2	1	0			1	27					4jan17_LEW_f3	LEW female	LEW	female	Dom	M.musculus					0.259615384615385				77	0
23jul19_28sep18_CZECH_m2_sp1_16.1_rev	77	4.5978	0.060063	1	23jul19_28sep18_CZECH_m2_sp1_16.1_rev_1	1	0			1	20					28sep18_CZECH_m2	CZECH male	CZECH	male	Musc	M.musculus					0.25974025974026				57	0
7feb18_11jan18_KAZ_m4_sp1_8_rev	123	6.3957	0.052167	8	7feb18_11jan18_KAZ_m4_sp1_8_rev_8	1	0			1	32					11jan18_KAZ_m4	KAZ male	KAZ	male	Musc	M.musculus					0.260162601626016				91	0
12oct18_26sep18_CZECH_m1_sp1_23_rev	73	2.9412	0.040204	9	12oct18_26sep18_CZECH_m1_sp1_23_rev_9	1	0			1	19					26sep18_CZECH_m1	CZECH male	CZECH	male	Musc	M.musculus					0.26027397260274				54	0
18sep19_19aug19_SKIVE_m2_sp1_19_rev	73	3.8556	0.052979	2	18sep19_19aug19_SKIVE_m2_sp1_19_rev_2	1	0			1	19					19aug19_SKIVE_m2	SKIVE male	SKIVE	male	Musc	M.musculus					0.26027397260274				54	1
12dec17_18nov17_WSB_f2_sp1_20_rev	96	4.3725	0.045778	10	12dec17_18nov17_WSB_f2_sp1_20_rev_10	1	0			1	25					18nov17_WSB_f2	WSB female	WSB	female	Dom	M.musculus					0.260416666666667				71	0
17feb15_13oct14_G_f2_sp1_3_rev	92	3.8551	0.042095	13	17feb15_13oct14_G_f2_sp1_3_rev_13	1	0			1	24					13oct14_G_f2	G female	G	female	Dom	M.musculus					0.260869565217391				68	0
17feb15_13oct14_G_f2_sp1_3_rev	88	5.0055	0.056959	3	17feb15_13oct14_G_f2_sp1_3_rev_3	1	0			1	23					13oct14_G_f2	G female	G	female	Dom	M.musculus					0.261363636363636				65	0
13sep18_28jun18_MOLF_m1_sp1_25.1_rev	122	5.5386	0.04524	11	13sep18_28jun18_MOLF_m1_sp1_25.1_rev_11	1	0			1	32					28jun18_MOLF_m1	MOLF male	MOLF	male	Mol	M.musculus					0.262295081967213				90	0
19jan17_4jan17_LEW_f6_sp1_45_rev	80	2.9032	0.036341	9	19jan17_4jan17_LEW_f6_sp1_45_rev_9	1	0			1	21					4jan17_LEW_f6	LEW female	LEW	female	Dom	M.musculus					0.2625				59	0
27mar16_6mar16_G_m2_sp1_6.2_rev	99	3.9826	0.040153	8	27mar16_6mar16_G_m2_sp1_6.2_rev_8	1	0			1	26					6mar16_G_m2	G male	G	male	Dom	M.musculus					0.262626262626263				73	0
11dec17_18nov17_WSB_f1_sp1_15_rev	95	7.9509	0.083617	17	11dec17_18nov17_WSB_f1_sp1_15_rev_17	1	0			1	25					18nov17_WSB_f1	WSB female	WSB	female	Dom	M.musculus					0.263157894736842				70	0
12jul15_12jun15_WSB_m1_sp1_10.2_rev	95	3.8211	0.040255	21	12jul15_12jun15_WSB_m1_sp1_10.2_rev_21	1	0			1	25					12jun15_WSB_m1	WSB male	WSB	male	Dom	M.musculus					0.263157894736842				70	0
20may15_17apr15_PWD_f4_sp1_20_rev	163	2.8105	0.017253	2	20may15_17apr15_PWD_f4_sp1_20_rev_2	1	0			1	43					17apr15_PWD_f4	PWD female	PWD	female	Musc	M.musculus					0.263803680981595				120	0
27aug15_12jun15_WSB_m2_sp1_6_rev	72	0.89552	0.012483	6	27aug15_12jun15_WSB_m2_sp1_6_rev_6	1	0			1	19					12jun15_WSB_m2	WSB male	WSB	male	Dom	M.musculus					0.263888888888889				53	0
12sep19_19aug19_SKIVE_m1_sp1_3.1_rev	87	2.3881	0.027342	1	12sep19_19aug19_SKIVE_m1_sp1_3.1_rev_1	1	0			1	23					19aug19_SKIVE_m1	SKIVE male	SKIVE	male	Musc	M.musculus					0.264367816091954				64	1
23jul19_28sep18_CZECH_m2_sp1_11_rev	102	6.5588	0.06446	6	23jul19_28sep18_CZECH_m2_sp1_11_rev_6	1	0			1	27				faint foci	28sep18_CZECH_m2	CZECH male	CZECH	male	Musc	M.musculus					0.264705882352941				75	0
1mar18_1feb18_KAZ_f3_sp1_2_rev	102	5.9767	0.058504	11	1mar18_1feb18_KAZ_f3_sp1_2_rev_11	1	0			1	27					1feb18_KAZ_f3	KAZ female	KAZ	female	Musc	M.musculus					0.264705882352941				75	0
7feb18_11jan18_KAZ_m4_sp1_16.1_rev	83	2.5	0.029943	3	7feb18_11jan18_KAZ_m4_sp1_16.1_rev_3	1	0			1	22					11jan18_KAZ_m4	KAZ male	KAZ	male	Musc	M.musculus					0.265060240963855				61	0
26jan18_11jan18_KAZ_m3_sp1_1_rev	94	4.8036	0.051078	14	26jan18_11jan18_KAZ_m3_sp1_1_rev_14	1	0			1	25					11jan18_KAZ_m3	KAZ male	KAZ	male	Musc	M.musculus					0.265957446808511				69	0
9aug15_23apr15_PWD_f2_sp1_11_rev	105	3.0684	0.029121	7	9aug15_23apr15_PWD_f2_sp1_11_rev_7	1	0			1	28					23apr15_PWD_f2	PWD female	PWD	female	Musc	M.musculus					0.266666666666667				77	0
7mar15_1mar15_PWD_m1_sp4_15_rev	75	2.8986	0.038825	4	7mar15_1mar15_PWD_m1_sp4_15_rev_4	1	0			1	20					1mar15_PWD_m1	PWD male	PWD	male	Musc	M.musculus					0.266666666666667				55	1
11dec17_18nov17_WSB_f1_sp1_6_rev	90	2.8571	0.031717	10	11dec17_18nov17_WSB_f1_sp1_6_rev_10	1	0			1	24					18nov17_WSB_f1	WSB female	WSB	female	Dom	M.musculus					0.266666666666667				66	0
11dec17_18nov17_WSB_f1_sp1_6_rev	127	2.7692	0.021734	3	11dec17_18nov17_WSB_f1_sp1_6_rev_3	1	0			1	34					18nov17_WSB_f1	WSB female	WSB	female	Dom	M.musculus					0.267716535433071				93	0
1mar18_1feb18_KAZ_f3_sp1_14_rev	112	6.2075	0.055672	14	1mar18_1feb18_KAZ_f3_sp1_14_rev_14	1	0			1	30					1feb18_KAZ_f3	KAZ female	KAZ	female	Musc	M.musculus					0.267857142857143				82	0
5jan19_27oct18_SKIVE_m2_sp1_6_rev	93	4.2884	0.046225	11	5jan19_27oct18_SKIVE_m2_sp1_6_rev_11	1	0			1	25				faint foci	27oct18_SKIVE_m2	SKIVE male	SKIVE	male	Musc	M.musculus					0.268817204301075				68	1
5aug17_14jul17_MSM_f1_sp1_9_rev	130	5.4683	0.042136	1	5aug17_14jul17_MSM_f1_sp1_9_rev_1	1	0			1	35					14jul17_MSM_f1	MSM female	MSM	female	Mol	M.musculus					0.269230769230769				95	0
5jan19_27oct18_SKIVE_m2_sp1_5_rev	78	4.9326	0.06351	8	5jan19_27oct18_SKIVE_m2_sp1_5_rev_8	1	0			1	21				faint foci	27oct18_SKIVE_m2	SKIVE male	SKIVE	male	Musc	M.musculus					0.269230769230769				57	1
20jul15_18may15_PWD_m1_sp1_6_rev	63	3.0468	0.048122	13	20jul15_18may15_PWD_m1_sp1_6_rev_13	1	0			1	17					18may15_PWD_m1	PWD male	PWD	male	Musc	M.musculus					0.26984126984127				46	1
13sep18_28jun18_MOLF_m1_sp1_10.1_rev	107	7.1528	0.066999	3	13sep18_28jun18_MOLF_m1_sp1_10.1_rev_3	1	0			1	29					28jun18_MOLF_m1	MOLF male	MOLF	male	Mol	M.musculus					0.271028037383178				78	0
20may15_17apr15_PWD_f4_sp1_10_rev	81	6.3531	0.078147	17	20may15_17apr15_PWD_f4_sp1_10_rev_17	1	0			1	22					17apr15_PWD_f4	PWD female	PWD	female	Musc	M.musculus					0.271604938271605				59	0
27aug15_12jun15_WSB_m2_sp1_15_rev	103	2.6471	0.025739	3	27aug15_12jun15_WSB_m2_sp1_15_rev_3	1	0			1	28					12jun15_WSB_m2	WSB male	WSB	male	Dom	M.musculus					0.271844660194175				75	0
27jul19_26oct18_SKIVE_f1_sp1_12_rev	77	3.2702	0.042412	2	27jul19_26oct18_SKIVE_f1_sp1_12_rev_2	1	0			1	21					26oct18_SKIVE_f1	SKIVE female	SKIVE	female	Musc	M.musculus					0.2727272727272727				56	0
7feb18_11jan18_KAZ_m4_sp1_14_rev	55	4.1333	0.075295	15	7feb18_11jan18_KAZ_m4_sp1_14_rev_15	1	0			1	15					11jan18_KAZ_m4	KAZ male	KAZ	male	Musc	M.musculus					0.272727272727273				40	0
4jun19_28sep18_MOLF_m1_sp1_17.1_rev	99	5.5039	0.055414	13	4jun19_28sep18_MOLF_m1_sp1_17.1_rev_13	1	0			1	27					28sep18_MOLF_m1	MOLF male	MOLF	male	Mol	M.musculus					0.272727272727273				72	0
18jul19_31may19_SKIVE_m2_sp1_13.1_rev	44	2.636	0.05944	9	18jul19_31may19_SKIVE_m2_sp1_13.1_rev_9	1	0			1	12					31may19_SKIVE_m2	SKIVE male	SKIVE	male	Musc	M.musculus					0.272727272727273				32	1
12dec17_18nov17_WSB_f2_sp1_21_rev	88	4.7215	0.05343	15	12dec17_18nov17_WSB_f2_sp1_21_rev_15	1	0			1	24					18nov17_WSB_f2	WSB female	WSB	female	Dom	M.musculus					0.272727272727273				64	0
6jun18_13jan17_LEW_f2_sp1_11_rev	117	3.3846	0.029009	6	6jun18_13jan17_LEW_f2_sp1_11_rev_6	1	0			1	32					13jan17_LEW_f2	LEW female	LEW	female	Dom	M.musculus					0.273504273504274				85	0
11dec17_18nov17_WSB_f1_sp1_14_rev	117	2.2951	0.019656	6	11dec17_18nov17_WSB_f1_sp1_14_rev_6	1	0			1	32				another faint foci	18nov17_WSB_f1	WSB female	WSB	female	Dom	M.musculus					0.273504273504274				85	0
27mar16_6mar16_G_m1_sp1_6_rev	95	7.1989	0.075647	12	27mar16_6mar16_G_m1_sp1_6_rev_12	1	0			1	26					6mar16_G_m1	G male	G	male	Dom	M.musculus					0.273684210526316				69	0
18sep19_19aug19_SKIVE_m2_sp1_12_rev	84	3.871	0.046338	14	18sep19_19aug19_SKIVE_m2_sp1_12_rev_14	1	0			1	23				faint foci near end	19aug19_SKIVE_m2	SKIVE male	SKIVE	male	Musc	M.musculus					0.273809523809524				61	1
26jan18_11jan18_KAZ_m3_sp1_22_rev	91	4.2959	0.047189	10	26jan18_11jan18_KAZ_m3_sp1_22_rev_10	1	0			1	25					11jan18_KAZ_m3	KAZ male	KAZ	male	Musc	M.musculus					0.274725274725275				66	0
30jun17_4jan17_LEW_f3_sp1_8_rev	98	5.3359	0.054523	9	30jun17_4jan17_LEW_f3_sp1_8_rev_9	1	0			1	27					4jan17_LEW_f3	LEW female	LEW	female	Dom	M.musculus					0.275510204081633				71	0
2aug19_28sep18_MOLF_m2_sp1_18_rev	87	6.1902	0.070798	12	2aug19_28sep18_MOLF_m2_sp1_18_rev_12	1	0			1	24					28sep18_MOLF_m2	MOLF male	MOLF	male	Mol	M.musculus					0.275862068965517				63	0
8feb18_1feb18_KAZ_f1_sp1_7_rev	134	5.884	0.043874	9	8feb18_1feb18_KAZ_f1_sp1_7_rev_9	1	0			1	37					1feb18_KAZ_f1	KAZ female	KAZ	female	Musc	M.musculus					0.276119402985075				97	0
8jun15_23apr15_PWD_f2_sp1_2_rev	105	5.6428	0.05383	1	8jun15_23apr15_PWD_f2_sp1_2_rev_1	1	0			1	29					23apr15_PWD_f2	PWD female	PWD	female	Musc	M.musculus					0.276190476190476				76	0
27mar16_6mar16_G_m3_sp1_14_rev	76	4.6896	0.06156	12	27mar16_6mar16_G_m3_sp1_14_rev_12	1	0			1	21					6mar16_G_m3	G male	G	male	Dom	M.musculus					0.276315789473684				55	0
5jun18_21may18_KAZ_m2_sp1_13_rev	90	3.7166	0.041228	12	5jun18_21may18_KAZ_m2_sp1_13_rev_12	1	0			1	25					21may18_KAZ_m2	KAZ male	KAZ	male	Musc	M.musculus					0.277777777777778				65	0
6mar18_1feb18_LEW_m1_sp1_2_rev	79	9.1967	0.11701	14	6mar18_1feb18_LEW_m1_sp1_2_rev_14	1	0			1	22					1feb18_LEW_m1	LEW male	LEW	male	Dom	M.musculus					0.278481012658228				57	0
14dec17_18nov17_WSB_f3_sp1_9_rev	79	4.1495	0.052511	16	14dec17_18nov17_WSB_f3_sp1_9_rev_16	1	0			1	22					18nov17_WSB_f3	WSB female	WSB	female	Dom	M.musculus					0.278481012658228				57	0
19jan17_4jan17_LEW_f7_sp1_32_rev	86	0.58824	0.0068008	15	19jan17_4jan17_LEW_f7_sp1_32_rev_15	1	0			1	24					4jan17_LEW_f7	LEW female	LEW	female	Dom	M.musculus					0.27906976744186				62	0
8feb18_1feb18_KAZ_f1_sp1_17_rev	111	6.4512	0.058104	7	8feb18_1feb18_KAZ_f1_sp1_17_rev_7	1	0			1	31					1feb18_KAZ_f1	KAZ female	KAZ	female	Musc	M.musculus					0.279279279279279				80	0
30jun17_4jan17_LEW_f3_sp1_1_rev	111	2.5	0.022587	7	30jun17_4jan17_LEW_f3_sp1_1_rev_7	1	0			1	31					4jan17_LEW_f3	LEW female	LEW	female	Dom	M.musculus					0.279279279279279				80	0
18jul19_1mar19_MOLF_m1_sp1_9.1_rev	93	4.2725	0.045892	4	18jul19_1mar19_MOLF_m1_sp1_9.1_rev_4	1	0			1	26					1mar19_MOLF_m1	MOLF male	MOLF	male	Mol	M.musculus					0.279569892473118				67	0
9apr18_1feb18_LEW_f1_sp1_9_rev	125	3.4625	0.027603	6	9apr18_1feb18_LEW_f1_sp1_9_rev_6	1	0			1	35					1feb18_LEW_f1	LEW female	LEW	female	Dom	M.musculus					0.28				90	0
8jun15_23apr15_PWD_f2_sp1_16_rev	125	4.4008	0.035164	14	8jun15_23apr15_PWD_f2_sp1_16_rev_14	1	0			1	35					23apr15_PWD_f2	PWD female	PWD	female	Musc	M.musculus					0.28				90	0
12jul15_12jun15_WSB_m1_sp1_13.1_rev	50	4.0361	0.080498	11	12jul15_12jun15_WSB_m1_sp1_13.1_rev_11	1	0			1	14					12jun15_WSB_m1	WSB male	WSB	male	Dom	M.musculus					0.28				36	0
25jul19_28sep18_CZECH_m3_sp1_7_rev	107	7.1186	0.066597	4	25jul19_28sep18_CZECH_m3_sp1_7_rev_4	1	0			1	30					28sep18_CZECH_m3	CZECH male	CZECH	male	Musc	M.musculus					0.280373831775701				77	0
17nov16_17mar16_G_f1_sp1_8_rev	107	6.6942	0.062575	2	17nov16_17mar16_G_f1_sp1_8_rev_2	1	0			1	30					17mar16_G_f1	G female	G	female	Dom	M.musculus					0.280373831775701				77	0
10jun19_31may19_SKIVE_f6_sp1_10_rev	82	4.5098	0.054718	9	10jun19_31may19_SKIVE_f6_sp1_10_rev_9	1	0			1	23					31may19_SKIVE_f6	SKIVE female	SKIVE	female	Musc	M.musculus					0.280487804878049				59	0
12dec17_18nov17_WSB_f2_sp1_14_rev	82	2.0588	0.025157	6	12dec17_18nov17_WSB_f2_sp1_14_rev_6	1	0			1	23					18nov17_WSB_f2	WSB female	WSB	female	Dom	M.musculus					0.280487804878049				59	0
12dec17_18nov17_WSB_f2_sp1_24_rev	114	2.6866	0.023472	19	12dec17_18nov17_WSB_f2_sp1_24_rev_19	1	0			1	32					18nov17_WSB_f2	WSB female	WSB	female	Dom	M.musculus					0.280701754385965				82	0
29nov17_16nov17_MSM_f1_sp1_11_rev	89	4.4385	0.049622	5	29nov17_16nov17_MSM_f1_sp1_11_rev_5	1	0			1	25					16nov17_MSM_f1	MSM female	MSM	female	Mol	M.musculus					0.280898876404494				64	0
8jun15_23apr15_PWD_f2_sp1_10_rev	89	6.0867	0.068177	19	8jun15_23apr15_PWD_f2_sp1_10_rev_19	1	0			1	25					23apr15_PWD_f2	PWD female	PWD	female	Musc	M.musculus					0.280898876404494				64	0
6mar15_1mar15_PWD_m1_sp4_6.2_rev	89	4.9367	0.055636	9	6mar15_1mar15_PWD_m1_sp4_6.2_rev_9	1	0			1	25					1mar15_PWD_m1	PWD male	PWD	male	Musc	M.musculus					0.280898876404494				64	1
10jun19_31may19_SKIVE_f6_sp1_43_rev	64	2.6741	0.041545	20	10jun19_31may19_SKIVE_f6_sp1_43_rev_20	1	0			1	18					31may19_SKIVE_f6	SKIVE female	SKIVE	female	Musc	M.musculus					0.28125				46	0
12jul15_12jun15_WSB_m1_sp1_1_rev	85	2.4242	0.02864	2	12jul15_12jun15_WSB_m1_sp1_1_rev_2	1	0			1	24					12jun15_WSB_m1	WSB male	WSB	male	Dom	M.musculus					0.282352941176471				61	0
5jul15_23apr15_PWD_f1_sp1_18_rev	131	7.3634	0.056149	14	5jul15_23apr15_PWD_f1_sp1_18_rev_14	1	0			1	37					23apr15_PWD_f1	PWD female	PWD	female	Musc	M.musculus					0.282442748091603				94	0
27jul19_26oct18_SKIVE_f2_sp1_3.1_rev	92	3.8896	0.042328	15	27jul19_26oct18_SKIVE_f2_sp1_3.1_rev_15	1	0			1	26					26oct18_SKIVE_f2	SKIVE female	SKIVE	female	Musc	M.musculus					0.2826086956521739				66	0
8feb17_17mar16_G_f5_sp1_9_rev	99	3.3924	0.0341	12	8feb17_17mar16_G_f5_sp1_9_rev_12	1	0			1	28					17mar16_G_f5	G female	G	female	Dom	M.musculus					0.282828282828283				71	0
7feb18_11jan18_KAZ_m4_sp1_17_rev	99	3.8351	0.038868	9	7feb18_11jan18_KAZ_m4_sp1_17_rev_9	1	0			1	28					11jan18_KAZ_m4	KAZ male	KAZ	male	Musc	M.musculus					0.282828282828283				71	0
10jan18_13jan17_LEW_f1_sp1_16_rev	99	5.2036	0.052387	6	10jan18_13jan17_LEW_f1_sp1_16_rev_6	1	0			1	28					13jan17_LEW_f1	LEW female	LEW	female	Dom	M.musculus					0.282828282828283				71	0
2aug15_8oct14_PWD_f4_sp1_7_rev	106	5.8896	0.055624	15	2aug15_8oct14_PWD_f4_sp1_7_rev_15	1	0			1	30					8oct14_PWD_f4	PWD female	PWD	female	Musc	M.musculus					0.283018867924528				76	0
11jan19_27oct18_SKIVE_m1_sp1_6_rev	60	5.7747	0.096081	3	11jan19_27oct18_SKIVE_m1_sp1_6_rev_3	1	0			1	17					27oct18_SKIVE_m1	SKIVE male	SKIVE	male	Musc	M.musculus					0.283333333333333				43	1
20may15_17apr15_PWD_f4_sp1_9_rev	74	6.245	0.084419	11	20may15_17apr15_PWD_f4_sp1_9_rev_11	1	0			1	21					17apr15_PWD_f4	PWD female	PWD	female	Musc	M.musculus					0.283783783783784				53	0
26dec17_18nov17_WSB_f4_sp1_17_rev	74	4.6843	0.063108	2	26dec17_18nov17_WSB_f4_sp1_17_rev_2	1	0			1	21					18nov17_WSB_f4	WSB female	WSB	female	Dom	M.musculus					0.283783783783784				53	0
8feb17_4jan17_LEW_f1_sp1_2_rev	81	2.4615	0.030322	8	8feb17_4jan17_LEW_f1_sp1_2_rev_8	1	0			1	23					4jan17_LEW_f1	LEW female	LEW	female	Dom	M.musculus					0.283950617283951				58	0
24may17_17mar16_G_f5_sp1_8_rev	88	4.3787	0.049811	2	24may17_17mar16_G_f5_sp1_8_rev_2	1	0			1	25					17mar16_G_f5	G female	G	female	Dom	M.musculus					0.284090909090909				63	0
8feb18_1feb18_KAZ_f1_sp1_11_rev	102	1.9718	0.019394	5	8feb18_1feb18_KAZ_f1_sp1_11_rev_5	1	0			1	29					1feb18_KAZ_f1	KAZ female	KAZ	female	Musc	M.musculus					0.284313725490196				73	0
27jul19_26oct18_SKIVE_f1_sp1_19_rev	102	6.0287	0.059383	11	27jul19_26oct18_SKIVE_f1_sp1_19_rev_11	1	0			1	29					26oct18_SKIVE_f1	SKIVE female	SKIVE	female	Musc	M.musculus					0.28431372549019607				73	0
5jun18_21may18_KAZ_m2_sp1_8.2_rev	116	3.8806	0.033464	1	5jun18_21may18_KAZ_m2_sp1_8.2_rev_1	1	0			1	33					21may18_KAZ_m2	KAZ male	KAZ	male	Musc	M.musculus					0.28448275862069				83	0
15mar17_13jan17_LEW_f3_sp1_33_rev	105	3.2836	0.031226	21	15mar17_13jan17_LEW_f3_sp1_33_rev_21	1	0			1	30					13jan17_LEW_f3	LEW female	LEW	female	Dom	M.musculus					0.285714285714286				75	0
8jun15_23apr15_PWD_f2_sp1_15_rev	91	6.0893	0.066955	4	8jun15_23apr15_PWD_f2_sp1_15_rev_4	1	0			1	26					23apr15_PWD_f2	PWD female	PWD	female	Musc	M.musculus					0.285714285714286				65	0
12jul15_12jun15_WSB_m1_sp1_3_rev	56	4.1854	0.074771	19	12jul15_12jun15_WSB_m1_sp1_3_rev_19	1	0			1	16					12jun15_WSB_m1	WSB male	WSB	male	Dom	M.musculus					0.285714285714286				40	0
10jun19_31may19_SKIVE_f6_sp1_21_rev	108	5.4446	0.050419	21	10jun19_31may19_SKIVE_f6_sp1_21_rev_21	1	0			1	31					31may19_SKIVE_f6	SKIVE female	SKIVE	female	Musc	M.musculus					0.287037037037037				77	0
19jan17_4jan17_LEW_f7_sp1_4_rev	94	2.9032	0.031013	4	19jan17_4jan17_LEW_f7_sp1_4_rev_4	1	0			1	27					4jan17_LEW_f7	LEW female	LEW	female	Dom	M.musculus					0.287234042553192				67	0
5aug17_14jul17_MSM_f1_sp1_12_rev	94	6.8146	0.072735	24	5aug17_14jul17_MSM_f1_sp1_12_rev_24	1	0			1	27					14jul17_MSM_f1	MSM female	MSM	female	Mol	M.musculus					0.287234042553192				67	0
2aug19_28sep18_MOLF_m2_sp1_16_rev	59	4.3232	0.073357	10	2aug19_28sep18_MOLF_m2_sp1_16_rev_10	1	0			1	17					28sep18_MOLF_m2	MOLF male	MOLF	male	Mol	M.musculus					0.288135593220339				42	0
8feb17_20dec16_LEW_m1_sp1_15.1_rev	52	4.3908	0.084081	18	8feb17_20dec16_LEW_m1_sp1_15.1_rev_18	1	0			1	15					20dec16_LEW_m1	LEW male	LEW	male	Dom	M.musculus					0.288461538461538				37	0
1mar18_1feb18_KAZ_f3_sp1_14_rev	83	3.125	0.037719	8	1mar18_1feb18_KAZ_f3_sp1_14_rev_8	1	0			1	24					1feb18_KAZ_f3	KAZ female	KAZ	female	Musc	M.musculus					0.289156626506024				59	0
20jul15_18may15_PWD_m1_sp1_22_rev	76	4.5625	0.060186	3	20jul15_18may15_PWD_m1_sp1_22_rev_3	1	0			1	22					18may15_PWD_m1	PWD male	PWD	male	Musc	M.musculus					0.289473684210526				54	1
27aug15_12jun15_WSB_m2_sp1_6_rev	69	2.6667	0.038645	17	27aug15_12jun15_WSB_m2_sp1_6_rev_17	1	0			1	20					12jun15_WSB_m2	WSB male	WSB	male	Dom	M.musculus					0.289855072463768				49	0
27mar16_6mar16_G_m3_sp1_15.3_rev	93	4.2447	0.045603	8	27mar16_6mar16_G_m3_sp1_15.3_rev_8	1	0			1	27					6mar16_G_m3	G male	G	male	Dom	M.musculus					0.290322580645161				66	0
8feb18_1feb18_KAZ_f1_sp1_28_rev	96	3.4921	0.036437	3	8feb18_1feb18_KAZ_f1_sp1_28_rev_3	1	0			1	28					1feb18_KAZ_f1	KAZ female	KAZ	female	Musc	M.musculus					0.291666666666667				68	0
18jul19_31may19_SKIVE_m2_sp1_8_rev	48	3.6364	0.076498	8	18jul19_31may19_SKIVE_m2_sp1_8_rev_8	1	0			1	14					31may19_SKIVE_m2	SKIVE male	SKIVE	male	Musc	M.musculus					0.291666666666667				34	1
11dec17_18nov17_WSB_f1_sp1_4_rev	96	4.609	0.047933	5	11dec17_18nov17_WSB_f1_sp1_4_rev_5	1	0			1	28					18nov17_WSB_f1	WSB female	WSB	female	Dom	M.musculus					0.291666666666667				68	0
27mar16_6mar16_G_m3_sp1_1_rev	65	3.4666	0.053571	2	27mar16_6mar16_G_m3_sp1_1_rev_2	1	0			1	19					6mar16_G_m3	G male	G	male	Dom	M.musculus					0.292307692307692				46	0
8feb18_1feb18_KAZ_f1_sp1_6_rev	82	3.4378	0.041992	22	8feb18_1feb18_KAZ_f1_sp1_6_rev_22	1	0			1	24					1feb18_KAZ_f1	KAZ female	KAZ	female	Musc	M.musculus					0.292682926829268				58	0
2aug19_28sep18_MOLF_m2_sp1_22_rev	82	8.3836	0.10199	9	2aug19_28sep18_MOLF_m2_sp1_22_rev_9	1	0			1	24					28sep18_MOLF_m2	MOLF male	MOLF	male	Mol	M.musculus					0.292682926829268				58	0
18jul19_1mar19_MOLF_m1_sp1_19.1_rev	58	6.9216	0.11957	15	18jul19_1mar19_MOLF_m1_sp1_19.1_rev_15	1	0			1	17					1mar19_MOLF_m1	MOLF male	MOLF	male	Mol	M.musculus					0.293103448275862				41	0
27jul19_26oct18_SKIVE_f1_sp1_24_rev	58	2.5	0.043373	20	27jul19_26oct18_SKIVE_f1_sp1_24_rev_20	1	0			1	17					26oct18_SKIVE_f1	SKIVE female	SKIVE	female	Musc	M.musculus					0.29310344827586204				41	0
4dec17_16nov17_MSM_f2_sp1_32_rev	160	3.1884	0.01989	5	4dec17_16nov17_MSM_f2_sp1_32_rev_5	1	0			1	47					16nov17_MSM_f2	MSM female	MSM	female	Mol	M.musculus					0.29375				113	0
24may17_17mar16_G_f5_sp1_11_rev	102	2.5806	0.025321	9	24may17_17mar16_G_f5_sp1_11_rev_9	1	0			1	30					17mar16_G_f5	G female	G	female	Dom	M.musculus					0.294117647058824				72	0
7feb18_11jan18_KAZ_m4_sp1_10_rev	119	6.9314	0.058188	8	7feb18_11jan18_KAZ_m4_sp1_10_rev_8	1	0			1	35					11jan18_KAZ_m4	KAZ male	KAZ	male	Musc	M.musculus					0.294117647058824				84	0
5aug17_14jul17_MSM_f1_sp1_24_rev	102	5.4889	0.053817	8	5aug17_14jul17_MSM_f1_sp1_24_rev_8	1	0			1	30					14jul17_MSM_f1	MSM female	MSM	female	Mol	M.musculus					0.294117647058824				72	0
7mar15_1mar15_PWD_m1_sp4_12_rev	85	4.1765	0.049082	12	7mar15_1mar15_PWD_m1_sp4_12_rev_12	1	0			1	25					1mar15_PWD_m1	PWD male	PWD	male	Musc	M.musculus					0.294117647058824				60	1
30jun17_4jan17_LEW_f3_sp1_3_rev	112	4.2181	0.03754	5	30jun17_4jan17_LEW_f3_sp1_3_rev_5	1	0			1	33					4jan17_LEW_f3	LEW female	LEW	female	Dom	M.musculus					0.294642857142857				79	0
26dec17_18nov17_WSB_f4_sp1_22_rev	95	6.4475	0.068008	2	26dec17_18nov17_WSB_f4_sp1_22_rev_2	1	0			1	28					18nov17_WSB_f4	WSB female	WSB	female	Dom	M.musculus					0.294736842105263				67	0
12jul15_12jun15_WSB_m1_sp1_4.2_rev	71	3.1884	0.044924	16	12jul15_12jun15_WSB_m1_sp1_4.2_rev_16	1	0			1	21					12jun15_WSB_m1	WSB male	WSB	male	Dom	M.musculus					0.295774647887324				50	0
13sep18_28jun18_MOLF_m1_sp1_11_rev	81	5.8633	0.072568	13	13sep18_28jun18_MOLF_m1_sp1_11_rev_13	1	0			1	24				2 other faint foci	28jun18_MOLF_m1	MOLF male	MOLF	male	Mol	M.musculus					0.296296296296296				57	0
4jun19_28sep18_MOLF_m1_sp1_6_rev	108	2.1875	0.020323	2	4jun19_28sep18_MOLF_m1_sp1_6_rev_2	1	0			1	32					28sep18_MOLF_m1	MOLF male	MOLF	male	Mol	M.musculus					0.296296296296296				76	0
11dec17_18nov17_WSB_f1_sp1_21_rev	108	3.0986	0.028671	7	11dec17_18nov17_WSB_f1_sp1_21_rev_7	1	0			1	32					18nov17_WSB_f1	WSB female	WSB	female	Dom	M.musculus					0.296296296296296				76	0
20may15_17apr15_PWD_f4_sp1_11_rev	145	4.0427	0.027832	12	20may15_17apr15_PWD_f4_sp1_11_rev_12	1	0			1	43					17apr15_PWD_f4	PWD female	PWD	female	Musc	M.musculus					0.296551724137931				102	0
19oct15_12oct15_G_m1_sp1_9_rev	84	3.356	0.040067	11	19oct15_12oct15_G_m1_sp1_9_rev_11	1	0			1	25					12oct15_G_m1	G male	G	male	Dom	M.musculus					0.297619047619048				59	0
24may17_17mar16_G_f5_sp1_11_rev	94	4.6335	0.04919	7	24may17_17mar16_G_f5_sp1_11_rev_7	1	0			1	28					17mar16_G_f5	G female	G	female	Dom	M.musculus					0.297872340425532				66	0
2jul17_20dec16_LEW_m2_sp1_1_rev	94	4.3712	0.046682	16	2jul17_20dec16_LEW_m2_sp1_1_rev_16	1	0			1	28					20dec16_LEW_m2	LEW male	LEW	male	Dom	M.musculus					0.297872340425532				66	0
6mar18_1feb18_LEW_m1_sp1_17_rev	94	4.6275	0.049172	15	6mar18_1feb18_LEW_m1_sp1_17_rev_15	1	0			1	28					1feb18_LEW_m1	LEW male	LEW	male	Dom	M.musculus					0.297872340425532				66	0
8jun15_23apr15_PWD_f2_sp1_10_rev	94	6.7918	0.072328	15	8jun15_23apr15_PWD_f2_sp1_10_rev_15	1	0			1	28					23apr15_PWD_f2	PWD female	PWD	female	Musc	M.musculus					0.297872340425532				66	0
18jul19_1mar19_MOLF_m1_sp1_17_rev	57	4.6974	0.081991	11	18jul19_1mar19_MOLF_m1_sp1_17_rev_11	1	0			1	17					1mar19_MOLF_m1	MOLF male	MOLF	male	Mol	M.musculus					0.298245614035088				40	0
11jan19_27oct18_SKIVE_m1_sp1_23.1_rev	67	3.0303	0.04553	1	11jan19_27oct18_SKIVE_m1_sp1_23.1_rev_1	1	0			1	20					27oct18_SKIVE_m1	SKIVE male	SKIVE	male	Musc	M.musculus					0.298507462686567				47	1
5jun18_21may18_KAZ_m2_sp1_9.2_rev	77	2.9398	0.038326	5	5jun18_21may18_KAZ_m2_sp1_9.2_rev_5	1	0			1	23					21may18_KAZ_m2	KAZ male	KAZ	male	Musc	M.musculus					0.298701298701299				54	0
29nov17_16nov17_MSM_f1_sp1_28_rev	97	3.2791	0.033866	6	29nov17_16nov17_MSM_f1_sp1_28_rev_6	1	0			1	29					16nov17_MSM_f1	MSM female	MSM	female	Mol	M.musculus					0.298969072164948				68	0
17nov16_17mar16_G_f1_sp1_12_rev	117	7.8953	0.067314	15	17nov16_17mar16_G_f1_sp1_12_rev_15	1	0			1	35					17mar16_G_f1	G female	G	female	Dom	M.musculus					0.299145299145299				82	0
26jan18_11jan18_KAZ_m3_sp1_16_rev	70	4.6884	0.067399	16	26jan18_11jan18_KAZ_m3_sp1_16_rev_16	1	0			1	21					11jan18_KAZ_m3	KAZ male	KAZ	male	Musc	M.musculus					0.3				49	0
5jan19_27oct18_SKIVE_m2_sp1_3.1_rev	60	2.8571	0.047803	14	5jan19_27oct18_SKIVE_m2_sp1_3.1_rev_14	1	0			1	18					27oct18_SKIVE_m2	SKIVE male	SKIVE	male	Musc	M.musculus					0.3				42	1
11dec17_18nov17_WSB_f1_sp1_15_rev	110	1.1765	0.010647	4	11dec17_18nov17_WSB_f1_sp1_15_rev_4	1	0			1	33					18nov17_WSB_f1	WSB female	WSB	female	Dom	M.musculus					0.3				77	0
12dec17_18nov17_WSB_f2_sp1_5_rev	90	3.871	0.042873	3	12dec17_18nov17_WSB_f2_sp1_5_rev_3	1	0			1	27					18nov17_WSB_f2	WSB female	WSB	female	Dom	M.musculus					0.3				63	0
26dec17_18nov17_WSB_f4_sp1_9_rev	150	4.8036	0.032092	2	26dec17_18nov17_WSB_f4_sp1_9_rev_2	1	0			1	45					18nov17_WSB_f4	WSB female	WSB	female	Dom	M.musculus					0.3				105	0
27jul19_26oct18_SKIVE_f1_sp1_19_rev	90	3.2799	0.036358	19	27jul19_26oct18_SKIVE_f1_sp1_19_rev_19	1	0			1	27					26oct18_SKIVE_f1	SKIVE female	SKIVE	female	Musc	M.musculus					0.3				63	0
21nov17_16nov17_MSM_f3_sp1_1_rev	113	3.6923	0.032691	3	21nov17_16nov17_MSM_f3_sp1_1_rev_3	1	0			1	34					16nov17_MSM_f3	MSM female	MSM	female	Mol	M.musculus					0.300884955752212				79	0
5aug17_14jul17_MSM_f1_sp1_13_rev	103	4.9567	0.048279	20	5aug17_14jul17_MSM_f1_sp1_13_rev_20	1	0			1	31					14jul17_MSM_f1	MSM female	MSM	female	Mol	M.musculus					0.300970873786408				72	0
2jul17_20dec16_LEW_m2_sp1_13_rev	83	2.9592	0.035737	4	2jul17_20dec16_LEW_m2_sp1_13_rev_4	1	0			1	25					20dec16_LEW_m2	LEW male	LEW	male	Dom	M.musculus					0.301204819277108				58	0
15mar17_13jan17_LEW_f3_sp1_30_rev	83	4.6832	0.056205	18	15mar17_13jan17_LEW_f3_sp1_30_rev_18	1	0			1	25					13jan17_LEW_f3	LEW female	LEW	female	Dom	M.musculus					0.301204819277108				58	0
19jan17_4jan17_LEW_f6_sp1_28_rev	83	4.3539	0.052286	19	19jan17_4jan17_LEW_f6_sp1_28_rev_19	1	0			1	25					4jan17_LEW_f6	LEW female	LEW	female	Dom	M.musculus					0.301204819277108				58	0
9aug15_23apr15_PWD_f2_sp1_7_rev	156	13.5892	0.087145	4	9aug15_23apr15_PWD_f2_sp1_7_rev_4	1	0			1	47					23apr15_PWD_f2	PWD female	PWD	female	Musc	M.musculus					0.301282051282051				109	0
20may15_17apr15_PWD_f4_sp1_14_rev	146	4.6473	0.031765	14	20may15_17apr15_PWD_f4_sp1_14_rev_14	1	0			1	44				2 faint foci on latter part	17apr15_PWD_f4	PWD female	PWD	female	Musc	M.musculus					0.301369863013699				102	0
16feb18_1feb18_KAZ_f4_sp1_25_rev	116	5.2097	0.044899	8	16feb18_1feb18_KAZ_f4_sp1_25_rev_8	1	0			1	35					1feb18_KAZ_f4	KAZ female	KAZ	female	Musc	M.musculus					0.301724137931034				81	0
27mar16_6mar16_G_m2_sp1_5.2_rev	106	3.8557	0.036527	5	27mar16_6mar16_G_m2_sp1_5.2_rev_5	1	0			1	32					6mar16_G_m2	G male	G	male	Dom	M.musculus					0.30188679245283				74	0
9apr18_1feb18_LEW_f1_sp1_9_rev	159	2.6471	0.016648	15	9apr18_1feb18_LEW_f1_sp1_9_rev_15	1	0			1	48					1feb18_LEW_f1	LEW female	LEW	female	Dom	M.musculus					0.30188679245283				111	0
15mar17_13jan17_LEW_f3_sp1_15_rev	76	2.9851	0.039458	12	15mar17_13jan17_LEW_f3_sp1_15_rev_12	1	0			1	23					13jan17_LEW_f3	LEW female	LEW	female	Dom	M.musculus					0.302631578947368				53	0
19jan17_4jan17_LEW_f7_sp1_9_rev	109	4.1644	0.038052	11	19jan17_4jan17_LEW_f7_sp1_9_rev_11	1	0			1	33					4jan17_LEW_f7	LEW female	LEW	female	Dom	M.musculus					0.302752293577982				76	0
8feb18_1feb18_KAZ_f1_sp1_30_rev	99	2.2581	0.022881	9	8feb18_1feb18_KAZ_f1_sp1_30_rev_9	1	0			1	30					1feb18_KAZ_f1	KAZ female	KAZ	female	Musc	M.musculus					0.303030303030303				69	0
1mar18_1feb18_KAZ_f3_sp1_2_rev	122	4.8354	0.039478	6	1mar18_1feb18_KAZ_f3_sp1_2_rev_6	1	0			1	37					1feb18_KAZ_f3	KAZ female	KAZ	female	Musc	M.musculus					0.30327868852459				85	0
1mar16_20feb16_G_f3_sp1_14_rev	56	2.2811	0.040546	16	1mar16_20feb16_G_f3_sp1_14_rev_16	1	0			1	17					20feb16_G_f3	G female	G	female	Dom	M.musculus					0.303571428571429				39	0
6jun18_13jan17_LEW_f2_sp1_1_rev	112	4.5966	0.041141	21	6jun18_13jan17_LEW_f2_sp1_1_rev_21	1	0			1	34					13jan17_LEW_f2	LEW female	LEW	female	Dom	M.musculus					0.303571428571429				78	0
8jun15_23apr15_PWD_f2_sp1_3_rev	102	1.8108	0.01775	18	8jun15_23apr15_PWD_f2_sp1_3_rev_18	1	0			1	31					23apr15_PWD_f2	PWD female	PWD	female	Musc	M.musculus					0.303921568627451				71	0
25jul19_28sep18_CZECH_m3_sp1_14_rev	115	5.2098	0.045304	10	25jul19_28sep18_CZECH_m3_sp1_14_rev_10	1	0			1	35					28sep18_CZECH_m3	CZECH male	CZECH	male	Musc	M.musculus					0.304347826086957				80	0
2jul17_20dec16_LEW_m2_sp1_4_rev	69	3.5813	0.051744	4	2jul17_20dec16_LEW_m2_sp1_4_rev_4	1	0			1	21					20dec16_LEW_m2	LEW male	LEW	male	Dom	M.musculus					0.304347826086957				48	0
6mar18_1feb18_LEW_m1_sp1_2_rev	69	3.8889	0.056092	8	6mar18_1feb18_LEW_m1_sp1_2_rev_8	1	0			1	21					1feb18_LEW_m1	LEW male	LEW	male	Dom	M.musculus					0.304347826086957				48	0
18jul19_1mar19_MOLF_m1_sp1_22_rev	128	2.4475	0.019188	2	18jul19_1mar19_MOLF_m1_sp1_22_rev_2	1	0			1	39					1mar19_MOLF_m1	MOLF male	MOLF	male	Mol	M.musculus					0.3046875				89	0
22jul19_26oct18_SKIVE_f3_sp1_14.1_rev	82	4.865	0.059071	7	22jul19_26oct18_SKIVE_f3_sp1_14.1_rev_7	1	0			1	25					26oct18_SKIVE_f3	SKIVE female	SKIVE	female	Musc	M.musculus					0.3048780487804878				57	0
5jul15_23apr15_PWD_f1_sp1_16_rev	118	6.897	0.058472	16	5jul15_23apr15_PWD_f1_sp1_16_rev_16	1	0			1	36					23apr15_PWD_f1	PWD female	PWD	female	Musc	M.musculus					0.305084745762712				82	0
27mar16_6mar16_G_m3_sp1_15.3_rev	72	4.4141	0.06096	6	27mar16_6mar16_G_m3_sp1_15.3_rev_6	1	0			1	22					6mar16_G_m3	G male	G	male	Dom	M.musculus					0.305555555555556				50	0
1mar18_1feb18_KAZ_f3_sp1_1_rev	85	2.3529	0.027677	16	1mar18_1feb18_KAZ_f3_sp1_1_rev_16	1	0			1	26					1feb18_KAZ_f3	KAZ female	KAZ	female	Musc	M.musculus					0.305882352941176				59	0
18jul19_1mar19_MOLF_m1_sp1_30.2_rev	85	6.3336	0.074561	8	18jul19_1mar19_MOLF_m1_sp1_30.2_rev_8	1	0			1	26					1mar19_MOLF_m1	MOLF male	MOLF	male	Mol	M.musculus					0.305882352941176				59	0
5aug17_14jul17_MSM_f1_sp1_10_rev	85	1.2903	0.015269	6	5aug17_14jul17_MSM_f1_sp1_10_rev_6	1	0			1	26					14jul17_MSM_f1	MSM female	MSM	female	Mol	M.musculus					0.305882352941176				59	0
17nov16_17mar16_G_f1_sp1_14_rev	134	3.9745	0.029734	5	17nov16_17mar16_G_f1_sp1_14_rev_5	1	0			1	41				2 other faint foci	17mar16_G_f1	G female	G	female	Dom	M.musculus					0.305970149253731				93	0
8feb17_20dec16_LEW_m1_sp1_15.1_rev	49	6.2899	0.12964	13	8feb17_20dec16_LEW_m1_sp1_15.1_rev_13	1	0			1	15					20dec16_LEW_m1	LEW male	LEW	male	Dom	M.musculus					0.306122448979592				34	0
2aug19_28sep18_MOLF_m2_sp1_9_rev	62	2.5	0.040038	7	2aug19_28sep18_MOLF_m2_sp1_9_rev_7	1	0			1	19					28sep18_MOLF_m2	MOLF male	MOLF	male	Mol	M.musculus					0.306451612903226				43	0
27jul19_26oct18_SKIVE_f1_sp1_12_rev	88	3.9569	0.04483	6	27jul19_26oct18_SKIVE_f1_sp1_12_rev_6	1	0			1	27					26oct18_SKIVE_f1	SKIVE female	SKIVE	female	Musc	M.musculus					0.3068181818181818				61	0
8feb18_1feb18_KAZ_f1_sp1_26_rev	117	7.0428	0.060387	15	8feb18_1feb18_KAZ_f1_sp1_26_rev_15	1	0			1	36					1feb18_KAZ_f1	KAZ female	KAZ	female	Musc	M.musculus					0.307692307692308				81	0
5jun18_21may18_KAZ_m2_sp1_15.2_rev	78	4.5956	0.05864	7	5jun18_21may18_KAZ_m2_sp1_15.2_rev_7	1	0			1	24					21may18_KAZ_m2	KAZ male	KAZ	male	Musc	M.musculus					0.307692307692308				54	0
7feb18_11jan18_KAZ_m4_sp1_19_rev	65	4.4689	0.068343	19	7feb18_11jan18_KAZ_m4_sp1_19_rev_19	1	0			1	20					11jan18_KAZ_m4	KAZ male	KAZ	male	Musc	M.musculus					0.307692307692308				45	0
21nov17_16nov17_MSM_f3_sp1_9_rev	120	3.765	0.031316	9	21nov17_16nov17_MSM_f3_sp1_9_rev_9	1	0			1	37					16nov17_MSM_f3	MSM female	MSM	female	Mol	M.musculus					0.308333333333333				83	0
9aug15_23apr15_PWD_f2_sp1_6_rev	97	4.8822	0.050254	3	9aug15_23apr15_PWD_f2_sp1_6_rev_3	1	0			1	30					23apr15_PWD_f2	PWD female	PWD	female	Musc	M.musculus					0.309278350515464				67	0
5aug17_14jul17_MSM_f1_sp1_21_rev	113	8.4357	0.074599	9	5aug17_14jul17_MSM_f1_sp1_21_rev_9	1	0			1	35					14jul17_MSM_f1	MSM female	MSM	female	Mol	M.musculus					0.309734513274336				78	0
8feb18_1feb18_KAZ_f1_sp1_28_rev	129	5.7892	0.044859	16	8feb18_1feb18_KAZ_f1_sp1_28_rev_16	1	0			1	40					1feb18_KAZ_f1	KAZ female	KAZ	female	Musc	M.musculus					0.310077519379845				89	0
27jul19_26oct18_SKIVE_f1_sp1_25_rev	58	4.1947	0.072265	18	27jul19_26oct18_SKIVE_f1_sp1_25_rev_18	1	0			1	18					26oct18_SKIVE_f1	SKIVE female	SKIVE	female	Musc	M.musculus					0.3103448275862069				40	0
29nov17_16nov17_MSM_f1_sp1_27_rev	87	2.8571	0.032937	7	29nov17_16nov17_MSM_f1_sp1_27_rev_7	1	0			1	27					16nov17_MSM_f1	MSM female	MSM	female	Mol	M.musculus					0.310344827586207				60	0
8jun15_23apr15_PWD_f2_sp1_12_rev	90	8.3544	0.092989	11	8jun15_23apr15_PWD_f2_sp1_12_rev_11	1	0			1	28					23apr15_PWD_f2	PWD female	PWD	female	Musc	M.musculus					0.311111111111111				62	0
10jun19_31may19_SKIVE_f6_sp1_10_rev	106	2.0588	0.019366	11	10jun19_31may19_SKIVE_f6_sp1_10_rev_11	1	0			1	33					31may19_SKIVE_f6	SKIVE female	SKIVE	female	Musc	M.musculus					0.311320754716981				73	0
9aug15_17apr15_PWD_f2_sp1_3.2_rev	61	4.7576	0.077379	1	9aug15_17apr15_PWD_f2_sp1_3.2_rev_1	1	0			1	19					17apr15_PWD_f2	PWD female	PWD	female	Musc	M.musculus					0.311475409836066				42	0
19may15_31mar15_WSB_m1_sp1_8_rev	61	1.8462	0.030041	18	19may15_31mar15_WSB_m1_sp1_8_rev_18	1	0			1	19				centromere foci	31mar15_WSB_m1	WSB male	WSB	male	Dom	M.musculus					0.311475409836066				42	0
26jan18_11jan18_KAZ_m3_sp1_1_rev	77	4.1938	0.05453	18	26jan18_11jan18_KAZ_m3_sp1_1_rev_18	1	0			1	24					11jan18_KAZ_m3	KAZ male	KAZ	male	Musc	M.musculus					0.311688311688312				53	0
7feb18_11jan18_KAZ_m4_sp1_28_rev	80	4.5455	0.056715	6	7feb18_11jan18_KAZ_m4_sp1_28_rev_6	1	0			1	25					11jan18_KAZ_m4	KAZ male	KAZ	male	Musc	M.musculus					0.3125				55	0
6jun18_13jan17_LEW_f2_sp1_1_rev	64	2.5818	0.040605	13	6jun18_13jan17_LEW_f2_sp1_1_rev_13	1	0			1	20					13jan17_LEW_f2	LEW female	LEW	female	Dom	M.musculus					0.3125				44	0
18jul19_31may19_SKIVE_m2_sp1_24_rev	80	2.9032	0.036481	12	18jul19_31may19_SKIVE_m2_sp1_24_rev_12	1	0			1	25					31may19_SKIVE_m2	SKIVE male	SKIVE	male	Musc	M.musculus					0.3125				55	1
19may15_31mar15_WSB_m1_sp1_21.1_rev	96	2.4242	0.02513	14	19may15_31mar15_WSB_m1_sp1_21.1_rev_14	1	0			1	30					31mar15_WSB_m1	WSB male	WSB	male	Dom	M.musculus					0.3125				66	0
26dec17_18nov17_WSB_f4_sp1_16_rev	112	4.1791	0.037275	8	26dec17_18nov17_WSB_f4_sp1_16_rev_8	1	0			1	35					18nov17_WSB_f4	WSB female	WSB	female	Dom	M.musculus					0.3125				77	0
9aug15_23apr15_PWD_f2_sp1_1_rev	115	9.3235	0.080941	3	9aug15_23apr15_PWD_f2_sp1_1_rev_3	1	0			1	36					23apr15_PWD_f2	PWD female	PWD	female	Musc	M.musculus					0.31304347826087				79	0
29nov17_16nov17_MSM_f1_sp1_27_rev	99	1.5385	0.015585	6	29nov17_16nov17_MSM_f1_sp1_27_rev_6	1	0			1	31					16nov17_MSM_f1	MSM female	MSM	female	Mol	M.musculus					0.313131313131313				68	0
12dec17_18nov17_WSB_f2_sp1_4_rev	99	4.1887	0.042285	12	12dec17_18nov17_WSB_f2_sp1_4_rev_12	1	0			1	31					18nov17_WSB_f2	WSB female	WSB	female	Dom	M.musculus					0.313131313131313				68	0
4jun19_28sep18_MOLF_m1_sp1_31_rev	83	7.0277	0.084523	2	4jun19_28sep18_MOLF_m1_sp1_31_rev_2	1	0			1	26					28sep18_MOLF_m1	MOLF male	MOLF	male	Mol	M.musculus					0.313253012048193				57	0
18sep19_19aug19_SKIVE_m2_sp1_21_rev	67	2.7273	0.040489	13	18sep19_19aug19_SKIVE_m2_sp1_21_rev_13	1	0			1	21					19aug19_SKIVE_m2	SKIVE male	SKIVE	male	Musc	M.musculus					0.313432835820896				46	1
14dec17_18nov17_WSB_f3_sp1_6_rev	102	6.498	0.063611	3	14dec17_18nov17_WSB_f3_sp1_6_rev_3	1	0			1	32					18nov17_WSB_f3	WSB female	WSB	female	Dom	M.musculus					0.313725490196078				70	0
7mar15_1mar15_PWD_m1_sp4_1.2_rev	86	6.4435	0.075294	9	7mar15_1mar15_PWD_m1_sp4_1.2_rev_9	1	0			1	27					1mar15_PWD_m1	PWD male	PWD	male	Musc	M.musculus					0.313953488372093				59	1
8feb17_17mar16_G_f5_sp1_9_rev	121	5.9972	0.049482	4	8feb17_17mar16_G_f5_sp1_9_rev_4	1	0			1	38					17mar16_G_f5	G female	G	female	Dom	M.musculus					0.31404958677686				83	0
27jul19_26oct18_SKIVE_f1_sp1_25_rev	54	3.7987	0.070911	8	27jul19_26oct18_SKIVE_f1_sp1_25_rev_8	1	0			1	17					26oct18_SKIVE_f1	SKIVE female	SKIVE	female	Musc	M.musculus					0.3148148148148148				37	0
15mar16_16jan16_G_f1_sp1_5_rev	111	2.1384	0.01926	9	15mar16_16jan16_G_f1_sp1_5_rev_9	1	0			1	35					16jan16_G_f1	G female	G	female	Dom	M.musculus					0.315315315315315				76	0
27jul19_26oct18_SKIVE_f2_sp1_13_rev	76	4.1213	0.054503	21	27jul19_26oct18_SKIVE_f2_sp1_13_rev_21	1	0			1	24					26oct18_SKIVE_f2	SKIVE female	SKIVE	female	Musc	M.musculus					0.3157894736842105				52	0
30jun17_4jan17_LEW_f3_sp1_8_rev	95	1.5873	0.016629	7	30jun17_4jan17_LEW_f3_sp1_8_rev_7	1	0			1	30					4jan17_LEW_f3	LEW female	LEW	female	Dom	M.musculus					0.315789473684211				65	0
7feb18_11jan18_KAZ_m4_sp1_16.2_rev	60	5.1815	0.086654	14	7feb18_11jan18_KAZ_m4_sp1_16.2_rev_14	1	0			1	19					11jan18_KAZ_m4	KAZ male	KAZ	male	Musc	M.musculus					0.316666666666667				41	0
12may15_30sep14_G_m5_sp1_15.2_rev	82	3.8841	0.047114	8	12may15_30sep14_G_m5_sp1_15.2_rev_8	1	0			1	26				small faint foci	30sep14_G_m5	G male	G	male	Dom	M.musculus					0.317073170731707				56	0
1mar16_20feb16_G_f3_sp1_10_rev	82	5.3167	0.064794	14	1mar16_20feb16_G_f3_sp1_10_rev_14	1	0			1	26					20feb16_G_f3	G female	G	female	Dom	M.musculus					0.317073170731707				56	0
13sep18_28jun18_MOLF_m1_sp1_18.1_rev	104	2.7692	0.026575	2	13sep18_28jun18_MOLF_m1_sp1_18.1_rev_2	1	0			1	33					28jun18_MOLF_m1	MOLF male	MOLF	male	Mol	M.musculus					0.317307692307692				71	0
5jun18_21may18_KAZ_m2_sp1_10.2_rev	88	7.9231	0.089585	6	5jun18_21may18_KAZ_m2_sp1_10.2_rev_6	1	0			1	28					21may18_KAZ_m2	KAZ male	KAZ	male	Musc	M.musculus					0.318181818181818				60	0
29nov17_16nov17_MSM_f1_sp1_10_rev	132	7.1886	0.05455	8	29nov17_16nov17_MSM_f1_sp1_10_rev_8	1	0			1	42					16nov17_MSM_f1	MSM female	MSM	female	Mol	M.musculus					0.318181818181818				90	0
26dec17_18nov17_WSB_f4_sp1_35_rev	69	2.9508	0.042728	2	26dec17_18nov17_WSB_f4_sp1_35_rev_2	1	0			1	22					18nov17_WSB_f4	WSB female	WSB	female	Dom	M.musculus					0.318840579710145				47	0
27aug15_12jun15_WSB_m2_sp1_9.2_rev	69	4.248	0.06198	16	27aug15_12jun15_WSB_m2_sp1_9.2_rev_16	1	0			1	22					12jun15_WSB_m2	WSB male	WSB	male	Dom	M.musculus					0.318840579710145				47	0
15mar17_13jan17_LEW_f3_sp1_12_rev	97	9.4953	0.097707	6	15mar17_13jan17_LEW_f3_sp1_12_rev_6	1	0			1	31					13jan17_LEW_f3	LEW female	LEW	female	Dom	M.musculus					0.319587628865979				66	0
15mar17_13jan17_LEW_f3_sp1_20_rev	97	3.8235	0.039283	11	15mar17_13jan17_LEW_f3_sp1_20_rev_11	1	0			1	31				2 faint foci below	13jan17_LEW_f3	LEW female	LEW	female	Dom	M.musculus					0.319587628865979				66	0
8feb17_4jan17_LEW_f1_sp1_4_rev	172	2.9851	0.017386	10	8feb17_4jan17_LEW_f1_sp1_4_rev_10	1	0			1	55					4jan17_LEW_f1	LEW female	LEW	female	Dom	M.musculus					0.319767441860465				117	0
13sep18_28jun18_MOLF_m1_sp1_5.1_rev	75	5.8973	0.078299	17	13sep18_28jun18_MOLF_m1_sp1_5.1_rev_17	1	0			1	24					28jun18_MOLF_m1	MOLF male	MOLF	male	Mol	M.musculus					0.32				51	0
15mar17_13jan17_LEW_f3_sp1_22_rev	78	4.3821	0.055826	21	15mar17_13jan17_LEW_f3_sp1_22_rev_21	1	0			1	25					13jan17_LEW_f3	LEW female	LEW	female	Dom	M.musculus					0.320512820512821				53	0
5jul15_23apr15_PWD_f1_sp1_18_rev	131	3.1749	0.024231	8	5jul15_23apr15_PWD_f1_sp1_18_rev_8	1	0			1	42					23apr15_PWD_f1	PWD female	PWD	female	Musc	M.musculus					0.320610687022901				89	0
23jul19_28sep18_CZECH_m2_sp1_17_rev	53	6.3912	0.11973	11	23jul19_28sep18_CZECH_m2_sp1_17_rev_11	1	0			1	17					28sep18_CZECH_m2	CZECH male	CZECH	male	Musc	M.musculus					0.320754716981132				36	0
5aug17_14jul17_MSM_f1_sp1_9_rev	143	2.9263	0.020496	8	5aug17_14jul17_MSM_f1_sp1_9_rev_8	1	0			1	46					14jul17_MSM_f1	MSM female	MSM	female	Mol	M.musculus					0.321678321678322				97	0
27mar16_6mar16_G_m2_sp1_8.2_rev	59	2.8125	0.047652	17	27mar16_6mar16_G_m2_sp1_8.2_rev_17	1	0			1	19					6mar16_G_m2	G male	G	male	Dom	M.musculus					0.322033898305085				40	0
9aug15_23apr15_PWD_f2_sp1_1_rev	127	5.4217	0.042652	1	9aug15_23apr15_PWD_f2_sp1_1_rev_1	1	0			1	41					23apr15_PWD_f2	PWD female	PWD	female	Musc	M.musculus					0.322834645669291				86	0
4dec17_16nov17_MSM_f2_sp1_32_rev	96	5.0156	0.052269	10	4dec17_16nov17_MSM_f2_sp1_32_rev_10	1	0			1	31					16nov17_MSM_f2	MSM female	MSM	female	Mol	M.musculus					0.322916666666667				65	0
27mar16_6mar16_PWD_m1_sp1_5_rev	99	3.4182	0.034657	9	27mar16_6mar16_PWD_m1_sp1_5_rev_9	1	0			1	32					6mar16_PWD_m1	PWD male	PWD	male	Musc	M.musculus					0.323232323232323				67	1
8jun15_23apr15_PWD_f2_sp1_11_rev	102	7.6127	0.074505	22	8jun15_23apr15_PWD_f2_sp1_11_rev_22	1	0			1	33					23apr15_PWD_f2	PWD female	PWD	female	Musc	M.musculus					0.323529411764706				69	0
16feb16_17mar16_G_f4_sp1_1_rev	105	4.8274	0.046139	10	16feb16_17mar16_G_f4_sp1_1_rev_10	1	0			1	34					17mar16_G_f4	G female	G	female	Dom	M.musculus					0.323809523809524				71	0
10jun19_31may19_SKIVE_f6_sp1_54_rev	71	4.1271	0.058495	6	10jun19_31may19_SKIVE_f6_sp1_54_rev_6	1	0			1	23					31may19_SKIVE_f6	SKIVE female	SKIVE	female	Musc	M.musculus					0.323943661971831				48	0
7feb18_11jan18_KAZ_m4_sp1_26.1_rev	74	4.4098	0.059659	2	7feb18_11jan18_KAZ_m4_sp1_26.1_rev_2	1	0			1	24					11jan18_KAZ_m4	KAZ male	KAZ	male	Musc	M.musculus					0.324324324324324				50	0
18sep19_19aug19_SKIVE_m2_sp1_12_rev	74	3.394	0.045749	16	18sep19_19aug19_SKIVE_m2_sp1_12_rev_16	1	0			1	24					19aug19_SKIVE_m2	SKIVE male	SKIVE	male	Musc	M.musculus					0.324324324324324				50	1
16feb16_17mar16_G_f4_sp1_8_rev	77	5.099	0.0663	15	16feb16_17mar16_G_f4_sp1_8_rev_15	1	0			1	25					17mar16_G_f4	G female	G	female	Dom	M.musculus					0.324675324675325				52	0
19jan17_4jan17_LEW_f6_sp1_11_rev	77	3.4375	0.044839	1	19jan17_4jan17_LEW_f6_sp1_11_rev_1	1	0			1	25					4jan17_LEW_f6	LEW female	LEW	female	Dom	M.musculus					0.324675324675325				52	0
2aug15_8oct14_PWD_f4_sp1_10.1_rev	77	6.4783	0.084361	10	2aug15_8oct14_PWD_f4_sp1_10.1_rev_10	1	0			1	25					8oct14_PWD_f4	PWD female	PWD	female	Musc	M.musculus					0.324675324675325				52	0
5jun18_21may18_KAZ_m2_sp1_18_rev	80	5.6168	0.070253	5	5jun18_21may18_KAZ_m2_sp1_18_rev_5	1	0			1	26					21may18_KAZ_m2	KAZ male	KAZ	male	Musc	M.musculus					0.325				54	0
19jan17_4jan17_LEW_f6_sp1_25_rev	80	4	0.050062	14	19jan17_4jan17_LEW_f6_sp1_25_rev_14	1	0			1	26					4jan17_LEW_f6	LEW female	LEW	female	Dom	M.musculus					0.325				54	0
18sep19_19aug19_SKIVE_m3_sp1_1.1_rev	80	3.5294	0.044181	15	18sep19_19aug19_SKIVE_m3_sp1_1.1_rev_15	1	0			1	26					19aug19_SKIVE_m3	SKIVE male	SKIVE	male	Musc	M.musculus					0.325				54	1
8jun15_23apr15_PWD_f2_sp1_11_rev	123	6.0758	0.049265	15	8jun15_23apr15_PWD_f2_sp1_11_rev_15	1	0			1	40					23apr15_PWD_f2	PWD female	PWD	female	Musc	M.musculus					0.32520325203252				83	0
11dec17_18nov17_WSB_f1_sp1_15_rev	129	0.30769	0.0023914	11	11dec17_18nov17_WSB_f1_sp1_15_rev_11	1	0			1	42					18nov17_WSB_f1	WSB female	WSB	female	Dom	M.musculus					0.325581395348837				87	0
26dec17_18nov17_WSB_f4_sp1_15_rev	86	6.8228	0.07915	1	26dec17_18nov17_WSB_f4_sp1_15_rev_1	1	0			1	28					18nov17_WSB_f4	WSB female	WSB	female	Dom	M.musculus					0.325581395348837				58	0
15mar17_13jan17_LEW_f3_sp1_13_rev	89	4.884	0.054985	16	15mar17_13jan17_LEW_f3_sp1_13_rev_16	1	0			1	29					13jan17_LEW_f3	LEW female	LEW	female	Dom	M.musculus					0.325842696629214				60	0
8feb18_1feb18_KAZ_f1_sp1_3_rev	92	1.6393	0.017888	6	8feb18_1feb18_KAZ_f1_sp1_3_rev_6	1	0			1	30					1feb18_KAZ_f1	KAZ female	KAZ	female	Musc	M.musculus					0.326086956521739				62	0
22jul19_26oct18_SKIVE_f3_sp1_22_rev	92	5.3897	0.058537	4	22jul19_26oct18_SKIVE_f3_sp1_22_rev_4	1	0			1	30					26oct18_SKIVE_f3	SKIVE female	SKIVE	female	Musc	M.musculus					0.32608695652173914				62	0
8jun15_23apr15_PWD_f2_sp1_15_rev	153	5.8898	0.038591	21	8jun15_23apr15_PWD_f2_sp1_15_rev_21	1	0			1	50					23apr15_PWD_f2	PWD female	PWD	female	Musc	M.musculus					0.326797385620915				103	0
16nov16_17mar16_G_f5_sp1_9_rev	104	2.6087	0.025178	10	16nov16_17mar16_G_f5_sp1_9_rev_10	1	0			1	34					17mar16_G_f5	G female	G	female	Dom	M.musculus					0.326923076923077				70	0
19may15_31mar15_WSB_m1_sp1_21.2_rev	64	2.7115	0.042324	8	19may15_31mar15_WSB_m1_sp1_21.2_rev_8	1	0			1	21					31mar15_WSB_m1	WSB male	WSB	male	Dom	M.musculus					0.328125				43	0
4dec17_16nov17_MSM_f2_sp1_25.2_rev	152	5.4492	0.03583	9	4dec17_16nov17_MSM_f2_sp1_25.2_rev_9	1	0			1	50					16nov17_MSM_f2	MSM female	MSM	female	Mol	M.musculus					0.328947368421053				102	0
12oct18_26sep18_CZECH_m1_sp1_18_rev	79	3.75	0.04765	9	12oct18_26sep18_CZECH_m1_sp1_18_rev_9	1	0			1	26					26sep18_CZECH_m1	CZECH male	CZECH	male	Musc	M.musculus					0.329113924050633				53	0
26dec17_18nov17_WSB_f4_sp1_27_rev	79	5.9647	0.075877	15	26dec17_18nov17_WSB_f4_sp1_27_rev_15	1	0			1	26					18nov17_WSB_f4	WSB female	WSB	female	Dom	M.musculus					0.329113924050633				53	0
2aug15_8oct14_PWD_f4_sp1_15_rev	85	5.9878	0.070735	6	2aug15_8oct14_PWD_f4_sp1_15_rev_6	1	0			1	28					8oct14_PWD_f4	PWD female	PWD	female	Musc	M.musculus					0.329411764705882				57	0
15mar17_13jan17_LEW_f3_sp1_9_rev	97	4.1501	0.042765	16	15mar17_13jan17_LEW_f3_sp1_9_rev_16	1	0			1	32					13jan17_LEW_f3	LEW female	LEW	female	Dom	M.musculus					0.329896907216495				65	0
10jun19_31may19_SKIVE_f6_sp1_59.1_rev	112	8.013	0.071252	5	10jun19_31may19_SKIVE_f6_sp1_59.1_rev_5	1	0			1	37					31may19_SKIVE_f6	SKIVE female	SKIVE	female	Musc	M.musculus					0.330357142857143				75	0
25jul19_28sep18_CZECH_m3_sp1_11.1_rev	118	3.7657	0.031882	12	25jul19_28sep18_CZECH_m3_sp1_11.1_rev_12	1	0			1	39					28sep18_CZECH_m3	CZECH male	CZECH	male	Musc	M.musculus					0.330508474576271				79	0
14dec17_18nov17_WSB_f3_sp1_34_rev	118	2.314	0.01965	5	14dec17_18nov17_WSB_f3_sp1_34_rev_5	1	0			1	39					18nov17_WSB_f3	WSB female	WSB	female	Dom	M.musculus					0.330508474576271				79	0
16feb16_17mar16_G_f4_sp1_7_rev	96	1.3699	0.014207	14	16feb16_17mar16_G_f4_sp1_7_rev_14	1	0			1	32					17mar16_G_f4	G female	G	female	Dom	M.musculus					0.333333333333333				64	0
1mar16_20feb16_G_f3_sp1_15_rev	81	6.553	0.081187	14	1mar16_20feb16_G_f3_sp1_15_rev_14	1	0			1	27					20feb16_G_f3	G female	G	female	Dom	M.musculus					0.333333333333333				54	0
5jun18_21may18_KAZ_m2_sp1_11_rev	117	7.1098	0.060801	13	5jun18_21may18_KAZ_m2_sp1_11_rev_13	1	0			1	39					21may18_KAZ_m2	KAZ male	KAZ	male	Musc	M.musculus					0.333333333333333				78	0
19jan17_4jan17_LEW_f7_sp1_32_rev	51	4.7534	0.093769	16	19jan17_4jan17_LEW_f7_sp1_32_rev_16	1	0			1	17					4jan17_LEW_f7	LEW female	LEW	female	Dom	M.musculus					0.333333333333333				34	0
4dec17_16nov17_MSM_f2_sp1_37.1_rev	141	7.088	0.050195	7	4dec17_16nov17_MSM_f2_sp1_37.1_rev_7	1	0			1	47					16nov17_MSM_f2	MSM female	MSM	female	Mol	M.musculus					0.333333333333333				94	0
2apr15_28feb15_PWD_f3_sp1_3_rev	72	5.0859	0.071112	8	2apr15_28feb15_PWD_f3_sp1_3_rev_8	1	0			1	24					28feb15_PWD_f3	PWD female	PWD	female	Musc	M.musculus					0.333333333333333				48	0
2aug15_8oct14_PWD_f4_sp1_15_rev	54	5.1192	0.094478	12	2aug15_8oct14_PWD_f4_sp1_15_rev_12	1	0			1	18					8oct14_PWD_f4	PWD female	PWD	female	Musc	M.musculus					0.333333333333333				36	0
8jun15_23apr15_PWD_f2_sp1_2_rev	150	3.2683	0.021852	13	8jun15_23apr15_PWD_f2_sp1_2_rev_13	1	0			1	50					23apr15_PWD_f2	PWD female	PWD	female	Musc	M.musculus					0.333333333333333				100	0
10jun19_31may19_SKIVE_f6_sp1_48_rev	123	2.6471	0.021584	14	10jun19_31may19_SKIVE_f6_sp1_48_rev_14	1	0			1	41					31may19_SKIVE_f6	SKIVE female	SKIVE	female	Musc	M.musculus					0.333333333333333				82	0
10jun19_31may19_SKIVE_f6_sp1_59.1_rev	90	4.2064	0.046821	11	10jun19_31may19_SKIVE_f6_sp1_59.1_rev_11	1	0			1	30					31may19_SKIVE_f6	SKIVE female	SKIVE	female	Musc	M.musculus					0.333333333333333				60	0
11dec17_18nov17_WSB_f1_sp1_9_rev	69	3.0303	0.043992	3	11dec17_18nov17_WSB_f1_sp1_9_rev_3	1	0			1	23					18nov17_WSB_f1	WSB female	WSB	female	Dom	M.musculus					0.333333333333333				46	0
27aug15_12jun15_WSB_m2_sp1_23_rev	81	3.4434	0.04271	8	27aug15_12jun15_WSB_m2_sp1_23_rev_8	1	0			1	27					12jun15_WSB_m2	WSB male	WSB	male	Dom	M.musculus					0.333333333333333				54	0
27jul19_26oct18_SKIVE_f1_sp1_25_rev	69	5.5981	0.080902	10	27jul19_26oct18_SKIVE_f1_sp1_25_rev_10	1	0			1	23					26oct18_SKIVE_f1	SKIVE female	SKIVE	female	Musc	M.musculus					0.3333333333333333				46	0
9apr18_1feb18_LEW_f1_sp1_9_rev	170	4.7619	0.027953	7	9apr18_1feb18_LEW_f1_sp1_9_rev_7	1	0			1	57					1feb18_LEW_f1	LEW female	LEW	female	Dom	M.musculus					0.335294117647059				113	0
24may17_17mar16_G_f5_sp1_10_rev	134	4.9776	0.037016	14	24may17_17mar16_G_f5_sp1_10_rev_14	1	0			1	45					17mar16_G_f5	G female	G	female	Dom	M.musculus					0.335820895522388				89	0
5aug17_14jul17_MSM_f1_sp1_26_rev	131	7.0007	0.05358	16	5aug17_14jul17_MSM_f1_sp1_26_rev_16	1	0			1	44					14jul17_MSM_f1	MSM female	MSM	female	Mol	M.musculus					0.33587786259542				87	0
17nov16_17mar16_G_f1_sp1_15_rev	107	5.4286	0.050615	6	17nov16_17mar16_G_f1_sp1_15_rev_6	1	0			1	36					17mar16_G_f1	G female	G	female	Dom	M.musculus					0.336448598130841				71	0
12jul15_12jun15_WSB_m1_sp1_13.1_rev	98	3.382	0.034541	4	12jul15_12jun15_WSB_m1_sp1_13.1_rev_4	1	0			1	33					12jun15_WSB_m1	WSB male	WSB	male	Dom	M.musculus					0.336734693877551				65	0
9aug15_23apr15_PWD_f2_sp1_8_rev	95	7.6531	0.080929	15	9aug15_23apr15_PWD_f2_sp1_8_rev_15	1	0			1	32					23apr15_PWD_f2	PWD female	PWD	female	Musc	M.musculus					0.336842105263158				63	0
8feb18_1feb18_KAZ_f1_sp1_4_rev	89	3.3846	0.03808	1	8feb18_1feb18_KAZ_f1_sp1_4_rev_1	1	0			1	30					1feb18_KAZ_f1	KAZ female	KAZ	female	Musc	M.musculus					0.337078651685393				59	0
21nov17_16nov17_MSM_f3_sp1_33_rev	89	5.3048	0.059911	20	21nov17_16nov17_MSM_f3_sp1_33_rev_20	1	0			1	30					16nov17_MSM_f3	MSM female	MSM	female	Mol	M.musculus					0.337078651685393				59	0
10jan18_13jan17_LEW_f1_sp1_14_rev	80	5.4136	0.067321	1	10jan18_13jan17_LEW_f1_sp1_14_rev_1	1	0			1	27					13jan17_LEW_f1	LEW female	LEW	female	Dom	M.musculus					0.3375				53	0
14dec17_18nov17_WSB_f3_sp1_2_rev	130	4.7956	0.036881	6	14dec17_18nov17_WSB_f3_sp1_2_rev_6	1	0			1	44					18nov17_WSB_f3	WSB female	WSB	female	Dom	M.musculus					0.338461538461538				86	0
11dec17_18nov17_WSB_f1_sp1_10_rev	124	3.257	0.026219	17	11dec17_18nov17_WSB_f1_sp1_10_rev_17	1	0			1	42					18nov17_WSB_f1	WSB female	WSB	female	Dom	M.musculus					0.338709677419355				82	0
11jan19_27oct18_SKIVE_m1_sp1_30_rev	109	3.8335	0.035083	5	11jan19_27oct18_SKIVE_m1_sp1_30_rev_5	1	0			1	37					27oct18_SKIVE_m1	SKIVE male	SKIVE	male	Musc	M.musculus					0.339449541284404				72	1
12feb15_13oct14_G_f2_sp1_1_rev	97	4.7362	0.048649	21	12feb15_13oct14_G_f2_sp1_1_rev_21	1	0			1	33					13oct14_G_f2	G female	G	female	Dom	M.musculus					0.34020618556701				64	0
19jan17_4jan17_LEW_f6_sp1_46_rev	91	4.0856	0.045083	10	19jan17_4jan17_LEW_f6_sp1_46_rev_10	1	0			1	31					4jan17_LEW_f6	LEW female	LEW	female	Dom	M.musculus					0.340659340659341				60	0
10jun15_24mar15_G_m1_sp1_9_rev	88	3.9294	0.044886	5	10jun15_24mar15_G_m1_sp1_9_rev_5	1	0			1	30					24mar15_G_m1	G male	G	male	Dom	M.musculus					0.340909090909091				58	0
19jan17_4jan17_LEW_f6_sp1_23_rev	88	5.1689	0.05862	5	19jan17_4jan17_LEW_f6_sp1_23_rev_5	1	0			1	30					4jan17_LEW_f6	LEW female	LEW	female	Dom	M.musculus					0.340909090909091				58	0
18sep19_19aug19_SKIVE_m3_sp1_1.1_rev	85	3.2347	0.038203	11	18sep19_19aug19_SKIVE_m3_sp1_1.1_rev_11	1	0			1	29					19aug19_SKIVE_m3	SKIVE male	SKIVE	male	Musc	M.musculus					0.341176470588235				56	1
14dec17_18nov17_WSB_f3_sp1_9_rev	79	2.9032	0.036852	9	14dec17_18nov17_WSB_f3_sp1_9_rev_9	1	0			1	27					18nov17_WSB_f3	WSB female	WSB	female	Dom	M.musculus					0.341772151898734				52	0
10jun19_31may19_SKIVE_f6_sp1_48_rev	143	4.2894	0.030067	6	10jun19_31may19_SKIVE_f6_sp1_48_rev_6	1	0			1	49					31may19_SKIVE_f6	SKIVE female	SKIVE	female	Musc	M.musculus					0.342657342657343				94	0
8feb17_20dec16_LEW_m1_sp1_13_rev	67	6.3715	0.0954	5	8feb17_20dec16_LEW_m1_sp1_13_rev_5	1	0			1	23					20dec16_LEW_m1	LEW male	LEW	male	Dom	M.musculus					0.343283582089552				44	0
25feb15_8oct14_PWD_f8_sp1_1_rev	99	4.2061	0.042522	2	25feb15_8oct14_PWD_f8_sp1_1_rev_2	1	0			1	34					8oct14_PWD_f8	PWD female	PWD	female	Musc	M.musculus					0.343434343434343				65	0
12dec17_18nov17_WSB_f2_sp1_7_rev	64	2.1212	0.033231	7	12dec17_18nov17_WSB_f2_sp1_7_rev_7	1	0			1	22					18nov17_WSB_f2	WSB female	WSB	female	Dom	M.musculus					0.34375				42	0
21nov17_16nov17_MSM_f3_sp1_18_rev	119	3.1057	0.026001	1	21nov17_16nov17_MSM_f3_sp1_18_rev_1	1	0			1	41					16nov17_MSM_f3	MSM female	MSM	female	Mol	M.musculus					0.34453781512605				78	0
1mar18_1feb18_KAZ_f3_sp1_1_rev	98	5.1543	0.052531	3	1mar18_1feb18_KAZ_f3_sp1_1_rev_3	1	0			1	34					1feb18_KAZ_f3	KAZ female	KAZ	female	Musc	M.musculus					0.346938775510204				64	0
27jul19_26oct18_SKIVE_f2_sp1_13_rev	95	5.8939	0.062319	14	27jul19_26oct18_SKIVE_f2_sp1_13_rev_14	1	0			1	33					26oct18_SKIVE_f2	SKIVE female	SKIVE	female	Musc	M.musculus					0.3473684210526316				62	0
27jul19_26oct18_SKIVE_f1_sp1_15.2_rev	92	3.3333	0.03634	10	27jul19_26oct18_SKIVE_f1_sp1_15.2_rev_10	1	0			1	32				1 faint later foci	26oct18_SKIVE_f1	SKIVE female	SKIVE	female	Musc	M.musculus					0.34782608695652173				60	0
12feb15_13oct14_G_f2_sp1_3_rev	92	2.9033	0.031519	1	12feb15_13oct14_G_f2_sp1_3_rev_1	1	0			1	32					13oct14_G_f2	G female	G	female	Dom	M.musculus					0.347826086956522				60	0
19jan17_4jan17_LEW_f6_sp1_24_rev	92	2.1212	0.023098	5	19jan17_4jan17_LEW_f6_sp1_24_rev_5	1	0			1	32					4jan17_LEW_f6	LEW female	LEW	female	Dom	M.musculus					0.347826086956522				60	0
10jun19_31may19_SKIVE_f6_sp1_60_rev	92	3.879	0.042291	19	10jun19_31may19_SKIVE_f6_sp1_60_rev_19	1	0			1	32					31may19_SKIVE_f6	SKIVE female	SKIVE	female	Musc	M.musculus					0.347826086956522				60	0
12dec17_18nov17_WSB_f2_sp1_6_rev	69	2.9412	0.042764	3	12dec17_18nov17_WSB_f2_sp1_6_rev_3	1	0			1	24					18nov17_WSB_f2	WSB female	WSB	female	Dom	M.musculus					0.347826086956522				45	0
8feb18_1feb18_KAZ_f1_sp1_26_rev	89	3.3846	0.038099	7	8feb18_1feb18_KAZ_f1_sp1_26_rev_7	1	0			1	31					1feb18_KAZ_f1	KAZ female	KAZ	female	Musc	M.musculus					0.348314606741573				58	0
7mar15_1mar15_PWD_m1_sp4_15_rev	89	4.5185	0.050637	9	7mar15_1mar15_PWD_m1_sp4_15_rev_9	1	0			1	31					1mar15_PWD_m1	PWD male	PWD	male	Musc	M.musculus					0.348314606741573				58	1
11dec17_18nov17_WSB_f1_sp1_14_rev	63	4.4319	0.070121	1	11dec17_18nov17_WSB_f1_sp1_14_rev_1	1	0			1	22					18nov17_WSB_f1	WSB female	WSB	female	Dom	M.musculus					0.349206349206349				41	0
16feb16_17mar16_G_f4_sp1_9_rev	120	4.8744	0.040706	1	16feb16_17mar16_G_f4_sp1_9_rev_1	1	0			1	42					17mar16_G_f4	G female	G	female	Dom	M.musculus					0.35				78	0
27mar16_6mar16_G_m2_sp1_9.1_rev	80	5.1612	0.064914	12	27mar16_6mar16_G_m2_sp1_9.1_rev_12	1	0			1	28					6mar16_G_m2	G male	G	male	Dom	M.musculus					0.35				52	0
30jun17_4jan17_LEW_f3_sp1_1_rev	160	4.3828	0.027417	17	30jun17_4jan17_LEW_f3_sp1_1_rev_17	1	0			1	56				faint foci	4jan17_LEW_f3	LEW female	LEW	female	Dom	M.musculus					0.35				104	0
4dec17_16nov17_MSM_f2_sp1_25.1_rev	137	3.4876	0.025507	8	4dec17_16nov17_MSM_f2_sp1_25.1_rev_8	1	0			1	48					16nov17_MSM_f2	MSM female	MSM	female	Mol	M.musculus					0.35036496350365				89	0
27aug15_12jun15_WSB_m2_sp1_6_rev	97	3.7787	0.038842	9	27aug15_12jun15_WSB_m2_sp1_6_rev_9	1	0			1	34					12jun15_WSB_m2	WSB male	WSB	male	Dom	M.musculus					0.350515463917526				63	0
12feb15_13oct14_G_f2_sp1_1_rev	77	4.0371	0.052562	18	12feb15_13oct14_G_f2_sp1_1_rev_18	1	0			1	27					13oct14_G_f2	G female	G	female	Dom	M.musculus					0.350649350649351				50	0
21nov17_16nov17_MSM_f3_sp1_3_rev	94	10.4522	0.11071	9	21nov17_16nov17_MSM_f3_sp1_3_rev_9	1	0			1	33					16nov17_MSM_f3	MSM female	MSM	female	Mol	M.musculus					0.351063829787234				61	0
2aug15_8oct14_PWD_f4_sp1_11.2_rev	111	3.6909	0.033389	2	2aug15_8oct14_PWD_f4_sp1_11.2_rev_2	1	0			1	39					8oct14_PWD_f4	PWD female	PWD	female	Musc	M.musculus					0.351351351351351				72	0
20may15_17apr15_PWD_f4_sp1_9_rev	111	5.0979	0.045843	2	20may15_17apr15_PWD_f4_sp1_9_rev_2	1	0			1	39					17apr15_PWD_f4	PWD female	PWD	female	Musc	M.musculus					0.351351351351351				72	0
21nov17_16nov17_MSM_f3_sp1_1_rev	128	6.9815	0.054652	13	21nov17_16nov17_MSM_f3_sp1_1_rev_13	1	0			1	45					16nov17_MSM_f3	MSM female	MSM	female	Mol	M.musculus					0.3515625				83	0
15mar16_16jan16_G_f1_sp1_1_rev	108	7.7316	0.071827	12	15mar16_16jan16_G_f1_sp1_1_rev_12	1	0			1	38					16jan16_G_f1	G female	G	female	Dom	M.musculus					0.351851851851852				70	0
15mar17_13jan17_LEW_f3_sp1_15_rev	125	2.3529	0.018886	5	15mar17_13jan17_LEW_f3_sp1_15_rev_5	1	0			1	44					13jan17_LEW_f3	LEW female	LEW	female	Dom	M.musculus					0.352				81	0
4jun19_28sep18_MOLF_m1_sp1_17.1_rev	88	2	0.022725	14	4jun19_28sep18_MOLF_m1_sp1_17.1_rev_14	1	0			1	31					28sep18_MOLF_m1	MOLF male	MOLF	male	Mol	M.musculus					0.352272727272727				57	0
26dec17_18nov17_WSB_f4_sp1_26_rev	88	1.875	0.021279	16	26dec17_18nov17_WSB_f4_sp1_26_rev_16	1	0			1	31					18nov17_WSB_f4	WSB female	WSB	female	Dom	M.musculus					0.352272727272727				57	0
8feb18_1feb18_KAZ_f1_sp1_3_rev	102	2.7273	0.026848	4	8feb18_1feb18_KAZ_f1_sp1_3_rev_4	1	0			1	36					1feb18_KAZ_f1	KAZ female	KAZ	female	Musc	M.musculus					0.352941176470588				66	0
7feb18_11jan18_KAZ_m4_sp1_7_rev	51	4.4779	0.087904	11	7feb18_11jan18_KAZ_m4_sp1_7_rev_11	1	0			1	18					11jan18_KAZ_m4	KAZ male	KAZ	male	Musc	M.musculus					0.352941176470588				33	0
19jan17_4jan17_LEW_f6_sp1_28_rev	119	3.5821	0.030167	23	19jan17_4jan17_LEW_f6_sp1_28_rev_23	1	0			1	42					4jan17_LEW_f6	LEW female	LEW	female	Dom	M.musculus					0.352941176470588				77	0
3mar15_13jan17_LEW_m1_sp1_4_rev	68	6.0279	0.088453	13	3mar15_13jan17_LEW_m1_sp1_4_rev_13	1	0			1	24					13jan17_LEW_m1	LEW male	LEW	male	Dom	M.musculus					0.352941176470588				44	0
27jul19_26oct18_SKIVE_f1_sp1_25_rev	85	4.0591	0.04794	11	27jul19_26oct18_SKIVE_f1_sp1_25_rev_11	1	0			1	30					26oct18_SKIVE_f1	SKIVE female	SKIVE	female	Musc	M.musculus					0.35294117647058826				55	0
10jun19_31may19_SKIVE_f6_sp1_44_rev	116	1.9444	0.01671	16	10jun19_31may19_SKIVE_f6_sp1_44_rev_16	1	0			1	41					31may19_SKIVE_f6	SKIVE female	SKIVE	female	Musc	M.musculus					0.353448275862069				75	0
27mar16_6mar16_G_m3_sp1_12_rev	65	6.5919	0.10108	3	27mar16_6mar16_G_m3_sp1_12_rev_3	1	0			1	23					6mar16_G_m3	G male	G	male	Dom	M.musculus					0.353846153846154				42	0
26jan18_11jan18_KAZ_m3_sp1_21_rev	65	5.0955	0.078878	7	26jan18_11jan18_KAZ_m3_sp1_21_rev_7	1	0			1	23					11jan18_KAZ_m3	KAZ male	KAZ	male	Musc	M.musculus					0.353846153846154				42	0
29nov17_16nov17_MSM_f1_sp1_19_rev	113	6.3097	0.055719	8	29nov17_16nov17_MSM_f1_sp1_19_rev_8	1	0			1	40					16nov17_MSM_f1	MSM female	MSM	female	Mol	M.musculus					0.353982300884956				73	0
19jan17_4jan17_LEW_f6_sp1_27_rev	127	3.9492	0.031131	12	19jan17_4jan17_LEW_f6_sp1_27_rev_12	1	0			1	45					4jan17_LEW_f6	LEW female	LEW	female	Dom	M.musculus					0.354330708661417				82	0
2jul17_20dec16_LEW_m3_sp1_10_rev	79	5.0512	0.064164	5	2jul17_20dec16_LEW_m3_sp1_10_rev_5	1	0			1	28					20dec16_LEW_m3	LEW male	LEW	male	Dom	M.musculus					0.354430379746835				51	0
27mar16_6mar16_G_m2_sp1_6.2_rev	93	1.1765	0.012661	18	27mar16_6mar16_G_m2_sp1_6.2_rev_18	1	0			1	33					6mar16_G_m2	G male	G	male	Dom	M.musculus					0.354838709677419				60	0
8jun15_23apr15_PWD_f2_sp1_11_rev	107	3.9294	0.036852	30	8jun15_23apr15_PWD_f2_sp1_11_rev_30	1	0			1	38					23apr15_PWD_f2	PWD female	PWD	female	Musc	M.musculus					0.355140186915888				69	0
19may15_31mar15_WSB_m1_sp1_13.1_rev	107	4.4787	0.041976	14	19may15_31mar15_WSB_m1_sp1_13.1_rev_14	1	0			1	38					31mar15_WSB_m1	WSB male	WSB	male	Dom	M.musculus					0.355140186915888				69	0
5jun18_21may18_KAZ_m2_sp1_10.2_rev	76	4.8394	0.063517	1	5jun18_21may18_KAZ_m2_sp1_10.2_rev_1	1	0			1	27					21may18_KAZ_m2	KAZ male	KAZ	male	Musc	M.musculus					0.355263157894737				49	0
19jan17_4jan17_LEW_f6_sp1_35_rev	76	2.4615	0.032508	9	19jan17_4jan17_LEW_f6_sp1_35_rev_9	1	0			1	27					4jan17_LEW_f6	LEW female	LEW	female	Dom	M.musculus					0.355263157894737				49	0
19jan17_4jan17_LEW_f6_sp1_45_rev	76	6.1047	0.080761	16	19jan17_4jan17_LEW_f6_sp1_45_rev_16	1	0			1	27				faint foci below	4jan17_LEW_f6	LEW female	LEW	female	Dom	M.musculus					0.355263157894737				49	0
14dec17_18nov17_WSB_f3_sp1_12_rev	76	2.6087	0.034135	18	14dec17_18nov17_WSB_f3_sp1_12_rev_18	1	0			1	27					18nov17_WSB_f3	WSB female	WSB	female	Dom	M.musculus					0.355263157894737				49	0
12jul15_12jun15_WSB_m1_sp1_4.1_rev	90	5.1447	0.057056	4	12jul15_12jun15_WSB_m1_sp1_4.1_rev_4	1	0			1	32					12jun15_WSB_m1	WSB male	WSB	male	Dom	M.musculus					0.355555555555556				58	0
16feb18_1feb18_KAZ_f4_sp1_25_rev	104	5.064	0.048848	4	16feb18_1feb18_KAZ_f4_sp1_25_rev_4	1	0			1	37					1feb18_KAZ_f4	KAZ female	KAZ	female	Musc	M.musculus					0.355769230769231				67	0
2jul17_20dec16_LEW_m3_sp1_15_rev	87	4.5998	0.05313	13	2jul17_20dec16_LEW_m3_sp1_15_rev_13	1	0			1	31					20dec16_LEW_m3	LEW male	LEW	male	Dom	M.musculus					0.35632183908046				56	0
8feb18_1feb18_KAZ_f1_sp1_20_rev	112	4.2424	0.037952	4	8feb18_1feb18_KAZ_f1_sp1_20_rev_4	1	0			1	40					1feb18_KAZ_f1	KAZ female	KAZ	female	Musc	M.musculus					0.357142857142857				72	0
3mar15_13jan17_LEW_m1_sp1_4_rev	84	5.0405	0.059949	15	3mar15_13jan17_LEW_m1_sp1_4_rev_15	1	0			1	30					13jan17_LEW_m1	LEW male	LEW	male	Dom	M.musculus					0.357142857142857				54	0
13sep18_28jun18_MOLF_m1_sp1_12.1_rev	84	4.5959	0.05494	9	13sep18_28jun18_MOLF_m1_sp1_12.1_rev_9	1	0			1	30					28jun18_MOLF_m1	MOLF male	MOLF	male	Mol	M.musculus					0.357142857142857				54	0
7mar15_1mar15_PWD_m1_sp4_20_rev	70	5.9701	0.08567	1	7mar15_1mar15_PWD_m1_sp4_20_rev_1	1	0			1	25					1mar15_PWD_m1	PWD male	PWD	male	Musc	M.musculus					0.357142857142857				45	1
4dec17_16nov17_MSM_f2_sp1_16_rev	137	3.1884	0.023349	8	4dec17_16nov17_MSM_f2_sp1_16_rev_8	1	0			1	49					16nov17_MSM_f2	MSM female	MSM	female	Mol	M.musculus					0.357664233576642				88	0
10jun19_31may19_SKIVE_f6_sp1_60_rev	81	3.8129	0.047248	5	10jun19_31may19_SKIVE_f6_sp1_60_rev_5	1	0			1	29					31may19_SKIVE_f6	SKIVE female	SKIVE	female	Musc	M.musculus					0.358024691358025				52	0
21nov17_16nov17_MSM_f3_sp1_18_rev	67	7.785	0.11604	11	21nov17_16nov17_MSM_f3_sp1_18_rev_11	1	0			1	24					16nov17_MSM_f3	MSM female	MSM	female	Mol	M.musculus					0.358208955223881				43	0
2jul17_20dec16_LEW_m3_sp1_4_rev	53	4.3859	0.08241	2	2jul17_20dec16_LEW_m3_sp1_4_rev_2	1	0			1	19					20dec16_LEW_m3	LEW male	LEW	male	Dom	M.musculus					0.358490566037736				34	0
6jun18_13jan17_LEW_f2_sp1_10_rev	106	3.7128	0.034958	6	6jun18_13jan17_LEW_f2_sp1_10_rev_6	1	0			1	38					13jan17_LEW_f2	LEW female	LEW	female	Dom	M.musculus					0.358490566037736				68	0
27aug15_12jun15_WSB_m2_sp1_16_rev	53	2	0.037459	4	27aug15_12jun15_WSB_m2_sp1_16_rev_4	1	0			1	19					12jun15_WSB_m2	WSB male	WSB	male	Dom	M.musculus					0.358490566037736				34	0
8jun15_23apr15_PWD_f2_sp1_19_rev	92	4.6375	0.050513	1	8jun15_23apr15_PWD_f2_sp1_19_rev_1	1	0			1	33					23apr15_PWD_f2	PWD female	PWD	female	Musc	M.musculus					0.358695652173913				59	0
12dec17_18nov17_WSB_f2_sp1_9_rev	92	2.2951	0.024986	1	12dec17_18nov17_WSB_f2_sp1_9_rev_1	1	0			1	33					18nov17_WSB_f2	WSB female	WSB	female	Dom	M.musculus					0.358695652173913				59	0
5jul15_23apr15_PWD_f1_sp1_18_rev	78	5.7115	0.073088	17	5jul15_23apr15_PWD_f1_sp1_18_rev_17	1	0			1	28					23apr15_PWD_f1	PWD female	PWD	female	Musc	M.musculus					0.358974358974359				50	0
12dec17_18nov17_WSB_f2_sp1_4_rev	78	3.3159	0.042636	15	12dec17_18nov17_WSB_f2_sp1_4_rev_15	1	0			1	28					18nov17_WSB_f2	WSB female	WSB	female	Dom	M.musculus					0.358974358974359				50	0
3mar15_13jan17_LEW_m1_sp1_24.2_rev	75	3.1053	0.041419	11	3mar15_13jan17_LEW_m1_sp1_24.2_rev_11	1	0			1	27					13jan17_LEW_m1	LEW male	LEW	male	Dom	M.musculus					0.36				48	0
15mar17_13jan17_LEW_f3_sp1_20_rev	86	5.3784	0.062269	2	15mar17_13jan17_LEW_f3_sp1_20_rev_2	1	0			1	31				1 faint foci below	13jan17_LEW_f3	LEW female	LEW	female	Dom	M.musculus					0.36046511627907				55	0
15mar17_13jan17_LEW_f3_sp1_22_rev	86	3.6742	0.042599	2	15mar17_13jan17_LEW_f3_sp1_22_rev_2	1	0			1	31					13jan17_LEW_f3	LEW female	LEW	female	Dom	M.musculus					0.36046511627907				55	0
12may15_30sep14_G_m5_sp1_12_rev	133	2.9032	0.021908	9	12may15_30sep14_G_m5_sp1_12_rev_9	1	0			1	48					30sep14_G_m5	G male	G	male	Dom	M.musculus					0.360902255639098				85	0
1mar16_20feb16_G_f3_sp1_18_rev	191	5.9167	0.030939	1	1mar16_20feb16_G_f3_sp1_18_rev_1	1	0			1	69				other faint foci	20feb16_G_f3	G female	G	female	Dom	M.musculus					0.361256544502618				122	0
16feb18_1feb18_KAZ_f4_sp1_18_rev	83	3.4921	0.042245	7	16feb18_1feb18_KAZ_f4_sp1_18_rev_7	1	0			1	30					1feb18_KAZ_f4	KAZ female	KAZ	female	Musc	M.musculus					0.36144578313253				53	0
26jan18_11jan18_KAZ_m3_sp1_6_rev	105	4	0.037997	13	26jan18_11jan18_KAZ_m3_sp1_6_rev_13	1	0			1	38					11jan18_KAZ_m3	KAZ male	KAZ	male	Musc	M.musculus					0.361904761904762				67	0
6mar18_1feb18_LEW_m1_sp1_10_rev	105	6.6458	0.063296	14	6mar18_1feb18_LEW_m1_sp1_10_rev_14	1	0			1	38					1feb18_LEW_m1	LEW male	LEW	male	Dom	M.musculus					0.361904761904762				67	0
4jun19_28sep18_MOLF_m1_sp1_31_rev	105	3.7681	0.035825	14	4jun19_28sep18_MOLF_m1_sp1_31_rev_14	1	0			1	38					28sep18_MOLF_m1	MOLF male	MOLF	male	Mol	M.musculus					0.361904761904762				67	0
20may15_17apr15_PWD_f4_sp1_20_rev	105	4.3348	0.041339	19	20may15_17apr15_PWD_f4_sp1_20_rev_19	1	0			1	38					17apr15_PWD_f4	PWD female	PWD	female	Musc	M.musculus					0.361904761904762				67	0
12dec17_18nov17_WSB_f2_sp1_7_rev	80	2.7778	0.034916	8	12dec17_18nov17_WSB_f2_sp1_7_rev_8	1	0			1	29					18nov17_WSB_f2	WSB female	WSB	female	Dom	M.musculus					0.3625				51	0
8feb18_1feb18_KAZ_f1_sp1_19_rev	44	3.4858	0.079927	17	8feb18_1feb18_KAZ_f1_sp1_19_rev_17	1	0			1	16					1feb18_KAZ_f1	KAZ female	KAZ	female	Musc	M.musculus					0.363636363636364				28	0
15mar17_13jan17_LEW_f3_sp1_26_rev	140	3.3257	0.023816	9	15mar17_13jan17_LEW_f3_sp1_26_rev_9	1	0			1	51					13jan17_LEW_f3	LEW female	LEW	female	Dom	M.musculus					0.364285714285714				89	0
24may17_17mar16_G_f5_sp1_10_rev	129	4.523	0.035043	15	24may17_17mar16_G_f5_sp1_10_rev_15	1	0			1	47					17mar16_G_f5	G female	G	female	Dom	M.musculus					0.364341085271318				82	0
8feb17_4jan17_LEW_f1_sp1_3_rev	129	5.1329	0.039686	5	8feb17_4jan17_LEW_f1_sp1_3_rev_5	1	0			1	47				2 other faint foci	4jan17_LEW_f1	LEW female	LEW	female	Dom	M.musculus					0.364341085271318				82	0
5aug17_14jul17_MSM_f1_sp1_15_rev	107	7.5231	0.07046	5	5aug17_14jul17_MSM_f1_sp1_15_rev_5	1	0			1	39					14jul17_MSM_f1	MSM female	MSM	female	Mol	M.musculus					0.364485981308411				68	0
11dec17_18nov17_WSB_f1_sp1_4_rev	96	2	0.020726	4	11dec17_18nov17_WSB_f1_sp1_4_rev_4	1	0			1	35					18nov17_WSB_f1	WSB female	WSB	female	Dom	M.musculus					0.364583333333333				61	0
2aug19_28sep18_MOLF_m2_sp1_8_rev	85	4.0604	0.047771	12	2aug19_28sep18_MOLF_m2_sp1_8_rev_12	1	0			1	31					28sep18_MOLF_m2	MOLF male	MOLF	male	Mol	M.musculus					0.364705882352941				54	0
14dec17_18nov17_WSB_f3_sp1_18_rev	115	0.90909	0.0078738	3	14dec17_18nov17_WSB_f3_sp1_18_rev_3	1	0			1	42					18nov17_WSB_f3	WSB female	WSB	female	Dom	M.musculus					0.365217391304348				73	0
15mar17_13jan17_LEW_f3_sp1_20_rev	104	4.2768	0.041213	17	15mar17_13jan17_LEW_f3_sp1_20_rev_17	1	0			1	38					13jan17_LEW_f3	LEW female	LEW	female	Dom	M.musculus					0.365384615384615				66	0
26dec17_18nov17_WSB_f4_sp1_22_rev	93	3.3846	0.036204	21	26dec17_18nov17_WSB_f4_sp1_22_rev_21	1	0			1	34					18nov17_WSB_f4	WSB female	WSB	female	Dom	M.musculus					0.365591397849462				59	0
13sep18_28jun18_MOLF_m1_sp1_14.1_rev	123	4.6467	0.0377	2	13sep18_28jun18_MOLF_m1_sp1_14.1_rev_2	1	0			1	45				2 other faint foci	28jun18_MOLF_m1	MOLF male	MOLF	male	Mol	M.musculus					0.365853658536585				78	0
5aug17_14jul17_MSM_f1_sp1_18_rev	123	8.9598	0.072673	2	5aug17_14jul17_MSM_f1_sp1_18_rev_2	1	0			1	45					14jul17_MSM_f1	MSM female	MSM	female	Mol	M.musculus					0.365853658536585				78	0
7mar15_1mar15_PWD_m1_sp4_6.1_rev	123	5.1069	0.041474	9	7mar15_1mar15_PWD_m1_sp4_6.1_rev_9	1	0			1	45					1mar15_PWD_m1	PWD male	PWD	male	Musc	M.musculus					0.365853658536585				78	1
14dec17_18nov17_WSB_f3_sp1_27_rev	82	11.5334	0.14114	20	14dec17_18nov17_WSB_f3_sp1_27_rev_20	1	0			1	30					18nov17_WSB_f3	WSB female	WSB	female	Dom	M.musculus					0.365853658536585				52	0
5aug17_14jul17_MSM_f1_sp1_24_rev	112	3.3025	0.029597	12	5aug17_14jul17_MSM_f1_sp1_24_rev_12	1	0			1	41					14jul17_MSM_f1	MSM female	MSM	female	Mol	M.musculus					0.366071428571429				71	0
15mar16_16jan16_G_f1_sp1_6_rev	142	6.911	0.048606	2	15mar16_16jan16_G_f1_sp1_6_rev_2	1	0			1	52					16jan16_G_f1	G female	G	female	Dom	M.musculus					0.366197183098592				90	0
27aug15_12jun15_WSB_m2_sp1_18_rev	71	2.0339	0.028644	7	27aug15_12jun15_WSB_m2_sp1_18_rev_7	1	0			1	26					12jun15_WSB_m2	WSB male	WSB	male	Dom	M.musculus					0.366197183098592				45	0
1mar18_1feb18_KAZ_f3_sp1_1_rev	101	6.6584	0.065872	7	1mar18_1feb18_KAZ_f3_sp1_1_rev_7	1	0			1	37					1feb18_KAZ_f3	KAZ female	KAZ	female	Musc	M.musculus					0.366336633663366				64	0
22jul19_26oct18_SKIVE_f3_sp1_12.1_rev	101	7.5346	0.074463	17	22jul19_26oct18_SKIVE_f3_sp1_12.1_rev_17	1	0			1	37					26oct18_SKIVE_f3	SKIVE female	SKIVE	female	Musc	M.musculus					0.36633663366336633				64	0
29nov17_16nov17_MSM_f1_sp1_28_rev	109	4.6089	0.042416	10	29nov17_16nov17_MSM_f1_sp1_28_rev_10	1	0			1	40					16nov17_MSM_f1	MSM female	MSM	female	Mol	M.musculus					0.36697247706422				69	0
12may15_30sep14_G_m5_sp1_14_rev	98	2.987	0.030425	1	12may15_30sep14_G_m5_sp1_14_rev_1	1	0			1	36					30sep14_G_m5	G male	G	male	Dom	M.musculus					0.36734693877551				62	0
27jul19_26oct18_SKIVE_f2_sp1_3.2_rev	98	5.4055	0.055241	7	27jul19_26oct18_SKIVE_f2_sp1_3.2_rev_7	1	0			1	36					26oct18_SKIVE_f2	SKIVE female	SKIVE	female	Musc	M.musculus					0.3673469387755102				62	0
7mar15_1mar15_PWD_m1_sp4_4_rev	68	3.0769	0.045173	1	7mar15_1mar15_PWD_m1_sp4_4_rev_1	1	0			1	25					1mar15_PWD_m1	PWD male	PWD	male	Musc	M.musculus					0.367647058823529				43	1
27jul19_26oct18_SKIVE_f1_sp1_12_rev	87	4.7856	0.055043	22	27jul19_26oct18_SKIVE_f1_sp1_12_rev_22	1	0			1	32					26oct18_SKIVE_f1	SKIVE female	SKIVE	female	Musc	M.musculus					0.367816091954023				55	0
12dec17_18nov17_WSB_f2_sp1_20_rev	125	4.4154	0.03531	15	12dec17_18nov17_WSB_f2_sp1_20_rev_15	1	0			1	46					18nov17_WSB_f2	WSB female	WSB	female	Dom	M.musculus					0.368				79	0
23jul19_28sep18_CZECH_m2_sp1_11_rev	95	5.1965	0.05469	2	23jul19_28sep18_CZECH_m2_sp1_11_rev_2	1	0			1	35					28sep18_CZECH_m2	CZECH male	CZECH	male	Musc	M.musculus					0.368421052631579				60	0
14dec17_18nov17_WSB_f3_sp1_11_rev	122	5.9625	0.048759	5	14dec17_18nov17_WSB_f3_sp1_11_rev_5	1	0			1	45					18nov17_WSB_f3	WSB female	WSB	female	Dom	M.musculus					0.368852459016393				77	0
9apr18_1feb18_LEW_f1_sp1_9_rev	111	7.1254	0.064285	17	9apr18_1feb18_LEW_f1_sp1_9_rev_17	1	0			1	41					1feb18_LEW_f1	LEW female	LEW	female	Dom	M.musculus					0.369369369369369				70	0
12dec17_18nov17_WSB_f2_sp1_3_rev	46	3.3786	0.073635	17	12dec17_18nov17_WSB_f2_sp1_3_rev_17	1	0			1	17					18nov17_WSB_f2	WSB female	WSB	female	Dom	M.musculus					0.369565217391304				29	0
8jun15_23apr15_PWD_f2_sp1_17_rev	119	3.3876	0.028563	21	8jun15_23apr15_PWD_f2_sp1_17_rev_21	1	0			1	44					23apr15_PWD_f2	PWD female	PWD	female	Musc	M.musculus					0.369747899159664				75	0
24may17_17mar16_G_f5_sp1_11_rev	73	3.6066	0.049695	5	24may17_17mar16_G_f5_sp1_11_rev_5	1	0			1	27					17mar16_G_f5	G female	G	female	Dom	M.musculus					0.36986301369863				46	0
17nov16_17mar16_G_f1_sp1_15_rev	170	0.29851	0.0017513	8	17nov16_17mar16_G_f1_sp1_15_rev_8	1	0			1	63					17mar16_G_f1	G female	G	female	Dom	M.musculus					0.370588235294118				107	0
19jan17_4jan17_LEW_f7_sp1_32_rev	62	0.30769	0.0049598	2	19jan17_4jan17_LEW_f7_sp1_32_rev_2	1	0			1	23					4jan17_LEW_f7	LEW female	LEW	female	Dom	M.musculus					0.370967741935484				39	0
5aug17_14jul17_MSM_f1_sp1_4_rev	62	4.1388	0.066824	10	5aug17_14jul17_MSM_f1_sp1_4_rev_10	1	0			1	23					14jul17_MSM_f1	MSM female	MSM	female	Mol	M.musculus					0.370967741935484				39	0
1mar18_1feb18_KAZ_f3_sp1_3_rev	97	7.1423	0.073635	5	1mar18_1feb18_KAZ_f3_sp1_3_rev_5	1	0			1	36					1feb18_KAZ_f3	KAZ female	KAZ	female	Musc	M.musculus					0.371134020618557				61	0
11dec17_18nov17_WSB_f1_sp1_7_rev	78	7.0991	0.091361	4	11dec17_18nov17_WSB_f1_sp1_7_rev_4	1	0			1	29					18nov17_WSB_f1	WSB female	WSB	female	Dom	M.musculus					0.371794871794872				49	0
21nov17_16nov17_MSM_f3_sp1_19_rev	121	9.4244	0.07819	3	21nov17_16nov17_MSM_f3_sp1_19_rev_3	1	0			1	45					16nov17_MSM_f3	MSM female	MSM	female	Mol	M.musculus					0.371900826446281				76	0
15mar16_16jan16_G_f1_sp1_9_rev	86	3.7248	0.043405	11	15mar16_16jan16_G_f1_sp1_9_rev_11	1	0			1	32					16jan16_G_f1	G female	G	female	Dom	M.musculus					0.372093023255814				54	0
19may15_31mar15_WSB_m1_sp1_21.2_rev	86	3.4185	0.039936	12	19may15_31mar15_WSB_m1_sp1_21.2_rev_12	1	0			1	32					31mar15_WSB_m1	WSB male	WSB	male	Dom	M.musculus					0.372093023255814				54	0
10jun15_24mar15_G_m1_sp1_16.1_rev	94	3.2195	0.034097	4	10jun15_24mar15_G_m1_sp1_16.1_rev_4	1	0			1	35				stange twist t end	24mar15_G_m1	G male	G	male	Dom	M.musculus					0.372340425531915				59	0
15mar17_13jan17_LEW_f3_sp1_21_rev	94	3.3293	0.035271	8	15mar17_13jan17_LEW_f3_sp1_21_rev_8	1	0			1	35					13jan17_LEW_f3	LEW female	LEW	female	Dom	M.musculus					0.372340425531915				59	0
5jun18_21may18_KAZ_m2_sp1_12_rev	51	2.8125	0.055334	17	5jun18_21may18_KAZ_m2_sp1_12_rev_17	1	0			1	19					21may18_KAZ_m2	KAZ male	KAZ	male	Musc	M.musculus					0.372549019607843				32	0
21nov17_16nov17_MSM_f3_sp1_17_rev	212	6.7577	0.031887	2	21nov17_16nov17_MSM_f3_sp1_17_rev_2	1	0			1	79					16nov17_MSM_f3	MSM female	MSM	female	Mol	M.musculus					0.372641509433962				133	0
6jun18_13jan17_LEW_f2_sp1_1_rev	118	4.9898	0.04241	18	6jun18_13jan17_LEW_f2_sp1_1_rev_18	1	0			1	44					13jan17_LEW_f2	LEW female	LEW	female	Dom	M.musculus					0.372881355932203				74	0
15mar17_13jan17_LEW_f3_sp1_1_rev	75	2.896	0.038641	7	15mar17_13jan17_LEW_f3_sp1_1_rev_7	1	0			1	28					13jan17_LEW_f3	LEW female	LEW	female	Dom	M.musculus					0.373333333333333				47	0
17feb15_13oct14_G_f2_sp1_16_rev	99	5.7091	0.05766	16	17feb15_13oct14_G_f2_sp1_16_rev_16	1	0			1	37					13oct14_G_f2	G female	G	female	Dom	M.musculus					0.373737373737374				62	0
18sep19_19aug19_SKIVE_m2_sp1_11_rev	99	4.4605	0.045269	4	18sep19_19aug19_SKIVE_m2_sp1_11_rev_4	1	0			1	37					19aug19_SKIVE_m2	SKIVE male	SKIVE	male	Musc	M.musculus					0.373737373737374				62	1
27jul19_26oct18_SKIVE_f1_sp1_15.2_rev	107	5.068	0.047183	5	27jul19_26oct18_SKIVE_f1_sp1_15.2_rev_5	1	0			1	40					26oct18_SKIVE_f1	SKIVE female	SKIVE	female	Musc	M.musculus					0.37383177570093457				67	0
13mar15_28feb15_PWD_f2_sp1_38_rev	115	4.7801	0.041415	14	13mar15_28feb15_PWD_f2_sp1_38_rev_14	1	0			1	43					28feb15_PWD_f2	PWD female	PWD	female	Musc	M.musculus					0.373913043478261				72	0
26dec17_18nov17_WSB_f4_sp1_18_rev	115	3.4375	0.029801	22	26dec17_18nov17_WSB_f4_sp1_18_rev_22	1	0			1	43					18nov17_WSB_f4	WSB female	WSB	female	Dom	M.musculus					0.373913043478261				72	0
1mar16_20feb16_G_f3_sp1_14_rev	56	3.3825	0.060062	9	1mar16_20feb16_G_f3_sp1_14_rev_9	1	0			1	21					20feb16_G_f3	G female	G	female	Dom	M.musculus					0.375				35	0
24may17_17mar16_G_f5_sp1_9_rev	88	5.9491	0.067333	17	24may17_17mar16_G_f5_sp1_9_rev_17	1	0			1	33					17mar16_G_f5	G female	G	female	Dom	M.musculus					0.375				55	0
1mar18_1feb18_KAZ_f3_sp1_3_rev	72	4.4505	0.062211	18	1mar18_1feb18_KAZ_f3_sp1_3_rev_18	1	0			1	27					1feb18_KAZ_f3	KAZ female	KAZ	female	Musc	M.musculus					0.375				45	0
15mar17_13jan17_LEW_f3_sp1_15_rev	120	3.3752	0.028179	8	15mar17_13jan17_LEW_f3_sp1_15_rev_8	1	0			1	45					13jan17_LEW_f3	LEW female	LEW	female	Dom	M.musculus					0.375				75	0
18jul19_1mar19_MOLF_m1_sp1_15_rev	80	2.7897	0.034859	11	18jul19_1mar19_MOLF_m1_sp1_15_rev_11	1	0			1	30					1mar19_MOLF_m1	MOLF male	MOLF	male	Mol	M.musculus					0.375				50	0
29nov16_13nov16_MSM_m2_sp1_21_rev	120	3.2353	0.026983	5	29nov16_13nov16_MSM_m2_sp1_21_rev_5	1	0			1	45					13nov16_MSM_m2	MSM male	MSM	male	Mol	M.musculus					0.375				75	1
4dec17_16nov17_MSM_f2_sp1_11_rev	112	3.7836	0.033812	5	4dec17_16nov17_MSM_f2_sp1_11_rev_5	1	0			1	42					16nov17_MSM_f2	MSM female	MSM	female	Mol	M.musculus					0.375				70	0
20jul15_18may15_PWD_m1_sp1_20.2_rev	80	3.0103	0.037837	6	20jul15_18may15_PWD_m1_sp1_20.2_rev_6	1	0			1	30					18may15_PWD_m1	PWD male	PWD	male	Musc	M.musculus					0.375				50	1
14dec17_18nov17_WSB_f3_sp1_16_rev	80	6.4868	0.080774	11	14dec17_18nov17_WSB_f3_sp1_16_rev_11	1	0			1	30					18nov17_WSB_f3	WSB female	WSB	female	Dom	M.musculus					0.375				50	0
12dec17_18nov17_WSB_f2_sp1_5_rev	109	4.7658	0.043759	8	12dec17_18nov17_WSB_f2_sp1_5_rev_8	1	0			1	41					18nov17_WSB_f2	WSB female	WSB	female	Dom	M.musculus					0.376146788990826				68	0
5jun18_21may18_KAZ_m2_sp1_13_rev	93	5.0988	0.05472	2	5jun18_21may18_KAZ_m2_sp1_13_rev_2	1	0			1	35					21may18_KAZ_m2	KAZ male	KAZ	male	Musc	M.musculus					0.376344086021505				58	0
2jul17_20dec16_LEW_m2_sp1_11_rev	93	3.2836	0.035251	14	2jul17_20dec16_LEW_m2_sp1_11_rev_14	1	0			1	35					20dec16_LEW_m2	LEW male	LEW	male	Dom	M.musculus					0.376344086021505				58	0
2jul17_20dec16_LEW_m3_sp1_14_rev	93	4.9225	0.052737	6	2jul17_20dec16_LEW_m3_sp1_14_rev_6	1	0			1	35					20dec16_LEW_m3	LEW male	LEW	male	Dom	M.musculus					0.376344086021505				58	0
5aug17_14jul17_MSM_f1_sp1_9_rev	186	5.3921	0.02894	7	5aug17_14jul17_MSM_f1_sp1_9_rev_7	1	0			1	70				2 faint foci flanking	14jul17_MSM_f1	MSM female	MSM	female	Mol	M.musculus					0.376344086021505				116	0
6mar18_1feb18_LEW_m1_sp1_8.1_rev	77	4.4592	0.058089	15	6mar18_1feb18_LEW_m1_sp1_8.1_rev_15	1	0			1	29					1feb18_LEW_m1	LEW male	LEW	male	Dom	M.musculus					0.376623376623377				48	0
3mar15_13jan17_LEW_m1_sp1_23_rev	69	4.5599	0.065955	12	3mar15_13jan17_LEW_m1_sp1_23_rev_12	1	0			1	26					13jan17_LEW_m1	LEW male	LEW	male	Dom	M.musculus					0.376811594202899				43	0
27mar16_6mar16_G_m3_sp1_15.1_rev	53	5.3048	0.099838	13	27mar16_6mar16_G_m3_sp1_15.1_rev_13	1	0			1	20					6mar16_G_m3	G male	G	male	Dom	M.musculus					0.377358490566038				33	0
14mar16_16jan16_G_f1_sp1_1_rev	90	2.4242	0.026914	16	14mar16_16jan16_G_f1_sp1_1_rev_16	1	0			1	34					16jan16_G_f1	G female	G	female	Dom	M.musculus					0.377777777777778				56	0
26jan18_11jan18_KAZ_m3_sp1_25.1_rev	45	3.6364	0.081274	4	26jan18_11jan18_KAZ_m3_sp1_25.1_rev_4	1	0			1	17					11jan18_KAZ_m3	KAZ male	KAZ	male	Musc	M.musculus					0.377777777777778				28	0
12feb15_13oct14_G_f2_sp1_2_rev	119	7.2847	0.061037	17	12feb15_13oct14_G_f2_sp1_2_rev_17	1	0			1	45					13oct14_G_f2	G female	G	female	Dom	M.musculus					0.378151260504202				74	0
8feb17_20dec16_LEW_m1_sp1_5_rev	74	3.5767	0.048184	2	8feb17_20dec16_LEW_m1_sp1_5_rev_2	1	0			1	28					20dec16_LEW_m1	LEW male	LEW	male	Dom	M.musculus					0.378378378378378				46	0
29nov17_16nov17_MSM_f1_sp1_28_rev	74	3.3788	0.045387	7	29nov17_16nov17_MSM_f1_sp1_28_rev_7	1	0			1	28					16nov17_MSM_f1	MSM female	MSM	female	Mol	M.musculus					0.378378378378378				46	0
1mar18_1feb18_KAZ_f3_sp1_1_rev	103	2.9851	0.028904	2	1mar18_1feb18_KAZ_f3_sp1_1_rev_2	1	0			1	39					1feb18_KAZ_f3	KAZ female	KAZ	female	Musc	M.musculus					0.378640776699029				64	0
5aug17_14jul17_MSM_f1_sp1_19_rev	145	7.5998	0.052515	11	5aug17_14jul17_MSM_f1_sp1_19_rev_11	1	0			1	55				2 faint foci	14jul17_MSM_f1	MSM female	MSM	female	Mol	M.musculus					0.379310344827586				90	0
20jul15_18may15_PWD_m2_sp1_10.2_rev	87	4.9668	0.05716	18	20jul15_18may15_PWD_m2_sp1_10.2_rev_18	1	0			1	33					18may15_PWD_m2	PWD male	PWD	male	Musc	M.musculus					0.379310344827586				54	1
27mar16_6mar16_G_m1_sp1_10_rev	79	3.3554	0.04223	4	27mar16_6mar16_G_m1_sp1_10_rev_4	1	0			1	30					6mar16_G_m1	G male	G	male	Dom	M.musculus					0.379746835443038				49	0
27mar16_6mar16_G_m3_sp1_15.2_rev	79	5.7352	0.072337	1	27mar16_6mar16_G_m3_sp1_15.2_rev_1	1	0			1	30					6mar16_G_m3	G male	G	male	Dom	M.musculus					0.379746835443038				49	0
26jan18_11jan18_KAZ_m3_sp1_4_rev	79	5.0565	0.064347	8	26jan18_11jan18_KAZ_m3_sp1_4_rev_8	1	0			1	30					11jan18_KAZ_m3	KAZ male	KAZ	male	Musc	M.musculus					0.379746835443038				49	0
10jun15_24mar15_G_m1_sp1_15_rev	92	1.8182	0.019777	14	10jun15_24mar15_G_m1_sp1_15_rev_14	1	0			1	35					24mar15_G_m1	G male	G	male	Dom	M.musculus					0.380434782608696				57	0
12jul15_12jun15_WSB_m1_sp1_4.2_rev	92	2.3881	0.025915	15	12jul15_12jun15_WSB_m1_sp1_4.2_rev_15	1	0			1	35					12jun15_WSB_m1	WSB male	WSB	male	Dom	M.musculus					0.380434782608696				57	0
19jan17_4jan17_LEW_f7_sp1_3_rev	84	3.5348	0.042184	10	19jan17_4jan17_LEW_f7_sp1_3_rev_10	1	0			1	32					4jan17_LEW_f7	LEW female	LEW	female	Dom	M.musculus					0.380952380952381				52	0
15mar17_13jan17_LEW_f3_sp1_9_rev	97	3.8885	0.040183	5	15mar17_13jan17_LEW_f3_sp1_9_rev_5	1	0			1	37					13jan17_LEW_f3	LEW female	LEW	female	Dom	M.musculus					0.381443298969072				60	0
12may15_30sep14_G_m5_sp1_14_rev	89	5.4985	0.061877	3	12may15_30sep14_G_m5_sp1_14_rev_3	1	0			1	34				small faint flanking foci	30sep14_G_m5	G male	G	male	Dom	M.musculus					0.382022471910112				55	0
1mar18_1feb18_KAZ_f3_sp1_3_rev	68	4.7761	0.070057	8	1mar18_1feb18_KAZ_f3_sp1_3_rev_8	1	0			1	26					1feb18_KAZ_f3	KAZ female	KAZ	female	Musc	M.musculus					0.382352941176471				42	0
8feb18_1feb18_KAZ_f1_sp1_3_rev	102	2.3729	0.023224	13	8feb18_1feb18_KAZ_f1_sp1_3_rev_13	1	0			1	39					1feb18_KAZ_f1	KAZ female	KAZ	female	Musc	M.musculus					0.382352941176471				63	0
13sep18_28jun18_MOLF_m1_sp1_11_rev	102	5.3419	0.052299	1	13sep18_28jun18_MOLF_m1_sp1_11_rev_1	1	0			1	39					28jun18_MOLF_m1	MOLF male	MOLF	male	Mol	M.musculus					0.382352941176471				63	0
14dec17_18nov17_WSB_f3_sp1_9_rev	68	2.623	0.038526	6	14dec17_18nov17_WSB_f3_sp1_9_rev_6	1	0			1	26					18nov17_WSB_f3	WSB female	WSB	female	Dom	M.musculus					0.382352941176471				42	0
8feb17_20dec16_LEW_m1_sp1_7_rev	47	5.3585	0.11469	9	8feb17_20dec16_LEW_m1_sp1_7_rev_9	1	0			1	18					20dec16_LEW_m1	LEW male	LEW	male	Dom	M.musculus					0.382978723404255				29	0
8jun15_23apr15_PWD_f2_sp1_10_rev	141	5.9403	0.042242	11	8jun15_23apr15_PWD_f2_sp1_10_rev_11	1	0			1	54					23apr15_PWD_f2	PWD female	PWD	female	Musc	M.musculus					0.382978723404255				87	0
27jul19_26oct18_SKIVE_f2_sp1_26_rev	94	4.291	0.045802	27	27jul19_26oct18_SKIVE_f2_sp1_26_rev_27	1	0			1	36					26oct18_SKIVE_f2	SKIVE female	SKIVE	female	Musc	M.musculus					0.3829787234042553				58	0
14dec17_18nov17_WSB_f3_sp1_18_rev	112	5.0401	0.044862	11	14dec17_18nov17_WSB_f3_sp1_18_rev_11	1	0			1	43					18nov17_WSB_f3	WSB female	WSB	female	Dom	M.musculus					0.383928571428571				69	0
22jul19_26oct18_SKIVE_f3_sp1_22_rev	65	3.0303	0.046815	26	22jul19_26oct18_SKIVE_f3_sp1_22_rev_26	1	0			1	25					26oct18_SKIVE_f3	SKIVE female	SKIVE	female	Musc	M.musculus					0.38461538461538464				40	0
12may15_30sep14_G_m5_sp1_10_rev	65	5.7269	0.088447	6	12may15_30sep14_G_m5_sp1_10_rev_6	1	0			1	25					30sep14_G_m5	G male	G	male	Dom	M.musculus					0.384615384615385				40	0
15mar17_13jan17_LEW_f3_sp1_22_rev	91	4.2749	0.046869	20	15mar17_13jan17_LEW_f3_sp1_22_rev_20	1	0			1	35					13jan17_LEW_f3	LEW female	LEW	female	Dom	M.musculus					0.384615384615385				56	0
21nov17_16nov17_MSM_f3_sp1_9_rev	91	3.9415	0.043108	7	21nov17_16nov17_MSM_f3_sp1_9_rev_7	1	0			1	35					16nov17_MSM_f3	MSM female	MSM	female	Mol	M.musculus					0.384615384615385				56	0
8feb18_1feb18_KAZ_f1_sp1_10_rev	135	4.5666	0.033939	7	8feb18_1feb18_KAZ_f1_sp1_10_rev_7	1	0			1	52					1feb18_KAZ_f1	KAZ female	KAZ	female	Musc	M.musculus					0.385185185185185				83	0
15mar17_13jan17_LEW_f3_sp1_13_rev	96	5.6216	0.058337	5	15mar17_13jan17_LEW_f3_sp1_13_rev_5	1	0			1	37					13jan17_LEW_f3	LEW female	LEW	female	Dom	M.musculus					0.385416666666667				59	0
10jun19_31may19_SKIVE_f6_sp1_60_rev	96	3.4195	0.035715	20	10jun19_31may19_SKIVE_f6_sp1_60_rev_20	1	0			1	37					31may19_SKIVE_f6	SKIVE female	SKIVE	female	Musc	M.musculus					0.385416666666667				59	0
5jun18_21may18_KAZ_m2_sp1_8.1_rev	83	3.3333	0.0401	2	5jun18_21may18_KAZ_m2_sp1_8.1_rev_2	1	0			1	32					21may18_KAZ_m2	KAZ male	KAZ	male	Musc	M.musculus					0.385542168674699				51	0
15mar16_16jan16_G_f1_sp1_4_rev	114	7.3063	0.064006	25	15mar16_16jan16_G_f1_sp1_4_rev_25	1	0			1	44					16jan16_G_f1	G female	G	female	Dom	M.musculus					0.385964912280702				70	0
4dec17_16nov17_MSM_f2_sp1_16_rev	145	3.9898	0.027429	3	4dec17_16nov17_MSM_f2_sp1_16_rev_3	1	0			1	56					16nov17_MSM_f2	MSM female	MSM	female	Mol	M.musculus					0.386206896551724				89	0
30jun17_4jan17_LEW_f3_sp1_12_rev	88	5.2668	0.059823	10	30jun17_4jan17_LEW_f3_sp1_12_rev_10	1	0			1	34	75				4jan17_LEW_f3	LEW female	LEW	female	Dom	M.musculus					0.386363636363636	0.852272727272727			54	0
27jul19_26oct18_SKIVE_f2_sp1_27_rev	88	6.3031	0.071645	1	27jul19_26oct18_SKIVE_f2_sp1_27_rev_1	1	0			1	34					26oct18_SKIVE_f2	SKIVE female	SKIVE	female	Musc	M.musculus					0.38636363636363635				54	0
2apr15_28feb15_PWD_f3_sp1_3_rev	75	7.0474	0.094427	18	2apr15_28feb15_PWD_f3_sp1_3_rev_18	1	0			1	29					28feb15_PWD_f3	PWD female	PWD	female	Musc	M.musculus					0.386666666666667				46	0
1mar16_20feb16_G_f3_sp1_14_rev	93	4.3049	0.046136	18	1mar16_20feb16_G_f3_sp1_14_rev_18	1	0			1	36					20feb16_G_f3	G female	G	female	Dom	M.musculus					0.387096774193548				57	0
5jun18_21may18_KAZ_m2_sp1_10.1_rev	62	5.1394	0.083116	11	5jun18_21may18_KAZ_m2_sp1_10.1_rev_11	1	0			1	24					21may18_KAZ_m2	KAZ male	KAZ	male	Musc	M.musculus					0.387096774193548				38	0
13sep18_28jun18_MOLF_m1_sp1_13.1_rev	62	4.6486	0.075105	5	13sep18_28jun18_MOLF_m1_sp1_13.1_rev_5	1	0			1	24					28jun18_MOLF_m1	MOLF male	MOLF	male	Mol	M.musculus					0.387096774193548				38	0
12dec17_18nov17_WSB_f2_sp1_8_rev	62	4.7196	0.076213	20	12dec17_18nov17_WSB_f2_sp1_8_rev_20	1	0			1	24					18nov17_WSB_f2	WSB female	WSB	female	Dom	M.musculus					0.387096774193548				38	0
14dec17_18nov17_WSB_f3_sp1_31_rev	124	4.9769	0.040164	7	14dec17_18nov17_WSB_f3_sp1_31_rev_7	1	0			1	48					18nov17_WSB_f3	WSB female	WSB	female	Dom	M.musculus					0.387096774193548				76	0
12dec17_18nov17_WSB_f2_sp1_2_rev	67	2	0.030007	16	12dec17_18nov17_WSB_f2_sp1_2_rev_16	1	0			1	26					18nov17_WSB_f2	WSB female	WSB	female	Dom	M.musculus					0.388059701492537				41	0
26jan18_11jan18_KAZ_m3_sp1_6_rev	85	1.4706	0.01727	8	26jan18_11jan18_KAZ_m3_sp1_6_rev_8	1	0			1	33					11jan18_KAZ_m3	KAZ male	KAZ	male	Musc	M.musculus					0.388235294117647				52	0
17feb15_13oct14_G_f2_sp1_40_rev	103	6.646	0.064399	9	17feb15_13oct14_G_f2_sp1_40_rev_9	1	0			1	40					13oct14_G_f2	G female	G	female	Dom	M.musculus					0.388349514563107				63	0
9mar16_22feb16_G_m1_sp1_18_rev	103	5.228	0.050749	1	9mar16_22feb16_G_m1_sp1_18_rev_1	1	0			1	40					22feb16_G_m1	G male	G	male	Dom	M.musculus					0.388349514563107				63	0
27mar16_6mar16_G_m2_sp1_4_rev	72	2.4242	0.033659	2	27mar16_6mar16_G_m2_sp1_4_rev_2	1	0			1	28					6mar16_G_m2	G male	G	male	Dom	M.musculus					0.388888888888889				44	0
18jul19_1mar19_MOLF_m1_sp1_16_rev	54	2.6471	0.049042	14	18jul19_1mar19_MOLF_m1_sp1_16_rev_14	1	0			1	21					1mar19_MOLF_m1	MOLF male	MOLF	male	Mol	M.musculus					0.388888888888889				33	0
23jul19_28sep18_CZECH_m2_sp1_13.2_rev	77	5.8273	0.075645	13	23jul19_28sep18_CZECH_m2_sp1_13.2_rev_13	1	0			1	30					28sep18_CZECH_m2	CZECH male	CZECH	male	Musc	M.musculus					0.38961038961039				47	0
26jan18_11jan18_KAZ_m3_sp1_2_rev	82	3.2836	0.040216	13	26jan18_11jan18_KAZ_m3_sp1_2_rev_13	1	0			1	32					11jan18_KAZ_m3	KAZ male	KAZ	male	Musc	M.musculus					0.390243902439024				50	0
19jan17_4jan17_LEW_f6_sp1_11_rev	64	3.8768	0.060266	20	19jan17_4jan17_LEW_f6_sp1_11_rev_20	1	0			1	25					4jan17_LEW_f6	LEW female	LEW	female	Dom	M.musculus					0.390625				39	0
2jul17_20dec16_LEW_m3_sp1_10_rev	87	3.7601	0.043448	12	2jul17_20dec16_LEW_m3_sp1_10_rev_12	1	0			1	34					20dec16_LEW_m3	LEW male	LEW	male	Dom	M.musculus					0.390804597701149				53	0
5aug17_14jul17_MSM_f1_sp1_26_rev	87	3.9072	0.045052	9	5aug17_14jul17_MSM_f1_sp1_26_rev_9	1	0			1	34					14jul17_MSM_f1	MSM female	MSM	female	Mol	M.musculus					0.390804597701149				53	0
8jun15_23apr15_PWD_f2_sp1_16_rev	87	5.4179	0.062618	17	8jun15_23apr15_PWD_f2_sp1_16_rev_17	1	0			1	34					23apr15_PWD_f2	PWD female	PWD	female	Musc	M.musculus					0.390804597701149				53	0
13sep18_28jun18_MOLF_m1_sp1_10.1_rev	115	2.1875	0.019002	15	13sep18_28jun18_MOLF_m1_sp1_10.1_rev_15	1	0			1	45					28jun18_MOLF_m1	MOLF male	MOLF	male	Mol	M.musculus					0.391304347826087				70	0
7mar15_1mar15_PWD_m1_sp4_16_rev	92	4.2881	0.046449	14	7mar15_1mar15_PWD_m1_sp4_16_rev_14	1	0			1	36					1mar15_PWD_m1	PWD male	PWD	male	Musc	M.musculus					0.391304347826087				56	1
27aug15_12jun15_WSB_m2_sp1_4_rev	92	3.8578	0.041711	17	27aug15_12jun15_WSB_m2_sp1_4_rev_17	1	0			1	36					12jun15_WSB_m2	WSB male	WSB	male	Dom	M.musculus					0.391304347826087				56	0
12oct18_26sep18_CZECH_m1_sp1_1_rev	97	9.582	0.098315	12	12oct18_26sep18_CZECH_m1_sp1_1_rev_12	1	0			1	38					26sep18_CZECH_m1	CZECH male	CZECH	male	Musc	M.musculus					0.391752577319588				59	0
5jun18_21may18_KAZ_m2_sp1_5.1_rev	74	3.4571	0.046432	2	5jun18_21may18_KAZ_m2_sp1_5.1_rev_2	1	0			1	29					21may18_KAZ_m2	KAZ male	KAZ	male	Musc	M.musculus					0.391891891891892				45	0
14dec17_18nov17_WSB_f3_sp1_12_rev	74	3.3309	0.045178	7	14dec17_18nov17_WSB_f3_sp1_12_rev_7	1	0			1	29					18nov17_WSB_f3	WSB female	WSB	female	Dom	M.musculus					0.391891891891892				45	0
17nov16_17mar16_G_f1_sp1_9_rev	130	2.8169	0.021625	14	17nov16_17mar16_G_f1_sp1_9_rev_14	1	0			1	51					17mar16_G_f1	G female	G	female	Dom	M.musculus					0.392307692307692				79	0
16feb16_17mar16_G_f4_sp1_1_rev	107	1.875	0.017469	15	16feb16_17mar16_G_f4_sp1_1_rev_15	1	0			1	42					17mar16_G_f4	G female	G	female	Dom	M.musculus					0.392523364485981				65	0
2jul17_20dec16_LEW_m2_sp1_4_rev	84	3.7299	0.044345	5	2jul17_20dec16_LEW_m2_sp1_4_rev_5	1	0			1	33					20dec16_LEW_m2	LEW male	LEW	male	Dom	M.musculus					0.392857142857143				51	0
19jan17_4jan17_LEW_f6_sp1_12_rev	84	1.8182	0.021532	12	19jan17_4jan17_LEW_f6_sp1_12_rev_12	1	0			1	33					4jan17_LEW_f6	LEW female	LEW	female	Dom	M.musculus					0.392857142857143				51	0
19jan17_4jan17_LEW_f6_sp1_25_rev	84	3.1914	0.038074	15	19jan17_4jan17_LEW_f6_sp1_25_rev_15	1	0			1	33					4jan17_LEW_f6	LEW female	LEW	female	Dom	M.musculus					0.392857142857143				51	0
19jan17_4jan17_LEW_f6_sp1_3_rev	84	2.2222	0.026553	1	19jan17_4jan17_LEW_f6_sp1_3_rev_1	1	0			1	33					4jan17_LEW_f6	LEW female	LEW	female	Dom	M.musculus					0.392857142857143				51	0
14dec17_18nov17_WSB_f3_sp1_17_rev	89	2.6866	0.030183	14	14dec17_18nov17_WSB_f3_sp1_17_rev_14	1	0			1	35					18nov17_WSB_f3	WSB female	WSB	female	Dom	M.musculus					0.393258426966292				54	0
14dec17_18nov17_WSB_f3_sp1_2_rev	89	4.5902	0.051477	1	14dec17_18nov17_WSB_f3_sp1_2_rev_1	1	0			1	35					18nov17_WSB_f3	WSB female	WSB	female	Dom	M.musculus					0.393258426966292				54	0
22jul19_26oct18_SKIVE_f3_sp1_14.1_rev	122	3.807	0.031317	8	22jul19_26oct18_SKIVE_f3_sp1_14.1_rev_8	1	0			1	48					26oct18_SKIVE_f3	SKIVE female	SKIVE	female	Musc	M.musculus					0.39344262295081966				74	0
17feb15_13oct14_G_f2_sp1_15_rev	94	2.9246	0.031073	8	17feb15_13oct14_G_f2_sp1_15_rev_8	1	0			1	37					13oct14_G_f2	G female	G	female	Dom	M.musculus					0.393617021276596				57	0
18sep19_19aug19_SKIVE_m2_sp1_1.1_rev	94	6.2967	0.066929	8	18sep19_19aug19_SKIVE_m2_sp1_1.1_rev_8	1	0			1	37				1 faint foci near end	19aug19_SKIVE_m2	SKIVE male	SKIVE	male	Musc	M.musculus					0.393617021276596				57	1
26jan18_11jan18_KAZ_m3_sp1_6_rev	99	4.4836	0.045351	9	26jan18_11jan18_KAZ_m3_sp1_6_rev_9	1	0			1	39					11jan18_KAZ_m3	KAZ male	KAZ	male	Musc	M.musculus					0.393939393939394				60	0
5aug17_14jul17_MSM_f1_sp1_17_rev	99	4.2219	0.042837	6	5aug17_14jul17_MSM_f1_sp1_17_rev_6	1	0			1	39					14jul17_MSM_f1	MSM female	MSM	female	Mol	M.musculus					0.393939393939394				60	0
11dec17_18nov17_WSB_f1_sp1_4_rev	99	3.1225	0.031679	9	11dec17_18nov17_WSB_f1_sp1_4_rev_9	1	0			1	39					18nov17_WSB_f1	WSB female	WSB	female	Dom	M.musculus					0.393939393939394				60	0
12dec17_18nov17_WSB_f2_sp1_20_rev	99	2.4242	0.024419	5	12dec17_18nov17_WSB_f2_sp1_20_rev_5	1	0			1	39					18nov17_WSB_f2	WSB female	WSB	female	Dom	M.musculus					0.393939393939394				60	0
2apr15_28feb15_PWD_f3_sp1_3_rev	71	8.5571	0.12012	21	2apr15_28feb15_PWD_f3_sp1_3_rev_21	1	0			1	28					28feb15_PWD_f3	PWD female	PWD	female	Musc	M.musculus					0.394366197183099				43	0
16feb16_17mar16_G_f4_sp1_7_rev	109	2.8571	0.026153	6	16feb16_17mar16_G_f4_sp1_7_rev_6	1	0			1	43					17mar16_G_f4	G female	G	female	Dom	M.musculus					0.394495412844037				66	0
26jan18_11jan18_KAZ_m3_sp1_1_rev	114	5.2523	0.04599	9	26jan18_11jan18_KAZ_m3_sp1_1_rev_9	1	0			1	45					11jan18_KAZ_m3	KAZ male	KAZ	male	Musc	M.musculus					0.394736842105263				69	0
26jan18_11jan18_KAZ_m3_sp1_21_rev	76	5.16	0.067526	13	26jan18_11jan18_KAZ_m3_sp1_21_rev_13	1	0			1	30					11jan18_KAZ_m3	KAZ male	KAZ	male	Musc	M.musculus					0.394736842105263				46	0
16feb16_17mar16_G_f4_sp1_10_rev	124	3.4974	0.028271	1	16feb16_17mar16_G_f4_sp1_10_rev_1	1	0			1	49					17mar16_G_f4	G female	G	female	Dom	M.musculus					0.395161290322581				75	0
26jan18_11jan18_KAZ_m3_sp1_9.1_rev	86	4.9291	0.057277	13	26jan18_11jan18_KAZ_m3_sp1_9.1_rev_13	1	0			1	34					11jan18_KAZ_m3	KAZ male	KAZ	male	Musc	M.musculus					0.395348837209302				52	0
13sep18_28jun18_MOLF_m1_sp1_20_rev	86	3.5294	0.041261	5	13sep18_28jun18_MOLF_m1_sp1_20_rev_5	1	0			1	34				faint foci near centromere	28jun18_MOLF_m1	MOLF male	MOLF	male	Mol	M.musculus					0.395348837209302				52	0
24may17_17mar16_G_f5_sp1_11_rev	91	3.3846	0.037279	4	24may17_17mar16_G_f5_sp1_11_rev_4	1	0			1	36					17mar16_G_f5	G female	G	female	Dom	M.musculus					0.395604395604396				55	0
12dec17_18nov17_WSB_f2_sp1_7_rev	48	0.83333	0.017226	4	12dec17_18nov17_WSB_f2_sp1_7_rev_4	1	0			1	19					18nov17_WSB_f2	WSB female	WSB	female	Dom	M.musculus					0.395833333333333				29	0
9aug15_23apr15_PWD_f2_sp1_6_rev	101	5.4848	0.054545	12	9aug15_23apr15_PWD_f2_sp1_6_rev_12	1	0			1	40					23apr15_PWD_f2	PWD female	PWD	female	Musc	M.musculus					0.396039603960396				61	0
27jul19_26oct18_SKIVE_f2_sp1_3.2_rev	106	6.5674	0.062173	10	27jul19_26oct18_SKIVE_f2_sp1_3.2_rev_10	1	0			1	42				2 other faint flanking foci	26oct18_SKIVE_f2	SKIVE female	SKIVE	female	Musc	M.musculus					0.39622641509433965				64	0
2jul17_20dec16_LEW_m2_sp1_5_rev	58	7.5649	0.13093	3	2jul17_20dec16_LEW_m2_sp1_5_rev_3	1	0			1	23					20dec16_LEW_m2	LEW male	LEW	male	Dom	M.musculus					0.396551724137931				35	0
24may17_17mar16_G_f5_sp1_11_rev	126	3.6405	0.028821	14	24may17_17mar16_G_f5_sp1_11_rev_14	1	0			1	50					17mar16_G_f5	G female	G	female	Dom	M.musculus					0.396825396825397				76	0
27jul19_26oct18_SKIVE_f1_sp1_23_rev	73	4.6913	0.06441	12	27jul19_26oct18_SKIVE_f1_sp1_23_rev_12	1	0			1	29					26oct18_SKIVE_f1	SKIVE female	SKIVE	female	Musc	M.musculus					0.3972602739726027				44	0
2jul17_20dec16_LEW_m2_sp1_8_rev	83	5.5377	0.067082	5	2jul17_20dec16_LEW_m2_sp1_8_rev_5	1	0			1	33					20dec16_LEW_m2	LEW male	LEW	male	Dom	M.musculus					0.397590361445783				50	0
30jun17_4jan17_LEW_f3_sp1_3_rev	83	3.7793	0.045733	14	30jun17_4jan17_LEW_f3_sp1_3_rev_14	1	0			1	33					4jan17_LEW_f3	LEW female	LEW	female	Dom	M.musculus					0.397590361445783				50	0
14dec17_18nov17_WSB_f3_sp1_19_rev	88	4.2385	0.048007	14	14dec17_18nov17_WSB_f3_sp1_19_rev_14	1	0			1	35					18nov17_WSB_f3	WSB female	WSB	female	Dom	M.musculus					0.397727272727273				53	0
30jun17_4jan17_LEW_f3_sp1_8_rev	98	5.3789	0.054877	10	30jun17_4jan17_LEW_f3_sp1_8_rev_10	1	0			1	39					4jan17_LEW_f3	LEW female	LEW	female	Dom	M.musculus					0.397959183673469				59	0
2jul17_20dec16_LEW_m2_sp1_16_rev	108	3.4286	0.031741	16	2jul17_20dec16_LEW_m2_sp1_16_rev_16	1	0			1	43					20dec16_LEW_m2	LEW male	LEW	male	Dom	M.musculus					0.398148148148148				65	0
19jan17_4jan17_LEW_f6_sp1_3_rev	115	1.2308	0.010696	18	19jan17_4jan17_LEW_f6_sp1_3_rev_18	1	0			1	46					4jan17_LEW_f6	LEW female	LEW	female	Dom	M.musculus					0.4				69	0
30jun17_4jan17_LEW_f3_sp1_6_rev	170	1.9178	0.011298	11	30jun17_4jan17_LEW_f3_sp1_6_rev_11	1	0			1	68					4jan17_LEW_f3	LEW female	LEW	female	Dom	M.musculus					0.4				102	0
8feb17_20dec16_LEW_m1_sp1_24.1_rev	55	6.2527	0.11336	6	8feb17_20dec16_LEW_m1_sp1_24.1_rev_6	1	0			1	22					20dec16_LEW_m1	LEW male	LEW	male	Dom	M.musculus					0.4				33	0
4dec17_16nov17_MSM_f2_sp1_18_rev	80	6.5059	0.081832	11	4dec17_16nov17_MSM_f2_sp1_18_rev_11	1	0			1	32					16nov17_MSM_f2	MSM female	MSM	female	Mol	M.musculus					0.4				48	0
9aug15_17apr15_PWD_f2_sp1_8_rev	120	6.1793	0.0514	16	9aug15_17apr15_PWD_f2_sp1_8_rev_16	1	0			1	48					17apr15_PWD_f2	PWD female	PWD	female	Musc	M.musculus					0.4				72	0
20jul15_18may15_PWD_m1_sp1_17_rev	75	3.0297	0.040641	13	20jul15_18may15_PWD_m1_sp1_17_rev_13	1	0			1	30					18may15_PWD_m1	PWD male	PWD	male	Musc	M.musculus					0.4				45	1
10jun19_31may19_SKIVE_f6_sp1_55_rev	125	1.5198	0.012184	10	10jun19_31may19_SKIVE_f6_sp1_55_rev_10	1	0			1	50					31may19_SKIVE_f6	SKIVE female	SKIVE	female	Musc	M.musculus					0.4				75	0
10jun19_31may19_SKIVE_f6_sp1_8_rev	75	2.1538	0.02876	16	10jun19_31may19_SKIVE_f6_sp1_8_rev_16	1	0			1	30					31may19_SKIVE_f6	SKIVE female	SKIVE	female	Musc	M.musculus					0.4				45	0
26dec17_18nov17_WSB_f4_sp1_5_rev	80	4.2563	0.053279	1	26dec17_18nov17_WSB_f4_sp1_5_rev_1	1	0			1	32					18nov17_WSB_f4	WSB female	WSB	female	Dom	M.musculus					0.4				48	0
12jul15_12jun15_WSB_m1_sp1_7.1_rev	90	4.5109	0.050136	18	12jul15_12jun15_WSB_m1_sp1_7.1_rev_18	1	0			1	36					12jun15_WSB_m1	WSB male	WSB	male	Dom	M.musculus					0.4				54	0
2aug15_8oct14_PWD_f4_sp1_11.2_rev	102	5.3655	0.05247	4	2aug15_8oct14_PWD_f4_sp1_11.2_rev_4	1	0			1	41					8oct14_PWD_f4	PWD female	PWD	female	Musc	M.musculus					0.401960784313726				61	0
17nov16_17mar16_G_f1_sp1_10_rev	97	3.7794	0.038921	10	17nov16_17mar16_G_f1_sp1_10_rev_10	1	0			1	39					17mar16_G_f1	G female	G	female	Dom	M.musculus					0.402061855670103				58	0
20aug15_22jun15_G_m1_sp2_15.2_rev	97	4.4327	0.045489	15	20aug15_22jun15_G_m1_sp2_15.2_rev_15	1	0			1	39					22jun15_G_m1	G male	G	male	Dom	M.musculus					0.402061855670103				58	0
27mar16_6mar16_G_m1_sp1_6_rev	97	3.7182	0.038411	13	27mar16_6mar16_G_m1_sp1_6_rev_13	1	0			1	39					6mar16_G_m1	G male	G	male	Dom	M.musculus					0.402061855670103				58	0
5jan19_27oct18_SKIVE_m2_sp1_11_rev	97	4.8087	0.04967	16	5jan19_27oct18_SKIVE_m2_sp1_11_rev_16	1	0			1	39					27oct18_SKIVE_m2	SKIVE male	SKIVE	male	Musc	M.musculus					0.402061855670103				58	1
20jul15_18may15_PWD_m2_sp1_17_rev	92	1.875	0.020468	1	20jul15_18may15_PWD_m2_sp1_17_rev_1	1	0			1	37					18may15_PWD_m2	PWD male	PWD	male	Musc	M.musculus					0.402173913043478				55	1
27jul19_26oct18_SKIVE_f2_sp1_3.2_rev	82	5.0929	0.062451	9	27jul19_26oct18_SKIVE_f2_sp1_3.2_rev_9	1	0			1	33					26oct18_SKIVE_f2	SKIVE female	SKIVE	female	Musc	M.musculus					0.4024390243902439				49	0
19jan17_4jan17_LEW_f6_sp1_25_rev	82	2.3188	0.028256	2	19jan17_4jan17_LEW_f6_sp1_25_rev_2	1	0			1	33					4jan17_LEW_f6	LEW female	LEW	female	Dom	M.musculus					0.402439024390244				49	0
14dec17_18nov17_WSB_f3_sp1_14_rev	82	3.8343	0.046746	17	14dec17_18nov17_WSB_f3_sp1_14_rev_17	1	0			1	33					18nov17_WSB_f3	WSB female	WSB	female	Dom	M.musculus					0.402439024390244				49	0
16nov16_17mar16_G_f5_sp1_9_rev	72	3.0556	0.042147	16	16nov16_17mar16_G_f5_sp1_9_rev_16	1	0			1	29				faint flanking foci	17mar16_G_f5	G female	G	female	Dom	M.musculus					0.402777777777778				43	0
24may17_17mar16_G_f5_sp1_15_rev	139	4.5714	0.032973	10	24may17_17mar16_G_f5_sp1_15_rev_10	1	0			1	56					17mar16_G_f5	G female	G	female	Dom	M.musculus					0.402877697841727				83	0
18sep19_19aug19_SKIVE_m2_sp1_19_rev	62	5.4722	0.087807	11	18sep19_19aug19_SKIVE_m2_sp1_19_rev_11	1	0			1	25					19aug19_SKIVE_m2	SKIVE male	SKIVE	male	Musc	M.musculus					0.403225806451613				37	1
5jan19_27oct18_SKIVE_m2_sp1_3.2_rev	62	3.6923	0.059873	15	5jan19_27oct18_SKIVE_m2_sp1_3.2_rev_15	1	0			1	25					27oct18_SKIVE_m2	SKIVE male	SKIVE	male	Musc	M.musculus					0.403225806451613				37	1
13sep18_28jun18_MOLF_m1_sp1_23_rev	104	1.9672	0.018836	5	13sep18_28jun18_MOLF_m1_sp1_23_rev_5	1	0			1	42					28jun18_MOLF_m1	MOLF male	MOLF	male	Mol	M.musculus					0.403846153846154				62	0
21nov17_16nov17_MSM_f3_sp1_9_rev	104	5.2606	0.050746	15	21nov17_16nov17_MSM_f3_sp1_9_rev_15	1	0			1	42					16nov17_MSM_f3	MSM female	MSM	female	Mol	M.musculus					0.403846153846154				62	0
14dec17_18nov17_WSB_f3_sp1_20_rev	104	3.1556	0.030371	13	14dec17_18nov17_WSB_f3_sp1_20_rev_13	1	0			1	42					18nov17_WSB_f3	WSB female	WSB	female	Dom	M.musculus					0.403846153846154				62	0
8feb18_1feb18_KAZ_f1_sp1_17_rev	99	2.7427	0.027793	4	8feb18_1feb18_KAZ_f1_sp1_17_rev_4	1	0			1	40					1feb18_KAZ_f1	KAZ female	KAZ	female	Musc	M.musculus					0.404040404040404				59	0
15mar16_16jan16_G_f1_sp1_7_rev	146	1.8919	0.012994	5	15mar16_16jan16_G_f1_sp1_7_rev_5	1	0			1	59					16jan16_G_f1	G female	G	female	Dom	M.musculus					0.404109589041096				87	0
13sep18_28jun18_MOLF_m1_sp1_21.1_rev	47	4.6007	0.097244	1	13sep18_28jun18_MOLF_m1_sp1_21.1_rev_1	1	0			1	19					28jun18_MOLF_m1	MOLF male	MOLF	male	Mol	M.musculus					0.404255319148936				28	0
26dec17_18nov17_WSB_f4_sp1_5_rev	79	3.8235	0.048186	4	26dec17_18nov17_WSB_f4_sp1_5_rev_4	1	0			1	32					18nov17_WSB_f4	WSB female	WSB	female	Dom	M.musculus					0.40506329113924				47	0
12may15_30sep14_G_m5_sp1_15.2_rev	74	0.85714	0.011596	10	12may15_30sep14_G_m5_sp1_15.2_rev_10	1	0			1	30					30sep14_G_m5	G male	G	male	Dom	M.musculus					0.405405405405405				44	0
3mar15_13jan17_LEW_m1_sp1_24.2_rev	74	4.4885	0.060621	15	3mar15_13jan17_LEW_m1_sp1_24.2_rev_15	1	0			1	30					13jan17_LEW_m1	LEW male	LEW	male	Dom	M.musculus					0.405405405405405				44	0
6mar18_1feb18_LEW_m1_sp1_6.2_rev	74	3.5294	0.04765	2	6mar18_1feb18_LEW_m1_sp1_6.2_rev_2	1	0			1	30					1feb18_LEW_m1	LEW male	LEW	male	Dom	M.musculus					0.405405405405405				44	0
11jan19_27oct18_SKIVE_m1_sp1_8.1_rev	111	3.1083	0.028037	6	11jan19_27oct18_SKIVE_m1_sp1_8.1_rev_6	1	0			1	45					27oct18_SKIVE_m1	SKIVE male	SKIVE	male	Musc	M.musculus					0.405405405405405				66	1
11dec17_18nov17_WSB_f1_sp1_3_rev	106	3.0556	0.028954	6	11dec17_18nov17_WSB_f1_sp1_3_rev_6	1	0			1	43					18nov17_WSB_f1	WSB female	WSB	female	Dom	M.musculus					0.405660377358491				63	0
20aug15_22jun15_G_m1_sp2_1.1_rev	86	4.3198	0.05042	5	20aug15_22jun15_G_m1_sp2_1.1_rev_5	1	0			1	35					22jun15_G_m1	G male	G	male	Dom	M.musculus					0.406976744186047				51	0
10jun19_31may19_SKIVE_f6_sp1_34_rev	81	2.6087	0.032083	3	10jun19_31may19_SKIVE_f6_sp1_34_rev_3	1	0			1	33					31may19_SKIVE_f6	SKIVE female	SKIVE	female	Musc	M.musculus					0.407407407407407				48	0
14dec17_18nov17_WSB_f3_sp1_18_rev	103	3.3838	0.032861	12	14dec17_18nov17_WSB_f3_sp1_18_rev_12	1	0			1	42					18nov17_WSB_f3	WSB female	WSB	female	Dom	M.musculus					0.407766990291262				61	0
26jan18_11jan18_KAZ_m3_sp1_16_rev	76	5.9812	0.078598	15	26jan18_11jan18_KAZ_m3_sp1_16_rev_15	1	0			1	31					11jan18_KAZ_m3	KAZ male	KAZ	male	Musc	M.musculus					0.407894736842105				45	0
2jul17_20dec16_LEW_m3_sp1_14_rev	98	3.1429	0.031984	10	2jul17_20dec16_LEW_m3_sp1_14_rev_10	1	0			1	40					20dec16_LEW_m3	LEW male	LEW	male	Dom	M.musculus					0.408163265306122				58	0
15mar17_13jan17_LEW_f3_sp1_26_rev	98	4.5312	0.046324	16	15mar17_13jan17_LEW_f3_sp1_26_rev_16	1	0			1	40					13jan17_LEW_f3	LEW female	LEW	female	Dom	M.musculus					0.408163265306122				58	0
20jul15_18may15_PWD_m2_sp1_13_rev	88	7.4854	0.085303	19	20jul15_18may15_PWD_m2_sp1_13_rev_19	1	0			1	36					18may15_PWD_m2	PWD male	PWD	male	Musc	M.musculus					0.409090909090909				52	1
27aug15_12jun15_WSB_m2_sp1_18_rev	105	3.8159	0.036235	8	27aug15_12jun15_WSB_m2_sp1_18_rev_8	1	0			1	43					12jun15_WSB_m2	WSB male	WSB	male	Dom	M.musculus					0.40952380952381				62	0
6mar18_1feb18_LEW_m1_sp1_7_rev	83	1.9718	0.0237	15	6mar18_1feb18_LEW_m1_sp1_7_rev_15	1	0			1	34					1feb18_LEW_m1	LEW male	LEW	male	Dom	M.musculus					0.409638554216867				49	0
14dec17_18nov17_WSB_f3_sp1_1_rev	144	2.9412	0.020431	5	14dec17_18nov17_WSB_f3_sp1_1_rev_5	1	0			1	59					18nov17_WSB_f3	WSB female	WSB	female	Dom	M.musculus					0.409722222222222				85	0
11jan19_27oct18_SKIVE_m1_sp1_12.1_rev	78	7.3254	0.093532	10	11jan19_27oct18_SKIVE_m1_sp1_12.1_rev_10	1	0			1	32					27oct18_SKIVE_m1	SKIVE male	SKIVE	male	Musc	M.musculus					0.41025641025641				46	1
8jun15_23apr15_PWD_f2_sp1_2_rev	134	7.2787	0.054316	7	8jun15_23apr15_PWD_f2_sp1_2_rev_7	1	0			1	55					23apr15_PWD_f2	PWD female	PWD	female	Musc	M.musculus					0.41044776119403				79	0
12dec17_18nov17_WSB_f2_sp1_4_rev	168	1.8182	0.010835	13	12dec17_18nov17_WSB_f2_sp1_4_rev_13	1	0			1	69					18nov17_WSB_f2	WSB female	WSB	female	Dom	M.musculus					0.410714285714286				99	0
8feb17_4jan17_LEW_f1_sp1_2_rev	73	2.8169	0.038781	13	8feb17_4jan17_LEW_f1_sp1_2_rev_13	1	0			1	30					4jan17_LEW_f1	LEW female	LEW	female	Dom	M.musculus					0.410958904109589				43	0
10jun15_24mar15_G_m1_sp1_15_rev	90	5.5647	0.061688	17	10jun15_24mar15_G_m1_sp1_15_rev_17	1	0			1	37					24mar15_G_m1	G male	G	male	Dom	M.musculus					0.411111111111111				53	0
4jun19_28sep18_MOLF_m1_sp1_2_rev	90	7.3915	0.082147	3	4jun19_28sep18_MOLF_m1_sp1_2_rev_3	1	0			1	37					28sep18_MOLF_m1	MOLF male	MOLF	male	Mol	M.musculus					0.411111111111111				53	0
29nov17_16nov17_MSM_f1_sp1_17_rev	90	7.1446	0.079046	6	29nov17_16nov17_MSM_f1_sp1_17_rev_6	1	0			1	37					16nov17_MSM_f1	MSM female	MSM	female	Mol	M.musculus					0.411111111111111				53	0
6jun18_13jan17_LEW_f2_sp1_10_rev	107	4.8722	0.045548	18	6jun18_13jan17_LEW_f2_sp1_10_rev_18	1	0			1	44					13jan17_LEW_f2	LEW female	LEW	female	Dom	M.musculus					0.411214953271028				63	0
14dec17_18nov17_WSB_f3_sp1_31_rev	107	4.3835	0.04086	14	14dec17_18nov17_WSB_f3_sp1_31_rev_14	1	0			1	44					18nov17_WSB_f3	WSB female	WSB	female	Dom	M.musculus					0.411214953271028				63	0
8jun15_23apr15_PWD_f2_sp1_3_rev	85	6.5108	0.076728	1	8jun15_23apr15_PWD_f2_sp1_3_rev_1	1	0			1	35					23apr15_PWD_f2	PWD female	PWD	female	Musc	M.musculus					0.411764705882353				50	0
27mar16_6mar16_G_m3_sp1_15.2_rev	80	4.1791	0.052507	9	27mar16_6mar16_G_m3_sp1_15.2_rev_9	1	0			1	33					6mar16_G_m3	G male	G	male	Dom	M.musculus					0.4125				47	0
2jul17_20dec16_LEW_m2_sp1_16_rev	80	5.7744	0.071784	19	2jul17_20dec16_LEW_m2_sp1_16_rev_19	1	0			1	33					20dec16_LEW_m2	LEW male	LEW	male	Dom	M.musculus					0.4125				47	0
13sep18_28jun18_MOLF_m1_sp1_23_rev	80	4.6875	0.058649	2	13sep18_28jun18_MOLF_m1_sp1_23_rev_2	1	0			1	33					28jun18_MOLF_m1	MOLF male	MOLF	male	Mol	M.musculus					0.4125				47	0
10jan18_13jan17_LEW_f1_sp1_18_rev	126	3.8331	0.030344	15	10jan18_13jan17_LEW_f1_sp1_18_rev_15	1	0			1	52					13jan17_LEW_f1	LEW female	LEW	female	Dom	M.musculus					0.412698412698413				74	0
10jun19_31may19_SKIVE_f6_sp1_60_rev	126	2.9057	0.023148	6	10jun19_31may19_SKIVE_f6_sp1_60_rev_6	1	0			1	52					31may19_SKIVE_f6	SKIVE female	SKIVE	female	Musc	M.musculus					0.412698412698413				74	0
6mar15_1mar15_PWD_m1_sp4_7_rev	109	6.7269	0.061925	7	6mar15_1mar15_PWD_m1_sp4_7_rev_7	1	0			1	45					1mar15_PWD_m1	PWD male	PWD	male	Musc	M.musculus					0.412844036697248				64	1
5aug17_14jul17_MSM_f1_sp1_26_rev	121	6.7461	0.055947	7	5aug17_14jul17_MSM_f1_sp1_26_rev_7	1	0			1	50					14jul17_MSM_f1	MSM female	MSM	female	Mol	M.musculus					0.413223140495868				71	0
2jul17_20dec16_LEW_m3_sp1_15_rev	75	5.8221	0.078085	12	2jul17_20dec16_LEW_m3_sp1_15_rev_12	1	0			1	31					20dec16_LEW_m3	LEW male	LEW	male	Dom	M.musculus					0.413333333333333				44	0
5aug17_14jul17_MSM_f1_sp1_15_rev	75	6.5873	0.088171	14	5aug17_14jul17_MSM_f1_sp1_15_rev_14	1	0			1	31					14jul17_MSM_f1	MSM female	MSM	female	Mol	M.musculus					0.413333333333333				44	0
10jun15_18may15_WSB_m1_sp1_16.2_rev	75	2.6471	0.03513	8	10jun15_18may15_WSB_m1_sp1_16.2_rev_8	1	0			1	31					18may15_WSB_m1	WSB male	WSB	male	Dom	M.musculus					0.413333333333333				44	0
8feb18_1feb18_KAZ_f1_sp1_17_rev	145	1.4085	0.0097366	2	8feb18_1feb18_KAZ_f1_sp1_17_rev_2	1	0			1	60					1feb18_KAZ_f1	KAZ female	KAZ	female	Musc	M.musculus					0.413793103448276				85	0
8feb18_1feb18_KAZ_f1_sp1_28_rev	116	2.5806	0.022287	6	8feb18_1feb18_KAZ_f1_sp1_28_rev_6	1	0			1	48					1feb18_KAZ_f1	KAZ female	KAZ	female	Musc	M.musculus					0.413793103448276				68	0
26jan18_11jan18_KAZ_m3_sp1_21_rev	58	5.1949	0.089083	8	26jan18_11jan18_KAZ_m3_sp1_21_rev_8	1	0			1	24					11jan18_KAZ_m3	KAZ male	KAZ	male	Musc	M.musculus					0.413793103448276				34	0
8feb18_1feb18_KAZ_f1_sp1_6_rev	70	2.4615	0.034964	6	8feb18_1feb18_KAZ_f1_sp1_6_rev_6	1	0			1	29					1feb18_KAZ_f1	KAZ female	KAZ	female	Musc	M.musculus					0.414285714285714				41	0
27jul19_26oct18_SKIVE_f2_sp1_38_rev	123	8.16	0.066483	3	27jul19_26oct18_SKIVE_f2_sp1_38_rev_3	1	0			1	51				2 other faint foci	26oct18_SKIVE_f2	SKIVE female	SKIVE	female	Musc	M.musculus					0.4146341463414634				72	0
26jan18_11jan18_KAZ_m3_sp1_16_rev	94	5.1415	0.054924	17	26jan18_11jan18_KAZ_m3_sp1_16_rev_17	1	0			1	39					11jan18_KAZ_m3	KAZ male	KAZ	male	Musc	M.musculus					0.414893617021277				55	0
2jul17_20dec16_LEW_m3_sp1_7_rev	53	2.9412	0.055605	12	2jul17_20dec16_LEW_m3_sp1_7_rev_12	1	0			1	22					20dec16_LEW_m3	LEW male	LEW	male	Dom	M.musculus					0.415094339622642				31	0
16feb16_17mar16_G_f4_sp1_9_rev	118	8.8768	0.075366	6	16feb16_17mar16_G_f4_sp1_9_rev_6	1	0			1	49					17mar16_G_f4	G female	G	female	Dom	M.musculus					0.415254237288136				69	0
5aug17_14jul17_MSM_f1_sp1_26_rev	118	4.102	0.034904	4	5aug17_14jul17_MSM_f1_sp1_26_rev_4	1	0			1	49					14jul17_MSM_f1	MSM female	MSM	female	Mol	M.musculus					0.415254237288136				69	0
9aug15_17apr15_PWD_f2_sp1_26_rev	77	7.6214	0.099546	2	9aug15_17apr15_PWD_f2_sp1_26_rev_2	1	0			1	32					17apr15_PWD_f2	PWD female	PWD	female	Musc	M.musculus					0.415584415584416				45	0
18jul19_31may19_SKIVE_m2_sp1_24_rev	89	3.5111	0.03941	8	18jul19_31may19_SKIVE_m2_sp1_24_rev_8	1	0			1	37					31may19_SKIVE_m2	SKIVE male	SKIVE	male	Musc	M.musculus					0.415730337078652				52	1
16feb16_17mar16_G_f4_sp1_5_rev	113	8.8056	0.077746	9	16feb16_17mar16_G_f4_sp1_5_rev_9	1	0			1	47					17mar16_G_f4	G female	G	female	Dom	M.musculus					0.415929203539823				66	0
12sep19_31may19_SKIVE_m1_sp1_2_rev	125	5.661	0.045252	4	12sep19_31may19_SKIVE_m1_sp1_2_rev_4	1	0			1	52					31may19_SKIVE_m1	SKIVE male	SKIVE	male	Musc	M.musculus					0.416				73	1
16nov16_17mar16_G_f5_sp1_9_rev	96	5.882	0.060973	4	16nov16_17mar16_G_f5_sp1_9_rev_4	1	0			1	40					17mar16_G_f5	G female	G	female	Dom	M.musculus					0.416666666666667				56	0
5jun18_21may18_KAZ_m2_sp1_18_rev	96	3.0986	0.032362	13	5jun18_21may18_KAZ_m2_sp1_18_rev_13	1	0			1	40					21may18_KAZ_m2	KAZ male	KAZ	male	Musc	M.musculus					0.416666666666667				56	0
5aug17_14jul17_MSM_f1_sp1_12_rev	120	7.9777	0.066753	23	5aug17_14jul17_MSM_f1_sp1_12_rev_23	1	0			1	50					14jul17_MSM_f1	MSM female	MSM	female	Mol	M.musculus					0.416666666666667				70	0
9aug15_17apr15_PWD_f2_sp1_9_rev	108	6.2925	0.05853	6	9aug15_17apr15_PWD_f2_sp1_9_rev_6	1	0			1	45					17apr15_PWD_f2	PWD female	PWD	female	Musc	M.musculus					0.416666666666667				63	0
11dec17_18nov17_WSB_f1_sp1_3_rev	108	3.2353	0.029834	18	11dec17_18nov17_WSB_f1_sp1_3_rev_18	1	0			1	45					18nov17_WSB_f1	WSB female	WSB	female	Dom	M.musculus					0.416666666666667				63	0
9aug15_23apr15_PWD_f2_sp1_6_rev	91	9.6623	0.10638	11	9aug15_23apr15_PWD_f2_sp1_6_rev_11	1	0			1	38					23apr15_PWD_f2	PWD female	PWD	female	Musc	M.musculus					0.417582417582418				53	0
11jan19_27oct18_SKIVE_m1_sp1_1.1_rev	91	8.4893	0.093446	9	11jan19_27oct18_SKIVE_m1_sp1_1.1_rev_9	1	0			1	38					27oct18_SKIVE_m1	SKIVE male	SKIVE	male	Musc	M.musculus					0.417582417582418				53	1
27mar16_6mar16_G_m3_sp1_8_rev	79	4.2807	0.053903	9	27mar16_6mar16_G_m3_sp1_8_rev_9	1	0			1	33					6mar16_G_m3	G male	G	male	Dom	M.musculus					0.417721518987342				46	0
7mar15_1mar15_PWD_m1_sp4_19_rev	79	4.5708	0.057927	1	7mar15_1mar15_PWD_m1_sp4_19_rev_1	1	0			1	33					1mar15_PWD_m1	PWD male	PWD	male	Musc	M.musculus					0.417721518987342				46	1
5jun18_21may18_KAZ_m2_sp1_12_rev	43	3.6847	0.08575	12	5jun18_21may18_KAZ_m2_sp1_12_rev_12	1	0			1	18					21may18_KAZ_m2	KAZ male	KAZ	male	Musc	M.musculus					0.418604651162791				25	0
7feb18_11jan18_KAZ_m4_sp1_26.1_rev	86	4.6034	0.053252	12	7feb18_11jan18_KAZ_m4_sp1_26.1_rev_12	1	0			1	36					11jan18_KAZ_m4	KAZ male	KAZ	male	Musc	M.musculus					0.418604651162791				50	0
29nov17_16nov17_MSM_f1_sp1_15.1_rev	86	7.1642	0.083713	17	29nov17_16nov17_MSM_f1_sp1_15.1_rev_17	1	0			1	36					16nov17_MSM_f1	MSM female	MSM	female	Mol	M.musculus					0.418604651162791				50	0
27jul19_26oct18_SKIVE_f2_sp1_3.2_rev	74	5.4333	0.073922	17	27jul19_26oct18_SKIVE_f2_sp1_3.2_rev_17	1	0			1	31					26oct18_SKIVE_f2	SKIVE female	SKIVE	female	Musc	M.musculus					0.4189189189189189				43	0
17nov16_17mar16_G_f1_sp1_15_rev	105	6.6081	0.062825	2	17nov16_17mar16_G_f1_sp1_15_rev_2	1	0			1	44					17mar16_G_f1	G female	G	female	Dom	M.musculus					0.419047619047619				61	0
13sep18_28jun18_MOLF_m1_sp1_18.1_rev	105	3.3803	0.032137	5	13sep18_28jun18_MOLF_m1_sp1_18.1_rev_5	1	0			1	44					28jun18_MOLF_m1	MOLF male	MOLF	male	Mol	M.musculus					0.419047619047619				61	0
26jan18_11jan18_KAZ_m3_sp1_6_rev	93	3.4375	0.03713	5	26jan18_11jan18_KAZ_m3_sp1_6_rev_5	1	0			1	39					11jan18_KAZ_m3	KAZ male	KAZ	male	Musc	M.musculus					0.419354838709677				54	0
6jun18_13jan17_LEW_f2_sp1_16_rev	62	4.916	0.079731	20	6jun18_13jan17_LEW_f2_sp1_16_rev_20	1	0			1	26					13jan17_LEW_f2	LEW female	LEW	female	Dom	M.musculus					0.419354838709677				36	0
6mar18_1feb18_LEW_m1_sp1_1_rev	93	4.9401	0.053018	13	6mar18_1feb18_LEW_m1_sp1_1_rev_13	1	0			1	39					1feb18_LEW_m1	LEW male	LEW	male	Dom	M.musculus					0.419354838709677				54	0
27mar16_6mar16_PWD_m1_sp1_5_rev	62	1.7143	0.02761	12	27mar16_6mar16_PWD_m1_sp1_5_rev_12	1	0			1	26					6mar16_PWD_m1	PWD male	PWD	male	Musc	M.musculus					0.419354838709677				36	1
21nov17_16nov17_MSM_f3_sp1_14_rev	112	6.6486	0.05949	8	21nov17_16nov17_MSM_f3_sp1_14_rev_8	1	0			1	47					16nov17_MSM_f3	MSM female	MSM	female	Mol	M.musculus					0.419642857142857				65	0
29nov17_16nov17_MSM_f1_sp1_19_rev	112	3.3996	0.030238	2	29nov17_16nov17_MSM_f1_sp1_19_rev_2	1	0			1	47					16nov17_MSM_f1	MSM female	MSM	female	Mol	M.musculus					0.419642857142857				65	0
26dec17_18nov17_WSB_f4_sp1_12_rev	119	3.9428	0.033048	5	26dec17_18nov17_WSB_f4_sp1_12_rev_5	1	0			1	50					18nov17_WSB_f4	WSB female	WSB	female	Dom	M.musculus					0.420168067226891				69	0
10jan18_13jan17_LEW_f1_sp1_13_rev	69	6.6366	0.096178	1	10jan18_13jan17_LEW_f1_sp1_13_rev_1	1	0			1	29					13jan17_LEW_f1	LEW female	LEW	female	Dom	M.musculus					0.420289855072464				40	0
16nov16_17mar16_G_f5_sp1_8_rev	88	4.6258	0.052577	9	16nov16_17mar16_G_f5_sp1_8_rev_9	1	0			1	37					17mar16_G_f5	G female	G	female	Dom	M.musculus					0.420454545454545				51	0
19jan17_4jan17_LEW_f7_sp1_28_rev	88	2.5352	0.028815	14	19jan17_4jan17_LEW_f7_sp1_28_rev_14	1	0			1	37					4jan17_LEW_f7	LEW female	LEW	female	Dom	M.musculus					0.420454545454545				51	0
5aug17_14jul17_MSM_f1_sp1_10_rev	88	4.7897	0.054611	17	5aug17_14jul17_MSM_f1_sp1_10_rev_17	1	0			1	37					14jul17_MSM_f1	MSM female	MSM	female	Mol	M.musculus					0.420454545454545				51	0
30jun17_4jan17_LEW_f3_sp1_10_rev	145	3.6686	0.025338	14	30jun17_4jan17_LEW_f3_sp1_10_rev_14	1	0			1	61					4jan17_LEW_f3	LEW female	LEW	female	Dom	M.musculus					0.420689655172414				84	0
17feb15_13oct14_G_f2_sp1_3_rev	76	8.0794	0.10649	5	17feb15_13oct14_G_f2_sp1_3_rev_5	1	0			1	32					13oct14_G_f2	G female	G	female	Dom	M.musculus					0.421052631578947				44	0
2jul17_20dec16_LEW_m2_sp1_13_rev	57	3.7463	0.065964	10	2jul17_20dec16_LEW_m2_sp1_13_rev_10	1	0			1	24					20dec16_LEW_m2	LEW male	LEW	male	Dom	M.musculus					0.421052631578947				33	0
12dec17_18nov17_WSB_f2_sp1_21_rev	57	3.4921	0.061312	6	12dec17_18nov17_WSB_f2_sp1_21_rev_6	1	0			1	24					18nov17_WSB_f2	WSB female	WSB	female	Dom	M.musculus					0.421052631578947				33	0
27aug15_12jun15_WSB_m2_sp1_13.1_rev	38	7.1999	0.18953	20	27aug15_12jun15_WSB_m2_sp1_13.1_rev_20	1	0			1	16					12jun15_WSB_m2	WSB male	WSB	male	Dom	M.musculus					0.421052631578947				22	0
12may15_30sep14_G_m5_sp1_10_rev	83	1.8462	0.022261	5	12may15_30sep14_G_m5_sp1_10_rev_5	1	0			1	35					30sep14_G_m5	G male	G	male	Dom	M.musculus					0.421686746987952				48	0
7mar15_1mar15_PWD_m1_sp4_17_rev	64	4.9161	0.076733	10	7mar15_1mar15_PWD_m1_sp4_17_rev_10	1	0			1	27					1mar15_PWD_m1	PWD male	PWD	male	Musc	M.musculus					0.421875				37	1
20aug15_22jun15_G_m1_sp2_20_rev	90	3.125	0.034774	11	20aug15_22jun15_G_m1_sp2_20_rev_11	1	0			1	38					22jun15_G_m1	G male	G	male	Dom	M.musculus					0.422222222222222				52	0
12jul15_12jun15_WSB_m1_sp1_1_rev	90	7.9005	0.087462	1	12jul15_12jun15_WSB_m1_sp1_1_rev_1	1	0			1	38					12jun15_WSB_m1	WSB male	WSB	male	Dom	M.musculus					0.422222222222222				52	0
7feb18_11jan18_KAZ_m4_sp1_23_rev	71	3.7421	0.052973	4	7feb18_11jan18_KAZ_m4_sp1_23_rev_4	1	0			1	30					11jan18_KAZ_m4	KAZ male	KAZ	male	Musc	M.musculus					0.422535211267606				41	0
6jun18_13jan17_LEW_f2_sp1_11_rev	71	8.4143	0.11802	11	6jun18_13jan17_LEW_f2_sp1_11_rev_11	1	0			1	30					13jan17_LEW_f2	LEW female	LEW	female	Dom	M.musculus					0.422535211267606				41	0
11dec17_18nov17_WSB_f1_sp1_23_rev	142	8.0735	0.056841	5	11dec17_18nov17_WSB_f1_sp1_23_rev_5	1	0			1	60					18nov17_WSB_f1	WSB female	WSB	female	Dom	M.musculus					0.422535211267606				82	0
13sep18_28jun18_MOLF_m1_sp1_26_rev	97	2.9412	0.03035	6	13sep18_28jun18_MOLF_m1_sp1_26_rev_6	1	0			1	41					28jun18_MOLF_m1	MOLF male	MOLF	male	Mol	M.musculus					0.422680412371134				56	0
8jun15_23apr15_PWD_f2_sp1_20_rev	97	2.8923	0.029739	17	8jun15_23apr15_PWD_f2_sp1_20_rev_17	1	0			1	41					23apr15_PWD_f2	PWD female	PWD	female	Musc	M.musculus					0.422680412371134				56	0
15mar16_16jan16_G_f1_sp1_8_rev	130	2.4767	0.019002	3	15mar16_16jan16_G_f1_sp1_8_rev_3	1	0			1	55					16jan16_G_f1	G female	G	female	Dom	M.musculus					0.423076923076923				75	0
8feb17_4jan17_LEW_f1_sp1_5_rev	111	3.9394	0.035559	2	8feb17_4jan17_LEW_f1_sp1_5_rev_2	1	0			1	47					4jan17_LEW_f1	LEW female	LEW	female	Dom	M.musculus					0.423423423423423				64	0
12feb15_13oct14_G_f2_sp1_3_rev	118	1.8919	0.016063	8	12feb15_13oct14_G_f2_sp1_3_rev_8	1	0			1	50					13oct14_G_f2	G female	G	female	Dom	M.musculus					0.423728813559322				68	0
27mar16_6mar16_G_m1_sp1_2_rev	59	4.4793	0.075692	12	27mar16_6mar16_G_m1_sp1_2_rev_12	1	0			1	25					6mar16_G_m1	G male	G	male	Dom	M.musculus					0.423728813559322				34	0
10jan18_13jan17_LEW_f1_sp1_16_rev	66	4.3613	0.066126	10	10jan18_13jan17_LEW_f1_sp1_16_rev_10	1	0			1	28					13jan17_LEW_f1	LEW female	LEW	female	Dom	M.musculus					0.424242424242424				38	0
2apr15_28feb15_PWD_f3_sp1_3_rev	66	5.2267	0.079266	1	2apr15_28feb15_PWD_f3_sp1_3_rev_1	1	0			1	28					28feb15_PWD_f3	PWD female	PWD	female	Musc	M.musculus					0.424242424242424				38	0
12dec17_18nov17_WSB_f2_sp1_22_rev	66	1.6667	0.025314	8	12dec17_18nov17_WSB_f2_sp1_22_rev_8	1	0			1	28					18nov17_WSB_f2	WSB female	WSB	female	Dom	M.musculus					0.424242424242424				38	0
27jul19_26oct18_SKIVE_f2_sp1_13_rev	66	5.8769	0.089285	7	27jul19_26oct18_SKIVE_f2_sp1_13_rev_7	1	0			1	28					26oct18_SKIVE_f2	SKIVE female	SKIVE	female	Musc	M.musculus					0.42424242424242425				38	0
19jan17_4jan17_LEW_f7_sp1_9_rev	106	2.9412	0.02766	18	19jan17_4jan17_LEW_f7_sp1_9_rev_18	1	0			1	45					4jan17_LEW_f7	LEW female	LEW	female	Dom	M.musculus					0.424528301886792				61	0
23jul19_28sep18_CZECH_m2_sp1_12_rev	73	8.5487	0.11724	19	23jul19_28sep18_CZECH_m2_sp1_12_rev_19	1	0			1	31					28sep18_CZECH_m2	CZECH male	CZECH	male	Musc	M.musculus					0.424657534246575				42	0
2jul17_20dec16_LEW_m2_sp1_4_rev	73	5.4007	0.073765	2	2jul17_20dec16_LEW_m2_sp1_4_rev_2	1	0			1	31					20dec16_LEW_m2	LEW male	LEW	male	Dom	M.musculus					0.424657534246575				42	0
4jun19_28sep18_MOLF_m1_sp1_29.1_rev	73	6.7177	0.092565	2	4jun19_28sep18_MOLF_m1_sp1_29.1_rev_2	1	0			1	31					28sep18_MOLF_m1	MOLF male	MOLF	male	Mol	M.musculus					0.424657534246575				42	0
5aug17_14jul17_MSM_f1_sp1_10_rev	120	5.7424	0.047884	4	5aug17_14jul17_MSM_f1_sp1_10_rev_4	1	0			1	51					14jul17_MSM_f1	MSM female	MSM	female	Mol	M.musculus					0.425				69	0
4dec17_16nov17_MSM_f2_sp1_5_rev	87	6.2775	0.071907	7	4dec17_16nov17_MSM_f2_sp1_5_rev_7	1	0			1	37					16nov17_MSM_f2	MSM female	MSM	female	Mol	M.musculus					0.425287356321839				50	0
12dec17_18nov17_WSB_f2_sp1_8_rev	134	3.4921	0.02608	11	12dec17_18nov17_WSB_f2_sp1_8_rev_11	1	0			1	57					18nov17_WSB_f2	WSB female	WSB	female	Dom	M.musculus					0.425373134328358				77	0
8apr15_1apr15_PWD_f1_sp1_1_rev	129	3.5601	0.027543	2	8apr15_1apr15_PWD_f1_sp1_1_rev_2	1	0			1	55					1apr15_PWD_f1	PWD female	PWD	female	Musc	M.musculus					0.426356589147287				74	0
12jul15_12jun15_WSB_m1_sp1_6.3_rev	89	2.5	0.028195	5	12jul15_12jun15_WSB_m1_sp1_6.3_rev_5	1	0			1	38					12jun15_WSB_m1	WSB male	WSB	male	Dom	M.musculus					0.426966292134831				51	0
8feb18_1feb18_KAZ_f1_sp1_8_rev	96	2.3881	0.024781	3	8feb18_1feb18_KAZ_f1_sp1_8_rev_3	1	0			1	41					1feb18_KAZ_f1	KAZ female	KAZ	female	Musc	M.musculus					0.427083333333333				55	0
5jun18_21may18_KAZ_m2_sp1_11_rev	96	2.4242	0.025244	15	5jun18_21may18_KAZ_m2_sp1_11_rev_15	1	0			1	41					21may18_KAZ_m2	KAZ male	KAZ	male	Musc	M.musculus					0.427083333333333				55	0
6jun18_13jan17_LEW_f2_sp1_16_rev	110	6.9647	0.063146	14	6jun18_13jan17_LEW_f2_sp1_16_rev_14	1	0			1	47					13jan17_LEW_f2	LEW female	LEW	female	Dom	M.musculus					0.427272727272727				63	0
13sep18_28jun18_MOLF_m1_sp1_21.1_rev	110	3.5294	0.032056	8	13sep18_28jun18_MOLF_m1_sp1_21.1_rev_8	1	0			1	47				faint foci near end	28jun18_MOLF_m1	MOLF male	MOLF	male	Mol	M.musculus					0.427272727272727				63	0
16feb18_1feb18_KAZ_f4_sp1_25_rev	117	3.9596	0.033883	20	16feb18_1feb18_KAZ_f4_sp1_25_rev_20	1	0			1	50					1feb18_KAZ_f4	KAZ female	KAZ	female	Musc	M.musculus					0.427350427350427				67	0
13mar15_28feb15_PWD_f2_sp1_38_rev	117	5.7749	0.049159	3	13mar15_28feb15_PWD_f2_sp1_38_rev_3	1	0			1	50					28feb15_PWD_f2	PWD female	PWD	female	Musc	M.musculus					0.427350427350427				67	0
14dec17_18nov17_WSB_f3_sp1_21_rev	145	0.89552	0.0061938	2	14dec17_18nov17_WSB_f3_sp1_21_rev_2	1	0			1	62					18nov17_WSB_f3	WSB female	WSB	female	Dom	M.musculus					0.427586206896552				83	0
15mar16_16jan16_G_f1_sp1_5_rev	77	5.2031	0.06774	7	15mar16_16jan16_G_f1_sp1_5_rev_7	1	0			1	33					16jan16_G_f1	G female	G	female	Dom	M.musculus					0.428571428571429				44	0
1mar18_1feb18_KAZ_f3_sp1_14_rev	77	1.4925	0.019432	11	1mar18_1feb18_KAZ_f3_sp1_14_rev_11	1	0			1	33					1feb18_KAZ_f3	KAZ female	KAZ	female	Musc	M.musculus					0.428571428571429				44	0
1mar18_1feb18_KAZ_f3_sp1_2_rev	119	3.9635	0.033416	12	1mar18_1feb18_KAZ_f3_sp1_2_rev_12	1	0			1	51					1feb18_KAZ_f3	KAZ female	KAZ	female	Musc	M.musculus					0.428571428571429				68	0
20apr18_11jan18_KAZ_f1_sp1_1_rev	112	5.2278	0.046562	11	20apr18_11jan18_KAZ_f1_sp1_1_rev_11	1	0			1	48					11jan18_KAZ_f1	KAZ female	KAZ	female	Musc	M.musculus					0.428571428571429				64	0
5jun18_21may18_KAZ_m2_sp1_1_rev	91	3.8806	0.042808	14	5jun18_21may18_KAZ_m2_sp1_1_rev_14	1	0			1	39					21may18_KAZ_m2	KAZ male	KAZ	male	Musc	M.musculus					0.428571428571429				52	0
7feb18_11jan18_KAZ_m4_sp1_25_rev	105	9.187	0.087266	17	7feb18_11jan18_KAZ_m4_sp1_25_rev_17	1	0			1	45					11jan18_KAZ_m4	KAZ male	KAZ	male	Musc	M.musculus					0.428571428571429				60	0
2jul17_20dec16_LEW_m2_sp1_14_rev	42	4.5729	0.10959	20	2jul17_20dec16_LEW_m2_sp1_14_rev_20	1	0			1	18					20dec16_LEW_m2	LEW male	LEW	male	Dom	M.musculus					0.428571428571429				24	0
2jul17_20dec16_LEW_m3_sp1_17_rev	49	7.4275	0.15219	16	2jul17_20dec16_LEW_m3_sp1_17_rev_16	1	0			1	21					20dec16_LEW_m3	LEW male	LEW	male	Dom	M.musculus					0.428571428571429				28	0
3mar15_13jan17_LEW_m1_sp1_12_rev	56	1.8182	0.032611	17	3mar15_13jan17_LEW_m1_sp1_12_rev_17	1	0			1	24					13jan17_LEW_m1	LEW male	LEW	male	Dom	M.musculus					0.428571428571429				32	0
6mar18_1feb18_LEW_m1_sp1_1_rev	49	3.6923	0.07574	8	6mar18_1feb18_LEW_m1_sp1_1_rev_8	1	0			1	21					1feb18_LEW_m1	LEW male	LEW	male	Dom	M.musculus					0.428571428571429				28	0
11dec17_18nov17_WSB_f1_sp1_14_rev	91	6.3579	0.069638	17	11dec17_18nov17_WSB_f1_sp1_14_rev_17	1	0			1	39					18nov17_WSB_f1	WSB female	WSB	female	Dom	M.musculus					0.428571428571429				52	0
12dec17_18nov17_WSB_f2_sp1_16_rev	56	0.29412	0.0052096	5	12dec17_18nov17_WSB_f2_sp1_16_rev_5	1	0			1	24					18nov17_WSB_f2	WSB female	WSB	female	Dom	M.musculus					0.428571428571429				32	0
26dec17_18nov17_WSB_f4_sp1_17_rev	70	2.9032	0.041518	1	26dec17_18nov17_WSB_f4_sp1_17_rev_1	1	0			1	30					18nov17_WSB_f4	WSB female	WSB	female	Dom	M.musculus					0.428571428571429				40	0
9aug15_23apr15_PWD_f2_sp1_9.1_rev	212	4.7344	0.022311	19	9aug15_23apr15_PWD_f2_sp1_9.1_rev_19	1	0			1	91					23apr15_PWD_f2	PWD female	PWD	female	Musc	M.musculus					0.429245283018868				121	0
27mar16_6mar16_G_m3_sp1_8_rev	93	5.1866	0.056069	10	27mar16_6mar16_G_m3_sp1_8_rev_10	1	0			1	40					6mar16_G_m3	G male	G	male	Dom	M.musculus					0.43010752688172				53	0
12dec17_18nov17_WSB_f2_sp1_9_rev	86	2.8571	0.033249	18	12dec17_18nov17_WSB_f2_sp1_9_rev_18	1	0			1	37					18nov17_WSB_f2	WSB female	WSB	female	Dom	M.musculus					0.430232558139535				49	0
9mar16_22feb16_G_m1_sp1_19_rev	79	5.677	0.072004	3	9mar16_22feb16_G_m1_sp1_19_rev_3	1	0			1	34					22feb16_G_m1	G male	G	male	Dom	M.musculus					0.430379746835443				45	0
11dec17_18nov17_WSB_f1_sp1_9_rev	72	3.881	0.05355	15	11dec17_18nov17_WSB_f1_sp1_9_rev_15	1	0			1	31					18nov17_WSB_f1	WSB female	WSB	female	Dom	M.musculus					0.430555555555556				41	0
3mar15_13jan17_LEW_m1_sp1_27_rev	58	5.3739	0.093439	10	3mar15_13jan17_LEW_m1_sp1_27_rev_10	1	0			1	25					13jan17_LEW_m1	LEW male	LEW	male	Dom	M.musculus					0.431034482758621				33	0
5aug17_14jul17_MSM_f1_sp1_9_rev	116	5.6113	0.048259	11	5aug17_14jul17_MSM_f1_sp1_9_rev_11	1	0			1	50					14jul17_MSM_f1	MSM female	MSM	female	Mol	M.musculus					0.431034482758621				66	0
6mar18_1feb18_LEW_m1_sp1_1_rev	51	5.5809	0.10993	17	6mar18_1feb18_LEW_m1_sp1_1_rev_17	1	0			1	22					1feb18_LEW_m1	LEW male	LEW	male	Dom	M.musculus					0.431372549019608				29	0
11dec17_18nov17_WSB_f1_sp1_21_rev	102	5.4288	0.05347	14	11dec17_18nov17_WSB_f1_sp1_21_rev_14	1	0			1	44					18nov17_WSB_f1	WSB female	WSB	female	Dom	M.musculus					0.431372549019608				58	0
4jun19_28sep18_MOLF_m1_sp1_37_rev	95	5.2488	0.055	4	4jun19_28sep18_MOLF_m1_sp1_37_rev_4	1	0			1	41					28sep18_MOLF_m1	MOLF male	MOLF	male	Mol	M.musculus					0.431578947368421				54	0
11jan19_27oct18_SKIVE_m1_sp1_16.2_rev	95	3.1532	0.033214	11	11jan19_27oct18_SKIVE_m1_sp1_16.2_rev_11	1	0			1	41					27oct18_SKIVE_m1	SKIVE male	SKIVE	male	Musc	M.musculus					0.431578947368421				54	1
27jul19_26oct18_SKIVE_f1_sp1_22_rev	88	4.2462	0.048435	14	27jul19_26oct18_SKIVE_f1_sp1_22_rev_14	1	0			1	38					26oct18_SKIVE_f1	SKIVE female	SKIVE	female	Musc	M.musculus					0.4318181818181818				50	0
18jul19_1mar19_MOLF_m1_sp1_30.1_rev	88	5.0793	0.057893	5	18jul19_1mar19_MOLF_m1_sp1_30.1_rev_5	1	0			1	38					1mar19_MOLF_m1	MOLF male	MOLF	male	Mol	M.musculus					0.431818181818182				50	0
1mar18_1feb18_KAZ_f3_sp1_11_rev	111	5.174	0.04667	15	1mar18_1feb18_KAZ_f3_sp1_11_rev_15	1	0			1	48					1feb18_KAZ_f3	KAZ female	KAZ	female	Musc	M.musculus					0.432432432432432				63	0
19jan17_4jan17_LEW_f7_sp1_9_rev	104	8.3011	0.079663	21	19jan17_4jan17_LEW_f7_sp1_9_rev_21	1	0			1	45					4jan17_LEW_f7	LEW female	LEW	female	Dom	M.musculus					0.432692307692308				59	0
27mar16_6mar16_PWD_m1_sp1_2.2_rev	127	7.6107	0.060007	2	27mar16_6mar16_PWD_m1_sp1_2.2_rev_2	1	0			1	55					6mar16_PWD_m1	PWD male	PWD	male	Musc	M.musculus					0.433070866141732				72	1
7feb18_11jan18_KAZ_m4_sp1_26.1_rev	90	6.0983	0.068101	7	7feb18_11jan18_KAZ_m4_sp1_26.1_rev_7	1	0			1	39					11jan18_KAZ_m4	KAZ male	KAZ	male	Musc	M.musculus					0.433333333333333				51	0
12dec17_18nov17_WSB_f2_sp1_19_rev	120	13.184	0.11025	12	12dec17_18nov17_WSB_f2_sp1_19_rev_12	1	0			1	52					18nov17_WSB_f2	WSB female	WSB	female	Dom	M.musculus					0.433333333333333				68	0
15mar17_13jan17_LEW_f3_sp1_13_rev	53	4.9309	0.092998	19	15mar17_13jan17_LEW_f3_sp1_13_rev_19	1	0			1	23					13jan17_LEW_f3	LEW female	LEW	female	Dom	M.musculus					0.433962264150943				30	0
19jan17_4jan17_LEW_f6_sp1_45_rev	53	3.6247	0.067846	3	19jan17_4jan17_LEW_f6_sp1_45_rev_3	1	0			1	23					4jan17_LEW_f6	LEW female	LEW	female	Dom	M.musculus					0.433962264150943				30	0
27jul19_26oct18_SKIVE_f1_sp1_22_rev	106	4.2497	0.040228	21	27jul19_26oct18_SKIVE_f1_sp1_22_rev_21	1	0			1	46					26oct18_SKIVE_f1	SKIVE female	SKIVE	female	Musc	M.musculus					0.4339622641509434				60	0
19oct15_12oct15_G_m1_sp1_9_rev	76	7.4931	0.098549	18	19oct15_12oct15_G_m1_sp1_9_rev_18	1	0			1	33					12oct15_G_m1	G male	G	male	Dom	M.musculus					0.434210526315789				43	0
27jul19_26oct18_SKIVE_f2_sp1_3.1_rev	76	3.8857	0.050985	5	27jul19_26oct18_SKIVE_f2_sp1_3.1_rev_5	1	0			1	33					26oct18_SKIVE_f2	SKIVE female	SKIVE	female	Musc	M.musculus					0.4342105263157895				43	0
16nov16_17mar16_G_f5_sp1_8_rev	122	3.8124	0.03115	13	16nov16_17mar16_G_f5_sp1_8_rev_13	1	0			1	53					17mar16_G_f5	G female	G	female	Dom	M.musculus					0.434426229508197				69	0
9aug15_17apr15_PWD_f2_sp1_8_rev	122	5.4908	0.044893	3	9aug15_17apr15_PWD_f2_sp1_8_rev_3	1	0			1	53					17apr15_PWD_f2	PWD female	PWD	female	Musc	M.musculus					0.434426229508197				69	0
30jun17_4jan17_LEW_f3_sp1_3_rev	69	6.3195	0.091661	1	30jun17_4jan17_LEW_f3_sp1_3_rev_1	1	0			1	30					4jan17_LEW_f3	LEW female	LEW	female	Dom	M.musculus					0.434782608695652				39	0
21nov17_16nov17_MSM_f3_sp1_4_rev	161	8.1748	0.050928	3	21nov17_16nov17_MSM_f3_sp1_4_rev_3	1	0			1	70	159				16nov17_MSM_f3	MSM female	MSM	female	Mol	M.musculus					0.434782608695652	0.987577639751553			91	0
9aug15_23apr15_PWD_f2_sp1_6_rev	69	8.4755	0.12245	6	9aug15_23apr15_PWD_f2_sp1_6_rev_6	1	0			1	30					23apr15_PWD_f2	PWD female	PWD	female	Musc	M.musculus					0.434782608695652				39	0
13sep18_28jun18_MOLF_m1_sp1_20_rev	85	1.4493	0.017086	12	13sep18_28jun18_MOLF_m1_sp1_20_rev_12	1	0			1	37				2 faint flanking foci	28jun18_MOLF_m1	MOLF male	MOLF	male	Mol	M.musculus					0.435294117647059				48	0
2aug19_28sep18_MOLF_m2_sp1_9_rev	85	4.2429	0.049764	13	2aug19_28sep18_MOLF_m2_sp1_9_rev_13	1	0			1	37					28sep18_MOLF_m2	MOLF male	MOLF	male	Mol	M.musculus					0.435294117647059				48	0
27jul19_26oct18_SKIVE_f1_sp1_24_rev	78	3.7765	0.048409	18	27jul19_26oct18_SKIVE_f1_sp1_24_rev_18	1	0			1	34					26oct18_SKIVE_f1	SKIVE female	SKIVE	female	Musc	M.musculus					0.4358974358974359				44	0
19may15_31mar15_WSB_m1_sp1_4_rev	78	1.875	0.024014	16	19may15_31mar15_WSB_m1_sp1_4_rev_16	1	0			1	34					31mar15_WSB_m1	WSB male	WSB	male	Dom	M.musculus					0.435897435897436				44	0
8feb18_1feb18_KAZ_f1_sp1_17_rev	165	6.7901	0.041274	9	8feb18_1feb18_KAZ_f1_sp1_17_rev_9	1	0			1	72					1feb18_KAZ_f1	KAZ female	KAZ	female	Musc	M.musculus					0.436363636363636				93	0
18sep19_19aug19_SKIVE_m3_sp1_20.1_rev	71	6.2635	0.088497	15	18sep19_19aug19_SKIVE_m3_sp1_20.1_rev_15	1	0			1	31					19aug19_SKIVE_m3	SKIVE male	SKIVE	male	Musc	M.musculus					0.436619718309859				40	1
15mar17_13jan17_LEW_f3_sp1_20_rev	87	2.3881	0.027449	6	15mar17_13jan17_LEW_f3_sp1_20_rev_6	1	0			1	38					13jan17_LEW_f3	LEW female	LEW	female	Dom	M.musculus					0.436781609195402				49	0
9mar16_22feb16_G_m1_sp1_8_rev	103	5.1467	0.049938	6	9mar16_22feb16_G_m1_sp1_8_rev_6	1	0			1	45					22feb16_G_m1	G male	G	male	Dom	M.musculus					0.436893203883495				58	0
16feb16_17mar16_G_f4_sp1_8_rev	112	1.9672	0.017611	8	16feb16_17mar16_G_f4_sp1_8_rev_8	1	0			1	49					17mar16_G_f4	G female	G	female	Dom	M.musculus					0.4375				63	0
20aug15_22jun15_G_m1_sp2_20_rev	80	8.489	0.10659	1	20aug15_22jun15_G_m1_sp2_20_rev_1	1	0			1	35					22jun15_G_m1	G male	G	male	Dom	M.musculus					0.4375				45	0
20apr18_11jan18_KAZ_f1_sp1_9_rev	64	3.2353	0.050292	15	20apr18_11jan18_KAZ_f1_sp1_9_rev_15	1	0			1	28					11jan18_KAZ_f1	KAZ female	KAZ	female	Musc	M.musculus					0.4375				36	0
19jan17_4jan17_LEW_f6_sp1_46_rev	80	5.2792	0.065612	9	19jan17_4jan17_LEW_f6_sp1_46_rev_9	1	0			1	35					4jan17_LEW_f6	LEW female	LEW	female	Dom	M.musculus					0.4375				45	0
9aug15_17apr15_PWD_f2_sp1_9_rev	160	7.0558	0.044074	8	9aug15_17apr15_PWD_f2_sp1_9_rev_8	1	0			1	70					17apr15_PWD_f2	PWD female	PWD	female	Musc	M.musculus					0.4375				90	0
9aug15_17apr15_PWD_f2_sp1_8_rev	153	7.456	0.048874	12	9aug15_17apr15_PWD_f2_sp1_8_rev_12	1	0			1	67					17apr15_PWD_f2	PWD female	PWD	female	Musc	M.musculus					0.437908496732026				86	0
8feb17_20dec16_LEW_m1_sp1_7_rev	73	3.3333	0.045939	11	8feb17_20dec16_LEW_m1_sp1_7_rev_11	1	0			1	32					20dec16_LEW_m1	LEW male	LEW	male	Dom	M.musculus					0.438356164383562				41	0
8jun15_23apr15_PWD_f2_sp1_20_rev	73	9.0798	0.12368	12	8jun15_23apr15_PWD_f2_sp1_20_rev_12	1	0			1	32					23apr15_PWD_f2	PWD female	PWD	female	Musc	M.musculus					0.438356164383562				41	0
11dec17_18nov17_WSB_f1_sp1_5_rev	73	4.7677	0.065229	7	11dec17_18nov17_WSB_f1_sp1_5_rev_7	1	0			1	32					18nov17_WSB_f1	WSB female	WSB	female	Dom	M.musculus					0.438356164383562				41	0
7feb18_11jan18_KAZ_m4_sp1_26.2_rev	114	6.052	0.053173	9	7feb18_11jan18_KAZ_m4_sp1_26.2_rev_9	1	0			1	50					11jan18_KAZ_m4	KAZ male	KAZ	male	Musc	M.musculus					0.43859649122807				64	0
15mar17_13jan17_LEW_f3_sp1_20_rev	114	3.4849	0.030651	4	15mar17_13jan17_LEW_f3_sp1_20_rev_4	1	0			1	50				second foci faint	13jan17_LEW_f3	LEW female	LEW	female	Dom	M.musculus					0.43859649122807				64	0
1mar18_1feb18_KAZ_f3_sp1_3_rev	98	4.2254	0.043106	13	1mar18_1feb18_KAZ_f3_sp1_3_rev_13	1	0			1	43					1feb18_KAZ_f3	KAZ female	KAZ	female	Musc	M.musculus					0.438775510204082				55	0
8feb18_1feb18_KAZ_f1_sp1_6_rev	82	3.8806	0.047504	4	8feb18_1feb18_KAZ_f1_sp1_6_rev_4	1	0			1	36					1feb18_KAZ_f1	KAZ female	KAZ	female	Musc	M.musculus					0.439024390243902				46	0
12dec17_18nov17_WSB_f2_sp1_14_rev	123	3.6708	0.029952	1	12dec17_18nov17_WSB_f2_sp1_14_rev_1	1	0			1	54					18nov17_WSB_f2	WSB female	WSB	female	Dom	M.musculus					0.439024390243902				69	0
8feb18_1feb18_KAZ_f1_sp1_16_rev	107	4.3321	0.040581	1	8feb18_1feb18_KAZ_f1_sp1_16_rev_1	1	0			1	47					1feb18_KAZ_f1	KAZ female	KAZ	female	Musc	M.musculus					0.439252336448598				60	0
19jan17_4jan17_LEW_f7_sp1_6_rev	66	4.4441	0.06771	6	19jan17_4jan17_LEW_f7_sp1_6_rev_6	1	0			1	29					4jan17_LEW_f7	LEW female	LEW	female	Dom	M.musculus					0.439393939393939				37	0
5jun18_21may18_KAZ_m2_sp1_8.3_rev	100	4.484	0.044712	7	5jun18_21may18_KAZ_m2_sp1_8.3_rev_7	1	0			1	44					21may18_KAZ_m2	KAZ male	KAZ	male	Musc	M.musculus					0.44				56	0
26jan18_11jan18_KAZ_m3_sp1_15_rev	50	4.9906	0.09958	1	26jan18_11jan18_KAZ_m3_sp1_15_rev_1	1	0			1	22					11jan18_KAZ_m3	KAZ male	KAZ	male	Musc	M.musculus					0.44				28	0
4jun19_28sep18_MOLF_m1_sp1_31_rev	109	3.2836	0.030147	5	4jun19_28sep18_MOLF_m1_sp1_31_rev_5	1	0			1	48					28sep18_MOLF_m1	MOLF male	MOLF	male	Mol	M.musculus					0.440366972477064				61	0
11dec17_18nov17_WSB_f1_sp1_3_rev	109	1.8462	0.016897	19	11dec17_18nov17_WSB_f1_sp1_3_rev_19	1	0			1	48					18nov17_WSB_f1	WSB female	WSB	female	Dom	M.musculus					0.440366972477064				61	0
2jul17_20dec16_LEW_m3_sp1_22_rev	84	3.1884	0.038055	12	2jul17_20dec16_LEW_m3_sp1_22_rev_12	1	0			1	37					20dec16_LEW_m3	LEW male	LEW	male	Dom	M.musculus					0.44047619047619				47	0
5jul15_23apr15_PWD_f1_sp1_16_rev	118	7.8673	0.066618	20	5jul15_23apr15_PWD_f1_sp1_16_rev_20	1	0			1	52					23apr15_PWD_f1	PWD female	PWD	female	Musc	M.musculus					0.440677966101695				66	0
17nov16_17mar16_G_f1_sp1_12_rev	136	6.2925	0.0462	6	17nov16_17mar16_G_f1_sp1_12_rev_6	1	0			1	60					17mar16_G_f1	G female	G	female	Dom	M.musculus					0.441176470588235				76	0
8jun15_23apr15_PWD_f2_sp1_12_rev	77	4.4602	0.057959	8	8jun15_23apr15_PWD_f2_sp1_12_rev_8	1	0			1	34					23apr15_PWD_f2	PWD female	PWD	female	Musc	M.musculus					0.441558441558442				43	0
16feb18_1feb18_KAZ_f4_sp1_4_rev	163	6.7961	0.041575	13	16feb18_1feb18_KAZ_f4_sp1_4_rev_13	1	0			1	72					1feb18_KAZ_f4	KAZ female	KAZ	female	Musc	M.musculus					0.441717791411043				91	0
22jul19_26oct18_SKIVE_f3_sp1_14.1_rev	129	6.898	0.05356	14	22jul19_26oct18_SKIVE_f3_sp1_14.1_rev_14	1	0			1	57					26oct18_SKIVE_f3	SKIVE female	SKIVE	female	Musc	M.musculus					0.4418604651162791				72	0
19jan17_4jan17_LEW_f6_sp1_39_rev	95	3.0986	0.032661	11	19jan17_4jan17_LEW_f6_sp1_39_rev_11	1	0			1	42					4jan17_LEW_f6	LEW female	LEW	female	Dom	M.musculus					0.442105263157895				53	0
11dec17_18nov17_WSB_f1_sp1_14_rev	95	2.6667	0.027923	5	11dec17_18nov17_WSB_f1_sp1_14_rev_5	1	0			1	42				1 faint foci	18nov17_WSB_f1	WSB female	WSB	female	Dom	M.musculus					0.442105263157895				53	0
1mar18_1feb18_KAZ_f3_sp1_3_rev	113	5.0332	0.044646	2	1mar18_1feb18_KAZ_f3_sp1_3_rev_2	1	0			1	50					1feb18_KAZ_f3	KAZ female	KAZ	female	Musc	M.musculus					0.442477876106195				63	0
19jan17_4jan17_LEW_f7_sp1_4_rev	122	3.4246	0.028087	20	19jan17_4jan17_LEW_f7_sp1_4_rev_20	1	0			1	54					4jan17_LEW_f7	LEW female	LEW	female	Dom	M.musculus					0.442622950819672				68	0
12dec17_18nov17_WSB_f2_sp1_4_rev	122	5.493	0.045016	3	12dec17_18nov17_WSB_f2_sp1_4_rev_3	1	0			1	54					18nov17_WSB_f2	WSB female	WSB	female	Dom	M.musculus					0.442622950819672				68	0
27jul19_26oct18_SKIVE_f2_sp1_3.1_rev	61	2.7027	0.044388	6	27jul19_26oct18_SKIVE_f2_sp1_3.1_rev_6	1	0			1	27					26oct18_SKIVE_f2	SKIVE female	SKIVE	female	Musc	M.musculus					0.4426229508196721				34	0
10jun19_31may19_SKIVE_f6_sp1_60_rev	70	3.5655	0.051077	4	10jun19_31may19_SKIVE_f6_sp1_60_rev_4	1	0			1	31					31may19_SKIVE_f6	SKIVE female	SKIVE	female	Musc	M.musculus					0.442857142857143				39	0
26dec17_18nov17_WSB_f4_sp1_4_rev	70	4.3077	0.061628	11	26dec17_18nov17_WSB_f4_sp1_4_rev_11	1	0			1	31					18nov17_WSB_f4	WSB female	WSB	female	Dom	M.musculus					0.442857142857143				39	0
2jul17_20dec16_LEW_m3_sp1_15_rev	79	4.6989	0.059138	11	2jul17_20dec16_LEW_m3_sp1_15_rev_11	1	0			1	35					20dec16_LEW_m3	LEW male	LEW	male	Dom	M.musculus					0.443037974683544				44	0
14dec17_18nov17_WSB_f3_sp1_18_rev	88	6.3883	0.072346	16	14dec17_18nov17_WSB_f3_sp1_18_rev_16	1	0			1	39					18nov17_WSB_f3	WSB female	WSB	female	Dom	M.musculus					0.443181818181818				49	0
16feb16_17mar16_G_f4_sp1_7_rev	72	6.1154	0.084607	8	16feb16_17mar16_G_f4_sp1_7_rev_8	1	0			1	32					17mar16_G_f4	G female	G	female	Dom	M.musculus					0.444444444444444				40	0
27mar16_6mar16_G_m3_sp1_16_rev	63	2.7273	0.043032	5	27mar16_6mar16_G_m3_sp1_16_rev_5	1	0			1	28					6mar16_G_m3	G male	G	male	Dom	M.musculus					0.444444444444444				35	0
6mar18_1feb18_LEW_m1_sp1_7_rev	54	2.6087	0.048475	8	6mar18_1feb18_LEW_m1_sp1_7_rev_8	1	0			1	24					1feb18_LEW_m1	LEW male	LEW	male	Dom	M.musculus					0.444444444444444				30	0
13sep18_28jun18_MOLF_m1_sp1_26_rev	81	5.1079	0.062861	16	13sep18_28jun18_MOLF_m1_sp1_26_rev_16	1	0			1	36					28jun18_MOLF_m1	MOLF male	MOLF	male	Mol	M.musculus					0.444444444444444				45	0
20jul15_18may15_PWD_m2_sp1_14.2_rev	63	5.533	0.087232	6	20jul15_18may15_PWD_m2_sp1_14.2_rev_6	1	0			1	28					18may15_PWD_m2	PWD male	PWD	male	Musc	M.musculus					0.444444444444444				35	1
12dec17_18nov17_WSB_f2_sp1_14_rev	101	1.9355	0.019197	18	12dec17_18nov17_WSB_f2_sp1_14_rev_18	1	0			1	45					18nov17_WSB_f2	WSB female	WSB	female	Dom	M.musculus					0.445544554455446				56	0
13sep18_28jun18_MOLF_m1_sp1_18.2_rev	92	4.9602	0.054128	12	13sep18_28jun18_MOLF_m1_sp1_18.2_rev_12	1	0			1	41					28jun18_MOLF_m1	MOLF male	MOLF	male	Mol	M.musculus					0.445652173913043				51	0
6jan18_13jan17_LEW_f1_sp1_2_rev	65	3.1429	0.048054	1	6jan18_13jan17_LEW_f1_sp1_2_rev_1	1	0			1	29					13jan17_LEW_f1	LEW female	LEW	female	Dom	M.musculus					0.446153846153846				36	0
12dec17_18nov17_WSB_f2_sp1_21_rev	130	11.2709	0.086438	9	12dec17_18nov17_WSB_f2_sp1_21_rev_9	1	0			1	58					18nov17_WSB_f2	WSB female	WSB	female	Dom	M.musculus					0.446153846153846				72	0
12dec17_18nov17_WSB_f2_sp1_12_rev	121	3.507	0.029031	9	12dec17_18nov17_WSB_f2_sp1_12_rev_9	1	0			1	54				faint flanking COs	18nov17_WSB_f2	WSB female	WSB	female	Dom	M.musculus					0.446280991735537				67	0
8feb18_1feb18_KAZ_f1_sp1_3_rev	112	5.8127	0.051992	9	8feb18_1feb18_KAZ_f1_sp1_3_rev_9	1	0			1	50					1feb18_KAZ_f1	KAZ female	KAZ	female	Musc	M.musculus					0.446428571428571				62	0
11dec17_18nov17_WSB_f1_sp1_8_rev	103	6.8012	0.06605	23	11dec17_18nov17_WSB_f1_sp1_8_rev_23	1	0			1	46					18nov17_WSB_f1	WSB female	WSB	female	Dom	M.musculus					0.446601941747573				57	0
8feb18_1feb18_KAZ_f1_sp1_28_rev	94	3.8992	0.041295	1	8feb18_1feb18_KAZ_f1_sp1_28_rev_1	1	0			1	42					1feb18_KAZ_f1	KAZ female	KAZ	female	Musc	M.musculus					0.446808510638298				52	0
12dec17_18nov17_WSB_f2_sp1_15_rev	85	2.6471	0.031276	11	12dec17_18nov17_WSB_f2_sp1_15_rev_11	1	0			1	38					18nov17_WSB_f2	WSB female	WSB	female	Dom	M.musculus					0.447058823529412				47	0
29nov17_16nov17_MSM_f1_sp1_1_rev	76	4.6254	0.060903	10	29nov17_16nov17_MSM_f1_sp1_1_rev_10	1	0			1	34					16nov17_MSM_f1	MSM female	MSM	female	Mol	M.musculus					0.447368421052632				42	0
8feb18_1feb18_KAZ_f1_sp1_4_rev	143	4.2416	0.029663	4	8feb18_1feb18_KAZ_f1_sp1_4_rev_4	1	0			1	64					1feb18_KAZ_f1	KAZ female	KAZ	female	Musc	M.musculus					0.447552447552448				79	0
8feb17_4jan17_LEW_f1_sp1_5_rev	105	4.7276	0.045083	13	8feb17_4jan17_LEW_f1_sp1_5_rev_13	1	0			1	47					4jan17_LEW_f1	LEW female	LEW	female	Dom	M.musculus					0.447619047619048				58	0
14dec17_18nov17_WSB_f3_sp1_34_rev	105	1.4706	0.013995	9	14dec17_18nov17_WSB_f3_sp1_34_rev_9	1	0			1	47					18nov17_WSB_f3	WSB female	WSB	female	Dom	M.musculus					0.447619047619048				58	0
16feb16_17mar16_G_f4_sp1_9_rev	134	5.4312	0.040633	15	16feb16_17mar16_G_f4_sp1_9_rev_15	1	0			1	60					17mar16_G_f4	G female	G	female	Dom	M.musculus					0.447761194029851				74	0
5jan19_27oct18_SKIVE_m2_sp1_6_rev	67	3.4375	0.051285	20	5jan19_27oct18_SKIVE_m2_sp1_6_rev_20	1	0			1	30					27oct18_SKIVE_m2	SKIVE male	SKIVE	male	Musc	M.musculus					0.447761194029851				37	1
7feb18_11jan18_KAZ_m4_sp1_23_rev	96	2.0588	0.021394	10	7feb18_11jan18_KAZ_m4_sp1_23_rev_10	1	0			1	43					11jan18_KAZ_m4	KAZ male	KAZ	male	Musc	M.musculus					0.447916666666667				53	0
4dec17_16nov17_MSM_f2_sp1_27_rev	96	3.7648	0.039248	9	4dec17_16nov17_MSM_f2_sp1_27_rev_9	1	0			1	43					16nov17_MSM_f2	MSM female	MSM	female	Mol	M.musculus					0.447916666666667				53	0
5aug17_14jul17_MSM_f1_sp1_20_rev	212	7.3442	0.034675	5	5aug17_14jul17_MSM_f1_sp1_20_rev_5	1	0			1	95					14jul17_MSM_f1	MSM female	MSM	female	Mol	M.musculus					0.44811320754717				117	0
15mar16_16jan16_G_f1_sp1_4_rev	87	5.2231	0.0602	17	15mar16_16jan16_G_f1_sp1_4_rev_17	1	0			1	39					16jan16_G_f1	G female	G	female	Dom	M.musculus					0.448275862068966				48	0
8feb17_17mar16_G_f5_sp1_9_rev	87	7.6414	0.087433	2	8feb17_17mar16_G_f5_sp1_9_rev_2	1	0			1	39					17mar16_G_f5	G female	G	female	Dom	M.musculus					0.448275862068966				48	0
4jun19_28sep18_MOLF_m1_sp1_6_rev	58	4.28	0.074289	6	4jun19_28sep18_MOLF_m1_sp1_6_rev_6	1	0			1	26					28sep18_MOLF_m1	MOLF male	MOLF	male	Mol	M.musculus					0.448275862068966				32	0
8feb18_1feb18_KAZ_f1_sp1_12_rev	78	5.5374	0.071061	3	8feb18_1feb18_KAZ_f1_sp1_12_rev_3	1	0			1	35					1feb18_KAZ_f1	KAZ female	KAZ	female	Musc	M.musculus					0.448717948717949				43	0
8feb17_4jan17_LEW_f1_sp1_2_rev	156	8.6882	0.055614	7	8feb17_4jan17_LEW_f1_sp1_2_rev_7	1	0			1	70				faint foci below	4jan17_LEW_f1	LEW female	LEW	female	Dom	M.musculus					0.448717948717949				86	0
10apr15_31mar15_WSB_m1_sp1_4_rev	78	2.2857	0.029262	8	10apr15_31mar15_WSB_m1_sp1_4_rev_8	1	0			1	35					31mar15_WSB_m1	WSB male	WSB	male	Dom	M.musculus					0.448717948717949				43	0
23jul19_28sep18_CZECH_m2_sp1_13.1_rev	98	5.661	0.05779	9	23jul19_28sep18_CZECH_m2_sp1_13.1_rev_9	1	0			1	44					28sep18_CZECH_m2	CZECH male	CZECH	male	Musc	M.musculus					0.448979591836735				54	0
15mar17_13jan17_LEW_f3_sp1_1_rev	49	5.5077	0.11188	23	15mar17_13jan17_LEW_f3_sp1_1_rev_23	1	0			1	22					13jan17_LEW_f3	LEW female	LEW	female	Dom	M.musculus					0.448979591836735				27	0
14dec17_18nov17_WSB_f3_sp1_35_rev	49	2.623	0.053619	1	14dec17_18nov17_WSB_f3_sp1_35_rev_1	1	0			1	22					18nov17_WSB_f3	WSB female	WSB	female	Dom	M.musculus					0.448979591836735				27	0
1mar18_1feb18_KAZ_f3_sp1_2_rev	158	4.1492	0.02619	14	1mar18_1feb18_KAZ_f3_sp1_2_rev_14	1	0			1	71					1feb18_KAZ_f3	KAZ female	KAZ	female	Musc	M.musculus					0.449367088607595				87	0
9aug15_23apr15_PWD_f2_sp1_12_rev	89	6.9812	0.078021	27	9aug15_23apr15_PWD_f2_sp1_12_rev_27	1	0			1	40					23apr15_PWD_f2	PWD female	PWD	female	Musc	M.musculus					0.449438202247191				49	0
7feb18_11jan18_KAZ_m4_sp1_14_rev	109	4.1176	0.037655	4	7feb18_11jan18_KAZ_m4_sp1_14_rev_4	1	0			1	49					11jan18_KAZ_m4	KAZ male	KAZ	male	Musc	M.musculus					0.44954128440367				60	0
12may15_30sep14_G_m5_sp1_19_rev	80	3.7959	0.047324	1	12may15_30sep14_G_m5_sp1_19_rev_1	1	0			1	36				faint middle foci	30sep14_G_m5	G male	G	male	Dom	M.musculus					0.45				44	0
27aug15_12jun15_WSB_m2_sp1_9.2_rev	60	2.3529	0.039277	1	27aug15_12jun15_WSB_m2_sp1_9.2_rev_1	1	0			1	27					12jun15_WSB_m2	WSB male	WSB	male	Dom	M.musculus					0.45				33	0
12feb15_13oct14_G_f2_sp1_10_rev	131	1.1268	0.0086101	5	12feb15_13oct14_G_f2_sp1_10_rev_5	1	0			1	59					13oct14_G_f2	G female	G	female	Dom	M.musculus					0.450381679389313				72	0
15mar17_13jan17_LEW_f3_sp1_29_rev	131	3.3333	0.025467	19	15mar17_13jan17_LEW_f3_sp1_29_rev_19	1	0			1	59				2 faint flanking foci	13jan17_LEW_f3	LEW female	LEW	female	Dom	M.musculus					0.450381679389313				72	0
24may17_17mar16_G_f5_sp1_8_rev	111	3.5287	0.031704	12	24may17_17mar16_G_f5_sp1_8_rev_12	1	0			1	50					17mar16_G_f5	G female	G	female	Dom	M.musculus					0.45045045045045				61	0
13sep18_28jun18_MOLF_m1_sp1_20_rev	82	2	0.024367	13	13sep18_28jun18_MOLF_m1_sp1_20_rev_13	1	0			1	37				2 faint flanking foci	28jun18_MOLF_m1	MOLF male	MOLF	male	Mol	M.musculus					0.451219512195122				45	0
26dec17_18nov17_WSB_f4_sp1_1_rev	82	0.92308	0.011255	3	26dec17_18nov17_WSB_f4_sp1_1_rev_3	1	0			1	37					18nov17_WSB_f4	WSB female	WSB	female	Dom	M.musculus					0.451219512195122				45	0
26dec17_18nov17_WSB_f4_sp1_17_rev	82	3.6111	0.044014	6	26dec17_18nov17_WSB_f4_sp1_17_rev_6	1	0			1	37					18nov17_WSB_f4	WSB female	WSB	female	Dom	M.musculus					0.451219512195122				45	0
9aug15_17apr15_PWD_f2_sp1_22_rev	113	7.4826	0.066422	22	9aug15_17apr15_PWD_f2_sp1_22_rev_22	1	0			1	51					17apr15_PWD_f2	PWD female	PWD	female	Musc	M.musculus					0.451327433628319				62	0
29nov17_16nov17_MSM_f1_sp1_1_rev	62	3.1746	0.051043	6	29nov17_16nov17_MSM_f1_sp1_1_rev_6	1	0			1	28					16nov17_MSM_f1	MSM female	MSM	female	Mol	M.musculus					0.451612903225806				34	0
12dec17_18nov17_WSB_f2_sp1_4_rev	95	6.4445	0.06757	6	12dec17_18nov17_WSB_f2_sp1_4_rev_6	1	0			1	43					18nov17_WSB_f2	WSB female	WSB	female	Dom	M.musculus					0.452631578947368				52	0
4dec17_16nov17_MSM_f2_sp1_25.1_rev	128	4.058	0.03182	2	4dec17_16nov17_MSM_f2_sp1_25.1_rev_2	1	0			1	58					16nov17_MSM_f2	MSM female	MSM	female	Mol	M.musculus					0.453125				70	0
8jun15_23apr15_PWD_f2_sp1_20_rev	64	4.7535	0.07408	13	8jun15_23apr15_PWD_f2_sp1_20_rev_13	1	0			1	29					23apr15_PWD_f2	PWD female	PWD	female	Musc	M.musculus					0.453125				35	0
12dec17_18nov17_WSB_f2_sp1_5_rev	64	3.6832	0.057862	19	12dec17_18nov17_WSB_f2_sp1_5_rev_19	1	0			1	29					18nov17_WSB_f2	WSB female	WSB	female	Dom	M.musculus					0.453125				35	0
1mar18_1feb18_KAZ_f3_sp1_2_rev	99	8.4504	0.085143	15	1mar18_1feb18_KAZ_f3_sp1_2_rev_15	1	0			1	45					1feb18_KAZ_f3	KAZ female	KAZ	female	Musc	M.musculus					0.454545454545455				54	0
8feb17_20dec16_LEW_m1_sp1_24.1_rev	44	5.0306	0.11365	12	8feb17_20dec16_LEW_m1_sp1_24.1_rev_12	1	0			1	20					20dec16_LEW_m1	LEW male	LEW	male	Dom	M.musculus					0.454545454545455				24	0
8feb17_4jan17_LEW_f1_sp1_4_rev	77	3.9381	0.051284	7	8feb17_4jan17_LEW_f1_sp1_4_rev_7	1	0			1	35					4jan17_LEW_f1	LEW female	LEW	female	Dom	M.musculus					0.454545454545455				42	0
2jul17_20dec16_LEW_m3_sp1_4_rev	90	4.4606	0.049778	13	2jul17_20dec16_LEW_m3_sp1_4_rev_13	1	0			1	41					20dec16_LEW_m3	LEW male	LEW	male	Dom	M.musculus					0.455555555555556				49	0
15mar17_13jan17_LEW_f3_sp1_12_rev	90	4.3775	0.04881	9	15mar17_13jan17_LEW_f3_sp1_12_rev_9	1	0			1	41					13jan17_LEW_f3	LEW female	LEW	female	Dom	M.musculus					0.455555555555556				49	0
10jun15_24mar15_G_m1_sp1_16.1_rev	79	3.1358	0.039806	3	10jun15_24mar15_G_m1_sp1_16.1_rev_3	1	0			1	36					24mar15_G_m1	G male	G	male	Dom	M.musculus					0.455696202531646				43	0
26jan18_11jan18_KAZ_m3_sp1_15_rev	68	4.9387	0.07301	8	26jan18_11jan18_KAZ_m3_sp1_15_rev_8	1	0			1	31					11jan18_KAZ_m3	KAZ male	KAZ	male	Musc	M.musculus					0.455882352941176				37	0
2aug19_28sep18_MOLF_m2_sp1_22_rev	114	6.257	0.054967	6	2aug19_28sep18_MOLF_m2_sp1_22_rev_6	1	0			1	52					28sep18_MOLF_m2	MOLF male	MOLF	male	Mol	M.musculus					0.456140350877193				62	0
26dec17_18nov17_WSB_f4_sp1_8_rev	103	2.7273	0.026537	1	26dec17_18nov17_WSB_f4_sp1_8_rev_1	1	0			1	47					18nov17_WSB_f4	WSB female	WSB	female	Dom	M.musculus					0.456310679611651				56	0
4dec17_16nov17_MSM_f2_sp1_27_rev	92	4.0414	0.043745	1	4dec17_16nov17_MSM_f2_sp1_27_rev_1	1	0			1	42					16nov17_MSM_f2	MSM female	MSM	female	Mol	M.musculus					0.456521739130435				50	0
20may15_17apr15_PWD_f4_sp1_20_rev	162	6.612	0.040914	17	20may15_17apr15_PWD_f4_sp1_20_rev_17	1	0			1	74					17apr15_PWD_f4	PWD female	PWD	female	Musc	M.musculus					0.45679012345679				88	0
19jan17_4jan17_LEW_f7_sp1_9_rev	105	4.4113	0.042074	22	19jan17_4jan17_LEW_f7_sp1_9_rev_22	1	0			1	48					4jan17_LEW_f7	LEW female	LEW	female	Dom	M.musculus					0.457142857142857				57	0
2aug15_8oct14_PWD_f4_sp1_11.2_rev	70	6.0516	0.085849	18	2aug15_8oct14_PWD_f4_sp1_11.2_rev_18	1	0			1	32					8oct14_PWD_f4	PWD female	PWD	female	Musc	M.musculus					0.457142857142857				38	0
12dec17_18nov17_WSB_f2_sp1_14_rev	83	3.3966	0.041083	12	12dec17_18nov17_WSB_f2_sp1_14_rev_12	1	0			1	38					18nov17_WSB_f2	WSB female	WSB	female	Dom	M.musculus					0.457831325301205				45	0
22jul19_26oct18_SKIVE_f3_sp1_12.2_rev	155	7.438	0.047981	25	22jul19_26oct18_SKIVE_f3_sp1_12.2_rev_25	1	0			1	71					26oct18_SKIVE_f3	SKIVE female	SKIVE	female	Musc	M.musculus					0.45806451612903226				84	0
7feb18_11jan18_KAZ_m4_sp1_28_rev	96	8.2012	0.085024	12	7feb18_11jan18_KAZ_m4_sp1_28_rev_12	1	0			1	44					11jan18_KAZ_m4	KAZ male	KAZ	male	Musc	M.musculus					0.458333333333333				52	0
4jun19_28sep18_MOLF_m1_sp1_27.2_rev	96	5.5888	0.058131	1	4jun19_28sep18_MOLF_m1_sp1_27.2_rev_1	1	0			1	44					28sep18_MOLF_m1	MOLF male	MOLF	male	Mol	M.musculus					0.458333333333333				52	0
19jan17_4jan17_LEW_f6_sp1_35_rev	85	4.8826	0.057124	4	19jan17_4jan17_LEW_f6_sp1_35_rev_4	1	0			1	39					4jan17_LEW_f6	LEW female	LEW	female	Dom	M.musculus					0.458823529411765				46	0
9aug15_23apr15_PWD_f2_sp1_5_rev	122	1.2121	0.0099683	5	9aug15_23apr15_PWD_f2_sp1_5_rev_5	1	0			1	56					23apr15_PWD_f2	PWD female	PWD	female	Musc	M.musculus					0.459016393442623				66	0
4jun19_28sep18_MOLF_m1_sp1_5_rev	37	5.8529	0.1588	9	4jun19_28sep18_MOLF_m1_sp1_5_rev_9	1	0			1	17					28sep18_MOLF_m1	MOLF male	MOLF	male	Mol	M.musculus					0.459459459459459				20	0
23jul19_28sep18_CZECH_m2_sp1_1_rev	87	3.8044	0.04374	13	23jul19_28sep18_CZECH_m2_sp1_1_rev_13	1	0			1	40					28sep18_CZECH_m2	CZECH male	CZECH	male	Musc	M.musculus					0.459770114942529				47	0
17nov16_17mar16_G_f1_sp1_10_rev	137	3.3534	0.024428	13	17nov16_17mar16_G_f1_sp1_10_rev_13	1	0			1	63					17mar16_G_f1	G female	G	female	Dom	M.musculus					0.45985401459854				74	0
5jan19_27oct18_SKIVE_m2_sp1_13_rev	50	4.5007	0.089499	1	5jan19_27oct18_SKIVE_m2_sp1_13_rev_1	1	0			1	23					27oct18_SKIVE_m2	SKIVE male	SKIVE	male	Musc	M.musculus					0.46				27	1
10jun19_31may19_SKIVE_f6_sp1_48_rev	126	7.1212	0.056503	16	10jun19_31may19_SKIVE_f6_sp1_48_rev_16	1	0			1	58					31may19_SKIVE_f6	SKIVE female	SKIVE	female	Musc	M.musculus					0.46031746031746				68	0
16feb18_1feb18_KAZ_f4_sp1_18_rev	89	4.6449	0.051923	6	16feb18_1feb18_KAZ_f4_sp1_18_rev_6	1	0			1	41					1feb18_KAZ_f4	KAZ female	KAZ	female	Musc	M.musculus					0.460674157303371				48	0
8feb17_20dec16_LEW_m1_sp1_32.2_rev	89	6.0132	0.067217	6	8feb17_20dec16_LEW_m1_sp1_32.2_rev_6	1	0			1	41					20dec16_LEW_m1	LEW male	LEW	male	Dom	M.musculus					0.460674157303371				48	0
5jan19_27oct18_SKIVE_m2_sp1_11_rev	89	3.0759	0.0346	10	5jan19_27oct18_SKIVE_m2_sp1_11_rev_10	1	0			1	41					27oct18_SKIVE_m2	SKIVE male	SKIVE	male	Musc	M.musculus					0.460674157303371				48	1
15mar16_16jan16_G_f1_sp1_4_rev	102	3.4869	0.034085	8	15mar16_16jan16_G_f1_sp1_4_rev_8	1	0			1	47					16jan16_G_f1	G female	G	female	Dom	M.musculus					0.46078431372549				55	0
4dec17_16nov17_MSM_f2_sp1_16_rev	128	2.6471	0.020742	2	4dec17_16nov17_MSM_f2_sp1_16_rev_2	1	0			1	59					16nov17_MSM_f2	MSM female	MSM	female	Mol	M.musculus					0.4609375				69	0
12oct18_26sep18_CZECH_m1_sp1_6.2_rev	65	6.744	0.10357	12	12oct18_26sep18_CZECH_m1_sp1_6.2_rev_12	1	0			1	30					26sep18_CZECH_m1	CZECH male	CZECH	male	Musc	M.musculus					0.461538461538462				35	0
15mar17_13jan17_LEW_f3_sp1_26_rev	78	2.6087	0.033279	18	15mar17_13jan17_LEW_f3_sp1_26_rev_18	1	0			1	36					13jan17_LEW_f3	LEW female	LEW	female	Dom	M.musculus					0.461538461538462				42	0
8feb17_20dec16_LEW_m1_sp1_15.2_rev	65	5.7454	0.088021	17	8feb17_20dec16_LEW_m1_sp1_15.2_rev_17	1	0			1	30					20dec16_LEW_m1	LEW male	LEW	male	Dom	M.musculus					0.461538461538462				35	0
13sep18_28jun18_MOLF_m1_sp1_21.2_rev	78	4.0298	0.051559	15	13sep18_28jun18_MOLF_m1_sp1_21.2_rev_15	1	0			1	36					28jun18_MOLF_m1	MOLF male	MOLF	male	Mol	M.musculus					0.461538461538462				42	0
9aug15_17apr15_PWD_f2_sp1_8_rev	104	5.1773	0.049978	19	9aug15_17apr15_PWD_f2_sp1_8_rev_19	1	0			1	48					17apr15_PWD_f2	PWD female	PWD	female	Musc	M.musculus					0.461538461538462				56	0
7mar15_1mar15_PWD_m1_sp4_16_rev	78	3.3435	0.04272	6	7mar15_1mar15_PWD_m1_sp4_16_rev_6	1	0			1	36					1mar15_PWD_m1	PWD male	PWD	male	Musc	M.musculus					0.461538461538462				42	1
12dec17_18nov17_WSB_f2_sp1_16_rev	52	2.753	0.052542	11	12dec17_18nov17_WSB_f2_sp1_16_rev_11	1	0			1	24					18nov17_WSB_f2	WSB female	WSB	female	Dom	M.musculus					0.461538461538462				28	0
12dec17_18nov17_WSB_f2_sp1_19_rev	91	5.4909	0.060378	18	12dec17_18nov17_WSB_f2_sp1_19_rev_18	1	0			1	42					18nov17_WSB_f2	WSB female	WSB	female	Dom	M.musculus					0.461538461538462				49	0
3mar15_13jan17_LEW_m1_sp1_4_rev	119	5.0811	0.042556	14	3mar15_13jan17_LEW_m1_sp1_4_rev_14	1	0			1	55					13jan17_LEW_m1	LEW male	LEW	male	Dom	M.musculus					0.46218487394958				64	0
5jun18_21may18_KAZ_m2_sp1_6_rev	67	4.4248	0.066133	10	5jun18_21may18_KAZ_m2_sp1_6_rev_10	1	0			1	31					21may18_KAZ_m2	KAZ male	KAZ	male	Musc	M.musculus					0.462686567164179				36	0
2jul17_20dec16_LEW_m3_sp1_17_rev	67	2.9366	0.044099	1	2jul17_20dec16_LEW_m3_sp1_17_rev_1	1	0			1	31					20dec16_LEW_m3	LEW male	LEW	male	Dom	M.musculus					0.462686567164179				36	0
17mar15_10mar15_PWD_m1_sp1_12.1_rev	54	4.9396	0.091965	10	17mar15_10mar15_PWD_m1_sp1_12.1_rev_10	1	0			1	25					10mar15_PWD_m1	PWD male	PWD	male	Musc	M.musculus					0.462962962962963				29	1
9apr18_1feb18_LEW_f1_sp1_9_rev	82	4.5599	0.055685	19	9apr18_1feb18_LEW_f1_sp1_9_rev_19	1	0			1	38					1feb18_LEW_f1	LEW female	LEW	female	Dom	M.musculus					0.463414634146341				44	0
20aug15_22jun15_G_m1_sp2_11_rev	110	5.6327	0.05114	6	20aug15_22jun15_G_m1_sp2_11_rev_6	1	0			1	51					22jun15_G_m1	G male	G	male	Dom	M.musculus					0.463636363636364				59	0
10jun19_31may19_SKIVE_f6_sp1_21_rev	110	3.3333	0.030324	4	10jun19_31may19_SKIVE_f6_sp1_21_rev_4	1	0			1	51					31may19_SKIVE_f6	SKIVE female	SKIVE	female	Musc	M.musculus					0.463636363636364				59	0
12dec17_18nov17_WSB_f2_sp1_23_rev	110	2.3529	0.021346	11	12dec17_18nov17_WSB_f2_sp1_23_rev_11	1	0			1	51					18nov17_WSB_f2	WSB female	WSB	female	Dom	M.musculus					0.463636363636364				59	0
27mar16_6mar16_G_m1_sp1_10_rev	69	6.5807	0.095605	11	27mar16_6mar16_G_m1_sp1_10_rev_11	1	0			1	32					6mar16_G_m1	G male	G	male	Dom	M.musculus					0.463768115942029				37	0
1mar16_20feb16_G_f3_sp1_7_rev	97	5.9081	0.060898	10	1mar16_20feb16_G_f3_sp1_7_rev_10	1	0			1	45					20feb16_G_f3	G female	G	female	Dom	M.musculus					0.463917525773196				52	0
8feb18_1feb18_KAZ_f1_sp1_20_rev	97	7.4325	0.076553	24	8feb18_1feb18_KAZ_f1_sp1_20_rev_24	1	0			1	45					1feb18_KAZ_f1	KAZ female	KAZ	female	Musc	M.musculus					0.463917525773196				52	0
23jul19_28sep18_CZECH_m2_sp1_13.1_rev	56	4.5714	0.081705	18	23jul19_28sep18_CZECH_m2_sp1_13.1_rev_18	1	0			1	26					28sep18_CZECH_m2	CZECH male	CZECH	male	Musc	M.musculus					0.464285714285714				30	0
10jun15_24mar15_G_m1_sp1_12_rev	84	2.3529	0.028134	9	10jun15_24mar15_G_m1_sp1_12_rev_9	1	0			1	39					24mar15_G_m1	G male	G	male	Dom	M.musculus					0.464285714285714				45	0
4dec17_16nov17_MSM_f2_sp1_25.1_rev	112	8.4398	0.075626	11	4dec17_16nov17_MSM_f2_sp1_25.1_rev_11	1	0			1	52					16nov17_MSM_f2	MSM female	MSM	female	Mol	M.musculus					0.464285714285714				60	0
8jun15_23apr15_PWD_f2_sp1_19_rev	112	5.8413	0.05212	2	8jun15_23apr15_PWD_f2_sp1_19_rev_2	1	0			1	52					23apr15_PWD_f2	PWD female	PWD	female	Musc	M.musculus					0.464285714285714				60	0
10jun15_18may15_WSB_m1_sp1_21_rev	56	3.9137	0.069333	14	10jun15_18may15_WSB_m1_sp1_21_rev_14	1	0			1	26					18may15_WSB_m1	WSB male	WSB	male	Dom	M.musculus					0.464285714285714				30	0
27mar16_6mar16_G_m1_sp1_8_rev	99	5.0678	0.050992	12	27mar16_6mar16_G_m1_sp1_8_rev_12	1	0			1	46					6mar16_G_m1	G male	G	male	Dom	M.musculus					0.464646464646465				53	0
16nov16_17mar16_G_f5_sp1_1_rev	86	6.4453	0.074986	10	16nov16_17mar16_G_f5_sp1_1_rev_10	1	0			1	40					17mar16_G_f5	G female	G	female	Dom	M.musculus					0.465116279069767				46	0
14dec17_18nov17_WSB_f3_sp1_29_rev	116	4.0458	0.035014	4	14dec17_18nov17_WSB_f3_sp1_29_rev_4	1	0			1	54					18nov17_WSB_f3	WSB female	WSB	female	Dom	M.musculus					0.46551724137931				62	0
12dec17_18nov17_WSB_f2_sp1_2_rev	73	2.8571	0.038968	13	12dec17_18nov17_WSB_f2_sp1_2_rev_13	1	0			1	34				faint foci near end	18nov17_WSB_f2	WSB female	WSB	female	Dom	M.musculus					0.465753424657534				39	0
19jan17_4jan17_LEW_f7_sp1_28_rev	75	1.4925	0.019931	9	19jan17_4jan17_LEW_f7_sp1_28_rev_9	1	0			1	35					4jan17_LEW_f7	LEW female	LEW	female	Dom	M.musculus					0.466666666666667				40	0
13mar15_28feb15_PWD_f2_sp1_31_rev	105	3.9184	0.037161	13	13mar15_28feb15_PWD_f2_sp1_31_rev_13	1	0			1	49					28feb15_PWD_f2	PWD female	PWD	female	Musc	M.musculus					0.466666666666667				56	0
20jul15_18may15_PWD_m1_sp1_20.2_rev	90	4.1186	0.045933	10	20jul15_18may15_PWD_m1_sp1_20.2_rev_10	1	0			1	42					18may15_PWD_m1	PWD male	PWD	male	Musc	M.musculus					0.466666666666667				48	1
11jan19_27oct18_SKIVE_m1_sp1_30_rev	45	2.9032	0.063913	1	11jan19_27oct18_SKIVE_m1_sp1_30_rev_1	1	0			1	21					27oct18_SKIVE_m1	SKIVE male	SKIVE	male	Musc	M.musculus					0.466666666666667				24	1
18jul19_31may19_SKIVE_m2_sp1_19_rev	90	2.2222	0.02458	11	18jul19_31may19_SKIVE_m2_sp1_19_rev_11	1	0			1	42					31may19_SKIVE_m2	SKIVE male	SKIVE	male	Musc	M.musculus					0.466666666666667				48	1
14dec17_18nov17_WSB_f3_sp1_10_rev	60	3.488	0.058582	13	14dec17_18nov17_WSB_f3_sp1_10_rev_13	1	0			1	28					18nov17_WSB_f3	WSB female	WSB	female	Dom	M.musculus					0.466666666666667				32	0
8feb18_1feb18_KAZ_f1_sp1_26_rev	92	4.3575	0.047514	18	8feb18_1feb18_KAZ_f1_sp1_26_rev_18	1	0			1	43					1feb18_KAZ_f1	KAZ female	KAZ	female	Musc	M.musculus					0.467391304347826				49	0
3mar15_13jan17_LEW_m1_sp1_24.2_rev	77	5.4285	0.070871	7	3mar15_13jan17_LEW_m1_sp1_24.2_rev_7	1	0			1	36					13jan17_LEW_m1	LEW male	LEW	male	Dom	M.musculus					0.467532467532468				41	0
19oct15_12oct15_G_m1_sp1_9_rev	62	3.1429	0.050362	6	19oct15_12oct15_G_m1_sp1_9_rev_6	1	0			1	29					12oct15_G_m1	G male	G	male	Dom	M.musculus					0.467741935483871				33	0
11jan19_27oct18_SKIVE_m1_sp1_31_rev	62	4.5352	0.072812	8	11jan19_27oct18_SKIVE_m1_sp1_31_rev_8	1	0			1	29					27oct18_SKIVE_m1	SKIVE male	SKIVE	male	Musc	M.musculus					0.467741935483871				33	1
26dec17_18nov17_WSB_f4_sp1_26_rev	124	2.1875	0.017657	12	26dec17_18nov17_WSB_f4_sp1_26_rev_12	1	0			1	58					18nov17_WSB_f4	WSB female	WSB	female	Dom	M.musculus					0.467741935483871				66	0
18jul19_1mar19_MOLF_m1_sp1_16_rev	109	3.5463	0.032469	7	18jul19_1mar19_MOLF_m1_sp1_16_rev_7	1	0			1	51					1mar19_MOLF_m1	MOLF male	MOLF	male	Mol	M.musculus					0.467889908256881				58	0
20may15_17apr15_PWD_f4_sp1_12_rev	156	7.5497	0.048377	7	20may15_17apr15_PWD_f4_sp1_12_rev_7	1	0			1	73				2 flanking foci	17apr15_PWD_f4	PWD female	PWD	female	Musc	M.musculus					0.467948717948718				83	0
10jun19_31may19_SKIVE_f6_sp1_59.1_rev	94	10.5529	0.11245	2	10jun19_31may19_SKIVE_f6_sp1_59.1_rev_2	1	0			1	44					31may19_SKIVE_f6	SKIVE female	SKIVE	female	Musc	M.musculus					0.468085106382979				50	0
12dec17_18nov17_WSB_f2_sp1_20_rev	126	5.4811	0.043386	7	12dec17_18nov17_WSB_f2_sp1_20_rev_7	1	0			1	59					18nov17_WSB_f2	WSB female	WSB	female	Dom	M.musculus					0.468253968253968				67	0
10jun19_31may19_SKIVE_f6_sp1_54_rev	79	2.9851	0.03761	11	10jun19_31may19_SKIVE_f6_sp1_54_rev_11	1	0			1	37					31may19_SKIVE_f6	SKIVE female	SKIVE	female	Musc	M.musculus					0.468354430379747				42	0
2jul17_20dec16_LEW_m3_sp1_10_rev	64	8.0444	0.12666	13	2jul17_20dec16_LEW_m3_sp1_10_rev_13	1	0			1	30					20dec16_LEW_m3	LEW male	LEW	male	Dom	M.musculus					0.46875				34	0
15mar17_13jan17_LEW_f3_sp1_7_rev	64	4.301	0.067476	22	15mar17_13jan17_LEW_f3_sp1_7_rev_22	1	0			1	30					13jan17_LEW_f3	LEW female	LEW	female	Dom	M.musculus					0.46875				34	0
2aug19_28sep18_MOLF_m2_sp1_14.1_rev	81	11.4495	0.1417	5	2aug19_28sep18_MOLF_m2_sp1_14.1_rev_5	1	0			1	38					28sep18_MOLF_m2	MOLF male	MOLF	male	Mol	M.musculus					0.469135802469136				43	0
12dec17_18nov17_WSB_f2_sp1_5_rev	81	3.9943	0.049075	17	12dec17_18nov17_WSB_f2_sp1_5_rev_17	1	0			1	38					18nov17_WSB_f2	WSB female	WSB	female	Dom	M.musculus					0.469135802469136				43	0
6mar18_1feb18_LEW_m1_sp1_10_rev	98	5.458	0.055741	8	6mar18_1feb18_LEW_m1_sp1_10_rev_8	1	0			1	46					1feb18_LEW_m1	LEW male	LEW	male	Dom	M.musculus					0.469387755102041				52	0
4dec17_16nov17_MSM_f2_sp1_34_rev	147	5.3659	0.036404	9	4dec17_16nov17_MSM_f2_sp1_34_rev_9	1	0			1	69					16nov17_MSM_f2	MSM female	MSM	female	Mol	M.musculus					0.469387755102041				78	0
10jan18_13jan17_LEW_f1_sp1_14_rev	66	4.3	0.065532	6	10jan18_13jan17_LEW_f1_sp1_14_rev_6	1	0			1	31					13jan17_LEW_f1	LEW female	LEW	female	Dom	M.musculus					0.46969696969697				35	0
19jan17_4jan17_LEW_f7_sp1_4_rev	132	4.6154	0.035011	19	19jan17_4jan17_LEW_f7_sp1_4_rev_19	1	0			1	62					4jan17_LEW_f7	LEW female	LEW	female	Dom	M.musculus					0.46969696969697				70	0
20may15_17apr15_PWD_f4_sp1_4_rev	83	6.5525	0.079317	8	20may15_17apr15_PWD_f4_sp1_4_rev_8	1	0			1	39					17apr15_PWD_f4	PWD female	PWD	female	Musc	M.musculus					0.469879518072289				44	0
15mar17_13jan17_LEW_f3_sp1_26_rev	100	5.6625	0.05676	21	15mar17_13jan17_LEW_f3_sp1_26_rev_21	1	0			1	47					13jan17_LEW_f3	LEW female	LEW	female	Dom	M.musculus					0.47				53	0
19jan17_4jan17_LEW_f6_sp1_18_rev	51	2.4242	0.047745	3	19jan17_4jan17_LEW_f6_sp1_18_rev_3	1	0			1	24					4jan17_LEW_f6	LEW female	LEW	female	Dom	M.musculus					0.470588235294118				27	0
13sep18_28jun18_MOLF_m1_sp1_18.1_rev	68	4.4423	0.065175	1	13sep18_28jun18_MOLF_m1_sp1_18.1_rev_1	1	0			1	32					28jun18_MOLF_m1	MOLF male	MOLF	male	Mol	M.musculus					0.470588235294118				36	0
11jan19_27oct18_SKIVE_m1_sp1_23.1_rev	68	6.1714	0.091386	5	11jan19_27oct18_SKIVE_m1_sp1_23.1_rev_5	1	0			1	32					27oct18_SKIVE_m1	SKIVE male	SKIVE	male	Musc	M.musculus					0.470588235294118				36	1
12dec17_18nov17_WSB_f2_sp1_8_rev	119	5.8279	0.049128	12	12dec17_18nov17_WSB_f2_sp1_8_rev_12	1	0			1	56					18nov17_WSB_f2	WSB female	WSB	female	Dom	M.musculus					0.470588235294118				63	0
12dec17_18nov17_WSB_f2_sp1_9_rev	85	2.8986	0.034036	9	12dec17_18nov17_WSB_f2_sp1_9_rev_9	1	0			1	40					18nov17_WSB_f2	WSB female	WSB	female	Dom	M.musculus					0.470588235294118				45	0
14dec17_18nov17_WSB_f3_sp1_20_rev	85	2.1538	0.025287	16	14dec17_18nov17_WSB_f3_sp1_20_rev_16	1	0			1	40					18nov17_WSB_f3	WSB female	WSB	female	Dom	M.musculus					0.470588235294118				45	0
12dec17_18nov17_WSB_f2_sp1_3_rev	70	5.5064	0.078618	12	12dec17_18nov17_WSB_f2_sp1_3_rev_12	1	0			1	33					18nov17_WSB_f2	WSB female	WSB	female	Dom	M.musculus					0.471428571428571				37	0
2jul17_20dec16_LEW_m3_sp1_14_rev	106	4.601	0.043416	15	2jul17_20dec16_LEW_m3_sp1_14_rev_15	1	0			1	50					20dec16_LEW_m3	LEW male	LEW	male	Dom	M.musculus					0.471698113207547				56	0
17mar15_10mar15_PWD_m1_sp1_5_rev	53	2.8125	0.053013	1	17mar15_10mar15_PWD_m1_sp1_5_rev_1	1	0			1	25					10mar15_PWD_m1	PWD male	PWD	male	Musc	M.musculus					0.471698113207547				28	1
7feb18_11jan18_KAZ_m4_sp1_16.1_rev	89	2.8986	0.032729	18	7feb18_11jan18_KAZ_m4_sp1_16.1_rev_18	1	0			1	42					11jan18_KAZ_m4	KAZ male	KAZ	male	Musc	M.musculus					0.471910112359551				47	0
24may17_17mar16_G_f5_sp1_9_rev	72	4.05	0.056525	18	24may17_17mar16_G_f5_sp1_9_rev_18	1	0			1	34					17mar16_G_f5	G female	G	female	Dom	M.musculus					0.472222222222222				38	0
26jan18_11jan18_KAZ_m3_sp1_23.2_rev	72	3.9169	0.054471	6	26jan18_11jan18_KAZ_m3_sp1_23.2_rev_6	1	0			1	34					11jan18_KAZ_m3	KAZ male	KAZ	male	Musc	M.musculus					0.472222222222222				38	0
10jun15_18may15_WSB_m1_sp1_19_rev	108	6.3774	0.058872	13	10jun15_18may15_WSB_m1_sp1_19_rev_13	1	0			1	51					18may15_WSB_m1	WSB male	WSB	male	Dom	M.musculus					0.472222222222222				57	0
17nov16_17mar16_G_f1_sp1_12_rev	127	6.4849	0.050943	3	17nov16_17mar16_G_f1_sp1_12_rev_3	1	0			1	60					17mar16_G_f1	G female	G	female	Dom	M.musculus					0.47244094488189				67	0
25jul19_28sep18_CZECH_m3_sp1_7_rev	74	6.9826	0.093881	12	25jul19_28sep18_CZECH_m3_sp1_7_rev_12	1	0			1	35					28sep18_CZECH_m3	CZECH male	CZECH	male	Musc	M.musculus					0.472972972972973				39	0
11jan19_27oct18_SKIVE_m1_sp1_21_rev	74	4.4118	0.059335	4	11jan19_27oct18_SKIVE_m1_sp1_21_rev_4	1	0			1	35					27oct18_SKIVE_m1	SKIVE male	SKIVE	male	Musc	M.musculus					0.472972972972973				39	1
8feb18_1feb18_KAZ_f1_sp1_11_rev	93	6.5062	0.070084	4	8feb18_1feb18_KAZ_f1_sp1_11_rev_4	1	0			1	44					1feb18_KAZ_f1	KAZ female	KAZ	female	Musc	M.musculus					0.473118279569892				49	0
10jan18_13jan17_LEW_f1_sp1_14_rev	93	5.8514	0.06293	4	10jan18_13jan17_LEW_f1_sp1_14_rev_4	1	0			1	44					13jan17_LEW_f1	LEW female	LEW	female	Dom	M.musculus					0.473118279569892				49	0
7mar15_1mar15_PWD_m1_sp4_2_rev	93	5.123	0.05513	15	7mar15_1mar15_PWD_m1_sp4_2_rev_15	1	0			1	44					1mar15_PWD_m1	PWD male	PWD	male	Musc	M.musculus					0.473118279569892				49	1
16nov16_17mar16_G_f5_sp1_5_rev	112	5.2777	0.047227	3	16nov16_17mar16_G_f5_sp1_5_rev_3	1	0			1	53					17mar16_G_f5	G female	G	female	Dom	M.musculus					0.473214285714286				59	0
15mar17_13jan17_LEW_f3_sp1_29_rev	131	5.6938	0.043564	12	15mar17_13jan17_LEW_f3_sp1_29_rev_12	1	0			1	62				2 faint flanking foci	13jan17_LEW_f3	LEW female	LEW	female	Dom	M.musculus					0.473282442748092				69	0
19jan17_4jan17_LEW_f6_sp1_11_rev	57	2.5714	0.045068	22	19jan17_4jan17_LEW_f6_sp1_11_rev_22	1	0			1	27					4jan17_LEW_f6	LEW female	LEW	female	Dom	M.musculus					0.473684210526316				30	0
12dec17_18nov17_WSB_f2_sp1_11_rev	76	4.7976	0.063005	1	12dec17_18nov17_WSB_f2_sp1_11_rev_1	1	0			1	36					18nov17_WSB_f2	WSB female	WSB	female	Dom	M.musculus					0.473684210526316				40	0
13mar15_28feb15_PWD_f2_sp1_48.2_rev	116	6.2033	0.053605	17	13mar15_28feb15_PWD_f2_sp1_48.2_rev_17	1	0			1	55					28feb15_PWD_f2	PWD female	PWD	female	Musc	M.musculus					0.474137931034483				61	0
2aug15_8oct14_PWD_f4_sp1_11.1_rev	97	8.0679	0.08335	5	2aug15_8oct14_PWD_f4_sp1_11.1_rev_5	1	0			1	46					8oct14_PWD_f4	PWD female	PWD	female	Musc	M.musculus					0.474226804123711				51	0
11dec17_18nov17_WSB_f1_sp1_5_rev	97	4.3818	0.04505	6	11dec17_18nov17_WSB_f1_sp1_5_rev_6	1	0			1	46					18nov17_WSB_f1	WSB female	WSB	female	Dom	M.musculus					0.474226804123711				51	0
3mar15_13jan17_LEW_m1_sp1_18_rev	78	4.2399	0.054325	7	3mar15_13jan17_LEW_m1_sp1_18_rev_7	1	0			1	37					13jan17_LEW_m1	LEW male	LEW	male	Dom	M.musculus					0.474358974358974				41	0
12dec17_18nov17_WSB_f2_sp1_18_rev	78	4.705	0.060267	17	12dec17_18nov17_WSB_f2_sp1_18_rev_17	1	0			1	37					18nov17_WSB_f2	WSB female	WSB	female	Dom	M.musculus					0.474358974358974				41	0
26dec17_18nov17_WSB_f4_sp1_4_rev	156	2.9508	0.018895	2	26dec17_18nov17_WSB_f4_sp1_4_rev_2	1	0			1	74					18nov17_WSB_f4	WSB female	WSB	female	Dom	M.musculus					0.474358974358974				82	0
16nov16_17mar16_G_f5_sp1_1_rev	137	6.2056	0.045249	12	16nov16_17mar16_G_f5_sp1_1_rev_12	1	0			1	65					17mar16_G_f5	G female	G	female	Dom	M.musculus					0.474452554744526				72	0
14mar16_16jan16_G_f1_sp1_1_rev	59	6.9877	0.11819	12	14mar16_16jan16_G_f1_sp1_1_rev_12	1	0			1	28					16jan16_G_f1	G female	G	female	Dom	M.musculus					0.474576271186441				31	0
22mar15_10mar15_PWD_m1_sp1_5.1_rev	59	4.6474	0.078575	10	22mar15_10mar15_PWD_m1_sp1_5.1_rev_10	1	0			1	28					10mar15_PWD_m1	PWD male	PWD	male	Musc	M.musculus					0.474576271186441				31	1
10jun19_31may19_SKIVE_f6_sp1_10_rev	158	7.2763	0.045985	4	10jun19_31may19_SKIVE_f6_sp1_10_rev_4	1	0			1	75					31may19_SKIVE_f6	SKIVE female	SKIVE	female	Musc	M.musculus					0.474683544303797				83	0
20may15_17apr15_PWD_f4_sp1_23_rev	160	6.0211	0.037698	17	20may15_17apr15_PWD_f4_sp1_23_rev_17	1	0			1	76					17apr15_PWD_f4	PWD female	PWD	female	Musc	M.musculus					0.475				84	0
14dec17_18nov17_WSB_f3_sp1_6_rev	120	5.0354	0.042008	4	14dec17_18nov17_WSB_f3_sp1_6_rev_4	1	0			1	57					18nov17_WSB_f3	WSB female	WSB	female	Dom	M.musculus					0.475				63	0
27mar16_6mar16_G_m2_sp1_3.2_rev	61	3.891	0.063385	14	27mar16_6mar16_G_m2_sp1_3.2_rev_14	1	0			1	29					6mar16_G_m2	G male	G	male	Dom	M.musculus					0.475409836065574				32	0
14dec17_18nov17_WSB_f3_sp1_3_rev	82	3.9958	0.048743	11	14dec17_18nov17_WSB_f3_sp1_3_rev_11	1	0			1	39					18nov17_WSB_f3	WSB female	WSB	female	Dom	M.musculus					0.475609756097561				43	0
26dec17_18nov17_WSB_f4_sp1_4_rev	103	1.7647	0.017145	5	26dec17_18nov17_WSB_f4_sp1_4_rev_5	1	0			1	49					18nov17_WSB_f4	WSB female	WSB	female	Dom	M.musculus					0.475728155339806				54	0
16nov16_17mar16_G_f5_sp1_5_rev	105	2.7692	0.026373	1	16nov16_17mar16_G_f5_sp1_5_rev_1	1	0			1	50					17mar16_G_f5	G female	G	female	Dom	M.musculus					0.476190476190476				55	0
7feb18_11jan18_KAZ_m4_sp1_23_rev	105	6.8527	0.064973	6	7feb18_11jan18_KAZ_m4_sp1_23_rev_6	1	0			1	50					11jan18_KAZ_m4	KAZ male	KAZ	male	Musc	M.musculus					0.476190476190476				55	0
8jun15_23apr15_PWD_f2_sp1_14_rev	189	4.1024	0.021666	6	8jun15_23apr15_PWD_f2_sp1_14_rev_6	1	0			1	90					23apr15_PWD_f2	PWD female	PWD	female	Musc	M.musculus					0.476190476190476				99	0
12dec17_18nov17_WSB_f2_sp1_5_rev	107	4.4797	0.041783	20	12dec17_18nov17_WSB_f2_sp1_5_rev_20	1	0			1	51					18nov17_WSB_f2	WSB female	WSB	female	Dom	M.musculus					0.476635514018692				56	0
8feb18_1feb18_KAZ_f1_sp1_6_rev	86	2.8571	0.033253	9	8feb18_1feb18_KAZ_f1_sp1_6_rev_9	1	0			1	41					1feb18_KAZ_f1	KAZ female	KAZ	female	Musc	M.musculus					0.476744186046512				45	0
11jan19_27oct18_SKIVE_m1_sp1_2.2_rev	65	2.5714	0.039537	12	11jan19_27oct18_SKIVE_m1_sp1_2.2_rev_12	1	0			1	31					27oct18_SKIVE_m1	SKIVE male	SKIVE	male	Musc	M.musculus					0.476923076923077				34	1
14dec17_18nov17_WSB_f3_sp1_3_rev	88	3.2836	0.037135	10	14dec17_18nov17_WSB_f3_sp1_3_rev_10	1	0			1	42					18nov17_WSB_f3	WSB female	WSB	female	Dom	M.musculus					0.477272727272727				46	0
12dec17_18nov17_WSB_f2_sp1_15_rev	90	4.7287	0.052319	12	12dec17_18nov17_WSB_f2_sp1_15_rev_12	1	0			1	43					18nov17_WSB_f2	WSB female	WSB	female	Dom	M.musculus					0.477777777777778				47	0
7mar15_1mar15_PWD_m1_sp4_20_rev	46	5.462	0.11909	6	7mar15_1mar15_PWD_m1_sp4_20_rev_6	1	0			1	22					1mar15_PWD_m1	PWD male	PWD	male	Musc	M.musculus					0.478260869565217				24	1
9apr18_1feb18_LEW_f1_sp1_9_rev	140	3.6066	0.025781	5	9apr18_1feb18_LEW_f1_sp1_9_rev_5	1	0			1	67					1feb18_LEW_f1	LEW female	LEW	female	Dom	M.musculus					0.478571428571429				73	0
2jul17_20dec16_LEW_m2_sp1_16_rev	94	5.3084	0.056392	9	2jul17_20dec16_LEW_m2_sp1_16_rev_9	1	0			1	45					20dec16_LEW_m2	LEW male	LEW	male	Dom	M.musculus					0.478723404255319				49	0
24may17_17mar16_G_f5_sp1_4_rev	71	5.395	0.076286	17	24may17_17mar16_G_f5_sp1_4_rev_17	1	0			1	34					17mar16_G_f5	G female	G	female	Dom	M.musculus					0.47887323943662				37	0
7feb18_11jan18_KAZ_m4_sp1_5_rev	119	6.7948	0.056885	4	7feb18_11jan18_KAZ_m4_sp1_5_rev_4	1	0			1	57					11jan18_KAZ_m4	KAZ male	KAZ	male	Musc	M.musculus					0.478991596638655				62	0
8feb17_4jan17_LEW_f1_sp1_4_rev	121	3.6878	0.030463	12	8feb17_4jan17_LEW_f1_sp1_4_rev_12	1	0			1	58					4jan17_LEW_f1	LEW female	LEW	female	Dom	M.musculus					0.479338842975207				63	0
11jan19_27oct18_SKIVE_m1_sp1_23.1_rev	75	5.1352	0.068523	6	11jan19_27oct18_SKIVE_m1_sp1_23.1_rev_6	1	0			1	36					27oct18_SKIVE_m1	SKIVE male	SKIVE	male	Musc	M.musculus					0.48				39	1
5aug17_14jul17_MSM_f1_sp1_13_rev	102	7.1261	0.069533	1	5aug17_14jul17_MSM_f1_sp1_13_rev_1	1	0			1	49					14jul17_MSM_f1	MSM female	MSM	female	Mol	M.musculus					0.480392156862745				53	0
27jul19_26oct18_SKIVE_f2_sp1_25_rev	104	3.4761	0.033305	13	27jul19_26oct18_SKIVE_f2_sp1_25_rev_13	1	0			1	50					26oct18_SKIVE_f2	SKIVE female	SKIVE	female	Musc	M.musculus					0.4807692307692308				54	0
2jul17_20dec16_LEW_m3_sp1_12_rev	104	6.2469	0.060281	6	2jul17_20dec16_LEW_m3_sp1_12_rev_6	1	0			1	50					20dec16_LEW_m3	LEW male	LEW	male	Dom	M.musculus					0.480769230769231				54	0
11jan19_27oct18_SKIVE_m1_sp1_12.1_rev	52	4.7868	0.091994	9	11jan19_27oct18_SKIVE_m1_sp1_12.1_rev_9	1	0			1	25					27oct18_SKIVE_m1	SKIVE male	SKIVE	male	Musc	M.musculus					0.480769230769231				27	1
26dec17_18nov17_WSB_f4_sp1_26_rev	79	3.1884	0.040172	10	26dec17_18nov17_WSB_f4_sp1_26_rev_10	1	0			1	38					18nov17_WSB_f4	WSB female	WSB	female	Dom	M.musculus					0.481012658227848				41	0
10jun15_18may15_WSB_m1_sp1_24_rev	79	3.2353	0.040738	8	10jun15_18may15_WSB_m1_sp1_24_rev_8	1	0			1	38					18may15_WSB_m1	WSB male	WSB	male	Dom	M.musculus					0.481012658227848				41	0
14mar16_16jan16_G_f1_sp1_1_rev	106	2.4704	0.02325	7	14mar16_16jan16_G_f1_sp1_1_rev_7	1	0			1	51				some faint foci	16jan16_G_f1	G female	G	female	Dom	M.musculus					0.481132075471698				55	0
4jun19_28sep18_MOLF_m1_sp1_31_rev	54	3.3846	0.062331	10	4jun19_28sep18_MOLF_m1_sp1_31_rev_10	1	0			1	26					28sep18_MOLF_m1	MOLF male	MOLF	male	Mol	M.musculus					0.481481481481481				28	0
10jun19_31may19_SKIVE_f6_sp1_41_rev	108	4.9877	0.046135	2	10jun19_31may19_SKIVE_f6_sp1_41_rev_2	1	0			1	52					31may19_SKIVE_f6	SKIVE female	SKIVE	female	Musc	M.musculus					0.481481481481481				56	0
26dec17_18nov17_WSB_f4_sp1_17_rev	54	6.1394	0.11303	10	26dec17_18nov17_WSB_f4_sp1_17_rev_10	1	0			1	26					18nov17_WSB_f4	WSB female	WSB	female	Dom	M.musculus					0.481481481481481				28	0
30jun17_4jan17_LEW_f3_sp1_8_rev	137	5.3448	0.038943	8	30jun17_4jan17_LEW_f3_sp1_8_rev_8	1	0			1	66					4jan17_LEW_f3	LEW female	LEW	female	Dom	M.musculus					0.481751824817518				71	0
12dec17_18nov17_WSB_f2_sp1_15_rev	83	2.4561	0.029444	13	12dec17_18nov17_WSB_f2_sp1_15_rev_13	1	0			1	40					18nov17_WSB_f2	WSB female	WSB	female	Dom	M.musculus					0.481927710843373				43	0
12dec17_18nov17_WSB_f2_sp1_22_rev	83	1.875	0.022604	13	12dec17_18nov17_WSB_f2_sp1_22_rev_13	1	0			1	40					18nov17_WSB_f2	WSB female	WSB	female	Dom	M.musculus					0.481927710843373				43	0
27jul19_26oct18_SKIVE_f1_sp1_11_rev	83	3.4246	0.041111	20	27jul19_26oct18_SKIVE_f1_sp1_11_rev_20	1	0			1	40					26oct18_SKIVE_f1	SKIVE female	SKIVE	female	Musc	M.musculus					0.4819277108433735				43	0
8jun15_23apr15_PWD_f2_sp1_15_rev	112	5.2504	0.046813	5	8jun15_23apr15_PWD_f2_sp1_15_rev_5	1	0			1	54					23apr15_PWD_f2	PWD female	PWD	female	Musc	M.musculus					0.482142857142857				58	0
16feb18_1feb18_KAZ_f4_sp1_4_rev	145	3.8866	0.026851	9	16feb18_1feb18_KAZ_f4_sp1_4_rev_9	1	0			1	70					1feb18_KAZ_f4	KAZ female	KAZ	female	Musc	M.musculus					0.482758620689655				75	0
6mar18_1feb18_LEW_m1_sp1_7_rev	58	4.1582	0.071327	14	6mar18_1feb18_LEW_m1_sp1_7_rev_14	1	0			1	28					1feb18_LEW_m1	LEW male	LEW	male	Dom	M.musculus					0.482758620689655				30	0
29nov16_13nov16_MSM_m2_sp1_23_rev	87	2.7273	0.031379	8	29nov16_13nov16_MSM_m2_sp1_23_rev_8	1	0			1	42					13nov16_MSM_m2	MSM male	MSM	male	Mol	M.musculus					0.482758620689655				45	1
13sep18_28jun18_MOLF_m1_sp1_26_rev	60	6.1648	0.10255	5	13sep18_28jun18_MOLF_m1_sp1_26_rev_5	1	0			1	29					28jun18_MOLF_m1	MOLF male	MOLF	male	Mol	M.musculus					0.483333333333333				31	0
12dec17_18nov17_WSB_f2_sp1_8_rev	180	3.7776	0.020985	15	12dec17_18nov17_WSB_f2_sp1_8_rev_15	1	0			1	87					18nov17_WSB_f2	WSB female	WSB	female	Dom	M.musculus					0.483333333333333				93	0
14dec17_18nov17_WSB_f3_sp1_34_rev	60	2.6471	0.043777	26	14dec17_18nov17_WSB_f3_sp1_34_rev_26	1	0			1	29					18nov17_WSB_f3	WSB female	WSB	female	Dom	M.musculus					0.483333333333333				31	0
24may17_17mar16_G_f5_sp1_8_rev	91	4.0076	0.043818	11	24may17_17mar16_G_f5_sp1_8_rev_11	1	0			1	44					17mar16_G_f5	G female	G	female	Dom	M.musculus					0.483516483516484				47	0
2jul17_20dec16_LEW_m3_sp1_12_rev	93	3.7143	0.039931	7	2jul17_20dec16_LEW_m3_sp1_12_rev_7	1	0			1	45					20dec16_LEW_m3	LEW male	LEW	male	Dom	M.musculus					0.483870967741935				48	0
12dec17_18nov17_WSB_f2_sp1_8_rev	93	2.6667	0.028814	9	12dec17_18nov17_WSB_f2_sp1_8_rev_9	1	0			1	45					18nov17_WSB_f2	WSB female	WSB	female	Dom	M.musculus					0.483870967741935				48	0
27jul19_26oct18_SKIVE_f2_sp1_38_rev	157	2.3529	0.014979	1	27jul19_26oct18_SKIVE_f2_sp1_38_rev_1	1	0			1	76					26oct18_SKIVE_f2	SKIVE female	SKIVE	female	Musc	M.musculus					0.4840764331210191				81	0
7mar15_1mar15_PWD_m1_sp4_23_rev	95	5.9777	0.06268	16	7mar15_1mar15_PWD_m1_sp4_23_rev_16	1	0			1	46					1mar15_PWD_m1	PWD male	PWD	male	Musc	M.musculus					0.484210526315789				49	1
14dec17_18nov17_WSB_f3_sp1_14_rev	64	3.4921	0.054976	4	14dec17_18nov17_WSB_f3_sp1_14_rev_4	1	0			1	31					18nov17_WSB_f3	WSB female	WSB	female	Dom	M.musculus					0.484375				33	0
26dec17_18nov17_WSB_f4_sp1_1_rev	64	3.6111	0.056152	5	26dec17_18nov17_WSB_f4_sp1_1_rev_5	1	0			1	31					18nov17_WSB_f4	WSB female	WSB	female	Dom	M.musculus					0.484375				33	0
8feb18_1feb18_KAZ_f1_sp1_19_rev	66	3.1455	0.047705	2	8feb18_1feb18_KAZ_f1_sp1_19_rev_2	1	0			1	32					1feb18_KAZ_f1	KAZ female	KAZ	female	Musc	M.musculus					0.484848484848485				34	0
5jun18_21may18_KAZ_m2_sp1_21_rev	66	2.9644	0.045254	15	5jun18_21may18_KAZ_m2_sp1_21_rev_15	1	0			1	32					21may18_KAZ_m2	KAZ male	KAZ	male	Musc	M.musculus					0.484848484848485				34	0
19jan17_4jan17_LEW_f6_sp1_45_rev	66	4.4837	0.06835	23	19jan17_4jan17_LEW_f6_sp1_45_rev_23	1	0			1	32					4jan17_LEW_f6	LEW female	LEW	female	Dom	M.musculus					0.484848484848485				34	0
2aug19_28sep18_MOLF_m2_sp1_9_rev	68	5.947	0.087055	6	2aug19_28sep18_MOLF_m2_sp1_9_rev_6	1	0			1	33					28sep18_MOLF_m2	MOLF male	MOLF	male	Mol	M.musculus					0.485294117647059				35	0
7mar15_1mar15_PWD_m1_sp4_20_rev	68	4.1845	0.061979	18	7mar15_1mar15_PWD_m1_sp4_20_rev_18	1	0			1	33					1mar15_PWD_m1	PWD male	PWD	male	Musc	M.musculus					0.485294117647059				35	1
20may15_17apr15_PWD_f4_sp1_9_rev	105	3.0649	0.029127	4	20may15_17apr15_PWD_f4_sp1_9_rev_4	1	0			1	51					17apr15_PWD_f4	PWD female	PWD	female	Musc	M.musculus					0.485714285714286				54	0
19jan17_4jan17_LEW_f7_sp1_9_rev	144	3.887	0.027043	12	19jan17_4jan17_LEW_f7_sp1_9_rev_12	1	0			1	70					4jan17_LEW_f7	LEW female	LEW	female	Dom	M.musculus					0.486111111111111				74	0
20aug15_22jun15_G_m1_sp2_15.2_rev	74	10.3696	0.14021	9	20aug15_22jun15_G_m1_sp2_15.2_rev_9	1	0			1	36					22jun15_G_m1	G male	G	male	Dom	M.musculus					0.486486486486487				38	0
15mar17_13jan17_LEW_f3_sp1_12_rev	74	7.0313	0.095629	19	15mar17_13jan17_LEW_f3_sp1_12_rev_19	1	0			1	36					13jan17_LEW_f3	LEW female	LEW	female	Dom	M.musculus					0.486486486486487				38	0
9aug15_23apr15_PWD_f2_sp1_5_rev	111	1.9355	0.017511	7	9aug15_23apr15_PWD_f2_sp1_5_rev_7	1	0			1	54					23apr15_PWD_f2	PWD female	PWD	female	Musc	M.musculus					0.486486486486487				57	0
11dec17_18nov17_WSB_f1_sp1_8_rev	113	1.8182	0.016108	7	11dec17_18nov17_WSB_f1_sp1_8_rev_7	1	0			1	55					18nov17_WSB_f1	WSB female	WSB	female	Dom	M.musculus					0.486725663716814				58	0
16feb18_1feb18_KAZ_f4_sp1_25_rev	117	6.2025	0.052853	14	16feb18_1feb18_KAZ_f4_sp1_25_rev_14	1	0			1	57					1feb18_KAZ_f4	KAZ female	KAZ	female	Musc	M.musculus					0.487179487179487				60	0
27aug15_12jun15_WSB_m2_sp1_13.1_rev	78	2.0896	0.026836	11	27aug15_12jun15_WSB_m2_sp1_13.1_rev_11	1	0			1	38					12jun15_WSB_m2	WSB male	WSB	male	Dom	M.musculus					0.487179487179487				40	0
10jun19_31may19_SKIVE_f6_sp1_41_rev	119	4.986	0.042	19	10jun19_31may19_SKIVE_f6_sp1_41_rev_19	1	0			1	58					31may19_SKIVE_f6	SKIVE female	SKIVE	female	Musc	M.musculus					0.487394957983193				61	0
12may15_30sep14_G_m5_sp1_19_rev	82	6.3925	0.07825	20	12may15_30sep14_G_m5_sp1_19_rev_20	1	0			1	40					30sep14_G_m5	G male	G	male	Dom	M.musculus					0.48780487804878				42	0
15mar16_16jan16_G_f1_sp1_5_rev	82	3.5305	0.043302	15	15mar16_16jan16_G_f1_sp1_5_rev_15	1	0			1	40					16jan16_G_f1	G female	G	female	Dom	M.musculus					0.48780487804878				42	0
17nov16_17mar16_G_f1_sp1_14_rev	123	5.0964	0.041294	18	17nov16_17mar16_G_f1_sp1_14_rev_18	1	0			1	60					17mar16_G_f1	G female	G	female	Dom	M.musculus					0.48780487804878				63	0
29nov16_13nov16_MSM_m2_sp1_8_rev	86	2.9851	0.03469	2	29nov16_13nov16_MSM_m2_sp1_8_rev_2	1	0			1	42					13nov16_MSM_m2	MSM male	MSM	male	Mol	M.musculus					0.488372093023256				44	1
6mar18_1feb18_LEW_m1_sp1_16_rev	88	3.6364	0.041334	1	6mar18_1feb18_LEW_m1_sp1_16_rev_1	1	0			1	43					1feb18_LEW_m1	LEW male	LEW	male	Dom	M.musculus					0.488636363636364				45	0
19oct15_12oct15_G_m1_sp1_10_rev	90	4.2819	0.047327	13	19oct15_12oct15_G_m1_sp1_10_rev_13	1	0			1	44					12oct15_G_m1	G male	G	male	Dom	M.musculus					0.488888888888889				46	0
15mar17_13jan17_LEW_f3_sp1_15_rev	135	2.3881	0.017684	1	15mar17_13jan17_LEW_f3_sp1_15_rev_1	1	0			1	66					13jan17_LEW_f3	LEW female	LEW	female	Dom	M.musculus					0.488888888888889				69	0
30jun17_4jan17_LEW_f3_sp1_10_rev	143	5.1982	0.036309	16	30jun17_4jan17_LEW_f3_sp1_10_rev_16	1	0			1	70					4jan17_LEW_f3	LEW female	LEW	female	Dom	M.musculus					0.48951048951049				73	0
26jan18_11jan18_KAZ_m3_sp1_22_rev	98	5.6026	0.056901	3	26jan18_11jan18_KAZ_m3_sp1_22_rev_3	1	0			1	48					11jan18_KAZ_m3	KAZ male	KAZ	male	Musc	M.musculus					0.489795918367347				50	0
8jun15_23apr15_PWD_f2_sp1_20_rev	98	7.2745	0.074201	8	8jun15_23apr15_PWD_f2_sp1_20_rev_8	1	0			1	48					23apr15_PWD_f2	PWD female	PWD	female	Musc	M.musculus					0.489795918367347				50	0
8feb18_1feb18_KAZ_f1_sp1_11_rev	104	7.1598	0.068698	16	8feb18_1feb18_KAZ_f1_sp1_11_rev_16	1	0			1	51					1feb18_KAZ_f1	KAZ female	KAZ	female	Musc	M.musculus					0.490384615384615				53	0
7feb18_11jan18_KAZ_m4_sp1_7_rev	53	5.3322	0.10064	8	7feb18_11jan18_KAZ_m4_sp1_7_rev_8	1	0			1	26					11jan18_KAZ_m4	KAZ male	KAZ	male	Musc	M.musculus					0.490566037735849				27	0
5aug17_14jul17_MSM_f1_sp1_6_rev	159	3.7124	0.023311	6	5aug17_14jul17_MSM_f1_sp1_6_rev_6	1	0			1	78					14jul17_MSM_f1	MSM female	MSM	female	Mol	M.musculus					0.490566037735849				81	0
20jul15_18may15_PWD_m1_sp1_15_rev	53	6.5879	0.12502	16	20jul15_18may15_PWD_m1_sp1_15_rev_16	1	0			1	26					18may15_PWD_m1	PWD male	PWD	male	Musc	M.musculus					0.490566037735849				27	1
5jun18_21may18_KAZ_m2_sp1_10.2_rev	61	2.2581	0.036783	15	5jun18_21may18_KAZ_m2_sp1_10.2_rev_15	1	0			1	30					21may18_KAZ_m2	KAZ male	KAZ	male	Musc	M.musculus					0.491803278688525				31	0
8feb18_1feb18_KAZ_f1_sp1_20_rev	126	5.4401	0.043155	19	8feb18_1feb18_KAZ_f1_sp1_20_rev_19	1	0			1	62					1feb18_KAZ_f1	KAZ female	KAZ	female	Musc	M.musculus					0.492063492063492				64	0
19jan17_4jan17_LEW_f6_sp1_18_rev	67	2.3881	0.035551	19	19jan17_4jan17_LEW_f6_sp1_18_rev_19	1	0			1	33					4jan17_LEW_f6	LEW female	LEW	female	Dom	M.musculus					0.492537313432836				34	0
19jan17_4jan17_LEW_f7_sp1_3_rev	69	3.5941	0.052111	16	19jan17_4jan17_LEW_f7_sp1_3_rev_16	1	0			1	34					4jan17_LEW_f7	LEW female	LEW	female	Dom	M.musculus					0.492753623188406				35	0
19may15_31mar15_WSB_m1_sp1_4_rev	69	2.9032	0.041897	4	19may15_31mar15_WSB_m1_sp1_4_rev_4	1	0			1	34					31mar15_WSB_m1	WSB male	WSB	male	Dom	M.musculus					0.492753623188406				35	0
27mar16_6mar16_G_m2_sp1_8.2_rev	71	3.7884	0.053673	18	27mar16_6mar16_G_m2_sp1_8.2_rev_18	1	0			1	35					6mar16_G_m2	G male	G	male	Dom	M.musculus					0.492957746478873				36	0
26dec17_18nov17_WSB_f4_sp1_26_rev	71	3.8838	0.054373	17	26dec17_18nov17_WSB_f4_sp1_26_rev_17	1	0			1	35					18nov17_WSB_f4	WSB female	WSB	female	Dom	M.musculus					0.492957746478873				36	0
2jul17_20dec16_LEW_m3_sp1_20_rev	79	7.565	0.095635	14	2jul17_20dec16_LEW_m3_sp1_20_rev_14	1	0			1	39					20dec16_LEW_m3	LEW male	LEW	male	Dom	M.musculus					0.493670886075949				40	0
12dec17_18nov17_WSB_f2_sp1_16_rev	79	4.4367	0.055832	4	12dec17_18nov17_WSB_f2_sp1_16_rev_4	1	0			1	39					18nov17_WSB_f2	WSB female	WSB	female	Dom	M.musculus					0.493670886075949				40	0
9aug15_17apr15_PWD_f2_sp1_8_rev	83	4.2792	0.051357	9	9aug15_17apr15_PWD_f2_sp1_8_rev_9	1	0			1	41				faint final foci	17apr15_PWD_f2	PWD female	PWD	female	Musc	M.musculus					0.493975903614458				42	0
12dec17_18nov17_WSB_f2_sp1_4_rev	83	1.2698	0.015262	20	12dec17_18nov17_WSB_f2_sp1_4_rev_20	1	0			1	41					18nov17_WSB_f2	WSB female	WSB	female	Dom	M.musculus					0.493975903614458				42	0
27jul19_26oct18_SKIVE_f1_sp1_25_rev	85	11.3595	0.13317	3	27jul19_26oct18_SKIVE_f1_sp1_25_rev_3	1	0			1	42					26oct18_SKIVE_f1	SKIVE female	SKIVE	female	Musc	M.musculus					0.49411764705882355				43	0
11dec17_18nov17_WSB_f1_sp1_25_rev	89	3.5821	0.040152	11	11dec17_18nov17_WSB_f1_sp1_25_rev_11	1	0			1	44					18nov17_WSB_f1	WSB female	WSB	female	Dom	M.musculus					0.49438202247191				45	0
19jan17_4jan17_LEW_f6_sp1_24_rev	93	3.1534	0.033755	11	19jan17_4jan17_LEW_f6_sp1_24_rev_11	1	0			1	46					4jan17_LEW_f6	LEW female	LEW	female	Dom	M.musculus					0.494623655913978				47	0
9aug15_23apr15_PWD_f2_sp1_9.1_rev	97	10.6485	0.10952	12	9aug15_23apr15_PWD_f2_sp1_9.1_rev_12	1	0			1	48					23apr15_PWD_f2	PWD female	PWD	female	Musc	M.musculus					0.494845360824742				49	0
16feb18_1feb18_KAZ_f4_sp1_4_rev	99	4.6712	0.046987	2	16feb18_1feb18_KAZ_f4_sp1_4_rev_2	1	0			1	49					1feb18_KAZ_f4	KAZ female	KAZ	female	Musc	M.musculus					0.494949494949495				50	0
27jul19_26oct18_SKIVE_f2_sp1_25_rev	107	3.7288	0.034968	19	27jul19_26oct18_SKIVE_f2_sp1_25_rev_19	1	0			1	53					26oct18_SKIVE_f2	SKIVE female	SKIVE	female	Musc	M.musculus					0.4953271028037383				54	0
10jun19_31may19_SKIVE_f6_sp1_10_rev	111	3.0769	0.027838	17	10jun19_31may19_SKIVE_f6_sp1_10_rev_17	1	0			1	55					31may19_SKIVE_f6	SKIVE female	SKIVE	female	Musc	M.musculus					0.495495495495495				56	0
17nov16_17mar16_G_f1_sp1_14_rev	115	5.4057	0.046879	1	17nov16_17mar16_G_f1_sp1_14_rev_1	1	0			1	57				1 faint foci	17mar16_G_f1	G female	G	female	Dom	M.musculus					0.495652173913044				58	0
27jul19_26oct18_SKIVE_f1_sp1_11_rev	119	3.5821	0.030056	15	27jul19_26oct18_SKIVE_f1_sp1_11_rev_15	1	0			1	59					26oct18_SKIVE_f1	SKIVE female	SKIVE	female	Musc	M.musculus					0.4957983193277311				60	0
6jun18_13jan17_LEW_f2_sp1_1_rev	123	2.8125	0.022813	3	6jun18_13jan17_LEW_f2_sp1_1_rev_3	1	0			1	61					13jan17_LEW_f2	LEW female	LEW	female	Dom	M.musculus					0.495934959349593				62	0
16feb16_17mar16_G_f4_sp1_1_rev	129	5.2775	0.04103	1	16feb16_17mar16_G_f4_sp1_1_rev_1	1	0			1	64					17mar16_G_f4	G female	G	female	Dom	M.musculus					0.496124031007752				65	0
12oct18_26sep18_CZECH_m1_sp1_18_rev	66	4.3684	0.065968	12	12oct18_26sep18_CZECH_m1_sp1_18_rev_12	1	0			1	33					26sep18_CZECH_m1	CZECH male	CZECH	male	Musc	M.musculus					0.5				33	0
23jul19_28sep18_CZECH_m2_sp1_15.1_rev	60	8.0049	0.13427	18	23jul19_28sep18_CZECH_m2_sp1_15.1_rev_18	1	0			1	30					28sep18_CZECH_m2	CZECH male	CZECH	male	Musc	M.musculus					0.5				30	0
16nov16_17mar16_G_f5_sp1_9_rev	128	0.57971	0.0045263	15	16nov16_17mar16_G_f5_sp1_9_rev_15	1	0			1	64					17mar16_G_f5	G female	G	female	Dom	M.musculus					0.5				64	0
17nov16_17mar16_G_f1_sp1_14_rev	132	7.2952	0.055162	2	17nov16_17mar16_G_f1_sp1_14_rev_2	1	0			1	66					17mar16_G_f1	G female	G	female	Dom	M.musculus					0.5				66	0
19oct15_12oct15_G_m1_sp1_7_rev	114	5.0432	0.044233	5	19oct15_12oct15_G_m1_sp1_7_rev_5	1	0			1	57					12oct15_G_m1	G male	G	male	Dom	M.musculus					0.5				57	0
27mar16_6mar16_G_m3_sp1_15.1_rev	96	2.9851	0.031161	7	27mar16_6mar16_G_m3_sp1_15.1_rev_7	1	0			1	48					6mar16_G_m3	G male	G	male	Dom	M.musculus					0.5				48	0
27mar16_6mar16_G_m3_sp1_15.2_rev	104	3.8356	0.036862	8	27mar16_6mar16_G_m3_sp1_15.2_rev_8	1	0			1	52				2 faint flanking foci	6mar16_G_m3	G male	G	male	Dom	M.musculus					0.5				52	0
9mar16_22feb16_G_m1_sp1_2_rev	66	4.5464	0.069097	4	9mar16_22feb16_G_m1_sp1_2_rev_4	1	0			1	33					22feb16_G_m1	G male	G	male	Dom	M.musculus					0.5				33	0
8feb18_1feb18_KAZ_f1_sp1_17_rev	140	10.0998	0.07223	5	8feb18_1feb18_KAZ_f1_sp1_17_rev_5	1	0			1	70					1feb18_KAZ_f1	KAZ female	KAZ	female	Musc	M.musculus					0.5				70	0
19jan17_4jan17_LEW_f7_sp1_6_rev	70	0.86957	0.01235	2	19jan17_4jan17_LEW_f7_sp1_6_rev_2	1	0			1	35					4jan17_LEW_f7	LEW female	LEW	female	Dom	M.musculus					0.5				35	0
19jan17_4jan17_LEW_f7_sp1_7_rev	76	7.2668	0.095031	11	19jan17_4jan17_LEW_f7_sp1_7_rev_11	1	0			1	38					4jan17_LEW_f7	LEW female	LEW	female	Dom	M.musculus					0.5				38	0
2jul17_20dec16_LEW_m3_sp1_20_rev	68	2.3881	0.035038	8	2jul17_20dec16_LEW_m3_sp1_20_rev_8	1	0			1	34					20dec16_LEW_m3	LEW male	LEW	male	Dom	M.musculus					0.5				34	0
29nov17_16nov17_MSM_f1_sp1_11_rev	56	5.1109	0.091797	7	29nov17_16nov17_MSM_f1_sp1_11_rev_7	1	0			1	28					16nov17_MSM_f1	MSM female	MSM	female	Mol	M.musculus					0.5				28	0
4dec17_16nov17_MSM_f2_sp1_18_rev	114	4.4687	0.039158	18	4dec17_16nov17_MSM_f2_sp1_18_rev_18	1	0			1	57					16nov17_MSM_f2	MSM female	MSM	female	Mol	M.musculus					0.5				57	0
5aug17_14jul17_MSM_f1_sp1_20_rev	68	8.1139	0.12005	11	5aug17_14jul17_MSM_f1_sp1_20_rev_11	1	0			1	34					14jul17_MSM_f1	MSM female	MSM	female	Mol	M.musculus					0.5				34	0
8jun15_23apr15_PWD_f2_sp1_15_rev	78	9.1989	0.11814	10	8jun15_23apr15_PWD_f2_sp1_15_rev_10	1	0			1	39					23apr15_PWD_f2	PWD female	PWD	female	Musc	M.musculus					0.5				39	0
10jun19_31may19_SKIVE_f6_sp1_25_rev	100	7.2671	0.072945	9	10jun19_31may19_SKIVE_f6_sp1_25_rev_9	1	0			1	50					31may19_SKIVE_f6	SKIVE female	SKIVE	female	Musc	M.musculus					0.5				50	0
11jan19_27oct18_SKIVE_m1_sp1_28_rev	90	0.59701	0.0066599	14	11jan19_27oct18_SKIVE_m1_sp1_28_rev_14	1	0			1	45					27oct18_SKIVE_m1	SKIVE male	SKIVE	male	Musc	M.musculus					0.5				45	1
18sep19_19aug19_SKIVE_m3_sp1_20.1_rev	56	0.28571	0.0051271	22	18sep19_19aug19_SKIVE_m3_sp1_20.1_rev_22	1	0			1	28					19aug19_SKIVE_m3	SKIVE male	SKIVE	male	Musc	M.musculus					0.5				28	1
11dec17_18nov17_WSB_f1_sp1_22_rev	102	5.7208	0.055908	1	11dec17_18nov17_WSB_f1_sp1_22_rev_1	1	0			1	51					18nov17_WSB_f1	WSB female	WSB	female	Dom	M.musculus					0.5				51	0
11dec17_18nov17_WSB_f1_sp1_25_rev	98	2.4138	0.024734	17	11dec17_18nov17_WSB_f1_sp1_25_rev_17	1	0			1	49					18nov17_WSB_f1	WSB female	WSB	female	Dom	M.musculus					0.5				49	0
11dec17_18nov17_WSB_f1_sp1_7_rev	112	6.3218	0.05663	1	11dec17_18nov17_WSB_f1_sp1_7_rev_1	1	0			1	56					18nov17_WSB_f1	WSB female	WSB	female	Dom	M.musculus					0.5				56	0
12dec17_18nov17_WSB_f2_sp1_16_rev	36	4.5055	0.12416	10	12dec17_18nov17_WSB_f2_sp1_16_rev_10	1	0			1	18					18nov17_WSB_f2	WSB female	WSB	female	Dom	M.musculus					0.5				18	0
12dec17_18nov17_WSB_f2_sp1_2_rev	40	3.5362	0.087461	22	12dec17_18nov17_WSB_f2_sp1_2_rev_22	1	0			1	20					18nov17_WSB_f2	WSB female	WSB	female	Dom	M.musculus					0.5				20	0
12dec17_18nov17_WSB_f2_sp1_20_rev	106	4.9909	0.046933	19	12dec17_18nov17_WSB_f2_sp1_20_rev_19	1	0			1	53					18nov17_WSB_f2	WSB female	WSB	female	Dom	M.musculus					0.5				53	0
12dec17_18nov17_WSB_f2_sp1_7_rev	76	3.7255	0.049235	5	12dec17_18nov17_WSB_f2_sp1_7_rev_5	1	0			1	38					18nov17_WSB_f2	WSB female	WSB	female	Dom	M.musculus					0.5				38	0
14dec17_18nov17_WSB_f3_sp1_10_rev	90	5.2292	0.058385	10	14dec17_18nov17_WSB_f3_sp1_10_rev_10	1	0			1	45					18nov17_WSB_f3	WSB female	WSB	female	Dom	M.musculus					0.5				45	0
14dec17_18nov17_WSB_f3_sp1_14_rev	44	2.5397	0.057374	10	14dec17_18nov17_WSB_f3_sp1_14_rev_10	1	0			1	22					18nov17_WSB_f3	WSB female	WSB	female	Dom	M.musculus					0.5				22	0
26dec17_18nov17_WSB_f4_sp1_27_rev	52	4.9658	0.096226	7	26dec17_18nov17_WSB_f4_sp1_27_rev_7	1	0			1	26					18nov17_WSB_f4	WSB female	WSB	female	Dom	M.musculus					0.5				26	0
10jun15_18may15_WSB_m1_sp1_24_rev	74	5.2331	0.070422	4	10jun15_18may15_WSB_m1_sp1_24_rev_4	1	0			1	37					18may15_WSB_m1	WSB male	WSB	male	Dom	M.musculus					0.5				37	0
12jul15_12jun15_WSB_m1_sp1_4.2_rev	52	3.422	0.065643	8	12jul15_12jun15_WSB_m1_sp1_4.2_rev_8	1	0			1	26					12jun15_WSB_m1	WSB male	WSB	male	Dom	M.musculus					0.5				26	0
27aug15_12jun15_WSB_m2_sp1_9.2_rev	38	3.236	0.085334	15	27aug15_12jun15_WSB_m2_sp1_9.2_rev_15	1	0			1	19					12jun15_WSB_m2	WSB male	WSB	male	Dom	M.musculus					0.5				19	0
27jul19_26oct18_SKIVE_f2_sp1_25_rev	96	4.73	0.049528	20	27jul19_26oct18_SKIVE_f2_sp1_25_rev_20	1	0			1	48					26oct18_SKIVE_f2	SKIVE female	SKIVE	female	Musc	M.musculus					0.5				48	0
20may15_17apr15_PWD_f4_sp1_20_rev	147	9.9408	0.067503	3	20may15_17apr15_PWD_f4_sp1_20_rev_3	1	0			1	74					17apr15_PWD_f4	PWD female	PWD	female	Musc	M.musculus					0.503401360544218				73	0
7mar15_1mar15_PWD_m1_sp4_1.1_rev	135	3.3381	0.024735	11	7mar15_1mar15_PWD_m1_sp4_1.1_rev_11	1	0			1	68				faint flanking foci	1mar15_PWD_m1	PWD male	PWD	male	Musc	M.musculus					0.503703703703704				67	1
8jun15_23apr15_PWD_f2_sp1_2_rev	133	7.8535	0.0589	15	8jun15_23apr15_PWD_f2_sp1_2_rev_15	1	0			1	67					23apr15_PWD_f2	PWD female	PWD	female	Musc	M.musculus					0.503759398496241				66	0
16nov16_17mar16_G_f5_sp1_8_rev	127	5.7558	0.045462	5	16nov16_17mar16_G_f5_sp1_8_rev_5	1	0			1	64					17mar16_G_f5	G female	G	female	Dom	M.musculus					0.503937007874016				63	0
23jul19_28sep18_CZECH_m2_sp1_16.1_rev	117	2.8169	0.023991	4	23jul19_28sep18_CZECH_m2_sp1_16.1_rev_4	1	0			1	59					28sep18_CZECH_m2	CZECH male	CZECH	male	Musc	M.musculus					0.504273504273504				58	0
17nov16_17mar16_G_f1_sp1_9_rev	115	8.9803	0.078204	17	17nov16_17mar16_G_f1_sp1_9_rev_17	1	0			1	58					17mar16_G_f1	G female	G	female	Dom	M.musculus					0.504347826086956				57	0
4dec17_16nov17_MSM_f2_sp1_18_rev	113	4.3807	0.038652	15	4dec17_16nov17_MSM_f2_sp1_18_rev_15	1	0			1	57					16nov17_MSM_f2	MSM female	MSM	female	Mol	M.musculus					0.504424778761062				56	0
27jul19_26oct18_SKIVE_f1_sp1_22_rev	113	4.1839	0.037182	12	27jul19_26oct18_SKIVE_f1_sp1_22_rev_12	1	0			1	57					26oct18_SKIVE_f1	SKIVE female	SKIVE	female	Musc	M.musculus					0.504424778761062				56	0
17nov16_17mar16_G_f1_sp1_8_rev	111	9.9222	0.089606	18	17nov16_17mar16_G_f1_sp1_8_rev_18	1	0			1	56					17mar16_G_f1	G female	G	female	Dom	M.musculus					0.504504504504504				55	0
15mar17_13jan17_LEW_f3_sp1_33_rev	111	4.0427	0.036482	1	15mar17_13jan17_LEW_f3_sp1_33_rev_1	1	0			1	56					13jan17_LEW_f3	LEW female	LEW	female	Dom	M.musculus					0.504504504504504				55	0
12jul15_12jun15_WSB_m1_sp1_7.1_rev	107	4.5708	0.042835	4	12jul15_12jun15_WSB_m1_sp1_7.1_rev_4	1	0			1	54				faint flanking foci	12jun15_WSB_m1	WSB male	WSB	male	Dom	M.musculus					0.504672897196262				53	0
8feb18_1feb18_KAZ_f1_sp1_10_rev	105	3.8436	0.036522	11	8feb18_1feb18_KAZ_f1_sp1_10_rev_11	1	0			1	53					1feb18_KAZ_f1	KAZ female	KAZ	female	Musc	M.musculus					0.504761904761905				52	0
21nov17_16nov17_MSM_f3_sp1_10_rev	101	5.4476	0.054027	2	21nov17_16nov17_MSM_f3_sp1_10_rev_2	1	0			1	51					16nov17_MSM_f3	MSM female	MSM	female	Mol	M.musculus					0.504950495049505				50	0
11dec17_18nov17_WSB_f1_sp1_23_rev	101	3.3153	0.032976	13	11dec17_18nov17_WSB_f1_sp1_23_rev_13	1	0			1	51					18nov17_WSB_f1	WSB female	WSB	female	Dom	M.musculus					0.504950495049505				50	0
15mar17_13jan17_LEW_f3_sp1_12_rev	99	4.7426	0.047795	7	15mar17_13jan17_LEW_f3_sp1_12_rev_7	1	0			1	50					13jan17_LEW_f3	LEW female	LEW	female	Dom	M.musculus					0.505050505050505				49	0
27jul19_26oct18_SKIVE_f2_sp1_38_rev	95	7.947	0.083781	21	27jul19_26oct18_SKIVE_f2_sp1_38_rev_21	1	0			1	48					26oct18_SKIVE_f2	SKIVE female	SKIVE	female	Musc	M.musculus					0.5052631578947369				47	0
8feb18_1feb18_KAZ_f1_sp1_20_rev	91	5.791	0.06361	2	8feb18_1feb18_KAZ_f1_sp1_20_rev_2	1	0			1	46					1feb18_KAZ_f1	KAZ female	KAZ	female	Musc	M.musculus					0.505494505494505				45	0
26jan18_11jan18_KAZ_m3_sp1_18_rev	89	3.6696	0.041232	9	26jan18_11jan18_KAZ_m3_sp1_18_rev_9	1	0			1	45					11jan18_KAZ_m3	KAZ male	KAZ	male	Musc	M.musculus					0.50561797752809				44	0
2aug19_28sep18_MOLF_m2_sp1_16_rev	87	4.7128	0.053935	1	2aug19_28sep18_MOLF_m2_sp1_16_rev_1	1	0			1	44					28sep18_MOLF_m2	MOLF male	MOLF	male	Mol	M.musculus					0.505747126436782				43	0
7mar15_1mar15_PWD_m1_sp4_12_rev	83	6.8204	0.082398	16	7mar15_1mar15_PWD_m1_sp4_12_rev_16	1	0			1	42					1mar15_PWD_m1	PWD male	PWD	male	Musc	M.musculus					0.506024096385542				41	1
6mar15_1mar15_PWD_m1_sp4_8_rev	79	7.5611	0.096281	1	6mar15_1mar15_PWD_m1_sp4_8_rev_1	1	0			1	40					1mar15_PWD_m1	PWD male	PWD	male	Musc	M.musculus					0.506329113924051				39	1
27mar16_6mar16_G_m1_sp1_8_rev	77	3.2774	0.042819	5	27mar16_6mar16_G_m1_sp1_8_rev_5	1	0			1	39					6mar16_G_m1	G male	G	male	Dom	M.musculus					0.506493506493506				38	0
14dec17_18nov17_WSB_f3_sp1_20_rev	77	2.4242	0.031601	14	14dec17_18nov17_WSB_f3_sp1_20_rev_14	1	0			1	39					18nov17_WSB_f3	WSB female	WSB	female	Dom	M.musculus					0.506493506493506				38	0
12may15_30sep14_G_m5_sp1_9_rev	75	4.6475	0.06235	9	12may15_30sep14_G_m5_sp1_9_rev_9	1	0			1	38					30sep14_G_m5	G male	G	male	Dom	M.musculus					0.506666666666667				37	0
7feb18_11jan18_KAZ_m4_sp1_4_rev	73	6.1486	0.084588	2	7feb18_11jan18_KAZ_m4_sp1_4_rev_2	1	0			1	37					11jan18_KAZ_m4	KAZ male	KAZ	male	Musc	M.musculus					0.506849315068493				36	0
20may15_17apr15_PWD_f4_sp1_23_rev	73	4.5636	0.062532	18	20may15_17apr15_PWD_f4_sp1_23_rev_18	1	0			1	37					17apr15_PWD_f4	PWD female	PWD	female	Musc	M.musculus					0.506849315068493				36	0
20jul15_18may15_PWD_m1_sp1_30_rev	73	6.7224	0.092092	6	20jul15_18may15_PWD_m1_sp1_30_rev_6	1	0			1	37					18may15_PWD_m1	PWD male	PWD	male	Musc	M.musculus					0.506849315068493				36	1
10jan18_13jan17_LEW_f1_sp1_14_rev	71	9.4158	0.13248	5	10jan18_13jan17_LEW_f1_sp1_14_rev_5	1	0			1	36					13jan17_LEW_f1	LEW female	LEW	female	Dom	M.musculus					0.507042253521127				35	0
4dec17_16nov17_MSM_f2_sp1_34_rev	136	8.6647	0.063792	1	4dec17_16nov17_MSM_f2_sp1_34_rev_1	1	0			1	69					16nov17_MSM_f2	MSM female	MSM	female	Mol	M.musculus					0.507352941176471				67	0
9aug15_17apr15_PWD_f2_sp1_8_rev	128	7.2095	0.056199	20	9aug15_17apr15_PWD_f2_sp1_8_rev_20	1	0			1	65					17apr15_PWD_f2	PWD female	PWD	female	Musc	M.musculus					0.5078125				63	0
15mar16_16jan16_G_f1_sp1_5_rev	63	4.2426	0.066836	21	15mar16_16jan16_G_f1_sp1_5_rev_21	1	0			1	32					16jan16_G_f1	G female	G	female	Dom	M.musculus					0.507936507936508				31	0
24may17_17mar16_G_f5_sp1_8_rev	63	5.0506	0.080244	3	24may17_17mar16_G_f5_sp1_8_rev_3	1	0			1	32					17mar16_G_f5	G female	G	female	Dom	M.musculus					0.507936507936508				31	0
10jun15_24mar15_G_m1_sp1_13_rev	61	4.975	0.082066	3	10jun15_24mar15_G_m1_sp1_13_rev_3	1	0			1	31					24mar15_G_m1	G male	G	male	Dom	M.musculus					0.508196721311475				30	0
6jun18_13jan17_LEW_f2_sp1_10_rev	120	6.6217	0.055391	16	6jun18_13jan17_LEW_f2_sp1_10_rev_16	1	0			1	61					13jan17_LEW_f2	LEW female	LEW	female	Dom	M.musculus					0.508333333333333				59	0
12dec17_18nov17_WSB_f2_sp1_17_rev	120	8.3896	0.069892	22	12dec17_18nov17_WSB_f2_sp1_17_rev_22	1	0			1	61					18nov17_WSB_f2	WSB female	WSB	female	Dom	M.musculus					0.508333333333333				59	0
7mar15_1mar15_PWD_m1_sp4_16_rev	57	5.4449	0.095207	3	7mar15_1mar15_PWD_m1_sp4_16_rev_3	1	0			1	29					1mar15_PWD_m1	PWD male	PWD	male	Musc	M.musculus					0.508771929824561				28	1
8feb17_20dec16_LEW_m1_sp1_32.1_rev	55	4.7145	0.085419	12	8feb17_20dec16_LEW_m1_sp1_32.1_rev_12	1	0			1	28					20dec16_LEW_m1	LEW male	LEW	male	Dom	M.musculus					0.509090909090909				27	0
20jul15_18may15_PWD_m1_sp1_22_rev	108	6.6277	0.061597	5	20jul15_18may15_PWD_m1_sp1_22_rev_5	1	0			1	55					18may15_PWD_m1	PWD male	PWD	male	Musc	M.musculus					0.509259259259259				53	1
8feb18_1feb18_KAZ_f1_sp1_22_rev	106	4.8203	0.045575	4	8feb18_1feb18_KAZ_f1_sp1_22_rev_4	1	0			1	54					1feb18_KAZ_f1	KAZ female	KAZ	female	Musc	M.musculus					0.509433962264151				52	0
2aug19_28sep18_MOLF_m2_sp1_14.1_rev	53	3.5821	0.067739	11	2aug19_28sep18_MOLF_m2_sp1_14.1_rev_11	1	0			1	27					28sep18_MOLF_m2	MOLF male	MOLF	male	Mol	M.musculus					0.509433962264151				26	0
4dec17_16nov17_MSM_f2_sp1_18_rev	106	6.0299	0.05679	3	4dec17_16nov17_MSM_f2_sp1_18_rev_3	1	0			1	54					16nov17_MSM_f2	MSM female	MSM	female	Mol	M.musculus					0.509433962264151				52	0
17mar15_10mar15_PWD_m1_sp1_8_rev	53	4.9711	0.094308	15	17mar15_10mar15_PWD_m1_sp1_8_rev_15	1	0			1	27					10mar15_PWD_m1	PWD male	PWD	male	Musc	M.musculus					0.509433962264151				26	1
7feb18_11jan18_KAZ_m4_sp1_16.1_rev	104	1.7241	0.01664	6	7feb18_11jan18_KAZ_m4_sp1_16.1_rev_6	1	0			1	53					11jan18_KAZ_m4	KAZ male	KAZ	male	Musc	M.musculus					0.509615384615385				51	0
24may17_17mar16_G_f5_sp1_11_rev	102	2.2857	0.022351	6	24may17_17mar16_G_f5_sp1_11_rev_6	1	0			1	52					17mar16_G_f5	G female	G	female	Dom	M.musculus					0.509803921568627				50	0
5aug17_14jul17_MSM_f1_sp1_17_rev	102	5.0384	0.049606	3	5aug17_14jul17_MSM_f1_sp1_17_rev_3	1	0			1	52					14jul17_MSM_f1	MSM female	MSM	female	Mol	M.musculus					0.509803921568627				50	0
1mar18_1feb18_KAZ_f3_sp1_11_rev	100	5.0148	0.050036	8	1mar18_1feb18_KAZ_f3_sp1_11_rev_8	1	0			1	51					1feb18_KAZ_f3	KAZ female	KAZ	female	Musc	M.musculus					0.51				49	0
18jul19_31may19_SKIVE_m2_sp1_24_rev	49	4.2073	0.086254	14	18jul19_31may19_SKIVE_m2_sp1_24_rev_14	1	0			1	25					31may19_SKIVE_m2	SKIVE male	SKIVE	male	Musc	M.musculus					0.510204081632653				24	1
11dec17_18nov17_WSB_f1_sp1_5_rev	96	7.1472	0.074481	16	11dec17_18nov17_WSB_f1_sp1_5_rev_16	1	0			1	49					18nov17_WSB_f1	WSB female	WSB	female	Dom	M.musculus					0.510416666666667				47	0
13mar15_28feb15_PWD_f2_sp1_48.2_rev	92	4.9502	0.053807	2	13mar15_28feb15_PWD_f2_sp1_48.2_rev_2	1	0			1	47					28feb15_PWD_f2	PWD female	PWD	female	Musc	M.musculus					0.510869565217391				45	0
15mar16_16jan16_G_f1_sp1_5_rev	84	7.019	0.083581	14	15mar16_16jan16_G_f1_sp1_5_rev_14	1	0			1	43					16jan16_G_f1	G female	G	female	Dom	M.musculus					0.511904761904762				41	0
22jul19_26oct18_SKIVE_f3_sp1_12.2_rev	82	3.9394	0.047883	21	22jul19_26oct18_SKIVE_f3_sp1_12.2_rev_21	1	0			1	42					26oct18_SKIVE_f3	SKIVE female	SKIVE	female	Musc	M.musculus					0.5121951219512195				40	0
1mar16_20feb16_G_f3_sp1_17_rev	121	7.9629	0.065666	17	1mar16_20feb16_G_f3_sp1_17_rev_17	1	0			1	62					20feb16_G_f3	G female	G	female	Dom	M.musculus					0.512396694214876				59	0
13sep18_28jun18_MOLF_m1_sp1_5.1_rev	78	4.8467	0.062353	2	13sep18_28jun18_MOLF_m1_sp1_5.1_rev_2	1	0			1	40					28jun18_MOLF_m1	MOLF male	MOLF	male	Mol	M.musculus					0.512820512820513				38	0
17feb15_13oct14_G_f2_sp1_16_rev	76	8.6154	0.11342	11	17feb15_13oct14_G_f2_sp1_16_rev_11	1	0			1	39					13oct14_G_f2	G female	G	female	Dom	M.musculus					0.513157894736842				37	0
8feb18_1feb18_KAZ_f1_sp1_19_rev	76	2.1212	0.02785	9	8feb18_1feb18_KAZ_f1_sp1_19_rev_9	1	0			1	39					1feb18_KAZ_f1	KAZ female	KAZ	female	Musc	M.musculus					0.513157894736842				37	0
7feb18_11jan18_KAZ_m4_sp1_18.1_rev	76	4.0403	0.053039	14	7feb18_11jan18_KAZ_m4_sp1_18.1_rev_14	1	0			1	39					11jan18_KAZ_m4	KAZ male	KAZ	male	Musc	M.musculus					0.513157894736842				37	0
9aug15_17apr15_PWD_f2_sp1_7_rev	148	4.7889	0.032341	14	9aug15_17apr15_PWD_f2_sp1_7_rev_14	1	0			1	76					17apr15_PWD_f2	PWD female	PWD	female	Musc	M.musculus					0.513513513513513				72	0
9aug15_17apr15_PWD_f2_sp1_3.2_rev	109	3.6405	0.033414	22	9aug15_17apr15_PWD_f2_sp1_3.2_rev_22	1	0			1	56					17apr15_PWD_f2	PWD female	PWD	female	Musc	M.musculus					0.513761467889908				53	0
14dec17_18nov17_WSB_f3_sp1_29_rev	109	3.5484	0.032443	5	14dec17_18nov17_WSB_f3_sp1_29_rev_5	1	0			1	56					18nov17_WSB_f3	WSB female	WSB	female	Dom	M.musculus					0.513761467889908				53	0
5aug17_14jul17_MSM_f1_sp1_11_rev	105	6.3704	0.060803	10	5aug17_14jul17_MSM_f1_sp1_11_rev_10	1	0			1	54					14jul17_MSM_f1	MSM female	MSM	female	Mol	M.musculus					0.514285714285714				51	0
14dec17_18nov17_WSB_f3_sp1_12_rev	70	3.5821	0.051489	4	14dec17_18nov17_WSB_f3_sp1_12_rev_4	1	0			1	36					18nov17_WSB_f3	WSB female	WSB	female	Dom	M.musculus					0.514285714285714				34	0
26dec17_18nov17_WSB_f4_sp1_34_rev	173	3.87	0.022323	3	26dec17_18nov17_WSB_f4_sp1_34_rev_3	1	0			1	89					18nov17_WSB_f4	WSB female	WSB	female	Dom	M.musculus					0.514450867052023				84	0
12dec17_18nov17_WSB_f2_sp1_5_rev	103	6.62	0.064024	14	12dec17_18nov17_WSB_f2_sp1_5_rev_14	1	0			1	53					18nov17_WSB_f2	WSB female	WSB	female	Dom	M.musculus					0.514563106796116				50	0
7feb18_11jan18_KAZ_m4_sp1_11_rev	68	11.8359	0.17502	18	7feb18_11jan18_KAZ_m4_sp1_11_rev_18	1	0			1	35					11jan18_KAZ_m4	KAZ male	KAZ	male	Musc	M.musculus					0.514705882352941				33	0
27aug15_12jun15_WSB_m2_sp1_19_rev	68	6.1035	0.089115	8	27aug15_12jun15_WSB_m2_sp1_19_rev_8	1	0			1	35					12jun15_WSB_m2	WSB male	WSB	male	Dom	M.musculus					0.514705882352941				33	0
13sep18_28jun18_MOLF_m1_sp1_11_rev	97	5.1949	0.053319	9	13sep18_28jun18_MOLF_m1_sp1_11_rev_9	1	0			1	50					28jun18_MOLF_m1	MOLF male	MOLF	male	Mol	M.musculus					0.515463917525773				47	0
14mar16_16jan16_G_f1_sp1_1_rev	128	7.1963	0.056108	11	14mar16_16jan16_G_f1_sp1_1_rev_11	1	0			1	66					16jan16_G_f1	G female	G	female	Dom	M.musculus					0.515625				62	0
9mar16_22feb16_G_m1_sp1_7_rev	128	1.5385	0.012053	10	9mar16_22feb16_G_m1_sp1_7_rev_10	1	0			1	66					22feb16_G_m1	G male	G	male	Dom	M.musculus					0.515625				62	0
27jul19_26oct18_SKIVE_f2_sp1_13_rev	95	2.3529	0.024792	24	27jul19_26oct18_SKIVE_f2_sp1_13_rev_24	1	0			1	49					26oct18_SKIVE_f2	SKIVE female	SKIVE	female	Musc	M.musculus					0.5157894736842106				46	0
16nov16_17mar16_G_f5_sp1_1_rev	95	4.9486	0.051998	7	16nov16_17mar16_G_f5_sp1_1_rev_7	1	0			1	49					17mar16_G_f5	G female	G	female	Dom	M.musculus					0.515789473684211				46	0
5aug17_14jul17_MSM_f1_sp1_26_rev	126	4.4604	0.035297	8	5aug17_14jul17_MSM_f1_sp1_26_rev_8	1	0			1	65					14jul17_MSM_f1	MSM female	MSM	female	Mol	M.musculus					0.515873015873016				61	0
12may15_30sep14_G_m5_sp1_11_rev	62	6.7413	0.10895	13	12may15_30sep14_G_m5_sp1_11_rev_13	1	0			1	32					30sep14_G_m5	G male	G	male	Dom	M.musculus					0.516129032258065				30	0
26jan18_11jan18_KAZ_m3_sp1_21_rev	93	6.9037	0.07417	14	26jan18_11jan18_KAZ_m3_sp1_21_rev_14	1	0			1	48					11jan18_KAZ_m3	KAZ male	KAZ	male	Musc	M.musculus					0.516129032258065				45	0
3mar15_13jan17_LEW_m1_sp1_24.2_rev	62	4.0914	0.06645	12	3mar15_13jan17_LEW_m1_sp1_24.2_rev_12	1	0			1	32					13jan17_LEW_m1	LEW male	LEW	male	Dom	M.musculus					0.516129032258065				30	0
19jan17_4jan17_LEW_f6_sp1_18_rev	89	2.5352	0.028349	2	19jan17_4jan17_LEW_f6_sp1_18_rev_2	1	0			1	46					4jan17_LEW_f6	LEW female	LEW	female	Dom	M.musculus					0.51685393258427				43	0
12dec17_18nov17_WSB_f2_sp1_22_rev	89	5.2209	0.058798	11	12dec17_18nov17_WSB_f2_sp1_22_rev_11	1	0			1	46					18nov17_WSB_f2	WSB female	WSB	female	Dom	M.musculus					0.51685393258427				43	0
26dec17_18nov17_WSB_f4_sp1_1_rev	89	2.9508	0.032996	16	26dec17_18nov17_WSB_f4_sp1_1_rev_16	1	0			1	46					18nov17_WSB_f4	WSB female	WSB	female	Dom	M.musculus					0.51685393258427				43	0
11dec17_18nov17_WSB_f1_sp1_21_rev	85	3.7105	0.043823	12	11dec17_18nov17_WSB_f1_sp1_21_rev_12	1	0			1	44					18nov17_WSB_f1	WSB female	WSB	female	Dom	M.musculus					0.517647058823529				41	0
12dec17_18nov17_WSB_f2_sp1_23_rev	85	2.8571	0.033765	4	12dec17_18nov17_WSB_f2_sp1_23_rev_4	1	0			1	44					18nov17_WSB_f2	WSB female	WSB	female	Dom	M.musculus					0.517647058823529				41	0
7mar15_1mar15_PWD_m1_sp4_19_rev	83	4.7209	0.057074	14	7mar15_1mar15_PWD_m1_sp4_19_rev_14	1	0			1	43					1mar15_PWD_m1	PWD male	PWD	male	Musc	M.musculus					0.518072289156627				40	1
2apr15_28feb15_PWD_f3_sp1_7_rev	81	5.3221	0.065462	16	2apr15_28feb15_PWD_f3_sp1_7_rev_16	1	0			1	42					28feb15_PWD_f3	PWD female	PWD	female	Musc	M.musculus					0.518518518518518				39	0
22mar15_10mar15_PWD_m1_sp1_5.1_rev	54	4.9441	0.091739	5	22mar15_10mar15_PWD_m1_sp1_5.1_rev_5	1	0			1	28					10mar15_PWD_m1	PWD male	PWD	male	Musc	M.musculus					0.518518518518518				26	1
10jun15_18may15_WSB_m1_sp1_22_rev	108	6.3932	0.059161	16	10jun15_18may15_WSB_m1_sp1_22_rev_16	1	0			1	56					18may15_WSB_m1	WSB male	WSB	male	Dom	M.musculus					0.518518518518518				52	0
27mar16_6mar16_G_m3_sp1_11.2_rev	79	2.9851	0.037699	9	27mar16_6mar16_G_m3_sp1_11.2_rev_9	1	0			1	41					6mar16_G_m3	G male	G	male	Dom	M.musculus					0.518987341772152				38	0
2jul17_20dec16_LEW_m2_sp1_11_rev	104	3.8842	0.037525	6	2jul17_20dec16_LEW_m2_sp1_11_rev_6	1	0			1	54					20dec16_LEW_m2	LEW male	LEW	male	Dom	M.musculus					0.519230769230769				50	0
19jan17_4jan17_LEW_f6_sp1_2_rev	77	4.4117	0.057514	3	19jan17_4jan17_LEW_f6_sp1_2_rev_3	1	0			1	40					4jan17_LEW_f6	LEW female	LEW	female	Dom	M.musculus					0.519480519480519				37	0
2aug15_8oct14_PWD_f4_sp1_10.1_rev	77	9.5004	0.12379	18	2aug15_8oct14_PWD_f4_sp1_10.1_rev_18	1	0			1	40					8oct14_PWD_f4	PWD female	PWD	female	Musc	M.musculus					0.519480519480519				37	0
11dec17_18nov17_WSB_f1_sp1_14_rev	77	1.1594	0.015023	7	11dec17_18nov17_WSB_f1_sp1_14_rev_7	1	0			1	40					18nov17_WSB_f1	WSB female	WSB	female	Dom	M.musculus					0.519480519480519				37	0
26jan18_11jan18_KAZ_m3_sp1_4_rev	102	5.7412	0.056147	6	26jan18_11jan18_KAZ_m3_sp1_4_rev_6	1	0			1	53					11jan18_KAZ_m3	KAZ male	KAZ	male	Musc	M.musculus					0.519607843137255				49	0
7feb18_11jan18_KAZ_m4_sp1_14_rev	98	5.0048	0.051317	3	7feb18_11jan18_KAZ_m4_sp1_14_rev_3	1	0			1	51					11jan18_KAZ_m4	KAZ male	KAZ	male	Musc	M.musculus					0.520408163265306				47	0
2jul17_20dec16_LEW_m2_sp1_4_rev	73	6.0397	0.082837	15	2jul17_20dec16_LEW_m2_sp1_4_rev_15	1	0			1	38					20dec16_LEW_m2	LEW male	LEW	male	Dom	M.musculus					0.520547945205479				35	0
11dec17_18nov17_WSB_f1_sp1_23_rev	146	1.1594	0.0079211	1	11dec17_18nov17_WSB_f1_sp1_23_rev_1	1	0			1	76					18nov17_WSB_f1	WSB female	WSB	female	Dom	M.musculus					0.520547945205479				70	0
26dec17_18nov17_WSB_f4_sp1_26_rev	94	5.0241	0.053712	9	26dec17_18nov17_WSB_f4_sp1_26_rev_9	1	0			1	49					18nov17_WSB_f4	WSB female	WSB	female	Dom	M.musculus					0.521276595744681				45	0
26dec17_18nov17_WSB_f4_sp1_18_rev	117	6.144	0.052568	15	26dec17_18nov17_WSB_f4_sp1_18_rev_15	1	0			1	61					18nov17_WSB_f4	WSB female	WSB	female	Dom	M.musculus					0.521367521367521				56	0
16nov16_17mar16_G_f5_sp1_1_rev	115	5.488	0.047595	19	16nov16_17mar16_G_f5_sp1_1_rev_19	1	0			1	60					17mar16_G_f5	G female	G	female	Dom	M.musculus					0.521739130434783				55	0
15mar17_13jan17_LEW_f3_sp1_9_rev	92	2.4615	0.026758	11	15mar17_13jan17_LEW_f3_sp1_9_rev_11	1	0			1	48					13jan17_LEW_f3	LEW female	LEW	female	Dom	M.musculus					0.521739130434783				44	0
20may15_17apr15_PWD_f4_sp1_5_rev	88	5.6297	0.064025	24	20may15_17apr15_PWD_f4_sp1_5_rev_24	1	0			1	46					17apr15_PWD_f4	PWD female	PWD	female	Musc	M.musculus					0.522727272727273				42	0
12dec17_18nov17_WSB_f2_sp1_23_rev	65	1.9355	0.029994	10	12dec17_18nov17_WSB_f2_sp1_23_rev_10	1	0			1	34					18nov17_WSB_f2	WSB female	WSB	female	Dom	M.musculus					0.523076923076923				31	0
8feb18_1feb18_KAZ_f1_sp1_4_rev	84	5.1947	0.062011	11	8feb18_1feb18_KAZ_f1_sp1_4_rev_11	1	0			1	44					1feb18_KAZ_f1	KAZ female	KAZ	female	Musc	M.musculus					0.523809523809524				40	0
30jun17_4jan17_LEW_f3_sp1_12_rev	105	3.3171	0.031673	3	30jun17_4jan17_LEW_f3_sp1_12_rev_3	1	0			1	55					4jan17_LEW_f3	LEW female	LEW	female	Dom	M.musculus					0.523809523809524				50	0
3mar15_13jan17_LEW_m1_sp1_4_rev	82	4.1176	0.050057	3	3mar15_13jan17_LEW_m1_sp1_4_rev_3	1	0			1	43					13jan17_LEW_m1	LEW male	LEW	male	Dom	M.musculus					0.524390243902439				39	0
21nov17_16nov17_MSM_f3_sp1_9_rev	82	3.8461	0.0468	6	21nov17_16nov17_MSM_f3_sp1_9_rev_6	1	0			1	43					16nov17_MSM_f3	MSM female	MSM	female	Mol	M.musculus					0.524390243902439				39	0
5jun18_21may18_KAZ_m2_sp1_12_rev	61	4.0781	0.06695	9	5jun18_21may18_KAZ_m2_sp1_12_rev_9	1	0			1	32					21may18_KAZ_m2	KAZ male	KAZ	male	Musc	M.musculus					0.524590163934426				29	0
6mar18_1feb18_LEW_m1_sp1_7_rev	61	1.4706	0.024278	7	6mar18_1feb18_LEW_m1_sp1_7_rev_7	1	0			1	32					1feb18_LEW_m1	LEW male	LEW	male	Dom	M.musculus					0.524590163934426				29	0
27jul19_26oct18_SKIVE_f1_sp1_12_rev	101	5.2415	0.051824	21	27jul19_26oct18_SKIVE_f1_sp1_12_rev_21	1	0			1	53				second faint foci	26oct18_SKIVE_f1	SKIVE female	SKIVE	female	Musc	M.musculus					0.5247524752475248				48	0
19jan17_4jan17_LEW_f6_sp1_12_rev	80	3.2353	0.040627	23	19jan17_4jan17_LEW_f6_sp1_12_rev_23	1	0			1	42					4jan17_LEW_f6	LEW female	LEW	female	Dom	M.musculus					0.525				38	0
11jan19_27oct18_SKIVE_m1_sp1_23.2_rev	80	4.1022	0.051159	3	11jan19_27oct18_SKIVE_m1_sp1_23.2_rev_3	1	0			1	42					27oct18_SKIVE_m1	SKIVE male	SKIVE	male	Musc	M.musculus					0.525				38	1
11dec17_18nov17_WSB_f1_sp1_3_rev	80	4.0371	0.0503	12	11dec17_18nov17_WSB_f1_sp1_3_rev_12	1	0			1	42					18nov17_WSB_f1	WSB female	WSB	female	Dom	M.musculus					0.525				38	0
12dec17_18nov17_WSB_f2_sp1_24_rev	80	2.2951	0.028704	16	12dec17_18nov17_WSB_f2_sp1_24_rev_16	1	0			1	42					18nov17_WSB_f2	WSB female	WSB	female	Dom	M.musculus					0.525				38	0
27mar16_6mar16_G_m3_sp1_8_rev	99	4.9092	0.049366	12	27mar16_6mar16_G_m3_sp1_8_rev_12	1	0			1	52					6mar16_G_m3	G male	G	male	Dom	M.musculus					0.525252525252525				47	0
11dec17_18nov17_WSB_f1_sp1_8_rev	99	4.521	0.045829	12	11dec17_18nov17_WSB_f1_sp1_8_rev_12	1	0			1	52					18nov17_WSB_f1	WSB female	WSB	female	Dom	M.musculus					0.525252525252525				47	0
13sep18_28jun18_MOLF_m1_sp1_18.1_rev	78	4.8851	0.062537	12	13sep18_28jun18_MOLF_m1_sp1_18.1_rev_12	1	0			1	41					28jun18_MOLF_m1	MOLF male	MOLF	male	Mol	M.musculus					0.525641025641026				37	0
12may15_30sep14_G_m5_sp1_22_rev	95	4.7433	0.050042	2	12may15_30sep14_G_m5_sp1_22_rev_2	1	0			1	50					30sep14_G_m5	G male	G	male	Dom	M.musculus					0.526315789473684				45	0
16nov16_17mar16_G_f5_sp1_1_rev	95	5.1581	0.054573	18	16nov16_17mar16_G_f5_sp1_1_rev_18	1	0			1	50					17mar16_G_f5	G female	G	female	Dom	M.musculus					0.526315789473684				45	0
6jun18_13jan17_LEW_f2_sp1_10_rev	114	6.4489	0.056741	3	6jun18_13jan17_LEW_f2_sp1_10_rev_3	1	0			1	60					13jan17_LEW_f2	LEW female	LEW	female	Dom	M.musculus					0.526315789473684				54	0
20jul15_18may15_PWD_m1_sp1_30_rev	95	6.0367	0.063289	8	20jul15_18may15_PWD_m1_sp1_30_rev_8	1	0			1	50					18may15_PWD_m1	PWD male	PWD	male	Musc	M.musculus					0.526315789473684				45	1
5jan19_27oct18_SKIVE_m2_sp1_10_rev	57	2.8169	0.049088	12	5jan19_27oct18_SKIVE_m2_sp1_10_rev_12	1	0			1	30					27oct18_SKIVE_m2	SKIVE male	SKIVE	male	Musc	M.musculus					0.526315789473684				27	1
8feb17_4jan17_LEW_f1_sp1_5_rev	131	7.9256	0.060272	7	8feb17_4jan17_LEW_f1_sp1_5_rev_7	1	0			1	69					4jan17_LEW_f1	LEW female	LEW	female	Dom	M.musculus					0.526717557251908				62	0
19jan17_4jan17_LEW_f7_sp1_4_rev	93	4.2693	0.046022	7	19jan17_4jan17_LEW_f7_sp1_4_rev_7	1	0			1	49					4jan17_LEW_f7	LEW female	LEW	female	Dom	M.musculus					0.526881720430108				44	0
12dec17_18nov17_WSB_f2_sp1_9_rev	93	2.623	0.028095	20	12dec17_18nov17_WSB_f2_sp1_9_rev_20	1	0			1	49					18nov17_WSB_f2	WSB female	WSB	female	Dom	M.musculus					0.526881720430108				44	0
13sep18_28jun18_MOLF_m1_sp1_20_rev	74	2.6471	0.035767	10	13sep18_28jun18_MOLF_m1_sp1_20_rev_10	1	0			1	39					28jun18_MOLF_m1	MOLF male	MOLF	male	Mol	M.musculus					0.527027027027027				35	0
29nov17_16nov17_MSM_f1_sp1_28_rev	74	5.1995	0.070519	12	29nov17_16nov17_MSM_f1_sp1_28_rev_12	1	0			1	39					16nov17_MSM_f1	MSM female	MSM	female	Mol	M.musculus					0.527027027027027				35	0
7mar15_1mar15_PWD_m1_sp4_1.2_rev	55	5.7757	0.10596	3	7mar15_1mar15_PWD_m1_sp4_1.2_rev_3	1	0			1	29					1mar15_PWD_m1	PWD male	PWD	male	Musc	M.musculus					0.527272727272727				26	1
11jan19_27oct18_SKIVE_m1_sp1_25_rev	110	2.0896	0.019005	5	11jan19_27oct18_SKIVE_m1_sp1_25_rev_5	1	0			1	58					27oct18_SKIVE_m1	SKIVE male	SKIVE	male	Musc	M.musculus					0.527272727272727				52	1
5jun18_21may18_KAZ_m2_sp1_14_rev	91	3.8467	0.042466	2	5jun18_21may18_KAZ_m2_sp1_14_rev_2	1	0			1	48					21may18_KAZ_m2	KAZ male	KAZ	male	Musc	M.musculus					0.527472527472527				43	0
10jun15_24mar15_G_m1_sp1_25_rev	108	3.6598	0.034001	9	10jun15_24mar15_G_m1_sp1_25_rev_9	1	0			1	57					24mar15_G_m1	G male	G	male	Dom	M.musculus					0.527777777777778				51	0
6mar18_1feb18_LEW_m1_sp1_17_rev	72	7.2832	0.1011	2	6mar18_1feb18_LEW_m1_sp1_17_rev_2	1	0			1	38					1feb18_LEW_m1	LEW male	LEW	male	Dom	M.musculus					0.527777777777778				34	0
8feb17_20dec16_LEW_m1_sp1_24.1_rev	72	2.0896	0.029105	11	8feb17_20dec16_LEW_m1_sp1_24.1_rev_11	1	0			1	38					20dec16_LEW_m1	LEW male	LEW	male	Dom	M.musculus					0.527777777777778				34	0
8jun15_23apr15_PWD_f2_sp1_14_rev	161	4.2736	0.026506	11	8jun15_23apr15_PWD_f2_sp1_14_rev_11	1	0			1	85					23apr15_PWD_f2	PWD female	PWD	female	Musc	M.musculus					0.527950310559006				76	0
6jun18_13jan17_LEW_f2_sp1_1_rev	89	2.1538	0.024072	11	6jun18_13jan17_LEW_f2_sp1_1_rev_11	1	0			1	47					13jan17_LEW_f2	LEW female	LEW	female	Dom	M.musculus					0.528089887640449				42	0
6mar15_1mar15_PWD_m1_sp4_2_rev	53	2.3881	0.044639	5	6mar15_1mar15_PWD_m1_sp4_2_rev_5	1	0			1	28					1mar15_PWD_m1	PWD male	PWD	male	Musc	M.musculus					0.528301886792453				25	1
13sep18_28jun18_MOLF_m1_sp1_26_rev	87	5.2579	0.060614	20	13sep18_28jun18_MOLF_m1_sp1_26_rev_20	1	0			1	46					28jun18_MOLF_m1	MOLF male	MOLF	male	Mol	M.musculus					0.528735632183908				41	0
14dec17_18nov17_WSB_f3_sp1_28_rev	121	3.8885	0.032085	15	14dec17_18nov17_WSB_f3_sp1_28_rev_15	1	0			1	64					18nov17_WSB_f3	WSB female	WSB	female	Dom	M.musculus					0.528925619834711				57	0
17feb15_13oct14_G_f2_sp1_15_rev	51	5.5043	0.10857	9	17feb15_13oct14_G_f2_sp1_15_rev_9	1	0			1	27					13oct14_G_f2	G female	G	female	Dom	M.musculus					0.529411764705882				24	0
7feb18_11jan18_KAZ_m4_sp1_22_rev	102	5.5458	0.054224	2	7feb18_11jan18_KAZ_m4_sp1_22_rev_2	1	0			1	54					11jan18_KAZ_m4	KAZ male	KAZ	male	Musc	M.musculus					0.529411764705882				48	0
6jun18_13jan17_LEW_f2_sp1_16_rev	119	6.4962	0.054752	1	6jun18_13jan17_LEW_f2_sp1_16_rev_1	1	0			1	63					13jan17_LEW_f2	LEW female	LEW	female	Dom	M.musculus					0.529411764705882				56	0
6mar18_1feb18_LEW_m1_sp1_17_rev	102	6.3213	0.061893	4	6mar18_1feb18_LEW_m1_sp1_17_rev_4	1	0			1	54					1feb18_LEW_m1	LEW male	LEW	male	Dom	M.musculus					0.529411764705882				48	0
21nov17_16nov17_MSM_f3_sp1_10_rev	51	4.0422	0.078741	11	21nov17_16nov17_MSM_f3_sp1_10_rev_11	1	0			1	27					16nov17_MSM_f3	MSM female	MSM	female	Mol	M.musculus					0.529411764705882				24	0
14dec17_18nov17_WSB_f3_sp1_10_rev	85	4.063	0.047712	14	14dec17_18nov17_WSB_f3_sp1_10_rev_14	1	0			1	45					18nov17_WSB_f3	WSB female	WSB	female	Dom	M.musculus					0.529411764705882				40	0
2apr15_28feb15_PWD_f3_sp1_2_rev	134	8.6722	0.064859	8	2apr15_28feb15_PWD_f3_sp1_2_rev_8	1	0			1	71					28feb15_PWD_f3	PWD female	PWD	female	Musc	M.musculus					0.529850746268657				63	0
6mar18_1feb18_LEW_m1_sp1_1_rev	83	5.1763	0.062684	4	6mar18_1feb18_LEW_m1_sp1_1_rev_4	1	0			1	44					1feb18_LEW_m1	LEW male	LEW	male	Dom	M.musculus					0.530120481927711				39	0
12dec17_18nov17_WSB_f2_sp1_18_rev	83	2.9851	0.035794	10	12dec17_18nov17_WSB_f2_sp1_18_rev_10	1	0			1	44					18nov17_WSB_f2	WSB female	WSB	female	Dom	M.musculus					0.530120481927711				39	0
10jun15_18may15_WSB_m1_sp1_21_rev	83	4.2786	0.051751	5	10jun15_18may15_WSB_m1_sp1_21_rev_5	1	0			1	44					18may15_WSB_m1	WSB male	WSB	male	Dom	M.musculus					0.530120481927711				39	0
9aug15_17apr15_PWD_f2_sp1_3.1_rev	66	5.1898	0.078403	3	9aug15_17apr15_PWD_f2_sp1_3.1_rev_3	1	0			1	35					17apr15_PWD_f2	PWD female	PWD	female	Musc	M.musculus					0.53030303030303				31	0
2jul17_20dec16_LEW_m3_sp1_15_rev	49	4.4144	0.089967	5	2jul17_20dec16_LEW_m3_sp1_15_rev_5	1	0			1	26					20dec16_LEW_m3	LEW male	LEW	male	Dom	M.musculus					0.530612244897959				23	0
14dec17_18nov17_WSB_f3_sp1_26_rev	49	4.2432	0.087156	3	14dec17_18nov17_WSB_f3_sp1_26_rev_3	1	0			1	26					18nov17_WSB_f3	WSB female	WSB	female	Dom	M.musculus					0.530612244897959				23	0
10jun15_18may15_WSB_m1_sp1_4_rev	49	6.085	0.12525	5	10jun15_18may15_WSB_m1_sp1_4_rev_5	1	0			1	26					18may15_WSB_m1	WSB male	WSB	male	Dom	M.musculus					0.530612244897959				23	0
9aug15_17apr15_PWD_f2_sp1_19_rev	113	6.8873	0.061067	14	9aug15_17apr15_PWD_f2_sp1_19_rev_14	1	0			1	60					17apr15_PWD_f2	PWD female	PWD	female	Musc	M.musculus					0.530973451327434				53	0
15mar17_13jan17_LEW_f3_sp1_7_rev	96	1.4085	0.014614	5	15mar17_13jan17_LEW_f3_sp1_7_rev_5	1	0			1	51					13jan17_LEW_f3	LEW female	LEW	female	Dom	M.musculus					0.53125				45	0
2jul17_20dec16_LEW_m3_sp1_21_rev	79	4.2226	0.053498	9	2jul17_20dec16_LEW_m3_sp1_21_rev_9	1	0			1	42					20dec16_LEW_m3	LEW male	LEW	male	Dom	M.musculus					0.531645569620253				37	0
20may15_17apr15_PWD_f4_sp1_25_rev	79	5.1663	0.065615	3	20may15_17apr15_PWD_f4_sp1_25_rev_3	1	0			1	42					17apr15_PWD_f4	PWD female	PWD	female	Musc	M.musculus					0.531645569620253				37	0
10jun19_31may19_SKIVE_f6_sp1_10_rev	79	5.6509	0.071255	16	10jun19_31may19_SKIVE_f6_sp1_10_rev_16	1	0			1	42					31may19_SKIVE_f6	SKIVE female	SKIVE	female	Musc	M.musculus					0.531645569620253				37	0
12jul15_12jun15_WSB_m1_sp1_6.3_rev	79	7.1423	0.090261	18	12jul15_12jun15_WSB_m1_sp1_6.3_rev_18	1	0			1	42					12jun15_WSB_m1	WSB male	WSB	male	Dom	M.musculus					0.531645569620253				37	0
1oct16_1apr16_G_m4_sp1_8_rev	47	2.4242	0.051745	12	1oct16_1apr16_G_m4_sp1_8_rev_12	1	0			1	25					1apr16_G_m4	G male	G	male	Dom	M.musculus					0.531914893617021				22	0
20aug15_22jun15_G_m1_sp2_1.2_rev	94	3.2466	0.034497	12	20aug15_22jun15_G_m1_sp2_1.2_rev_12	1	0			1	50					22jun15_G_m1	G male	G	male	Dom	M.musculus					0.531914893617021				44	0
2jul17_20dec16_LEW_m3_sp1_15_rev	62	2.1212	0.034444	4	2jul17_20dec16_LEW_m3_sp1_15_rev_4	1	0			1	33					20dec16_LEW_m3	LEW male	LEW	male	Dom	M.musculus					0.532258064516129				29	0
6mar18_1feb18_LEW_m1_sp1_17_rev	77	5.2529	0.06787	6	6mar18_1feb18_LEW_m1_sp1_17_rev_6	1	0			1	41					1feb18_LEW_m1	LEW male	LEW	male	Dom	M.musculus					0.532467532467532				36	0
11dec17_18nov17_WSB_f1_sp1_16_rev	77	3.1106	0.040167	8	11dec17_18nov17_WSB_f1_sp1_16_rev_8	1	0			1	41					18nov17_WSB_f1	WSB female	WSB	female	Dom	M.musculus					0.532467532467532				36	0
24may17_17mar16_G_f5_sp1_8_rev	92	3.9492	0.042996	9	24may17_17mar16_G_f5_sp1_8_rev_9	1	0			1	49					17mar16_G_f5	G female	G	female	Dom	M.musculus					0.532608695652174				43	0
27jul19_26oct18_SKIVE_f2_sp1_40_rev	122	5.0716	0.041651	36	27jul19_26oct18_SKIVE_f2_sp1_40_rev_36	1	0			1	65					26oct18_SKIVE_f2	SKIVE female	SKIVE	female	Musc	M.musculus					0.5327868852459017				57	0
16feb18_1feb18_KAZ_f4_sp1_6_rev	122	2.1212	0.017361	9	16feb18_1feb18_KAZ_f4_sp1_6_rev_9	1	0			1	65					1feb18_KAZ_f4	KAZ female	KAZ	female	Musc	M.musculus					0.532786885245902				57	0
23jul19_28sep18_CZECH_m2_sp1_10_rev	90	5.8185	0.064658	15	23jul19_28sep18_CZECH_m2_sp1_10_rev_15	1	0			1	48					28sep18_CZECH_m2	CZECH male	CZECH	male	Musc	M.musculus					0.533333333333333				42	0
12feb15_13oct14_G_f2_sp1_1_rev	60	6.2649	0.10493	23	12feb15_13oct14_G_f2_sp1_1_rev_23	1	0			1	32					13oct14_G_f2	G female	G	female	Dom	M.musculus					0.533333333333333				28	0
1mar16_20feb16_G_f3_sp1_10_rev	105	9.2428	0.088201	7	1mar16_20feb16_G_f3_sp1_10_rev_7	1	0			1	56					20feb16_G_f3	G female	G	female	Dom	M.musculus					0.533333333333333				49	0
6mar18_1feb18_LEW_m1_sp1_7_rev	75	1.8462	0.024581	3	6mar18_1feb18_LEW_m1_sp1_7_rev_3	1	0			1	40					1feb18_LEW_m1	LEW male	LEW	male	Dom	M.musculus					0.533333333333333				35	0
29nov17_16nov17_MSM_f1_sp1_28_rev	75	5.7596	0.07712	3	29nov17_16nov17_MSM_f1_sp1_28_rev_3	1	0			1	40					16nov17_MSM_f1	MSM female	MSM	female	Mol	M.musculus					0.533333333333333				35	0
27jul19_26oct18_SKIVE_f1_sp1_22_rev	75	4.7091	0.062672	6	27jul19_26oct18_SKIVE_f1_sp1_22_rev_6	1	0			1	40					26oct18_SKIVE_f1	SKIVE female	SKIVE	female	Musc	M.musculus					0.5333333333333333				35	0
22jul19_26oct18_SKIVE_f3_sp1_11_rev	88	2.5	0.028312	18	22jul19_26oct18_SKIVE_f3_sp1_11_rev_18	1	0			1	47					26oct18_SKIVE_f3	SKIVE female	SKIVE	female	Musc	M.musculus					0.5340909090909091				41	0
7feb18_11jan18_KAZ_m4_sp1_18.2_rev	58	5.0749	0.087131	13	7feb18_11jan18_KAZ_m4_sp1_18.2_rev_13	1	0			1	31					11jan18_KAZ_m4	KAZ male	KAZ	male	Musc	M.musculus					0.53448275862069				27	0
1mar16_20feb16_G_f3_sp1_18_rev	101	4.5144	0.04474	2	1mar16_20feb16_G_f3_sp1_18_rev_2	1	0			1	54					20feb16_G_f3	G female	G	female	Dom	M.musculus					0.534653465346535				47	0
26jan18_11jan18_KAZ_m3_sp1_9.1_rev	101	5.1275	0.050609	6	26jan18_11jan18_KAZ_m3_sp1_9.1_rev_6	1	0			1	54					11jan18_KAZ_m3	KAZ male	KAZ	male	Musc	M.musculus					0.534653465346535				47	0
8feb18_1feb18_KAZ_f1_sp1_11_rev	86	1.4925	0.017287	11	8feb18_1feb18_KAZ_f1_sp1_11_rev_11	1	0			1	46					1feb18_KAZ_f1	KAZ female	KAZ	female	Musc	M.musculus					0.534883720930233				40	0
21nov17_16nov17_MSM_f3_sp1_10_rev	86	4.2955	0.049773	6	21nov17_16nov17_MSM_f3_sp1_10_rev_6	1	0			1	46					16nov17_MSM_f3	MSM female	MSM	female	Mol	M.musculus					0.534883720930233				40	0
11dec17_18nov17_WSB_f1_sp1_8_rev	86	4.8883	0.056534	21	11dec17_18nov17_WSB_f1_sp1_8_rev_21	1	0			1	46					18nov17_WSB_f1	WSB female	WSB	female	Dom	M.musculus					0.534883720930233				40	0
14dec17_18nov17_WSB_f3_sp1_59_rev	86	3.5451	0.041278	7	14dec17_18nov17_WSB_f3_sp1_59_rev_7	1	0			1	46					18nov17_WSB_f3	WSB female	WSB	female	Dom	M.musculus					0.534883720930233				40	0
30jun17_4jan17_LEW_f3_sp1_6_rev	114	6.7264	0.059253	12	30jun17_4jan17_LEW_f3_sp1_6_rev_12	1	0			1	61					4jan17_LEW_f3	LEW female	LEW	female	Dom	M.musculus					0.535087719298246				53	0
10jun19_31may19_SKIVE_f6_sp1_30_rev	99	2.4658	0.024918	15	10jun19_31may19_SKIVE_f6_sp1_30_rev_15	1	0			1	53					31may19_SKIVE_f6	SKIVE female	SKIVE	female	Musc	M.musculus					0.535353535353535				46	0
14dec17_18nov17_WSB_f3_sp1_18_rev	56	3.5121	0.062748	20	14dec17_18nov17_WSB_f3_sp1_18_rev_20	1	0			1	30					18nov17_WSB_f3	WSB female	WSB	female	Dom	M.musculus					0.535714285714286				26	0
15mar16_16jan16_G_f1_sp1_5_rev	97	5.0532	0.052322	4	15mar16_16jan16_G_f1_sp1_5_rev_4	1	0			1	52					16jan16_G_f1	G female	G	female	Dom	M.musculus					0.536082474226804				45	0
11jan19_27oct18_SKIVE_m1_sp1_23.2_rev	97	3.4783	0.035862	18	11jan19_27oct18_SKIVE_m1_sp1_23.2_rev_18	1	0			1	52					27oct18_SKIVE_m1	SKIVE male	SKIVE	male	Musc	M.musculus					0.536082474226804				45	1
26dec17_18nov17_WSB_f4_sp1_9_rev	97	5.1634	0.053084	15	26dec17_18nov17_WSB_f4_sp1_9_rev_15	1	0			1	52					18nov17_WSB_f4	WSB female	WSB	female	Dom	M.musculus					0.536082474226804				45	0
23jul19_28sep18_CZECH_m2_sp1_15.1_rev	69	4.3503	0.063026	4	23jul19_28sep18_CZECH_m2_sp1_15.1_rev_4	1	0			1	37					28sep18_CZECH_m2	CZECH male	CZECH	male	Musc	M.musculus					0.536231884057971				32	0
26dec17_18nov17_WSB_f4_sp1_17_rev	82	4.5933	0.056054	8	26dec17_18nov17_WSB_f4_sp1_17_rev_8	1	0			1	44					18nov17_WSB_f4	WSB female	WSB	female	Dom	M.musculus					0.536585365853659				38	0
12dec17_18nov17_WSB_f2_sp1_17_rev	108	7.5921	0.070229	2	12dec17_18nov17_WSB_f2_sp1_17_rev_2	1	0			1	58					18nov17_WSB_f2	WSB female	WSB	female	Dom	M.musculus					0.537037037037037				50	0
8jun15_23apr15_PWD_f2_sp1_18_rev	121	3.3333	0.027602	19	8jun15_23apr15_PWD_f2_sp1_18_rev_19	1	0			1	65					23apr15_PWD_f2	PWD female	PWD	female	Musc	M.musculus					0.537190082644628				56	0
2jul17_20dec16_LEW_m3_sp1_15_rev	80	4.8811	0.061366	6	2jul17_20dec16_LEW_m3_sp1_15_rev_6	1	0			1	43					20dec16_LEW_m3	LEW male	LEW	male	Dom	M.musculus					0.5375				37	0
7feb18_11jan18_KAZ_f3_sp1_8_rev	93	3.4429	0.037056	11	7feb18_11jan18_KAZ_f3_sp1_8_rev_11	1	0			1	50					11jan18_KAZ_f3	KAZ female	KAZ	female	Musc	M.musculus					0.537634408602151				43	0
8feb18_1feb18_KAZ_f1_sp1_19_rev	65	3.3121	0.051027	7	8feb18_1feb18_KAZ_f1_sp1_19_rev_7	1	0			1	35					1feb18_KAZ_f1	KAZ female	KAZ	female	Musc	M.musculus					0.538461538461538				30	0
7feb18_11jan18_KAZ_m4_sp1_18.2_rev	91	5.4013	0.059076	12	7feb18_11jan18_KAZ_m4_sp1_18.2_rev_12	1	0			1	49					11jan18_KAZ_m4	KAZ male	KAZ	male	Musc	M.musculus					0.538461538461538				42	0
4jun19_28sep18_MOLF_m1_sp1_31_rev	78	5.2124	0.066687	1	4jun19_28sep18_MOLF_m1_sp1_31_rev_1	1	0			1	42					28sep18_MOLF_m1	MOLF male	MOLF	male	Mol	M.musculus					0.538461538461538				36	0
7mar15_1mar15_PWD_m1_sp4_20_rev	52	7.1733	0.13717	12	7mar15_1mar15_PWD_m1_sp4_20_rev_12	1	0			1	28					1mar15_PWD_m1	PWD male	PWD	male	Musc	M.musculus					0.538461538461538				24	1
12dec17_18nov17_WSB_f2_sp1_8_rev	91	2.7273	0.030016	14	12dec17_18nov17_WSB_f2_sp1_8_rev_14	1	0			1	49					18nov17_WSB_f2	WSB female	WSB	female	Dom	M.musculus					0.538461538461538				42	0
1mar16_20feb16_G_f3_sp1_17_rev	115	3.9354	0.034134	6	1mar16_20feb16_G_f3_sp1_17_rev_6	1	0			1	62					20feb16_G_f3	G female	G	female	Dom	M.musculus					0.539130434782609				53	0
26dec17_18nov17_WSB_f4_sp1_6_rev	89	5.1452	0.057869	3	26dec17_18nov17_WSB_f4_sp1_6_rev_3	1	0			1	48				2 faint flianking foci	18nov17_WSB_f4	WSB female	WSB	female	Dom	M.musculus					0.539325842696629				41	0
27jul19_26oct18_SKIVE_f2_sp1_3.1_rev	76	3.6652	0.048534	20	27jul19_26oct18_SKIVE_f2_sp1_3.1_rev_20	1	0			1	41					26oct18_SKIVE_f2	SKIVE female	SKIVE	female	Musc	M.musculus					0.5394736842105263				35	0
8feb18_1feb18_KAZ_f1_sp1_26_rev	100	3.6851	0.03677	4	8feb18_1feb18_KAZ_f1_sp1_26_rev_4	1	0			1	54					1feb18_KAZ_f1	KAZ female	KAZ	female	Musc	M.musculus					0.54				46	0
19jan17_4jan17_LEW_f6_sp1_35_rev	50	3.4783	0.069975	3	19jan17_4jan17_LEW_f6_sp1_35_rev_3	1	0			1	27					4jan17_LEW_f6	LEW female	LEW	female	Dom	M.musculus					0.54				23	0
6mar18_1feb18_LEW_m1_sp1_6.2_rev	100	3.9542	0.039535	12	6mar18_1feb18_LEW_m1_sp1_6.2_rev_12	1	0			1	54					1feb18_LEW_m1	LEW male	LEW	male	Dom	M.musculus					0.54				46	0
12oct18_26sep18_CZECH_m1_sp1_1_rev	74	6.3994	0.085931	2	12oct18_26sep18_CZECH_m1_sp1_1_rev_2	1	0			1	40					26sep18_CZECH_m1	CZECH male	CZECH	male	Musc	M.musculus					0.540540540540541				34	0
9aug15_17apr15_PWD_f2_sp1_9_rev	111	5.236	0.047296	13	9aug15_17apr15_PWD_f2_sp1_9_rev_13	1	0			1	60					17apr15_PWD_f2	PWD female	PWD	female	Musc	M.musculus					0.540540540540541				51	0
21nov17_16nov17_MSM_f3_sp1_10_rev	98	6.3023	0.064416	1	21nov17_16nov17_MSM_f3_sp1_10_rev_1	1	0			1	53					16nov17_MSM_f3	MSM female	MSM	female	Mol	M.musculus					0.540816326530612				45	0
6mar18_1feb18_LEW_m1_sp1_20.2_rev	61	3.9698	0.065233	3	6mar18_1feb18_LEW_m1_sp1_20.2_rev_3	1	0			1	33					1feb18_LEW_m1	LEW male	LEW	male	Dom	M.musculus					0.540983606557377				28	0
17nov16_17mar16_G_f1_sp1_15_rev	120	4.4118	0.036898	18	17nov16_17mar16_G_f1_sp1_15_rev_18	1	0			1	65					17mar16_G_f1	G female	G	female	Dom	M.musculus					0.541666666666667				55	0
7feb18_11jan18_KAZ_m4_sp1_10_rev	120	5.0452	0.041873	10	7feb18_11jan18_KAZ_m4_sp1_10_rev_10	1	0			1	65					11jan18_KAZ_m4	KAZ male	KAZ	male	Musc	M.musculus					0.541666666666667				55	0
19jan17_4jan17_LEW_f6_sp1_19_rev	120	3.0769	0.025571	15	19jan17_4jan17_LEW_f6_sp1_19_rev_15	1	0			1	65					4jan17_LEW_f6	LEW female	LEW	female	Dom	M.musculus					0.541666666666667				55	0
26jan18_11jan18_KAZ_m3_sp1_19_rev	83	6.3607	0.076802	5	26jan18_11jan18_KAZ_m3_sp1_19_rev_5	1	0			1	45					11jan18_KAZ_m3	KAZ male	KAZ	male	Musc	M.musculus					0.542168674698795				38	0
6jan18_13jan17_LEW_f1_sp1_2_rev	83	1.4085	0.016881	2	6jan18_13jan17_LEW_f1_sp1_2_rev_2	1	0			1	45					13jan17_LEW_f1	LEW female	LEW	female	Dom	M.musculus					0.542168674698795				38	0
11dec17_18nov17_WSB_f1_sp1_14_rev	83	5.0798	0.060918	13	11dec17_18nov17_WSB_f1_sp1_14_rev_13	1	0			1	45					18nov17_WSB_f1	WSB female	WSB	female	Dom	M.musculus					0.542168674698795				38	0
27mar16_6mar16_G_m1_sp1_10_rev	59	4.2501	0.07208	6	27mar16_6mar16_G_m1_sp1_10_rev_6	1	0			1	32					6mar16_G_m1	G male	G	male	Dom	M.musculus					0.542372881355932				27	0
27mar16_6mar16_G_m3_sp1_15.2_rev	59	4	0.067277	3	27mar16_6mar16_G_m3_sp1_15.2_rev_3	1	0			1	32					6mar16_G_m3	G male	G	male	Dom	M.musculus					0.542372881355932				27	0
1mar18_1feb18_KAZ_f3_sp1_1_rev	94	3.8361	0.040756	6	1mar18_1feb18_KAZ_f3_sp1_1_rev_6	1	0			1	51					1feb18_KAZ_f3	KAZ female	KAZ	female	Musc	M.musculus					0.542553191489362				43	0
2apr15_28feb15_PWD_f3_sp1_2_rev	94	6.921	0.073525	6	2apr15_28feb15_PWD_f3_sp1_2_rev_6	1	0			1	51					28feb15_PWD_f3	PWD female	PWD	female	Musc	M.musculus					0.542553191489362				43	0
14dec17_18nov17_WSB_f3_sp1_35_rev	94	1.8919	0.020095	14	14dec17_18nov17_WSB_f3_sp1_35_rev_14	1	0			1	51					18nov17_WSB_f3	WSB female	WSB	female	Dom	M.musculus					0.542553191489362				43	0
13sep18_28jun18_MOLF_m1_sp1_24_rev	70	3.75	0.053708	3	13sep18_28jun18_MOLF_m1_sp1_24_rev_3	1	0			1	38					28jun18_MOLF_m1	MOLF male	MOLF	male	Mol	M.musculus					0.542857142857143				32	0
2aug19_28sep18_MOLF_m2_sp1_13_rev	70	2.3881	0.034154	15	2aug19_28sep18_MOLF_m2_sp1_13_rev_15	1	0			1	38					28sep18_MOLF_m2	MOLF male	MOLF	male	Mol	M.musculus					0.542857142857143				32	0
26dec17_18nov17_WSB_f4_sp1_4_rev	116	3.8874	0.033435	15	26dec17_18nov17_WSB_f4_sp1_4_rev_15	1	0			1	63					18nov17_WSB_f4	WSB female	WSB	female	Dom	M.musculus					0.543103448275862				53	0
6mar18_1feb18_LEW_m1_sp1_3_rev	92	3.317	0.036001	8	6mar18_1feb18_LEW_m1_sp1_3_rev_8	1	0			1	50					1feb18_LEW_m1	LEW male	LEW	male	Dom	M.musculus					0.543478260869565				42	0
9aug15_17apr15_PWD_f2_sp1_22_rev	92	1.9355	0.02095	25	9aug15_17apr15_PWD_f2_sp1_22_rev_25	1	0			1	50					17apr15_PWD_f2	PWD female	PWD	female	Musc	M.musculus					0.543478260869565				42	0
7feb18_11jan18_KAZ_m4_sp1_5_rev	114	3.7143	0.032516	13	7feb18_11jan18_KAZ_m4_sp1_5_rev_13	1	0			1	62					11jan18_KAZ_m4	KAZ male	KAZ	male	Musc	M.musculus					0.543859649122807				52	0
18sep19_19aug19_SKIVE_m2_sp1_18.1_rev	57	4.482	0.078528	19	18sep19_19aug19_SKIVE_m2_sp1_18.1_rev_19	1	0			1	31					19aug19_SKIVE_m2	SKIVE male	SKIVE	male	Musc	M.musculus					0.543859649122807				26	1
20may15_17apr15_PWD_f4_sp1_23_rev	125	7.0312	0.056283	4	20may15_17apr15_PWD_f4_sp1_23_rev_4	1	0			1	68					17apr15_PWD_f4	PWD female	PWD	female	Musc	M.musculus					0.544				57	0
17mar15_10mar15_PWD_m1_sp1_8_rev	68	5.1681	0.076366	13	17mar15_10mar15_PWD_m1_sp1_8_rev_13	1	0			1	37					10mar15_PWD_m1	PWD male	PWD	male	Musc	M.musculus					0.544117647058823				31	1
1mar18_1feb18_KAZ_f3_sp1_3_rev	79	5.4796	0.069105	21	1mar18_1feb18_KAZ_f3_sp1_3_rev_21	1	0			1	43					1feb18_KAZ_f3	KAZ female	KAZ	female	Musc	M.musculus					0.544303797468354				36	0
13sep18_28jun18_MOLF_m1_sp1_21.1_rev	79	5.16	0.065262	10	13sep18_28jun18_MOLF_m1_sp1_21.1_rev_10	1	0			1	43					28jun18_MOLF_m1	MOLF male	MOLF	male	Mol	M.musculus					0.544303797468354				36	0
20may15_17apr15_PWD_f4_sp1_14_rev	90	6.9757	0.07785	6	20may15_17apr15_PWD_f4_sp1_14_rev_6	1	0			1	49					17apr15_PWD_f4	PWD female	PWD	female	Musc	M.musculus					0.544444444444444				41	0
10jun19_31may19_SKIVE_f6_sp1_8_rev	90	3.1746	0.035435	21	10jun19_31may19_SKIVE_f6_sp1_8_rev_21	1	0			1	49					31may19_SKIVE_f6	SKIVE female	SKIVE	female	Musc	M.musculus					0.544444444444444				41	0
11dec17_18nov17_WSB_f1_sp1_4_rev	101	4.3285	0.042862	14	11dec17_18nov17_WSB_f1_sp1_4_rev_14	1	0			1	55					18nov17_WSB_f1	WSB female	WSB	female	Dom	M.musculus					0.544554455445545				46	0
12oct18_26sep18_CZECH_m1_sp1_10_rev	66	8.575	0.12899	6	12oct18_26sep18_CZECH_m1_sp1_10_rev_6	1	0			1	36					26sep18_CZECH_m1	CZECH male	CZECH	male	Musc	M.musculus					0.545454545454545				30	0
7feb18_11jan18_KAZ_m4_sp1_18.2_rev	44	4.275	0.096585	17	7feb18_11jan18_KAZ_m4_sp1_18.2_rev_17	1	0			1	24					11jan18_KAZ_m4	KAZ male	KAZ	male	Musc	M.musculus					0.545454545454545				20	0
2aug19_28sep18_MOLF_m2_sp1_8_rev	77	4.721	0.061325	14	2aug19_28sep18_MOLF_m2_sp1_8_rev_14	1	0			1	42					28sep18_MOLF_m2	MOLF male	MOLF	male	Mol	M.musculus					0.545454545454545				35	0
12feb15_13oct14_G_f2_sp1_10_rev	119	3.3281	0.027943	16	12feb15_13oct14_G_f2_sp1_10_rev_16	1	0			1	65					13oct14_G_f2	G female	G	female	Dom	M.musculus					0.546218487394958				54	0
14dec17_18nov17_WSB_f3_sp1_6_rev	119	4.013	0.03385	11	14dec17_18nov17_WSB_f3_sp1_6_rev_11	1	0			1	65					18nov17_WSB_f3	WSB female	WSB	female	Dom	M.musculus					0.546218487394958				54	0
2aug19_28sep18_MOLF_m2_sp1_3_rev	97	3.2836	0.033737	11	2aug19_28sep18_MOLF_m2_sp1_3_rev_11	1	0			1	53					28sep18_MOLF_m2	MOLF male	MOLF	male	Mol	M.musculus					0.54639175257732				44	0
6jan18_13jan17_LEW_f1_sp1_2_rev	86	4.7844	0.055503	13	6jan18_13jan17_LEW_f1_sp1_2_rev_13	1	0			1	47					13jan17_LEW_f1	LEW female	LEW	female	Dom	M.musculus					0.546511627906977				39	0
2aug15_8oct14_PWD_f4_sp1_15_rev	86	5.3226	0.061977	2	2aug15_8oct14_PWD_f4_sp1_15_rev_2	1	0			1	47					8oct14_PWD_f4	PWD female	PWD	female	Musc	M.musculus					0.546511627906977				39	0
15mar16_16jan16_G_f1_sp1_3_rev	75	6.7733	0.090112	15	15mar16_16jan16_G_f1_sp1_3_rev_15	1	0			1	41					16jan16_G_f1	G female	G	female	Dom	M.musculus					0.546666666666667				34	0
14dec17_18nov17_WSB_f3_sp1_22_rev	95	3.1048	0.032556	7	14dec17_18nov17_WSB_f3_sp1_22_rev_7	1	0			1	52					18nov17_WSB_f3	WSB female	WSB	female	Dom	M.musculus					0.547368421052632				43	0
26dec17_18nov17_WSB_f4_sp1_11_rev	95	3.3803	0.035628	17	26dec17_18nov17_WSB_f4_sp1_11_rev_17	1	0			1	52					18nov17_WSB_f4	WSB female	WSB	female	Dom	M.musculus					0.547368421052632				43	0
27mar16_6mar16_G_m3_sp1_15.1_rev	73	4.7027	0.064165	12	27mar16_6mar16_G_m3_sp1_15.1_rev_12	1	0			1	40					6mar16_G_m3	G male	G	male	Dom	M.musculus					0.547945205479452				33	0
16feb16_17mar16_G_f4_sp1_5_rev	104	3.9775	0.038219	1	16feb16_17mar16_G_f4_sp1_5_rev_1	1	0			1	57				2 faint flanking foci	17mar16_G_f4	G female	G	female	Dom	M.musculus					0.548076923076923				47	0
1mar16_20feb16_G_f3_sp1_15_rev	104	8.6638	0.083324	7	1mar16_20feb16_G_f3_sp1_15_rev_7	1	0			1	57					20feb16_G_f3	G female	G	female	Dom	M.musculus					0.548076923076923				47	0
1mar16_20feb16_G_f3_sp1_7_rev	93	3.8907	0.041789	6	1mar16_20feb16_G_f3_sp1_7_rev_6	1	0			1	51					20feb16_G_f3	G female	G	female	Dom	M.musculus					0.548387096774194				42	0
27mar16_6mar16_G_m2_sp1_2_rev	62	6.9385	0.11146	7	27mar16_6mar16_G_m2_sp1_2_rev_7	1	0			1	34					6mar16_G_m2	G male	G	male	Dom	M.musculus					0.548387096774194				28	0
21nov17_16nov17_MSM_f3_sp1_14_rev	155	4.8164	0.031032	4	21nov17_16nov17_MSM_f3_sp1_14_rev_4	1	0			1	85					16nov17_MSM_f3	MSM female	MSM	female	Mol	M.musculus					0.548387096774194				70	0
14dec17_18nov17_WSB_f3_sp1_3_rev	93	4.739	0.051186	7	14dec17_18nov17_WSB_f3_sp1_3_rev_7	1	0			1	51					18nov17_WSB_f3	WSB female	WSB	female	Dom	M.musculus					0.548387096774194				42	0
2aug19_28sep18_MOLF_m2_sp1_3_rev	82	5.7689	0.070116	3	2aug19_28sep18_MOLF_m2_sp1_3_rev_3	1	0			1	45					28sep18_MOLF_m2	MOLF male	MOLF	male	Mol	M.musculus					0.548780487804878				37	0
5jan19_27oct18_SKIVE_m2_sp1_5_rev	82	3.7356	0.045451	11	5jan19_27oct18_SKIVE_m2_sp1_5_rev_11	1	0			1	45					27oct18_SKIVE_m2	SKIVE male	SKIVE	male	Musc	M.musculus					0.548780487804878				37	1
27jul19_26oct18_SKIVE_f2_sp1_40_rev	82	2.2535	0.027529	25	27jul19_26oct18_SKIVE_f2_sp1_40_rev_25	1	0			1	45					26oct18_SKIVE_f2	SKIVE female	SKIVE	female	Musc	M.musculus					0.5487804878048781				37	0
20may15_17apr15_PWD_f4_sp1_14_rev	102	9.9909	0.097715	10	20may15_17apr15_PWD_f4_sp1_14_rev_10	1	0			1	56					17apr15_PWD_f4	PWD female	PWD	female	Musc	M.musculus					0.549019607843137				46	0
19oct15_12oct15_G_m1_sp1_9_rev	71	3.4824	0.048731	14	19oct15_12oct15_G_m1_sp1_9_rev_14	1	0			1	39					12oct15_G_m1	G male	G	male	Dom	M.musculus					0.549295774647887				32	0
2jul17_20dec16_LEW_m3_sp1_22_rev	71	4.7321	0.066578	11	2jul17_20dec16_LEW_m3_sp1_22_rev_11	1	0			1	39					20dec16_LEW_m3	LEW male	LEW	male	Dom	M.musculus					0.549295774647887				32	0
11dec17_18nov17_WSB_f1_sp1_11_rev	111	3.8377	0.03457	7	11dec17_18nov17_WSB_f1_sp1_11_rev_7	1	0			1	61				12 not shown	18nov17_WSB_f1	WSB female	WSB	female	Dom	M.musculus					0.54954954954955				50	0
1mar18_1feb18_KAZ_f3_sp1_1_rev	131	6.0636	0.046459	12	1mar18_1feb18_KAZ_f3_sp1_1_rev_12	1	0			1	72					1feb18_KAZ_f3	KAZ female	KAZ	female	Musc	M.musculus					0.549618320610687				59	0
2jul17_20dec16_LEW_m3_sp1_13_rev	80	4.3243	0.054073	15	2jul17_20dec16_LEW_m3_sp1_13_rev_15	1	0			1	44					20dec16_LEW_m3	LEW male	LEW	male	Dom	M.musculus					0.55				36	0
2jul17_20dec16_LEW_m3_sp1_14_rev	60	5.9792	0.09939	18	2jul17_20dec16_LEW_m3_sp1_14_rev_18	1	0			1	33					20dec16_LEW_m3	LEW male	LEW	male	Dom	M.musculus					0.55				27	0
6jun18_13jan17_LEW_f2_sp1_18_rev	80	2.7119	0.034046	14	6jun18_13jan17_LEW_f2_sp1_18_rev_14	1	0			1	44					13jan17_LEW_f2	LEW female	LEW	female	Dom	M.musculus					0.55				36	0
29nov17_16nov17_MSM_f1_sp1_28_rev	100	3.4999	0.035054	13	29nov17_16nov17_MSM_f1_sp1_28_rev_13	1	0			1	55					16nov17_MSM_f1	MSM female	MSM	female	Mol	M.musculus					0.55				45	0
2aug15_8oct14_PWD_f4_sp1_11.1_rev	80	3.6212	0.045042	15	2aug15_8oct14_PWD_f4_sp1_11.1_rev_15	1	0			1	44					8oct14_PWD_f4	PWD female	PWD	female	Musc	M.musculus					0.55				36	0
8jun15_23apr15_PWD_f2_sp1_12_rev	100	4.2383	0.042506	10	8jun15_23apr15_PWD_f2_sp1_12_rev_10	1	0			1	55					23apr15_PWD_f2	PWD female	PWD	female	Musc	M.musculus					0.55				45	0
10apr15_31mar15_WSB_m1_sp1_7_rev	60	3.8399	0.064127	3	10apr15_31mar15_WSB_m1_sp1_7_rev_3	1	0			1	33					31mar15_WSB_m1	WSB male	WSB	male	Dom	M.musculus					0.55				27	0
20jul15_18may15_PWD_m1_sp1_24_rev	127	3.5783	0.028144	8	20jul15_18may15_PWD_m1_sp1_24_rev_8	1	0			1	70					18may15_PWD_m1	PWD male	PWD	male	Musc	M.musculus					0.551181102362205				57	1
8feb17_20dec16_LEW_m1_sp1_13_rev	107	2.3529	0.021994	9	8feb17_20dec16_LEW_m1_sp1_13_rev_9	1	0			1	59					20dec16_LEW_m1	LEW male	LEW	male	Dom	M.musculus					0.551401869158878				48	0
21nov17_16nov17_MSM_f3_sp1_17_rev	87	9.8268	0.11333	20	21nov17_16nov17_MSM_f3_sp1_17_rev_20	1	0			1	48					16nov17_MSM_f3	MSM female	MSM	female	Mol	M.musculus					0.551724137931034				39	0
8feb18_1feb18_KAZ_f1_sp1_16_rev	125	7.5974	0.06071	14	8feb18_1feb18_KAZ_f1_sp1_16_rev_14	1	0			1	69					1feb18_KAZ_f1	KAZ female	KAZ	female	Musc	M.musculus					0.552				56	0
12oct18_26sep18_CZECH_m1_sp1_12.1_rev	96	5.547	0.057947	4	12oct18_26sep18_CZECH_m1_sp1_12.1_rev_4	1	0			1	53					26sep18_CZECH_m1	CZECH male	CZECH	male	Musc	M.musculus					0.552083333333333				43	0
13sep18_28jun18_MOLF_m1_sp1_10.1_rev	67	1.8182	0.027257	18	13sep18_28jun18_MOLF_m1_sp1_10.1_rev_18	1	0			1	37					28jun18_MOLF_m1	MOLF male	MOLF	male	Mol	M.musculus					0.552238805970149				30	0
11jan19_27oct18_SKIVE_m1_sp1_23.1_rev	105	2.5397	0.024129	13	11jan19_27oct18_SKIVE_m1_sp1_23.1_rev_13	1	0			1	58					27oct18_SKIVE_m1	SKIVE male	SKIVE	male	Musc	M.musculus					0.552380952380952				47	1
13sep18_28jun18_MOLF_m1_sp1_23_rev	76	6.4839	0.085684	3	13sep18_28jun18_MOLF_m1_sp1_23_rev_3	1	0			1	42					28jun18_MOLF_m1	MOLF male	MOLF	male	Mol	M.musculus					0.552631578947368				34	0
21nov17_16nov17_MSM_f3_sp1_9_rev	76	3.0303	0.039741	5	21nov17_16nov17_MSM_f3_sp1_9_rev_5	1	0			1	42					16nov17_MSM_f3	MSM female	MSM	female	Mol	M.musculus					0.552631578947368				34	0
19jan17_4jan17_LEW_f6_sp1_45_rev	47	3.4853	0.074832	13	19jan17_4jan17_LEW_f6_sp1_45_rev_13	1	0			1	26					4jan17_LEW_f6	LEW female	LEW	female	Dom	M.musculus					0.553191489361702				21	0
21nov17_16nov17_MSM_f3_sp1_10_rev	103	3.5201	0.034267	9	21nov17_16nov17_MSM_f3_sp1_10_rev_9	1	0			1	57					16nov17_MSM_f3	MSM female	MSM	female	Mol	M.musculus					0.553398058252427				46	0
8feb18_1feb18_KAZ_f1_sp1_3_rev	56	2.9851	0.053721	17	8feb18_1feb18_KAZ_f1_sp1_3_rev_17	1	0			1	31					1feb18_KAZ_f1	KAZ female	KAZ	female	Musc	M.musculus					0.553571428571429				25	0
10jun19_31may19_SKIVE_f6_sp1_21_rev	121	3.4921	0.028937	8	10jun19_31may19_SKIVE_f6_sp1_21_rev_8	1	0			1	67					31may19_SKIVE_f6	SKIVE female	SKIVE	female	Musc	M.musculus					0.553719008264463				54	0
30jun17_4jan17_LEW_f3_sp1_1_rev	65	3.3304	0.050924	5	30jun17_4jan17_LEW_f3_sp1_1_rev_5	1	0			1	36					4jan17_LEW_f3	LEW female	LEW	female	Dom	M.musculus					0.553846153846154				29	0
6mar18_1feb18_LEW_m1_sp1_13_rev	74	4.2851	0.057783	20	6mar18_1feb18_LEW_m1_sp1_13_rev_20	1	0			1	41					1feb18_LEW_m1	LEW male	LEW	male	Dom	M.musculus					0.554054054054054				33	0
26dec17_18nov17_WSB_f4_sp1_16_rev	74	4.2463	0.057031	9	26dec17_18nov17_WSB_f4_sp1_16_rev_9	1	0			1	41					18nov17_WSB_f4	WSB female	WSB	female	Dom	M.musculus					0.554054054054054				33	0
7feb18_11jan18_KAZ_m4_sp1_19_rev	83	6.8034	0.082375	12	7feb18_11jan18_KAZ_m4_sp1_19_rev_12	1	0			1	46					11jan18_KAZ_m4	KAZ male	KAZ	male	Musc	M.musculus					0.55421686746988				37	0
12dec17_18nov17_WSB_f2_sp1_18_rev	83	3.7114	0.044604	8	12dec17_18nov17_WSB_f2_sp1_18_rev_8	1	0			1	46					18nov17_WSB_f2	WSB female	WSB	female	Dom	M.musculus					0.55421686746988				37	0
20may15_17apr15_PWD_f4_sp1_11_rev	92	6.6256	0.072251	7	20may15_17apr15_PWD_f4_sp1_11_rev_7	1	0			1	51					17apr15_PWD_f4	PWD female	PWD	female	Musc	M.musculus					0.554347826086957				41	0
6jun18_13jan17_LEW_f2_sp1_14_rev	101	4.1818	0.041324	6	6jun18_13jan17_LEW_f2_sp1_14_rev_6	1	0			1	56					13jan17_LEW_f2	LEW female	LEW	female	Dom	M.musculus					0.554455445544555				45	0
3mar15_13jan17_LEW_m1_sp1_24.2_rev	101	2.5	0.024845	9	3mar15_13jan17_LEW_m1_sp1_24.2_rev_9	1	0			1	56					13jan17_LEW_m1	LEW male	LEW	male	Dom	M.musculus					0.554455445544555				45	0
14dec17_18nov17_WSB_f3_sp1_10_rev	101	3.1746	0.03154	2	14dec17_18nov17_WSB_f3_sp1_10_rev_2	1	0			1	56					18nov17_WSB_f3	WSB female	WSB	female	Dom	M.musculus					0.554455445544555				45	0
11dec17_18nov17_WSB_f1_sp1_25_rev	110	7.8064	0.070823	8	11dec17_18nov17_WSB_f1_sp1_25_rev_8	1	0			1	61				smaller fainter foci near cent	18nov17_WSB_f1	WSB female	WSB	female	Dom	M.musculus					0.554545454545455				49	0
22jul19_26oct18_SKIVE_f3_sp1_12.2_rev	128	7.2237	0.056638	15	22jul19_26oct18_SKIVE_f3_sp1_12.2_rev_15	1	0			1	71					26oct18_SKIVE_f3	SKIVE female	SKIVE	female	Musc	M.musculus					0.5546875				57	0
20may15_17apr15_PWD_f4_sp1_20_rev	218	4.2935	0.019721	5	20may15_17apr15_PWD_f4_sp1_20_rev_5	1	0			1	121					17apr15_PWD_f4	PWD female	PWD	female	Musc	M.musculus					0.555045871559633				97	0
27jul19_26oct18_SKIVE_f2_sp1_13_rev	63	2.0896	0.033231	26	27jul19_26oct18_SKIVE_f2_sp1_13_rev_26	1	0			1	35					26oct18_SKIVE_f2	SKIVE female	SKIVE	female	Musc	M.musculus					0.5555555555555556				28	0
12oct18_26sep18_CZECH_m1_sp1_6.2_rev	81	3.0303	0.03753	3	12oct18_26sep18_CZECH_m1_sp1_6.2_rev_3	1	0			1	45					26sep18_CZECH_m1	CZECH male	CZECH	male	Musc	M.musculus					0.555555555555556				36	0
24may17_17mar16_G_f5_sp1_4_rev	135	3.3846	0.02511	9	24may17_17mar16_G_f5_sp1_4_rev_9	1	0			1	75					17mar16_G_f5	G female	G	female	Dom	M.musculus					0.555555555555556				60	0
26jan18_11jan18_KAZ_m3_sp1_1_rev	63	3.2787	0.051701	8	26jan18_11jan18_KAZ_m3_sp1_1_rev_8	1	0			1	35					11jan18_KAZ_m3	KAZ male	KAZ	male	Musc	M.musculus					0.555555555555556				28	0
2aug15_8oct14_PWD_f4_sp1_10.1_rev	90	9.4627	0.10462	15	2aug15_8oct14_PWD_f4_sp1_10.1_rev_15	1	0			1	50					8oct14_PWD_f4	PWD female	PWD	female	Musc	M.musculus					0.555555555555556				40	0
20jul15_18may15_PWD_m1_sp1_22_rev	54	3.1856	0.059035	10	20jul15_18may15_PWD_m1_sp1_22_rev_10	1	0			1	30					18may15_PWD_m1	PWD male	PWD	male	Musc	M.musculus					0.555555555555556				24	1
29nov16_13nov16_MSM_m2_sp1_12_rev	106	6.574	0.061946	4	29nov16_13nov16_MSM_m2_sp1_12_rev_4	1	0			1	59					13nov16_MSM_m2	MSM male	MSM	male	Mol	M.musculus					0.556603773584906				47	1
19jan17_4jan17_LEW_f7_sp1_32_rev	70	2.1053	0.030211	3	19jan17_4jan17_LEW_f7_sp1_32_rev_3	1	0			1	39					4jan17_LEW_f7	LEW female	LEW	female	Dom	M.musculus					0.557142857142857				31	0
1oct16_1apr16_G_m4_sp1_7_rev	61	4.0648	0.066635	15	1oct16_1apr16_G_m4_sp1_7_rev_15	1	0			1	34					1apr16_G_m4	G male	G	male	Dom	M.musculus					0.557377049180328				27	0
20may15_17apr15_PWD_f4_sp1_5_rev	122	6.64	0.054591	16	20may15_17apr15_PWD_f4_sp1_5_rev_16	1	0			1	68					17apr15_PWD_f4	PWD female	PWD	female	Musc	M.musculus					0.557377049180328				54	0
8jun15_23apr15_PWD_f2_sp1_2_rev	95	5.2599	0.055465	18	8jun15_23apr15_PWD_f2_sp1_2_rev_18	1	0			1	53					23apr15_PWD_f2	PWD female	PWD	female	Musc	M.musculus					0.557894736842105				42	0
21nov17_16nov17_MSM_f3_sp1_10_rev	111	2.7115	0.024527	10	21nov17_16nov17_MSM_f3_sp1_10_rev_10	1	0			1	62					16nov17_MSM_f3	MSM female	MSM	female	Mol	M.musculus					0.558558558558559				49	0
26dec17_18nov17_WSB_f4_sp1_29_rev	111	5.3364	0.048189	12	26dec17_18nov17_WSB_f4_sp1_29_rev_12	1	0			1	62					18nov17_WSB_f4	WSB female	WSB	female	Dom	M.musculus					0.558558558558559				49	0
6mar18_1feb18_LEW_m1_sp1_20.2_rev	68	3.5064	0.051483	10	6mar18_1feb18_LEW_m1_sp1_20.2_rev_10	1	0			1	38					1feb18_LEW_m1	LEW male	LEW	male	Dom	M.musculus					0.558823529411765				30	0
27jul19_26oct18_SKIVE_f1_sp1_3_rev	93	4.0621	0.04358	11	27jul19_26oct18_SKIVE_f1_sp1_3_rev_11	1	0			1	52					26oct18_SKIVE_f1	SKIVE female	SKIVE	female	Musc	M.musculus					0.5591397849462365				41	0
9aug15_17apr15_PWD_f2_sp1_18.1_rev	93	10.8992	0.11697	2	9aug15_17apr15_PWD_f2_sp1_18.1_rev_2	1	0			1	52					17apr15_PWD_f2	PWD female	PWD	female	Musc	M.musculus					0.559139784946237				41	0
18sep19_19aug19_SKIVE_m2_sp1_13_rev	93	1.6949	0.018136	11	18sep19_19aug19_SKIVE_m2_sp1_13_rev_11	1	0			1	52					19aug19_SKIVE_m2	SKIVE male	SKIVE	male	Musc	M.musculus					0.559139784946237				41	1
17feb15_13oct14_G_f2_sp1_40_rev	59	7.8979	0.13455	20	17feb15_13oct14_G_f2_sp1_40_rev_20	1	0			1	33					13oct14_G_f2	G female	G	female	Dom	M.musculus					0.559322033898305				26	0
11jan19_27oct18_SKIVE_m1_sp1_24_rev	59	2.9851	0.050329	12	11jan19_27oct18_SKIVE_m1_sp1_24_rev_12	1	0			1	33					27oct18_SKIVE_m1	SKIVE male	SKIVE	male	Musc	M.musculus					0.559322033898305				26	1
8feb18_1feb18_KAZ_f1_sp1_6_rev	75	6.373	0.085399	3	8feb18_1feb18_KAZ_f1_sp1_6_rev_3	1	0			1	42					1feb18_KAZ_f1	KAZ female	KAZ	female	Musc	M.musculus					0.56				33	0
19jan17_4jan17_LEW_f6_sp1_23_rev	50	3.1429	0.062943	6	19jan17_4jan17_LEW_f6_sp1_23_rev_6	1	0			1	28					4jan17_LEW_f6	LEW female	LEW	female	Dom	M.musculus					0.56				22	0
3mar15_13jan17_LEW_m1_sp1_18_rev	50	3.4783	0.069061	6	3mar15_13jan17_LEW_m1_sp1_18_rev_6	1	0			1	28					13jan17_LEW_m1	LEW male	LEW	male	Dom	M.musculus					0.56				22	0
22jul19_26oct18_SKIVE_f3_sp1_14.1_rev	100	4.705	0.047256	18	22jul19_26oct18_SKIVE_f3_sp1_14.1_rev_18	1	0			1	56					26oct18_SKIVE_f3	SKIVE female	SKIVE	female	Musc	M.musculus					0.56				44	0
9aug15_17apr15_PWD_f2_sp1_3.2_rev	107	7.5474	0.070249	21	9aug15_17apr15_PWD_f2_sp1_3.2_rev_21	1	0			1	60					17apr15_PWD_f2	PWD female	PWD	female	Musc	M.musculus					0.560747663551402				47	0
1mar16_20feb16_G_f3_sp1_19_rev	123	5.6924	0.046363	13	1mar16_20feb16_G_f3_sp1_19_rev_13	1	0			1	69					20feb16_G_f3	G female	G	female	Dom	M.musculus					0.560975609756098				54	0
16feb18_1feb18_KAZ_f4_sp1_4_rev	164	6.4049	0.03911	12	16feb18_1feb18_KAZ_f4_sp1_4_rev_12	1	0			1	92					1feb18_KAZ_f4	KAZ female	KAZ	female	Musc	M.musculus					0.560975609756098				72	0
15mar17_13jan17_LEW_f3_sp1_3_rev	82	7.9977	0.097569	8	15mar17_13jan17_LEW_f3_sp1_3_rev_8	1	0			1	46					13jan17_LEW_f3	LEW female	LEW	female	Dom	M.musculus					0.560975609756098				36	0
20jul15_18may15_PWD_m2_sp1_15.2_rev	98	8.7159	0.088534	13	20jul15_18may15_PWD_m2_sp1_15.2_rev_13	1	0			1	55					18may15_PWD_m2	PWD male	PWD	male	Musc	M.musculus					0.561224489795918				43	1
14dec17_18nov17_WSB_f3_sp1_35_rev	114	5.3459	0.046771	13	14dec17_18nov17_WSB_f3_sp1_35_rev_13	1	0			1	64					18nov17_WSB_f3	WSB female	WSB	female	Dom	M.musculus					0.56140350877193				50	0
20aug15_22jun15_G_m1_sp2_19.2_rev	89	5.9974	0.067721	11	20aug15_22jun15_G_m1_sp2_19.2_rev_11	1	0			1	50					22jun15_G_m1	G male	G	male	Dom	M.musculus					0.561797752808989				39	0
10jan18_13jan17_LEW_f1_sp1_14_rev	89	2.5714	0.028807	13	10jan18_13jan17_LEW_f1_sp1_14_rev_13	1	0			1	50					13jan17_LEW_f1	LEW female	LEW	female	Dom	M.musculus					0.561797752808989				39	0
29nov17_16nov17_MSM_f1_sp1_1_rev	105	2.5	0.023724	2	29nov17_16nov17_MSM_f1_sp1_1_rev_2	1	0			1	59					16nov17_MSM_f1	MSM female	MSM	female	Mol	M.musculus					0.561904761904762				46	0
12dec17_18nov17_WSB_f2_sp1_7_rev	71	7.1247	0.10016	2	12dec17_18nov17_WSB_f2_sp1_7_rev_2	1	0			1	40					18nov17_WSB_f2	WSB female	WSB	female	Dom	M.musculus					0.563380281690141				31	0
16feb18_1feb18_KAZ_f4_sp1_6_rev	55	4.4539	0.081375	7	16feb18_1feb18_KAZ_f4_sp1_6_rev_7	1	0			1	31					1feb18_KAZ_f4	KAZ female	KAZ	female	Musc	M.musculus					0.563636363636364				24	0
4jun19_28sep18_MOLF_m1_sp1_5_rev	55	3.7432	0.068497	14	4jun19_28sep18_MOLF_m1_sp1_5_rev_14	1	0			1	31					28sep18_MOLF_m1	MOLF male	MOLF	male	Mol	M.musculus					0.563636363636364				24	0
8jun15_23apr15_PWD_f2_sp1_13_rev	149	5.3665	0.035995	18	8jun15_23apr15_PWD_f2_sp1_13_rev_18	1	0			1	84					23apr15_PWD_f2	PWD female	PWD	female	Musc	M.musculus					0.563758389261745				65	0
10jun19_31may19_SKIVE_f6_sp1_60_rev	78	4.3553	0.056085	2	10jun19_31may19_SKIVE_f6_sp1_60_rev_2	1	0			1	44					31may19_SKIVE_f6	SKIVE female	SKIVE	female	Musc	M.musculus					0.564102564102564				34	0
11dec17_18nov17_WSB_f1_sp1_14_rev	85	1.2308	0.014488	12	11dec17_18nov17_WSB_f1_sp1_14_rev_12	1	0			1	48					18nov17_WSB_f1	WSB female	WSB	female	Dom	M.musculus					0.564705882352941				37	0
27jul19_26oct18_SKIVE_f1_sp1_12_rev	115	2.1212	0.018474	3	27jul19_26oct18_SKIVE_f1_sp1_12_rev_3	1	0			1	65					26oct18_SKIVE_f1	SKIVE female	SKIVE	female	Musc	M.musculus					0.5652173913043478				50	0
12may15_30sep14_G_m5_sp1_10_rev	69	4.3991	0.06354	2	12may15_30sep14_G_m5_sp1_10_rev_2	1	0			1	39					30sep14_G_m5	G male	G	male	Dom	M.musculus					0.565217391304348				30	0
7feb18_11jan18_KAZ_m4_sp1_18.1_rev	69	4.6233	0.066879	4	7feb18_11jan18_KAZ_m4_sp1_18.1_rev_4	1	0			1	39					11jan18_KAZ_m4	KAZ male	KAZ	male	Musc	M.musculus					0.565217391304348				30	0
8feb17_20dec16_LEW_m1_sp1_13_rev	46	4.5469	0.09971	7	8feb17_20dec16_LEW_m1_sp1_13_rev_7	1	0			1	26					20dec16_LEW_m1	LEW male	LEW	male	Dom	M.musculus					0.565217391304348				20	0
12dec17_18nov17_WSB_f2_sp1_19_rev	92	2.7946	0.030475	1	12dec17_18nov17_WSB_f2_sp1_19_rev_1	1	0			1	52					18nov17_WSB_f2	WSB female	WSB	female	Dom	M.musculus					0.565217391304348				40	0
12jul15_12jun15_WSB_m1_sp1_3_rev	69	4.3347	0.062426	14	12jul15_12jun15_WSB_m1_sp1_3_rev_14	1	0			1	39					12jun15_WSB_m1	WSB male	WSB	male	Dom	M.musculus					0.565217391304348				30	0
8jun15_23apr15_PWD_f2_sp1_16_rev	145	4.1021	0.028232	7	8jun15_23apr15_PWD_f2_sp1_16_rev_7	1	0			1	82					23apr15_PWD_f2	PWD female	PWD	female	Musc	M.musculus					0.56551724137931				63	0
29nov17_16nov17_MSM_f1_sp1_15.1_rev	99	1.8462	0.01859	14	29nov17_16nov17_MSM_f1_sp1_15.1_rev_14	1	0			1	56					16nov17_MSM_f1	MSM female	MSM	female	Mol	M.musculus					0.565656565656566				43	0
12feb15_13oct14_G_f2_sp1_2_rev	152	4.387	0.028814	13	12feb15_13oct14_G_f2_sp1_2_rev_13	1	0			1	86					13oct14_G_f2	G female	G	female	Dom	M.musculus					0.565789473684211				66	0
11dec17_18nov17_WSB_f1_sp1_25_rev	76	5.6849	0.074819	14	11dec17_18nov17_WSB_f1_sp1_25_rev_14	1	0			1	43					18nov17_WSB_f1	WSB female	WSB	female	Dom	M.musculus					0.565789473684211				33	0
13sep18_28jun18_MOLF_m1_sp1_10.1_rev	53	3.5821	0.068139	8	13sep18_28jun18_MOLF_m1_sp1_10.1_rev_8	1	0			1	30					28jun18_MOLF_m1	MOLF male	MOLF	male	Mol	M.musculus					0.566037735849057				23	0
21nov17_16nov17_MSM_f3_sp1_18_rev	136	4.0415	0.029771	10	21nov17_16nov17_MSM_f3_sp1_18_rev_10	1	0			1	77					16nov17_MSM_f3	MSM female	MSM	female	Mol	M.musculus					0.566176470588235				59	0
16feb16_17mar16_G_f4_sp1_7_rev	83	4.356	0.052705	4	16feb16_17mar16_G_f4_sp1_7_rev_4	1	0			1	47					17mar16_G_f4	G female	G	female	Dom	M.musculus					0.566265060240964				36	0
27mar16_6mar16_G_m2_sp1_8.1_rev	83	3.8884	0.046648	9	27mar16_6mar16_G_m2_sp1_8.1_rev_9	1	0			1	47					6mar16_G_m2	G male	G	male	Dom	M.musculus					0.566265060240964				36	0
2jul17_20dec16_LEW_m3_sp1_20_rev	83	3.7979	0.045759	5	2jul17_20dec16_LEW_m3_sp1_20_rev_5	1	0			1	47					20dec16_LEW_m3	LEW male	LEW	male	Dom	M.musculus					0.566265060240964				36	0
9aug15_17apr15_PWD_f2_sp1_3.1_rev	83	7.3774	0.089378	8	9aug15_17apr15_PWD_f2_sp1_3.1_rev_8	1	0			1	47					17apr15_PWD_f2	PWD female	PWD	female	Musc	M.musculus					0.566265060240964				36	0
12dec17_18nov17_WSB_f2_sp1_18_rev	83	5.8756	0.070489	18	12dec17_18nov17_WSB_f2_sp1_18_rev_18	1	0			1	47					18nov17_WSB_f2	WSB female	WSB	female	Dom	M.musculus					0.566265060240964				36	0
11jan19_27oct18_SKIVE_m1_sp1_24_rev	113	4.682	0.041464	10	11jan19_27oct18_SKIVE_m1_sp1_24_rev_10	1	0			1	64					27oct18_SKIVE_m1	SKIVE male	SKIVE	male	Musc	M.musculus					0.566371681415929				49	1
11dec17_18nov17_WSB_f1_sp1_6_rev	113	3.5611	0.031558	2	11dec17_18nov17_WSB_f1_sp1_6_rev_2	1	0			1	64					18nov17_WSB_f1	WSB female	WSB	female	Dom	M.musculus					0.566371681415929				49	0
5jun18_21may18_KAZ_m2_sp1_9.2_rev	60	3.4758	0.058027	1	5jun18_21may18_KAZ_m2_sp1_9.2_rev_1	1	0			1	34					21may18_KAZ_m2	KAZ male	KAZ	male	Musc	M.musculus					0.566666666666667				26	0
15mar17_13jan17_LEW_f3_sp1_20_rev	90	1.0959	0.012184	10	15mar17_13jan17_LEW_f3_sp1_20_rev_10	1	0			1	51					13jan17_LEW_f3	LEW female	LEW	female	Dom	M.musculus					0.566666666666667				39	0
2apr15_28feb15_PWD_f3_sp1_1_rev	120	6.5429	0.054605	7	2apr15_28feb15_PWD_f3_sp1_1_rev_7	1	0			1	68					28feb15_PWD_f3	PWD female	PWD	female	Musc	M.musculus					0.566666666666667				52	0
1mar16_20feb16_G_f3_sp1_14_rev	97	4.7858	0.04934	2	1mar16_20feb16_G_f3_sp1_14_rev_2	1	0			1	55					20feb16_G_f3	G female	G	female	Dom	M.musculus					0.56701030927835				42	0
5aug17_14jul17_MSM_f1_sp1_17_rev	97	5.1697	0.053537	12	5aug17_14jul17_MSM_f1_sp1_17_rev_12	1	0			1	55					14jul17_MSM_f1	MSM female	MSM	female	Mol	M.musculus					0.56701030927835				42	0
27mar16_6mar16_G_m3_sp1_15.3_rev	67	5.0405	0.075565	9	27mar16_6mar16_G_m3_sp1_15.3_rev_9	1	0			1	38					6mar16_G_m3	G male	G	male	Dom	M.musculus					0.567164179104478				29	0
13sep18_28jun18_MOLF_m1_sp1_9.2_rev	67	3.6923	0.054866	12	13sep18_28jun18_MOLF_m1_sp1_9.2_rev_12	1	0			1	38					28jun18_MOLF_m1	MOLF male	MOLF	male	Mol	M.musculus					0.567164179104478				29	0
26dec17_18nov17_WSB_f4_sp1_21_rev	104	5.0562	0.048444	12	26dec17_18nov17_WSB_f4_sp1_21_rev_12	1	0			1	59					18nov17_WSB_f4	WSB female	WSB	female	Dom	M.musculus					0.567307692307692				45	0
20jul15_18may15_PWD_m2_sp1_19_rev	74	4.5546	0.061767	1	20jul15_18may15_PWD_m2_sp1_19_rev_1	1	0			1	42					18may15_PWD_m2	PWD male	PWD	male	Musc	M.musculus					0.567567567567568				32	1
16feb18_1feb18_KAZ_f4_sp1_25_rev	132	10.0734	0.076305	2	16feb18_1feb18_KAZ_f4_sp1_25_rev_2	1	0			1	75					1feb18_KAZ_f4	KAZ female	KAZ	female	Musc	M.musculus					0.568181818181818				57	0
7feb18_11jan18_KAZ_m4_sp1_16.1_rev	95	4.3432	0.045894	13	7feb18_11jan18_KAZ_m4_sp1_16.1_rev_13	1	0			1	54					11jan18_KAZ_m4	KAZ male	KAZ	male	Musc	M.musculus					0.568421052631579				41	0
12dec17_18nov17_WSB_f2_sp1_9_rev	95	2.6866	0.028226	4	12dec17_18nov17_WSB_f2_sp1_9_rev_4	1	0			1	54					18nov17_WSB_f2	WSB female	WSB	female	Dom	M.musculus					0.568421052631579				41	0
15mar17_13jan17_LEW_f3_sp1_33_rev	65	3.7288	0.057291	24	15mar17_13jan17_LEW_f3_sp1_33_rev_24	1	0			1	37					13jan17_LEW_f3	LEW female	LEW	female	Dom	M.musculus					0.569230769230769				28	0
13sep18_28jun18_MOLF_m1_sp1_5.1_rev	72	5.6687	0.079039	16	13sep18_28jun18_MOLF_m1_sp1_5.1_rev_16	1	0			1	41					28jun18_MOLF_m1	MOLF male	MOLF	male	Mol	M.musculus					0.569444444444444				31	0
16feb16_17mar16_G_f4_sp1_9_rev	93	9.1239	0.097781	14	16feb16_17mar16_G_f4_sp1_9_rev_14	1	0			1	53					17mar16_G_f4	G female	G	female	Dom	M.musculus					0.56989247311828				40	0
26jan18_11jan18_KAZ_m3_sp1_7_rev	93	4.8906	0.052513	14	26jan18_11jan18_KAZ_m3_sp1_7_rev_14	1	0			1	53					11jan18_KAZ_m3	KAZ male	KAZ	male	Musc	M.musculus					0.56989247311828				40	0
5aug17_14jul17_MSM_f1_sp1_6_rev	107	3.9073	0.03637	3	5aug17_14jul17_MSM_f1_sp1_6_rev_3	1	0			1	61					14jul17_MSM_f1	MSM female	MSM	female	Mol	M.musculus					0.570093457943925				46	0
12may15_30sep14_G_m5_sp1_26_rev	105	9.5652	0.090713	24	12may15_30sep14_G_m5_sp1_26_rev_24	1	0			1	60					30sep14_G_m5	G male	G	male	Dom	M.musculus					0.571428571428571				45	0
16nov16_17mar16_G_f5_sp1_8_rev	112	4.6089	0.041126	3	16nov16_17mar16_G_f5_sp1_8_rev_3	1	0			1	64					17mar16_G_f5	G female	G	female	Dom	M.musculus					0.571428571428571				48	0
24may17_17mar16_G_f5_sp1_11_rev	84	3.3803	0.040159	10	24may17_17mar16_G_f5_sp1_11_rev_10	1	0			1	48					17mar16_G_f5	G female	G	female	Dom	M.musculus					0.571428571428571				36	0
27mar16_6mar16_G_m2_sp1_6.2_rev	98	5.2406	0.053694	11	27mar16_6mar16_G_m2_sp1_6.2_rev_11	1	0			1	56					6mar16_G_m2	G male	G	male	Dom	M.musculus					0.571428571428571				42	0
5jun18_21may18_KAZ_m2_sp1_14_rev	98	5.7068	0.058459	15	5jun18_21may18_KAZ_m2_sp1_14_rev_15	1	0			1	56					21may18_KAZ_m2	KAZ male	KAZ	male	Musc	M.musculus					0.571428571428571				42	0
19jan17_4jan17_LEW_f7_sp1_28_rev	105	2.8125	0.02677	5	19jan17_4jan17_LEW_f7_sp1_28_rev_5	1	0			1	60					4jan17_LEW_f7	LEW female	LEW	female	Dom	M.musculus					0.571428571428571				45	0
21nov17_16nov17_MSM_f3_sp1_4_rev	147	5.2003	0.035336	6	21nov17_16nov17_MSM_f3_sp1_4_rev_6	1	0			1	84					16nov17_MSM_f3	MSM female	MSM	female	Mol	M.musculus					0.571428571428571				63	0
27mar16_6mar16_PWD_m1_sp1_1_rev	70	1.8462	0.026346	4	27mar16_6mar16_PWD_m1_sp1_1_rev_4	1	0			1	40					6mar16_PWD_m1	PWD male	PWD	male	Musc	M.musculus					0.571428571428571				30	1
12dec17_18nov17_WSB_f2_sp1_14_rev	63	1.2121	0.01917	16	12dec17_18nov17_WSB_f2_sp1_14_rev_16	1	0			1	36					18nov17_WSB_f2	WSB female	WSB	female	Dom	M.musculus					0.571428571428571				27	0
26dec17_18nov17_WSB_f4_sp1_1_rev	49	2.7397	0.056329	1	26dec17_18nov17_WSB_f4_sp1_1_rev_1	1	0			1	28					18nov17_WSB_f4	WSB female	WSB	female	Dom	M.musculus					0.571428571428571				21	0
26dec17_18nov17_WSB_f4_sp1_4_rev	98	4.6324	0.047443	16	26dec17_18nov17_WSB_f4_sp1_4_rev_16	1	0			1	56					18nov17_WSB_f4	WSB female	WSB	female	Dom	M.musculus					0.571428571428571				42	0
15mar16_16jan16_G_f1_sp1_1_rev	159	8.6192	0.05418	17	15mar16_16jan16_G_f1_sp1_1_rev_17	1	0			1	91					16jan16_G_f1	G female	G	female	Dom	M.musculus					0.572327044025157				68	0
16feb16_17mar16_G_f4_sp1_9_rev	138	5.1603	0.037365	17	16feb16_17mar16_G_f4_sp1_9_rev_17	1	0			1	79					17mar16_G_f4	G female	G	female	Dom	M.musculus					0.572463768115942				59	0
27jul19_26oct18_SKIVE_f2_sp1_13_rev	110	6.0899	0.055399	19	27jul19_26oct18_SKIVE_f2_sp1_13_rev_19	1	0			1	63					26oct18_SKIVE_f2	SKIVE female	SKIVE	female	Musc	M.musculus					0.5727272727272728				47	0
19jan17_4jan17_LEW_f6_sp1_28_rev	103	3.8934	0.037779	3	19jan17_4jan17_LEW_f6_sp1_28_rev_3	1	0			1	59					4jan17_LEW_f6	LEW female	LEW	female	Dom	M.musculus					0.572815533980582				44	0
5aug17_14jul17_MSM_f1_sp1_25_rev	178	2.9992	0.016805	16	5aug17_14jul17_MSM_f1_sp1_25_rev_16	1	0			1	102					14jul17_MSM_f1	MSM female	MSM	female	Mol	M.musculus					0.573033707865168				76	0
8feb18_1feb18_KAZ_f1_sp1_19_rev	61	2.8125	0.046175	16	8feb18_1feb18_KAZ_f1_sp1_19_rev_16	1	0			1	35					1feb18_KAZ_f1	KAZ female	KAZ	female	Musc	M.musculus					0.573770491803279				26	0
8feb18_1feb18_KAZ_f1_sp1_27_rev	162	4.2408	0.026182	6	8feb18_1feb18_KAZ_f1_sp1_27_rev_6	1	0			1	93					1feb18_KAZ_f1	KAZ female	KAZ	female	Musc	M.musculus					0.574074074074074				69	0
15mar17_13jan17_LEW_f3_sp1_29_rev	108	5.0875	0.046989	14	15mar17_13jan17_LEW_f3_sp1_29_rev_14	1	0			1	62					13jan17_LEW_f3	LEW female	LEW	female	Dom	M.musculus					0.574074074074074				46	0
8feb18_1feb18_KAZ_f1_sp1_19_rev	87	5.6527	0.064661	3	8feb18_1feb18_KAZ_f1_sp1_19_rev_3	1	0			1	50					1feb18_KAZ_f1	KAZ female	KAZ	female	Musc	M.musculus					0.574712643678161				37	0
21nov17_16nov17_MSM_f3_sp1_4_rev	120	9.3535	0.077626	9	21nov17_16nov17_MSM_f3_sp1_4_rev_9	1	0			1	69					16nov17_MSM_f3	MSM female	MSM	female	Mol	M.musculus					0.575				51	0
8feb17_20dec16_LEW_m1_sp1_29_rev	73	3.6801	0.0502	13	8feb17_20dec16_LEW_m1_sp1_29_rev_13	1	0			1	42					20dec16_LEW_m1	LEW male	LEW	male	Dom	M.musculus					0.575342465753425				31	0
29nov17_16nov17_MSM_f1_sp1_1_rev	73	4.4903	0.061119	13	29nov17_16nov17_MSM_f1_sp1_1_rev_13	1	0			1	42					16nov17_MSM_f1	MSM female	MSM	female	Mol	M.musculus					0.575342465753425				31	0
6mar15_1mar15_PWD_m1_sp4_2_rev	73	5.1037	0.069919	15	6mar15_1mar15_PWD_m1_sp4_2_rev_15	1	0			1	42					1mar15_PWD_m1	PWD male	PWD	male	Musc	M.musculus					0.575342465753425				31	1
1mar18_1feb18_KAZ_f3_sp1_2_rev	66	5.44	0.082745	3	1mar18_1feb18_KAZ_f3_sp1_2_rev_3	1	0			1	38					1feb18_KAZ_f3	KAZ female	KAZ	female	Musc	M.musculus					0.575757575757576				28	0
1mar18_1feb18_KAZ_f3_sp1_3_rev	132	5.6975	0.043165	10	1mar18_1feb18_KAZ_f3_sp1_3_rev_10	1	0			1	76					1feb18_KAZ_f3	KAZ female	KAZ	female	Musc	M.musculus					0.575757575757576				56	0
15mar17_13jan17_LEW_f3_sp1_21_rev	99	1.7647	0.017839	9	15mar17_13jan17_LEW_f3_sp1_21_rev_9	1	0			1	57					13jan17_LEW_f3	LEW female	LEW	female	Dom	M.musculus					0.575757575757576				42	0
30jun17_4jan17_LEW_f3_sp1_3_rev	66	1.5152	0.023084	6	30jun17_4jan17_LEW_f3_sp1_3_rev_6	1	0			1	38					4jan17_LEW_f3	LEW female	LEW	female	Dom	M.musculus					0.575757575757576				28	0
2jul17_20dec16_LEW_m2_sp1_5_rev	92	6.2057	0.067512	11	2jul17_20dec16_LEW_m2_sp1_5_rev_11	1	0			1	53					20dec16_LEW_m2	LEW male	LEW	male	Dom	M.musculus					0.576086956521739				39	0
23jul19_28sep18_CZECH_m2_sp1_17_rev	59	5.9341	0.10092	10	23jul19_28sep18_CZECH_m2_sp1_17_rev_10	1	0			1	34					28sep18_CZECH_m2	CZECH male	CZECH	male	Musc	M.musculus					0.576271186440678				25	0
26jan18_11jan18_KAZ_m3_sp1_9.1_rev	85	5.2918	0.062	4	26jan18_11jan18_KAZ_m3_sp1_9.1_rev_4	1	0			1	49					11jan18_KAZ_m3	KAZ male	KAZ	male	Musc	M.musculus					0.576470588235294				36	0
27aug15_12jun15_WSB_m2_sp1_18_rev	85	7.6938	0.090794	19	27aug15_12jun15_WSB_m2_sp1_18_rev_19	1	0			1	49					12jun15_WSB_m2	WSB male	WSB	male	Dom	M.musculus					0.576470588235294				36	0
12dec17_18nov17_WSB_f2_sp1_20_rev	137	11.5501	0.084567	3	12dec17_18nov17_WSB_f2_sp1_20_rev_3	1	0			1	79					18nov17_WSB_f2	WSB female	WSB	female	Dom	M.musculus					0.576642335766423				58	0
5jul15_23apr15_PWD_f1_sp1_16_rev	78	9.0181	0.11495	8	5jul15_23apr15_PWD_f1_sp1_16_rev_8	1	0			1	45					23apr15_PWD_f1	PWD female	PWD	female	Musc	M.musculus					0.576923076923077				33	0
12dec17_18nov17_WSB_f2_sp1_23_rev	78	1.4286	0.018338	5	12dec17_18nov17_WSB_f2_sp1_23_rev_5	1	0			1	45					18nov17_WSB_f2	WSB female	WSB	female	Dom	M.musculus					0.576923076923077				33	0
9aug15_23apr15_PWD_f2_sp1_11_rev	97	2.6866	0.027765	18	9aug15_23apr15_PWD_f2_sp1_11_rev_18	1	0			1	56					23apr15_PWD_f2	PWD female	PWD	female	Musc	M.musculus					0.577319587628866				41	0
18jul19_31may19_SKIVE_m2_sp1_9_rev	97	4.3377	0.044558	16	18jul19_31may19_SKIVE_m2_sp1_9_rev_16	1	0			1	56					31may19_SKIVE_m2	SKIVE male	SKIVE	male	Musc	M.musculus					0.577319587628866				41	1
5jun18_21may18_KAZ_m2_sp1_5.1_rev	71	4.1176	0.058398	9	5jun18_21may18_KAZ_m2_sp1_5.1_rev_9	1	0			1	41					21may18_KAZ_m2	KAZ male	KAZ	male	Musc	M.musculus					0.577464788732394				30	0
5jun18_21may18_KAZ_m2_sp1_10.1_rev	45	8.0977	0.18055	1	5jun18_21may18_KAZ_m2_sp1_10.1_rev_1	1	0			1	26					21may18_KAZ_m2	KAZ male	KAZ	male	Musc	M.musculus					0.577777777777778				19	0
18jul19_1mar19_MOLF_m1_sp1_19.2_rev	45	1.7143	0.038187	10	18jul19_1mar19_MOLF_m1_sp1_19.2_rev_10	1	0			1	26					1mar19_MOLF_m1	MOLF male	MOLF	male	Mol	M.musculus					0.577777777777778				19	0
14dec17_18nov17_WSB_f3_sp1_6_rev	90	4.3077	0.047928	1	14dec17_18nov17_WSB_f3_sp1_6_rev_1	1	0			1	52					18nov17_WSB_f3	WSB female	WSB	female	Dom	M.musculus					0.577777777777778				38	0
8feb17_4jan17_LEW_f1_sp1_4_rev	109	6.4172	0.059032	2	8feb17_4jan17_LEW_f1_sp1_4_rev_2	1	0			1	63					4jan17_LEW_f1	LEW female	LEW	female	Dom	M.musculus					0.577981651376147				46	0
20jul15_18may15_PWD_m1_sp1_17_rev	109	5.3389	0.048772	31	20jul15_18may15_PWD_m1_sp1_17_rev_31	1	0			1	63					18may15_PWD_m1	PWD male	PWD	male	Musc	M.musculus					0.577981651376147				46	1
9apr18_1feb18_LEW_f1_sp1_9_rev	140	6.4612	0.045988	14	9apr18_1feb18_LEW_f1_sp1_9_rev_14	1	0			1	81					1feb18_LEW_f1	LEW female	LEW	female	Dom	M.musculus					0.578571428571429				59	0
23jul19_28sep18_CZECH_m2_sp1_13.2_rev	57	2.2951	0.040263	1	23jul19_28sep18_CZECH_m2_sp1_13.2_rev_1	1	0			1	33					28sep18_CZECH_m2	CZECH male	CZECH	male	Musc	M.musculus					0.578947368421053				24	0
1mar16_20feb16_G_f3_sp1_10_rev	95	5.355	0.056327	9	1mar16_20feb16_G_f3_sp1_10_rev_9	1	0			1	55					20feb16_G_f3	G female	G	female	Dom	M.musculus					0.578947368421053				40	0
1mar16_20feb16_G_f3_sp1_15_rev	95	5.9646	0.062868	9	1mar16_20feb16_G_f3_sp1_15_rev_9	1	0			1	55					20feb16_G_f3	G female	G	female	Dom	M.musculus					0.578947368421053				40	0
8feb17_20dec16_LEW_m1_sp1_19.1_rev	57	4.8847	0.086066	11	8feb17_20dec16_LEW_m1_sp1_19.1_rev_11	1	0			1	33					20dec16_LEW_m1	LEW male	LEW	male	Dom	M.musculus					0.578947368421053				24	0
14dec17_18nov17_WSB_f3_sp1_31_rev	88	5.8465	0.066136	15	14dec17_18nov17_WSB_f3_sp1_31_rev_15	1	0			1	51					18nov17_WSB_f3	WSB female	WSB	female	Dom	M.musculus					0.579545454545455				37	0
14dec17_18nov17_WSB_f3_sp1_26_rev	69	4.808	0.069848	15	14dec17_18nov17_WSB_f3_sp1_26_rev_15	1	0			1	40					18nov17_WSB_f3	WSB female	WSB	female	Dom	M.musculus					0.579710144927536				29	0
11dec17_18nov17_WSB_f1_sp1_20_rev	100	1.194	0.011947	4	11dec17_18nov17_WSB_f1_sp1_20_rev_4	1	0			1	58					18nov17_WSB_f1	WSB female	WSB	female	Dom	M.musculus					0.58				42	0
14dec17_18nov17_WSB_f3_sp1_12_rev	81	2.1875	0.02709	9	14dec17_18nov17_WSB_f3_sp1_12_rev_9	1	0			1	47					18nov17_WSB_f3	WSB female	WSB	female	Dom	M.musculus					0.580246913580247				34	0
8feb17_20dec16_LEW_m1_sp1_22.2_rev	93	3.4783	0.037314	6	8feb17_20dec16_LEW_m1_sp1_22.2_rev_6	1	0			1	54					20dec16_LEW_m1	LEW male	LEW	male	Dom	M.musculus					0.580645161290323				39	0
8feb17_20dec16_LEW_m1_sp1_24.1_rev	105	3.4977	0.033292	5	8feb17_20dec16_LEW_m1_sp1_24.1_rev_5	1	0			1	61					20dec16_LEW_m1	LEW male	LEW	male	Dom	M.musculus					0.580952380952381				44	0
8feb17_20dec16_LEW_m1_sp1_19.1_rev	117	3.7513	0.032188	8	8feb17_20dec16_LEW_m1_sp1_19.1_rev_8	1	0			1	68					20dec16_LEW_m1	LEW male	LEW	male	Dom	M.musculus					0.581196581196581				49	0
12dec17_18nov17_WSB_f2_sp1_24_rev	129	4.2135	0.032672	17	12dec17_18nov17_WSB_f2_sp1_24_rev_17	1	0			1	75					18nov17_WSB_f2	WSB female	WSB	female	Dom	M.musculus					0.581395348837209				54	0
17mar15_10mar15_PWD_m1_sp1_3.1_rev	98	3.8833	0.039727	3	17mar15_10mar15_PWD_m1_sp1_3.1_rev_3	1	0			1	57					10mar15_PWD_m1	PWD male	PWD	male	Musc	M.musculus					0.581632653061224				41	1
26jan18_11jan18_KAZ_m3_sp1_9.1_rev	67	3.4509	0.051479	14	26jan18_11jan18_KAZ_m3_sp1_9.1_rev_14	1	0			1	39					11jan18_KAZ_m3	KAZ male	KAZ	male	Musc	M.musculus					0.582089552238806				28	0
25jul19_28sep18_CZECH_m3_sp1_2.1_rev	79	3.8294	0.048664	1	25jul19_28sep18_CZECH_m3_sp1_2.1_rev_1	1	0			1	46					28sep18_CZECH_m3	CZECH male	CZECH	male	Musc	M.musculus					0.582278481012658				33	0
11mar15_28feb15_PWD_f1_sp1_10.2_rev	79	7.0848	0.089419	15	11mar15_28feb15_PWD_f1_sp1_10.2_rev_15	1	0			1	46					28feb15_PWD_f1	PWD female	PWD	female	Musc	M.musculus					0.582278481012658				33	0
9aug15_17apr15_PWD_f2_sp1_3.2_rev	103	8.0304	0.078308	20	9aug15_17apr15_PWD_f2_sp1_3.2_rev_20	1	0			1	60					17apr15_PWD_f2	PWD female	PWD	female	Musc	M.musculus					0.58252427184466				43	0
16nov16_17mar16_G_f5_sp1_1_rev	115	4.7339	0.041103	4	16nov16_17mar16_G_f5_sp1_1_rev_4	1	0			1	67					17mar16_G_f5	G female	G	female	Dom	M.musculus					0.582608695652174				48	0
5jun18_21may18_KAZ_m2_sp1_2_rev	84	4.8916	0.058303	14	5jun18_21may18_KAZ_m2_sp1_2_rev_14	1	0			1	49					21may18_KAZ_m2	KAZ male	KAZ	male	Musc	M.musculus					0.583333333333333				35	0
19jan17_4jan17_LEW_f6_sp1_23_rev	84	1.7143	0.020343	15	19jan17_4jan17_LEW_f6_sp1_23_rev_15	1	0			1	49					4jan17_LEW_f6	LEW female	LEW	female	Dom	M.musculus					0.583333333333333				35	0
9aug15_23apr15_PWD_f2_sp1_8_rev	96	6.4657	0.067577	12	9aug15_23apr15_PWD_f2_sp1_8_rev_12	1	0			1	56					23apr15_PWD_f2	PWD female	PWD	female	Musc	M.musculus					0.583333333333333				40	0
17mar15_10mar15_PWD_m1_sp1_6_rev	108	2.8571	0.026435	7	17mar15_10mar15_PWD_m1_sp1_6_rev_7	1	0			1	63					10mar15_PWD_m1	PWD male	PWD	male	Musc	M.musculus					0.583333333333333				45	1
10jun19_31may19_SKIVE_f6_sp1_54_rev	72	2.6471	0.036725	18	10jun19_31may19_SKIVE_f6_sp1_54_rev_18	1	0			1	42				faint foci near centromere	31may19_SKIVE_f6	SKIVE female	SKIVE	female	Musc	M.musculus					0.583333333333333				30	0
12dec17_18nov17_WSB_f2_sp1_17_rev	132	5.6186	0.042657	3	12dec17_18nov17_WSB_f2_sp1_17_rev_3	1	0			1	77					18nov17_WSB_f2	WSB female	WSB	female	Dom	M.musculus					0.583333333333333				55	0
14dec17_18nov17_WSB_f3_sp1_22_rev	120	5.7402	0.047685	14	14dec17_18nov17_WSB_f3_sp1_22_rev_14	1	0			1	70					18nov17_WSB_f3	WSB female	WSB	female	Dom	M.musculus					0.583333333333333				50	0
19may15_31mar15_WSB_m1_sp1_8_rev	60	3.2529	0.054027	14	19may15_31mar15_WSB_m1_sp1_8_rev_14	1	0			1	35					31mar15_WSB_m1	WSB male	WSB	male	Dom	M.musculus					0.583333333333333				25	0
16nov16_17mar16_G_f5_sp1_5_rev	101	2.5714	0.025338	4	16nov16_17mar16_G_f5_sp1_5_rev_4	1	0			1	59					17mar16_G_f5	G female	G	female	Dom	M.musculus					0.584158415841584				42	0
11dec17_18nov17_WSB_f1_sp1_2_rev	89	6.3113	0.070855	2	11dec17_18nov17_WSB_f1_sp1_2_rev_2	1	0			1	52					18nov17_WSB_f1	WSB female	WSB	female	Dom	M.musculus					0.584269662921348				37	0
10jun19_31may19_SKIVE_f6_sp1_54_rev	65	4.4143	0.068036	16	10jun19_31may19_SKIVE_f6_sp1_54_rev_16	1	0			1	38					31may19_SKIVE_f6	SKIVE female	SKIVE	female	Musc	M.musculus					0.584615384615385				27	0
11dec17_18nov17_WSB_f1_sp1_4_rev	65	0.63492	0.0097994	15	11dec17_18nov17_WSB_f1_sp1_4_rev_15	1	0			1	38					18nov17_WSB_f1	WSB female	WSB	female	Dom	M.musculus					0.584615384615385				27	0
1mar16_20feb16_G_f3_sp1_8_rev	159	6.6258	0.041707	4	1mar16_20feb16_G_f3_sp1_8_rev_4	1	0			1	93					20feb16_G_f3	G female	G	female	Dom	M.musculus					0.584905660377358				66	0
12dec17_18nov17_WSB_f2_sp1_7_rev	94	1.9718	0.020972	16	12dec17_18nov17_WSB_f2_sp1_7_rev_16	1	0			1	55					18nov17_WSB_f2	WSB female	WSB	female	Dom	M.musculus					0.585106382978723				39	0
2jul17_20dec16_LEW_m2_sp1_15_rev	41	6.126	0.15027	7	2jul17_20dec16_LEW_m2_sp1_15_rev_7	1	0			1	24					20dec16_LEW_m2	LEW male	LEW	male	Dom	M.musculus					0.585365853658537				17	0
23jul19_28sep18_CZECH_m2_sp1_17_rev	70	6.6075	0.09407	12	23jul19_28sep18_CZECH_m2_sp1_17_rev_12	1	0			1	41					28sep18_CZECH_m2	CZECH male	CZECH	male	Musc	M.musculus					0.585714285714286				29	0
19oct15_12oct15_G_m1_sp1_9_rev	99	4.432	0.044924	5	19oct15_12oct15_G_m1_sp1_9_rev_5	1	0			1	58					12oct15_G_m1	G male	G	male	Dom	M.musculus					0.585858585858586				41	0
11dec17_18nov17_WSB_f1_sp1_11_rev	99	4.058	0.040904	12	11dec17_18nov17_WSB_f1_sp1_11_rev_12	1	0			1	58					18nov17_WSB_f1	WSB female	WSB	female	Dom	M.musculus					0.585858585858586				41	0
16nov16_17mar16_G_f5_sp1_5_rev	87	4.1935	0.048023	2	16nov16_17mar16_G_f5_sp1_5_rev_2	1	0			1	51					17mar16_G_f5	G female	G	female	Dom	M.musculus					0.586206896551724				36	0
1oct16_1apr16_G_m4_sp1_2_rev	87	3.7143	0.042702	3	1oct16_1apr16_G_m4_sp1_2_rev_3	1	0			1	51					1apr16_G_m4	G male	G	male	Dom	M.musculus					0.586206896551724				36	0
26jan18_11jan18_KAZ_m3_sp1_21_rev	87	3.1458	0.036028	17	26jan18_11jan18_KAZ_m3_sp1_21_rev_17	1	0			1	51					11jan18_KAZ_m3	KAZ male	KAZ	male	Musc	M.musculus					0.586206896551724				36	0
19jan17_4jan17_LEW_f6_sp1_18_rev	58	0.30769	0.0053058	17	19jan17_4jan17_LEW_f6_sp1_18_rev_17	1	0			1	34					4jan17_LEW_f6	LEW female	LEW	female	Dom	M.musculus					0.586206896551724				24	0
19jan17_4jan17_LEW_f6_sp1_35_rev	87	0.88235	0.010106	6	19jan17_4jan17_LEW_f6_sp1_35_rev_6	1	0			1	51					4jan17_LEW_f6	LEW female	LEW	female	Dom	M.musculus					0.586206896551724				36	0
19jan17_4jan17_LEW_f6_sp1_39_rev	58	4.4128	0.075951	4	19jan17_4jan17_LEW_f6_sp1_39_rev_4	1	0			1	34					4jan17_LEW_f6	LEW female	LEW	female	Dom	M.musculus					0.586206896551724				24	0
8jun15_23apr15_PWD_f2_sp1_15_rev	116	1.6901	0.014573	16	8jun15_23apr15_PWD_f2_sp1_15_rev_16	1	0			1	68					23apr15_PWD_f2	PWD female	PWD	female	Musc	M.musculus					0.586206896551724				48	0
20may15_17apr15_PWD_f4_sp1_25_rev	87	4.3052	0.049648	16	20may15_17apr15_PWD_f4_sp1_25_rev_16	1	0			1	51					17apr15_PWD_f4	PWD female	PWD	female	Musc	M.musculus					0.586206896551724				36	0
10apr15_31mar15_WSB_m1_sp1_7_rev	58	2.1212	0.036404	2	10apr15_31mar15_WSB_m1_sp1_7_rev_2	1	0			1	34					31mar15_WSB_m1	WSB male	WSB	male	Dom	M.musculus					0.586206896551724				24	0
21nov17_16nov17_MSM_f3_sp1_19_rev	133	5.4465	0.040884	13	21nov17_16nov17_MSM_f3_sp1_19_rev_13	1	0			1	78					16nov17_MSM_f3	MSM female	MSM	female	Mol	M.musculus					0.586466165413534				55	0
11dec17_18nov17_WSB_f1_sp1_16_rev	133	6.0303	0.045506	1	11dec17_18nov17_WSB_f1_sp1_16_rev_1	1	0			1	78				foci pretty faint	18nov17_WSB_f1	WSB female	WSB	female	Dom	M.musculus					0.586466165413534				55	0
24may17_17mar16_G_f5_sp1_9_rev	104	3.676	0.035463	15	24may17_17mar16_G_f5_sp1_9_rev_15	1	0			1	61					17mar16_G_f5	G female	G	female	Dom	M.musculus					0.586538461538462				43	0
10jun19_31may19_SKIVE_f6_sp1_30_rev	104	2.2581	0.021613	4	10jun19_31may19_SKIVE_f6_sp1_30_rev_4	1	0			1	61					31may19_SKIVE_f6	SKIVE female	SKIVE	female	Musc	M.musculus					0.586538461538462				43	0
27jul19_26oct18_SKIVE_f2_sp1_3.1_rev	75	2.6866	0.035854	27	27jul19_26oct18_SKIVE_f2_sp1_3.1_rev_27	1	0			1	44					26oct18_SKIVE_f2	SKIVE female	SKIVE	female	Musc	M.musculus					0.5866666666666667				31	0
13sep18_28jun18_MOLF_m1_sp1_26_rev	75	3.0303	0.04044	2	13sep18_28jun18_MOLF_m1_sp1_26_rev_2	1	0			1	44					28jun18_MOLF_m1	MOLF male	MOLF	male	Mol	M.musculus					0.586666666666667				31	0
27jul19_26oct18_SKIVE_f1_sp1_25_rev	46	4.2451	0.09136	23	27jul19_26oct18_SKIVE_f1_sp1_25_rev_23	1	0			1	27					26oct18_SKIVE_f1	SKIVE female	SKIVE	female	Musc	M.musculus					0.5869565217391305				19	0
12dec17_18nov17_WSB_f2_sp1_23_rev	63	2.6667	0.042014	1	12dec17_18nov17_WSB_f2_sp1_23_rev_1	1	0			1	37					18nov17_WSB_f2	WSB female	WSB	female	Dom	M.musculus					0.587301587301587				26	0
8jun15_23apr15_PWD_f2_sp1_20_rev	80	3.7782	0.047132	1	8jun15_23apr15_PWD_f2_sp1_20_rev_1	1	0			1	47					23apr15_PWD_f2	PWD female	PWD	female	Musc	M.musculus					0.5875				33	0
13sep18_28jun18_MOLF_m1_sp1_25.1_rev	97	4.9622	0.051013	4	13sep18_28jun18_MOLF_m1_sp1_25.1_rev_4	1	0			1	57					28jun18_MOLF_m1	MOLF male	MOLF	male	Mol	M.musculus					0.587628865979381				40	0
20may15_17apr15_PWD_f4_sp1_20_rev	97	4.3525	0.044885	18	20may15_17apr15_PWD_f4_sp1_20_rev_18	1	0			1	57					17apr15_PWD_f4	PWD female	PWD	female	Musc	M.musculus					0.587628865979381				40	0
11dec17_18nov17_WSB_f1_sp1_7_rev	131	8.8202	0.067567	13	11dec17_18nov17_WSB_f1_sp1_7_rev_13	1	0			1	77					18nov17_WSB_f1	WSB female	WSB	female	Dom	M.musculus					0.587786259541985				54	0
10jun15_24mar15_G_m1_sp1_25_rev	51	4.6364	0.090997	3	10jun15_24mar15_G_m1_sp1_25_rev_3	1	0			1	30					24mar15_G_m1	G male	G	male	Dom	M.musculus					0.588235294117647				21	0
24may17_17mar16_G_f5_sp1_9_rev	136	5.0452	0.036976	3	24may17_17mar16_G_f5_sp1_9_rev_3	1	0			1	80					17mar16_G_f5	G female	G	female	Dom	M.musculus					0.588235294117647				56	0
18jul19_1mar19_MOLF_m1_sp1_21.1_rev	68	8.381	0.12288	4	18jul19_1mar19_MOLF_m1_sp1_21.1_rev_4	1	0			1	40					1mar19_MOLF_m1	MOLF male	MOLF	male	Mol	M.musculus					0.588235294117647				28	0
29nov17_16nov17_MSM_f1_sp1_17_rev	85	4.4434	0.05242	8	29nov17_16nov17_MSM_f1_sp1_17_rev_8	1	0			1	50					16nov17_MSM_f1	MSM female	MSM	female	Mol	M.musculus					0.588235294117647				35	0
10jun19_31may19_SKIVE_f6_sp1_59.1_rev	68	7.923	0.11733	6	10jun19_31may19_SKIVE_f6_sp1_59.1_rev_6	1	0			1	40					31may19_SKIVE_f6	SKIVE female	SKIVE	female	Musc	M.musculus					0.588235294117647				28	0
8feb18_1feb18_KAZ_f1_sp1_8_rev	107	5.2433	0.049009	1	8feb18_1feb18_KAZ_f1_sp1_8_rev_1	1	0			1	63					1feb18_KAZ_f1	KAZ female	KAZ	female	Musc	M.musculus					0.588785046728972				44	0
20may15_17apr15_PWD_f4_sp1_5_rev	90	8.1486	0.090814	18	20may15_17apr15_PWD_f4_sp1_5_rev_18	1	0			1	53					17apr15_PWD_f4	PWD female	PWD	female	Musc	M.musculus					0.588888888888889				37	0
12dec17_18nov17_WSB_f2_sp1_5_rev	90	2.3881	0.026593	5	12dec17_18nov17_WSB_f2_sp1_5_rev_5	1	0			1	53					18nov17_WSB_f2	WSB female	WSB	female	Dom	M.musculus					0.588888888888889				37	0
10jun19_31may19_SKIVE_f6_sp1_54_rev	73	9.153	0.12568	17	10jun19_31may19_SKIVE_f6_sp1_54_rev_17	1	0			1	43					31may19_SKIVE_f6	SKIVE female	SKIVE	female	Musc	M.musculus					0.589041095890411				30	0
27mar16_6mar16_G_m3_sp1_10.2_rev	112	5.337	0.047689	10	27mar16_6mar16_G_m3_sp1_10.2_rev_10	1	0			1	66					6mar16_G_m3	G male	G	male	Dom	M.musculus					0.589285714285714				46	0
8feb18_1feb18_KAZ_f1_sp1_11_rev	112	6.9332	0.062153	2	8feb18_1feb18_KAZ_f1_sp1_11_rev_2	1	0			1	66					1feb18_KAZ_f1	KAZ female	KAZ	female	Musc	M.musculus					0.589285714285714				46	0
27jul19_26oct18_SKIVE_f1_sp1_22_rev	95	5.9936	0.062782	22	27jul19_26oct18_SKIVE_f1_sp1_22_rev_22	1	0			1	56					26oct18_SKIVE_f1	SKIVE female	SKIVE	female	Musc	M.musculus					0.5894736842105263				39	0
27jul19_26oct18_SKIVE_f1_sp1_24_rev	95	3.3774	0.035471	8	27jul19_26oct18_SKIVE_f1_sp1_24_rev_8	1	0			1	56					26oct18_SKIVE_f1	SKIVE female	SKIVE	female	Musc	M.musculus					0.5894736842105263				39	0
8feb18_1feb18_KAZ_f1_sp1_3_rev	78	2.7119	0.034911	2	8feb18_1feb18_KAZ_f1_sp1_3_rev_2	1	0			1	46					1feb18_KAZ_f1	KAZ female	KAZ	female	Musc	M.musculus					0.58974358974359				32	0
13sep18_28jun18_MOLF_m1_sp1_20_rev	78	3.7383	0.048078	20	13sep18_28jun18_MOLF_m1_sp1_20_rev_20	1	0			1	46					28jun18_MOLF_m1	MOLF male	MOLF	male	Mol	M.musculus					0.58974358974359				32	0
8feb18_1feb18_KAZ_f1_sp1_11_rev	100	3.0303	0.030293	19	8feb18_1feb18_KAZ_f1_sp1_11_rev_19	1	0			1	59					1feb18_KAZ_f1	KAZ female	KAZ	female	Musc	M.musculus					0.59				41	0
8feb18_1feb18_KAZ_f1_sp1_22_rev	144	4.0803	0.028416	12	8feb18_1feb18_KAZ_f1_sp1_22_rev_12	1	0			1	85					1feb18_KAZ_f1	KAZ female	KAZ	female	Musc	M.musculus					0.590277777777778				59	0
8feb17_20dec16_LEW_m1_sp1_29_rev	83	4.2409	0.051038	12	8feb17_20dec16_LEW_m1_sp1_29_rev_12	1	0			1	49					20dec16_LEW_m1	LEW male	LEW	male	Dom	M.musculus					0.590361445783133				34	0
27aug15_12jun15_WSB_m2_sp1_6_rev	83	6.1499	0.074436	8	27aug15_12jun15_WSB_m2_sp1_6_rev_8	1	0			1	49					12jun15_WSB_m2	WSB male	WSB	male	Dom	M.musculus					0.590361445783133				34	0
27jul19_26oct18_SKIVE_f1_sp1_23_rev	66	2.9364	0.044159	17	27jul19_26oct18_SKIVE_f1_sp1_23_rev_17	1	0			1	39					26oct18_SKIVE_f1	SKIVE female	SKIVE	female	Musc	M.musculus					0.5909090909090909				27	0
17nov16_17mar16_G_f1_sp1_14_rev	88	7.9818	0.091062	13	17nov16_17mar16_G_f1_sp1_14_rev_13	1	0			1	52					17mar16_G_f1	G female	G	female	Dom	M.musculus					0.590909090909091				36	0
6mar18_1feb18_LEW_m1_sp1_20.2_rev	66	2.6866	0.040418	5	6mar18_1feb18_LEW_m1_sp1_20.2_rev_5	1	0			1	39					1feb18_LEW_m1	LEW male	LEW	male	Dom	M.musculus					0.590909090909091				27	0
12dec17_18nov17_WSB_f2_sp1_14_rev	66	1.3699	0.020666	11	12dec17_18nov17_WSB_f2_sp1_14_rev_11	1	0			1	39					18nov17_WSB_f2	WSB female	WSB	female	Dom	M.musculus					0.590909090909091				27	0
26dec17_18nov17_WSB_f4_sp1_4_rev	110	3.0164	0.027486	13	26dec17_18nov17_WSB_f4_sp1_4_rev_13	1	0			1	65					18nov17_WSB_f4	WSB female	WSB	female	Dom	M.musculus					0.590909090909091				45	0
12oct18_26sep18_CZECH_m1_sp1_26_rev	71	3.8889	0.055066	7	12oct18_26sep18_CZECH_m1_sp1_26_rev_7	1	0			1	42					26sep18_CZECH_m1	CZECH male	CZECH	male	Musc	M.musculus					0.591549295774648				29	0
6mar18_1feb18_LEW_m1_sp1_4.1_rev	71	3.7547	0.052901	3	6mar18_1feb18_LEW_m1_sp1_4.1_rev_3	1	0			1	42					1feb18_LEW_m1	LEW male	LEW	male	Dom	M.musculus					0.591549295774648				29	0
16nov16_17mar16_G_f5_sp1_1_rev	120	5.1852	0.043247	11	16nov16_17mar16_G_f5_sp1_1_rev_11	1	0			1	71					17mar16_G_f5	G female	G	female	Dom	M.musculus					0.591666666666667				49	0
3mar15_13jan17_LEW_m1_sp1_23_rev	49	7.0452	0.14371	2	3mar15_13jan17_LEW_m1_sp1_23_rev_2	1	0			1	29					13jan17_LEW_m1	LEW male	LEW	male	Dom	M.musculus					0.591836734693878				20	0
30jun17_4jan17_LEW_f3_sp1_1_rev	76	4.0353	0.053402	19	30jun17_4jan17_LEW_f3_sp1_1_rev_19	1	0			1	45					4jan17_LEW_f3	LEW female	LEW	female	Dom	M.musculus					0.592105263157895				31	0
2jul17_20dec16_LEW_m3_sp1_3_rev	81	6.6999	0.082792	7	2jul17_20dec16_LEW_m3_sp1_3_rev_7	1	0			1	48					20dec16_LEW_m3	LEW male	LEW	male	Dom	M.musculus					0.592592592592593				33	0
4dec17_16nov17_MSM_f2_sp1_4.2_rev	140	5.7083	0.040672	13	4dec17_16nov17_MSM_f2_sp1_4.2_rev_13	1	0			1	83					16nov17_MSM_f2	MSM female	MSM	female	Mol	M.musculus					0.592857142857143				57	0
11dec17_18nov17_WSB_f1_sp1_9_rev	118	6.1479	0.052171	1	11dec17_18nov17_WSB_f1_sp1_9_rev_1	1	0			1	70					18nov17_WSB_f1	WSB female	WSB	female	Dom	M.musculus					0.593220338983051				48	0
8feb17_20dec16_LEW_m1_sp1_1_rev	91	4.8034	0.05282	13	8feb17_20dec16_LEW_m1_sp1_1_rev_13	1	0			1	54					20dec16_LEW_m1	LEW male	LEW	male	Dom	M.musculus					0.593406593406593				37	0
15mar17_13jan17_LEW_f3_sp1_33_rev	96	1.4706	0.015315	2	15mar17_13jan17_LEW_f3_sp1_33_rev_2	1	0			1	57					13jan17_LEW_f3	LEW female	LEW	female	Dom	M.musculus					0.59375				39	0
27jul19_26oct18_SKIVE_f1_sp1_22_rev	69	3.7805	0.055146	18	27jul19_26oct18_SKIVE_f1_sp1_22_rev_18	1	0			1	41					26oct18_SKIVE_f1	SKIVE female	SKIVE	female	Musc	M.musculus					0.5942028985507246				28	0
10jun15_24mar15_G_m1_sp1_25_rev	69	2.7482	0.039581	14	10jun15_24mar15_G_m1_sp1_25_rev_14	1	0			1	41					24mar15_G_m1	G male	G	male	Dom	M.musculus					0.594202898550725				28	0
10jan18_13jan17_LEW_f1_sp1_16_rev	143	2.5225	0.017614	9	10jan18_13jan17_LEW_f1_sp1_16_rev_9	1	0			1	85					13jan17_LEW_f1	LEW female	LEW	female	Dom	M.musculus					0.594405594405594				58	0
16feb18_1feb18_KAZ_f4_sp1_4_rev	111	4.1935	0.037924	10	16feb18_1feb18_KAZ_f4_sp1_4_rev_10	1	0			1	66					1feb18_KAZ_f4	KAZ female	KAZ	female	Musc	M.musculus					0.594594594594595				45	0
17mar15_10mar15_PWD_m1_sp1_8_rev	79	4.0417	0.051166	10	17mar15_10mar15_PWD_m1_sp1_8_rev_10	1	0			1	47					10mar15_PWD_m1	PWD male	PWD	male	Musc	M.musculus					0.594936708860759				32	1
10jun19_31may19_SKIVE_f6_sp1_30_rev	121	5.099	0.042094	5	10jun19_31may19_SKIVE_f6_sp1_30_rev_5	1	0			1	72					31may19_SKIVE_f6	SKIVE female	SKIVE	female	Musc	M.musculus					0.59504132231405				49	0
4jun19_28sep18_MOLF_m1_sp1_27.2_rev	84	3.9764	0.047304	10	4jun19_28sep18_MOLF_m1_sp1_27.2_rev_10	1	0			1	50					28sep18_MOLF_m1	MOLF male	MOLF	male	Mol	M.musculus					0.595238095238095				34	0
21nov17_16nov17_MSM_f3_sp1_14_rev	84	4.2456	0.050819	9	21nov17_16nov17_MSM_f3_sp1_14_rev_9	1	0			1	50					16nov17_MSM_f3	MSM female	MSM	female	Mol	M.musculus					0.595238095238095				34	0
12dec17_18nov17_WSB_f2_sp1_22_rev	84	4.8112	0.05739	3	12dec17_18nov17_WSB_f2_sp1_22_rev_3	1	0			1	50					18nov17_WSB_f2	WSB female	WSB	female	Dom	M.musculus					0.595238095238095				34	0
27jul19_26oct18_SKIVE_f2_sp1_26_rev	84	3.871	0.046306	5	27jul19_26oct18_SKIVE_f2_sp1_26_rev_5	1	0			1	50					26oct18_SKIVE_f2	SKIVE female	SKIVE	female	Musc	M.musculus					0.5952380952380952				34	0
4dec17_16nov17_MSM_f2_sp1_5_rev	131	5.0022	0.038284	6	4dec17_16nov17_MSM_f2_sp1_5_rev_6	1	0			1	78					16nov17_MSM_f2	MSM female	MSM	female	Mol	M.musculus					0.595419847328244				53	0
15mar17_13jan17_LEW_f3_sp1_3_rev	99	3.2749	0.033112	5	15mar17_13jan17_LEW_f3_sp1_3_rev_5	1	0			1	59				2 faint flanking foci	13jan17_LEW_f3	LEW female	LEW	female	Dom	M.musculus					0.595959595959596				40	0
16nov16_17mar16_G_f5_sp1_1_rev	104	4.4935	0.043163	5	16nov16_17mar16_G_f5_sp1_1_rev_5	1	0			1	62					17mar16_G_f5	G female	G	female	Dom	M.musculus					0.596153846153846				42	0
27mar16_6mar16_G_m3_sp1_15.1_rev	109	2.7692	0.025472	9	27mar16_6mar16_G_m3_sp1_15.1_rev_9	1	0			1	65					6mar16_G_m3	G male	G	male	Dom	M.musculus					0.596330275229358				44	0
26jan18_11jan18_KAZ_m3_sp1_1_rev	114	8.0473	0.070877	11	26jan18_11jan18_KAZ_m3_sp1_1_rev_11	1	0			1	68					11jan18_KAZ_m3	KAZ male	KAZ	male	Musc	M.musculus					0.596491228070175				46	0
5aug17_14jul17_MSM_f1_sp1_6_rev	171	3.6477	0.021366	8	5aug17_14jul17_MSM_f1_sp1_6_rev_8	1	0			1	102					14jul17_MSM_f1	MSM female	MSM	female	Mol	M.musculus					0.596491228070175				69	0
7feb18_11jan18_KAZ_m4_sp1_25_rev	62	5.0796	0.082101	7	7feb18_11jan18_KAZ_m4_sp1_25_rev_7	1	0			1	37					11jan18_KAZ_m4	KAZ male	KAZ	male	Musc	M.musculus					0.596774193548387				25	0
8feb17_17mar16_G_f5_sp1_9_rev	72	6.2278	0.08637	9	8feb17_17mar16_G_f5_sp1_9_rev_9	1	0			1	43					17mar16_G_f5	G female	G	female	Dom	M.musculus					0.597222222222222				29	0
6mar15_1mar15_PWD_m1_sp4_8_rev	77	3.4155	0.044177	16	6mar15_1mar15_PWD_m1_sp4_8_rev_16	1	0			1	46					1mar15_PWD_m1	PWD male	PWD	male	Musc	M.musculus					0.597402597402597				31	1
23jul19_28sep18_CZECH_m2_sp1_23_rev	82	5.1346	0.062842	12	23jul19_28sep18_CZECH_m2_sp1_23_rev_12	1	0			1	49					28sep18_CZECH_m2	CZECH male	CZECH	male	Musc	M.musculus					0.597560975609756				33	0
26dec17_18nov17_WSB_f4_sp1_1_rev	82	6.1569	0.075297	11	26dec17_18nov17_WSB_f4_sp1_1_rev_11	1	0			1	49					18nov17_WSB_f4	WSB female	WSB	female	Dom	M.musculus					0.597560975609756				33	0
7feb18_11jan18_KAZ_m4_sp1_19_rev	87	4.2059	0.048435	18	7feb18_11jan18_KAZ_m4_sp1_19_rev_18	1	0			1	52					11jan18_KAZ_m4	KAZ male	KAZ	male	Musc	M.musculus					0.597701149425287				35	0
8jun15_23apr15_PWD_f2_sp1_16_rev	97	6.1721	0.063461	15	8jun15_23apr15_PWD_f2_sp1_16_rev_15	1	0			1	58					23apr15_PWD_f2	PWD female	PWD	female	Musc	M.musculus					0.597938144329897				39	0
12dec17_18nov17_WSB_f2_sp1_4_rev	97	4.4686	0.046061	7	12dec17_18nov17_WSB_f2_sp1_4_rev_7	1	0			1	58					18nov17_WSB_f2	WSB female	WSB	female	Dom	M.musculus					0.597938144329897				39	0
6mar18_1feb18_LEW_m1_sp1_13_rev	117	4.5935	0.039346	6	6mar18_1feb18_LEW_m1_sp1_13_rev_6	1	0			1	70					1feb18_LEW_m1	LEW male	LEW	male	Dom	M.musculus					0.598290598290598				47	0
26jan18_11jan18_KAZ_m3_sp1_5_rev	127	2.2857	0.017931	4	26jan18_11jan18_KAZ_m3_sp1_5_rev_4	1	0			1	76					11jan18_KAZ_m3	KAZ male	KAZ	male	Musc	M.musculus					0.598425196850394				51	0
6jun18_13jan17_LEW_f2_sp1_11_rev	127	7.9317	0.062466	2	6jun18_13jan17_LEW_f2_sp1_11_rev_2	1	0			1	76					13jan17_LEW_f2	LEW female	LEW	female	Dom	M.musculus					0.598425196850394				51	0
19oct15_12oct15_G_m1_sp1_10_rev	50	5.189	0.10418	6	19oct15_12oct15_G_m1_sp1_10_rev_6	1	0			1	30					12oct15_G_m1	G male	G	male	Dom	M.musculus					0.6				20	0
27mar16_6mar16_G_m3_sp1_15.1_rev	75	3.3846	0.045077	1	27mar16_6mar16_G_m3_sp1_15.1_rev_1	1	0			1	45					6mar16_G_m3	G male	G	male	Dom	M.musculus					0.6				30	0
8feb18_1feb18_KAZ_f1_sp1_17_rev	115	4.0845	0.035658	18	8feb18_1feb18_KAZ_f1_sp1_17_rev_18	1	0			1	69					1feb18_KAZ_f1	KAZ female	KAZ	female	Musc	M.musculus					0.6				46	0
7feb18_11jan18_KAZ_m4_sp1_24_rev	80	4.5455	0.056749	1	7feb18_11jan18_KAZ_m4_sp1_24_rev_1	1	0			1	48					11jan18_KAZ_m4	KAZ male	KAZ	male	Musc	M.musculus					0.6				32	0
19jan17_4jan17_LEW_f7_sp1_28_rev	105	3.8806	0.036975	17	19jan17_4jan17_LEW_f7_sp1_28_rev_17	1	0			1	63					4jan17_LEW_f7	LEW female	LEW	female	Dom	M.musculus					0.6				42	0
21nov17_16nov17_MSM_f3_sp1_9_rev	100	4.429	0.04443	18	21nov17_16nov17_MSM_f3_sp1_9_rev_18	1	0			1	60					16nov17_MSM_f3	MSM female	MSM	female	Mol	M.musculus					0.6				40	0
5aug17_14jul17_MSM_f1_sp1_8_rev	65	2.6812	0.041215	9	5aug17_14jul17_MSM_f1_sp1_8_rev_9	1	0			1	39					14jul17_MSM_f1	MSM female	MSM	female	Mol	M.musculus					0.6				26	0
20jul15_18may15_PWD_m1_sp1_17_rev	70	3.1071	0.044557	23	20jul15_18may15_PWD_m1_sp1_17_rev_23	1	0			1	42					18may15_PWD_m1	PWD male	PWD	male	Musc	M.musculus					0.6				28	1
22mar15_10mar15_PWD_m1_sp1_5.1_rev	55	6.2987	0.11433	8	22mar15_10mar15_PWD_m1_sp1_5.1_rev_8	1	0			1	33					10mar15_PWD_m1	PWD male	PWD	male	Musc	M.musculus					0.6				22	1
10jun19_31may19_SKIVE_f6_sp1_10_rev	130	3.0556	0.023422	10	10jun19_31may19_SKIVE_f6_sp1_10_rev_10	1	0			1	78					31may19_SKIVE_f6	SKIVE female	SKIVE	female	Musc	M.musculus					0.6				52	0
10jun19_31may19_SKIVE_f6_sp1_57_rev	90	0.95238	0.010606	2	10jun19_31may19_SKIVE_f6_sp1_57_rev_2	1	0			1	54					31may19_SKIVE_f6	SKIVE female	SKIVE	female	Musc	M.musculus					0.6				36	0
5jan19_27oct18_SKIVE_m2_sp1_13_rev	75	4.3357	0.057756	13	5jan19_27oct18_SKIVE_m2_sp1_13_rev_13	1	0			1	45					27oct18_SKIVE_m2	SKIVE male	SKIVE	male	Musc	M.musculus					0.6				30	1
27aug15_12jun15_WSB_m2_sp1_18_rev	45	5.3512	0.11809	3	27aug15_12jun15_WSB_m2_sp1_18_rev_3	1	0			1	27					12jun15_WSB_m2	WSB male	WSB	male	Dom	M.musculus					0.6				18	0
10jun19_31may19_SKIVE_f6_sp1_48_rev	143	4.6529	0.032472	12	10jun19_31may19_SKIVE_f6_sp1_48_rev_12	1	0			1	86					31may19_SKIVE_f6	SKIVE female	SKIVE	female	Musc	M.musculus					0.601398601398601				57	0
17nov16_17mar16_G_f1_sp1_9_rev	128	4.1422	0.032383	6	17nov16_17mar16_G_f1_sp1_9_rev_6	1	0			1	77					17mar16_G_f1	G female	G	female	Dom	M.musculus					0.6015625				51	0
12oct18_26sep18_CZECH_m1_sp1_10_rev	113	7.6443	0.067731	9	12oct18_26sep18_CZECH_m1_sp1_10_rev_9	1	0			1	68					26sep18_CZECH_m1	CZECH male	CZECH	male	Musc	M.musculus					0.601769911504425				45	0
9aug15_23apr15_PWD_f2_sp1_11_rev	108	5.3347	0.04955	8	9aug15_23apr15_PWD_f2_sp1_11_rev_8	1	0			1	65					23apr15_PWD_f2	PWD female	PWD	female	Musc	M.musculus					0.601851851851852				43	0
2jul17_20dec16_LEW_m3_sp1_21_rev	93	2.5	0.026739	11	2jul17_20dec16_LEW_m3_sp1_21_rev_11	1	0			1	56					20dec16_LEW_m3	LEW male	LEW	male	Dom	M.musculus					0.602150537634409				37	0
27aug15_12jun15_WSB_m2_sp1_18_rev	88	4.0186	0.045812	11	27aug15_12jun15_WSB_m2_sp1_18_rev_11	1	0			1	53					12jun15_WSB_m2	WSB male	WSB	male	Dom	M.musculus					0.602272727272727				35	0
14dec17_18nov17_WSB_f3_sp1_18_rev	78	3.2353	0.041694	13	14dec17_18nov17_WSB_f3_sp1_18_rev_13	1	0			1	47					18nov17_WSB_f3	WSB female	WSB	female	Dom	M.musculus					0.602564102564103				31	0
10jun19_31may19_SKIVE_f6_sp1_10_rev	73	3.0303	0.041788	22	10jun19_31may19_SKIVE_f6_sp1_10_rev_22	1	0			1	44					31may19_SKIVE_f6	SKIVE female	SKIVE	female	Musc	M.musculus					0.602739726027397				29	0
10jun19_31may19_SKIVE_f6_sp1_54_rev	68	1.2308	0.018184	19	10jun19_31may19_SKIVE_f6_sp1_54_rev_19	1	0			1	41					31may19_SKIVE_f6	SKIVE female	SKIVE	female	Musc	M.musculus					0.602941176470588				27	0
7feb18_11jan18_KAZ_m4_sp1_16.1_rev	63	3.3846	0.053954	16	7feb18_11jan18_KAZ_m4_sp1_16.1_rev_16	1	0			1	38					11jan18_KAZ_m4	KAZ male	KAZ	male	Musc	M.musculus					0.603174603174603				25	0
6mar18_1feb18_LEW_m1_sp1_1_rev	63	4.5397	0.072055	10	6mar18_1feb18_LEW_m1_sp1_1_rev_10	1	0			1	38					1feb18_LEW_m1	LEW male	LEW	male	Dom	M.musculus					0.603174603174603				25	0
4jun19_28sep18_MOLF_m1_sp1_10.1_rev	63	2.5397	0.040171	13	4jun19_28sep18_MOLF_m1_sp1_10.1_rev_13	1	0			1	38					28sep18_MOLF_m1	MOLF male	MOLF	male	Mol	M.musculus					0.603174603174603				25	0
11dec17_18nov17_WSB_f1_sp1_2_rev	58	4.2905	0.074021	12	11dec17_18nov17_WSB_f1_sp1_2_rev_12	1	0			1	35					18nov17_WSB_f1	WSB female	WSB	female	Dom	M.musculus					0.603448275862069				23	0
12jul15_12jun15_WSB_m1_sp1_10.2_rev	53	5.5973	0.10497	18	12jul15_12jun15_WSB_m1_sp1_10.2_rev_18	1	0			1	32					12jun15_WSB_m1	WSB male	WSB	male	Dom	M.musculus					0.60377358490566				21	0
19oct15_12oct15_G_m1_sp1_9_rev	101	6.4511	0.063989	7	19oct15_12oct15_G_m1_sp1_9_rev_7	1	0			1	61					12oct15_G_m1	G male	G	male	Dom	M.musculus					0.603960396039604				40	0
12oct18_26sep18_CZECH_m1_sp1_11_rev	96	5.2748	0.055053	10	12oct18_26sep18_CZECH_m1_sp1_11_rev_10	1	0			1	58					26sep18_CZECH_m1	CZECH male	CZECH	male	Musc	M.musculus					0.604166666666667				38	0
7feb18_11jan18_KAZ_m4_sp1_2_rev	48	3.9764	0.082186	5	7feb18_11jan18_KAZ_m4_sp1_2_rev_5	1	0			1	29					11jan18_KAZ_m4	KAZ male	KAZ	male	Musc	M.musculus					0.604166666666667				19	0
19jan17_4jan17_LEW_f7_sp1_6_rev	96	2.3188	0.02421	8	19jan17_4jan17_LEW_f7_sp1_6_rev_8	1	0			1	58					4jan17_LEW_f7	LEW female	LEW	female	Dom	M.musculus					0.604166666666667				38	0
15mar16_16jan16_G_f1_sp1_9_rev	91	3.5941	0.039632	7	15mar16_16jan16_G_f1_sp1_9_rev_7	1	0			1	55					16jan16_G_f1	G female	G	female	Dom	M.musculus					0.604395604395604				36	0
17feb15_13oct14_G_f2_sp1_3_rev	81	4.485	0.055356	14	17feb15_13oct14_G_f2_sp1_3_rev_14	1	0			1	49					13oct14_G_f2	G female	G	female	Dom	M.musculus					0.604938271604938				32	0
14dec17_18nov17_WSB_f3_sp1_9_rev	81	5.5509	0.068159	13	14dec17_18nov17_WSB_f3_sp1_9_rev_13	1	0			1	49					18nov17_WSB_f3	WSB female	WSB	female	Dom	M.musculus					0.604938271604938				32	0
7feb18_11jan18_KAZ_m4_sp1_10_rev	76	7.2865	0.09612	15	7feb18_11jan18_KAZ_m4_sp1_10_rev_15	1	0			1	46					11jan18_KAZ_m4	KAZ male	KAZ	male	Musc	M.musculus					0.605263157894737				30	0
12may15_30sep14_G_m5_sp1_2_rev	66	1.9178	0.029234	10	12may15_30sep14_G_m5_sp1_2_rev_10	1	0			1	40					30sep14_G_m5	G male	G	male	Dom	M.musculus					0.606060606060606				26	0
13sep18_28jun18_MOLF_m1_sp1_12.1_rev	94	7.5692	0.080605	3	13sep18_28jun18_MOLF_m1_sp1_12.1_rev_3	1	0			1	57					28jun18_MOLF_m1	MOLF male	MOLF	male	Mol	M.musculus					0.606382978723404				37	0
10jun19_31may19_SKIVE_f6_sp1_30_rev	56	4.978	0.088769	18	10jun19_31may19_SKIVE_f6_sp1_30_rev_18	1	0			1	34					31may19_SKIVE_f6	SKIVE female	SKIVE	female	Musc	M.musculus					0.607142857142857				22	0
10jun15_18may15_WSB_m1_sp1_4_rev	56	1.4925	0.026649	14	10jun15_18may15_WSB_m1_sp1_4_rev_14	1	0			1	34					18may15_WSB_m1	WSB male	WSB	male	Dom	M.musculus					0.607142857142857				22	0
9aug15_17apr15_PWD_f2_sp1_21_rev	79	6.2219	0.079004	14	9aug15_17apr15_PWD_f2_sp1_21_rev_14	1	0			1	48					17apr15_PWD_f2	PWD female	PWD	female	Musc	M.musculus					0.607594936708861				31	0
11dec17_18nov17_WSB_f1_sp1_14_rev	79	4.388	0.055347	2	11dec17_18nov17_WSB_f1_sp1_14_rev_2	1	0			1	48					18nov17_WSB_f1	WSB female	WSB	female	Dom	M.musculus					0.607594936708861				31	0
5aug17_14jul17_MSM_f1_sp1_13_rev	102	6.1794	0.060735	9	5aug17_14jul17_MSM_f1_sp1_13_rev_9	1	0			1	62					14jul17_MSM_f1	MSM female	MSM	female	Mol	M.musculus					0.607843137254902				40	0
8jun15_23apr15_PWD_f2_sp1_1_rev	102	14.3241	0.14054	14	8jun15_23apr15_PWD_f2_sp1_1_rev_14	1	0			1	62					23apr15_PWD_f2	PWD female	PWD	female	Musc	M.musculus					0.607843137254902				40	0
12feb15_13oct14_G_f2_sp1_3_rev	138	8.8281	0.064152	9	12feb15_13oct14_G_f2_sp1_3_rev_9	1	0			1	84					13oct14_G_f2	G female	G	female	Dom	M.musculus					0.608695652173913				54	0
10jun19_31may19_SKIVE_f6_sp1_43_rev	133	1.8462	0.013852	3	10jun19_31may19_SKIVE_f6_sp1_43_rev_3	1	0			1	81					31may19_SKIVE_f6	SKIVE female	SKIVE	female	Musc	M.musculus					0.609022556390977				52	0
26dec17_18nov17_WSB_f4_sp1_6_rev	87	3.3333	0.03839	8	26dec17_18nov17_WSB_f4_sp1_6_rev_8	1	0			1	53					18nov17_WSB_f4	WSB female	WSB	female	Dom	M.musculus					0.609195402298851				34	0
27mar16_6mar16_G_m3_sp1_1_rev	64	2.9851	0.046287	10	27mar16_6mar16_G_m3_sp1_1_rev_10	1	0			1	39					6mar16_G_m3	G male	G	male	Dom	M.musculus					0.609375				25	0
15mar17_13jan17_LEW_f3_sp1_13_rev	64	3.3384	0.051987	8	15mar17_13jan17_LEW_f3_sp1_13_rev_8	1	0			1	39					13jan17_LEW_f3	LEW female	LEW	female	Dom	M.musculus					0.609375				25	0
15mar17_13jan17_LEW_f3_sp1_9_rev	64	5.2449	0.082515	8	15mar17_13jan17_LEW_f3_sp1_9_rev_8	1	0			1	39					13jan17_LEW_f3	LEW female	LEW	female	Dom	M.musculus					0.609375				25	0
27jul19_26oct18_SKIVE_f1_sp1_22_rev	64	4.9128	0.077161	20	27jul19_26oct18_SKIVE_f1_sp1_22_rev_20	1	0			1	39					26oct18_SKIVE_f1	SKIVE female	SKIVE	female	Musc	M.musculus					0.609375				25	0
12oct18_26sep18_CZECH_m1_sp1_26_rev	82	5	0.061153	9	12oct18_26sep18_CZECH_m1_sp1_26_rev_9	1	0			1	50					26sep18_CZECH_m1	CZECH male	CZECH	male	Musc	M.musculus					0.609756097560976				32	0
12may15_30sep14_G_m5_sp1_11_rev	123	3.4971	0.028318	10	12may15_30sep14_G_m5_sp1_11_rev_10	1	0			1	75				2 faint flanking foci	30sep14_G_m5	G male	G	male	Dom	M.musculus					0.609756097560976				48	0
16feb16_17mar16_G_f4_sp1_10_rev	82	9.0461	0.11017	9	16feb16_17mar16_G_f4_sp1_10_rev_9	1	0			1	50					17mar16_G_f4	G female	G	female	Dom	M.musculus					0.609756097560976				32	0
18jul19_1mar19_MOLF_m1_sp1_17_rev	82	5.9225	0.072251	6	18jul19_1mar19_MOLF_m1_sp1_17_rev_6	1	0			1	50					1mar19_MOLF_m1	MOLF male	MOLF	male	Mol	M.musculus					0.609756097560976				32	0
10jun19_31may19_SKIVE_f6_sp1_60_rev	100	6.5731	0.065585	7	10jun19_31may19_SKIVE_f6_sp1_60_rev_7	1	0			1	61					31may19_SKIVE_f6	SKIVE female	SKIVE	female	Musc	M.musculus					0.61				39	0
16nov16_17mar16_G_f5_sp1_8_rev	118	6.7457	0.057048	14	16nov16_17mar16_G_f5_sp1_8_rev_14	1	0			1	72					17mar16_G_f5	G female	G	female	Dom	M.musculus					0.610169491525424				46	0
5jun18_21may18_KAZ_m2_sp1_3_rev	59	5.0169	0.084414	15	5jun18_21may18_KAZ_m2_sp1_3_rev_15	1	0			1	36					21may18_KAZ_m2	KAZ male	KAZ	male	Musc	M.musculus					0.610169491525424				23	0
16feb16_17mar16_G_f4_sp1_8_rev	77	6.8584	0.089041	22	16feb16_17mar16_G_f4_sp1_8_rev_22	1	0			1	47				might be asynapsis	17mar16_G_f4	G female	G	female	Dom	M.musculus					0.61038961038961				30	0
14dec17_18nov17_WSB_f3_sp1_14_rev	77	3.4783	0.045269	18	14dec17_18nov17_WSB_f3_sp1_14_rev_18	1	0			1	47					18nov17_WSB_f3	WSB female	WSB	female	Dom	M.musculus					0.61038961038961				30	0
12oct18_26sep18_CZECH_m1_sp1_10_rev	95	6.0248	0.063171	2	12oct18_26sep18_CZECH_m1_sp1_10_rev_2	1	0			1	58					26sep18_CZECH_m1	CZECH male	CZECH	male	Musc	M.musculus					0.610526315789474				37	0
17feb15_13oct14_G_f2_sp1_3_rev	95	2.5714	0.026975	9	17feb15_13oct14_G_f2_sp1_3_rev_9	1	0			1	58					13oct14_G_f2	G female	G	female	Dom	M.musculus					0.610526315789474				37	0
27mar16_6mar16_PWD_m1_sp1_5_rev	95	8.493	0.089571	3	27mar16_6mar16_PWD_m1_sp1_5_rev_3	1	0			1	58					6mar16_PWD_m1	PWD male	PWD	male	Musc	M.musculus					0.610526315789474				37	1
16feb16_17mar16_G_f4_sp1_5_rev	90	2.5676	0.028652	21	16feb16_17mar16_G_f4_sp1_5_rev_21	1	0			1	55					17mar16_G_f4	G female	G	female	Dom	M.musculus					0.611111111111111				35	0
13sep18_28jun18_MOLF_m1_sp1_13.1_rev	90	3.038	0.033689	7	13sep18_28jun18_MOLF_m1_sp1_13.1_rev_7	1	0			1	55					28jun18_MOLF_m1	MOLF male	MOLF	male	Mol	M.musculus					0.611111111111111				35	0
8feb17_17mar16_G_f5_sp1_9_rev	121	5.0741	0.041838	3	8feb17_17mar16_G_f5_sp1_9_rev_3	1	0			1	74					17mar16_G_f5	G female	G	female	Dom	M.musculus					0.611570247933884				47	0
12dec17_18nov17_WSB_f2_sp1_4_rev	103	2.3338	0.022585	9	12dec17_18nov17_WSB_f2_sp1_4_rev_9	1	0			1	63					18nov17_WSB_f2	WSB female	WSB	female	Dom	M.musculus					0.611650485436893				40	0
9aug15_23apr15_PWD_f2_sp1_4_rev	170	10.1009	0.059363	28	9aug15_23apr15_PWD_f2_sp1_4_rev_28	1	0			1	104					23apr15_PWD_f2	PWD female	PWD	female	Musc	M.musculus					0.611764705882353				66	0
11jan19_27oct18_SKIVE_m1_sp1_6_rev	85	3.3803	0.03988	10	11jan19_27oct18_SKIVE_m1_sp1_6_rev_10	1	0			1	52					27oct18_SKIVE_m1	SKIVE male	SKIVE	male	Musc	M.musculus					0.611764705882353				33	1
29nov17_16nov17_MSM_f1_sp1_19_rev	165	3.4783	0.021082	5	29nov17_16nov17_MSM_f1_sp1_19_rev_5	1	0			1	101					16nov17_MSM_f1	MSM female	MSM	female	Mol	M.musculus					0.612121212121212				64	0
12may15_30sep14_G_m5_sp1_15.2_rev	98	5.8398	0.059476	12	12may15_30sep14_G_m5_sp1_15.2_rev_12	1	0			1	60					30sep14_G_m5	G male	G	male	Dom	M.musculus					0.612244897959184				38	0
15mar17_13jan17_LEW_f3_sp1_29_rev	111	6.5574	0.059324	16	15mar17_13jan17_LEW_f3_sp1_29_rev_16	1	0			1	68					13jan17_LEW_f3	LEW female	LEW	female	Dom	M.musculus					0.612612612612613				43	0
5aug17_14jul17_MSM_f1_sp1_26_rev	111	4.4725	0.040248	17	5aug17_14jul17_MSM_f1_sp1_26_rev_17	1	0			1	68					14jul17_MSM_f1	MSM female	MSM	female	Mol	M.musculus					0.612612612612613				43	0
16feb16_17mar16_G_f4_sp1_1_rev	142	5.2589	0.036921	8	16feb16_17mar16_G_f4_sp1_1_rev_8	1	0			1	87					17mar16_G_f4	G female	G	female	Dom	M.musculus					0.612676056338028				55	0
22mar15_10mar15_PWD_m1_sp1_9_rev	62	4.0736	0.065659	3	22mar15_10mar15_PWD_m1_sp1_9_rev_3	1	0			1	38					10mar15_PWD_m1	PWD male	PWD	male	Musc	M.musculus					0.612903225806452				24	1
11jan19_27oct18_SKIVE_m1_sp1_24_rev	75	5.1748	0.06885	11	11jan19_27oct18_SKIVE_m1_sp1_24_rev_11	1	0			1	46					27oct18_SKIVE_m1	SKIVE male	SKIVE	male	Musc	M.musculus					0.613333333333333				29	1
11dec17_18nov17_WSB_f1_sp1_25_rev	75	4.3147	0.057871	18	11dec17_18nov17_WSB_f1_sp1_25_rev_18	1	0			1	46					18nov17_WSB_f1	WSB female	WSB	female	Dom	M.musculus					0.613333333333333				29	0
16feb18_1feb18_KAZ_f4_sp1_25_rev	132	4.6403	0.035126	9	16feb18_1feb18_KAZ_f4_sp1_25_rev_9	1	0			1	81					1feb18_KAZ_f4	KAZ female	KAZ	female	Musc	M.musculus					0.613636363636364				51	0
15mar17_13jan17_LEW_f3_sp1_1_rev	88	2.4242	0.027441	12	15mar17_13jan17_LEW_f3_sp1_1_rev_12	1	0			1	54					13jan17_LEW_f3	LEW female	LEW	female	Dom	M.musculus					0.613636363636364				34	0
12jul15_12jun15_WSB_m1_sp1_14_rev	114	9.1234	0.079787	1	12jul15_12jun15_WSB_m1_sp1_14_rev_1	1	0			1	70					12jun15_WSB_m1	WSB male	WSB	male	Dom	M.musculus					0.614035087719298				44	0
12may15_30sep14_G_m5_sp1_11_rev	70	2.4615	0.035231	6	12may15_30sep14_G_m5_sp1_11_rev_6	1	0			1	43					30sep14_G_m5	G male	G	male	Dom	M.musculus					0.614285714285714				27	0
1oct16_1apr16_G_m4_sp1_7_rev	70	7.3171	0.10412	14	1oct16_1apr16_G_m4_sp1_7_rev_14	1	0			1	43					1apr16_G_m4	G male	G	male	Dom	M.musculus					0.614285714285714				27	0
5jun18_21may18_KAZ_m2_sp1_12_rev	70	3.5821	0.051518	19	5jun18_21may18_KAZ_m2_sp1_12_rev_19	1	0			1	43					21may18_KAZ_m2	KAZ male	KAZ	male	Musc	M.musculus					0.614285714285714				27	0
6mar18_1feb18_LEW_m1_sp1_8.1_rev	70	4.9564	0.071126	14	6mar18_1feb18_LEW_m1_sp1_8.1_rev_14	1	0			1	43					1feb18_LEW_m1	LEW male	LEW	male	Dom	M.musculus					0.614285714285714				27	0
4jun19_28sep18_MOLF_m1_sp1_23_rev	70	5.4819	0.078497	1	4jun19_28sep18_MOLF_m1_sp1_23_rev_1	1	0			1	43					28sep18_MOLF_m1	MOLF male	MOLF	male	Mol	M.musculus					0.614285714285714				27	0
11jan19_27oct18_SKIVE_m1_sp1_23.1_rev	70	5.1298	0.073378	4	11jan19_27oct18_SKIVE_m1_sp1_23.1_rev_4	1	0			1	43					27oct18_SKIVE_m1	SKIVE male	SKIVE	male	Musc	M.musculus					0.614285714285714				27	1
12may15_30sep14_G_m5_sp1_2_rev	96	2.7692	0.028833	12	12may15_30sep14_G_m5_sp1_2_rev_12	1	0			1	59					30sep14_G_m5	G male	G	male	Dom	M.musculus					0.614583333333333				37	0
27mar16_6mar16_G_m1_sp1_1_rev	96	3.334	0.034585	15	27mar16_6mar16_G_m1_sp1_1_rev_15	1	0			1	59					6mar16_G_m1	G male	G	male	Dom	M.musculus					0.614583333333333				37	0
19jan17_4jan17_LEW_f6_sp1_25_rev	96	4.5	0.046852	27	19jan17_4jan17_LEW_f6_sp1_25_rev_27	1	0			1	59					4jan17_LEW_f6	LEW female	LEW	female	Dom	M.musculus					0.614583333333333				37	0
11dec17_18nov17_WSB_f1_sp1_2_rev	96	1.3699	0.014316	17	11dec17_18nov17_WSB_f1_sp1_2_rev_17	1	0			1	59					18nov17_WSB_f1	WSB female	WSB	female	Dom	M.musculus					0.614583333333333				37	0
10jun15_18may15_WSB_m1_sp1_13_rev	39	4.9505	0.12764	2	10jun15_18may15_WSB_m1_sp1_13_rev_2	1	0			1	24					18may15_WSB_m1	WSB male	WSB	male	Dom	M.musculus					0.615384615384615				15	0
27jul19_26oct18_SKIVE_f2_sp1_40_rev	78	2.0896	0.026917	9	27jul19_26oct18_SKIVE_f2_sp1_40_rev_9	1	0			1	48					26oct18_SKIVE_f2	SKIVE female	SKIVE	female	Musc	M.musculus					0.6153846153846154				30	0
11dec17_18nov17_WSB_f1_sp1_14_rev	86	3.5821	0.041632	9	11dec17_18nov17_WSB_f1_sp1_14_rev_9	1	0			1	53					18nov17_WSB_f1	WSB female	WSB	female	Dom	M.musculus					0.616279069767442				33	0
11dec17_18nov17_WSB_f1_sp1_4_rev	86	4.2211	0.049021	8	11dec17_18nov17_WSB_f1_sp1_4_rev_8	1	0			1	53					18nov17_WSB_f1	WSB female	WSB	female	Dom	M.musculus					0.616279069767442				33	0
5jun18_21may18_KAZ_m2_sp1_15.2_rev	73	3.6676	0.049981	22	5jun18_21may18_KAZ_m2_sp1_15.2_rev_22	1	0			1	45					21may18_KAZ_m2	KAZ male	KAZ	male	Musc	M.musculus					0.616438356164384				28	0
27aug15_12jun15_WSB_m2_sp1_1.1_rev	107	5.3788	0.050346	11	27aug15_12jun15_WSB_m2_sp1_1.1_rev_11	1	0			1	66					12jun15_WSB_m2	WSB male	WSB	male	Dom	M.musculus					0.616822429906542				41	0
27jul19_26oct18_SKIVE_f1_sp1_22_rev	94	6.2395	0.066612	17	27jul19_26oct18_SKIVE_f1_sp1_22_rev_17	1	0			1	58					26oct18_SKIVE_f1	SKIVE female	SKIVE	female	Musc	M.musculus					0.6170212765957447				36	0
26dec17_18nov17_WSB_f4_sp1_16_rev	81	2.4324	0.030144	2	26dec17_18nov17_WSB_f4_sp1_16_rev_2	1	0			1	50					18nov17_WSB_f4	WSB female	WSB	female	Dom	M.musculus					0.617283950617284				31	0
1mar16_20feb16_G_f3_sp1_18_rev	149	7.3874	0.049714	9	1mar16_20feb16_G_f3_sp1_18_rev_9	1	0			1	92					20feb16_G_f3	G female	G	female	Dom	M.musculus					0.61744966442953				57	0
13sep18_28jun18_MOLF_m1_sp1_10.1_rev	68	6.1151	0.0898	19	13sep18_28jun18_MOLF_m1_sp1_10.1_rev_19	1	0			1	42					28jun18_MOLF_m1	MOLF male	MOLF	male	Mol	M.musculus					0.617647058823529				26	0
14dec17_18nov17_WSB_f3_sp1_9_rev	102	4.3478	0.042438	10	14dec17_18nov17_WSB_f3_sp1_9_rev_10	1	0			1	63					18nov17_WSB_f3	WSB female	WSB	female	Dom	M.musculus					0.617647058823529				39	0
27mar16_6mar16_G_m3_sp1_14_rev	55	4.6377	0.084546	10	27mar16_6mar16_G_m3_sp1_14_rev_10	1	0			1	34					6mar16_G_m3	G male	G	male	Dom	M.musculus					0.618181818181818				21	0
5jun18_21may18_KAZ_m2_sp1_4_rev	55	5.2715	0.095287	2	5jun18_21may18_KAZ_m2_sp1_4_rev_2	1	0			1	34					21may18_KAZ_m2	KAZ male	KAZ	male	Musc	M.musculus					0.618181818181818				21	0
27mar16_6mar16_G_m2_sp1_3.1_rev	76	3.8165	0.049928	1	27mar16_6mar16_G_m2_sp1_3.1_rev_1	1	0			1	47					6mar16_G_m2	G male	G	male	Dom	M.musculus					0.618421052631579				29	0
8feb18_1feb18_KAZ_f1_sp1_11_rev	76	2.0588	0.027113	9	8feb18_1feb18_KAZ_f1_sp1_11_rev_9	1	0			1	47					1feb18_KAZ_f1	KAZ female	KAZ	female	Musc	M.musculus					0.618421052631579				29	0
13sep18_28jun18_MOLF_m1_sp1_12.1_rev	76	2.8936	0.038039	11	13sep18_28jun18_MOLF_m1_sp1_12.1_rev_11	1	0			1	47					28jun18_MOLF_m1	MOLF male	MOLF	male	Mol	M.musculus					0.618421052631579				29	0
12jul15_12jun15_WSB_m1_sp1_9.2_rev	76	5.5096	0.072535	2	12jul15_12jun15_WSB_m1_sp1_9.2_rev_2	1	0			1	47					12jun15_WSB_m1	WSB male	WSB	male	Dom	M.musculus					0.618421052631579				29	0
4dec17_16nov17_MSM_f2_sp1_32_rev	181	9.4486	0.052306	2	4dec17_16nov17_MSM_f2_sp1_32_rev_2	1	0			1	112					16nov17_MSM_f2	MSM female	MSM	female	Mol	M.musculus					0.61878453038674				69	0
22jul19_26oct18_SKIVE_f3_sp1_12.1_rev	105	6.0194	0.057329	20	22jul19_26oct18_SKIVE_f3_sp1_12.1_rev_20	1	0			1	65					26oct18_SKIVE_f3	SKIVE female	SKIVE	female	Musc	M.musculus					0.6190476190476191				40	0
25jul19_28sep18_CZECH_m3_sp1_2.1_rev	50	3.9106	0.078803	5	25jul19_28sep18_CZECH_m3_sp1_2.1_rev_5	1	0			1	31					28sep18_CZECH_m3	CZECH male	CZECH	male	Musc	M.musculus					0.62				19	0
10jun19_31may19_SKIVE_f6_sp1_43_rev	50	4.681	0.093195	23	10jun19_31may19_SKIVE_f6_sp1_43_rev_23	1	0			1	31					31may19_SKIVE_f6	SKIVE female	SKIVE	female	Musc	M.musculus					0.62				19	0
12dec17_18nov17_WSB_f2_sp1_12_rev	79	2.6866	0.033901	11	12dec17_18nov17_WSB_f2_sp1_12_rev_11	1	0			1	49					18nov17_WSB_f2	WSB female	WSB	female	Dom	M.musculus					0.620253164556962				30	0
26dec17_18nov17_WSB_f4_sp1_14_rev	79	2.2951	0.029222	15	26dec17_18nov17_WSB_f4_sp1_14_rev_15	1	0			1	49					18nov17_WSB_f4	WSB female	WSB	female	Dom	M.musculus					0.620253164556962				30	0
16feb18_1feb18_KAZ_f4_sp1_18_rev	87	4.7782	0.054823	19	16feb18_1feb18_KAZ_f4_sp1_18_rev_19	1	0			1	54					1feb18_KAZ_f4	KAZ female	KAZ	female	Musc	M.musculus					0.620689655172414				33	0
12dec17_18nov17_WSB_f2_sp1_3_rev	58	5.4046	0.092458	8	12dec17_18nov17_WSB_f2_sp1_3_rev_8	1	0			1	36					18nov17_WSB_f2	WSB female	WSB	female	Dom	M.musculus					0.620689655172414				22	0
13apr15_31mar15_WSB_m2_sp1_18_rev	87	3.7595	0.043036	9	13apr15_31mar15_WSB_m2_sp1_18_rev_9	1	0			1	54				2nd faint foci	31mar15_WSB_m2	WSB male	WSB	male	Dom	M.musculus					0.620689655172414				33	0
16feb16_17mar16_G_f4_sp1_5_rev	95	1.4706	0.015523	7	16feb16_17mar16_G_f4_sp1_5_rev_7	1	0			1	59					17mar16_G_f4	G female	G	female	Dom	M.musculus					0.621052631578947				36	0
12dec17_18nov17_WSB_f2_sp1_6_rev	95	0.89552	0.0094431	11	12dec17_18nov17_WSB_f2_sp1_6_rev_11	1	0			1	59					18nov17_WSB_f2	WSB female	WSB	female	Dom	M.musculus					0.621052631578947				36	0
4dec17_16nov17_MSM_f2_sp1_11_rev	66	4.3359	0.065282	10	4dec17_16nov17_MSM_f2_sp1_11_rev_10	1	0			1	41					16nov17_MSM_f2	MSM female	MSM	female	Mol	M.musculus					0.621212121212121				25	0
12dec17_18nov17_WSB_f2_sp1_18_rev	66	4.0845	0.061566	16	12dec17_18nov17_WSB_f2_sp1_18_rev_16	1	0			1	41					18nov17_WSB_f2	WSB female	WSB	female	Dom	M.musculus					0.621212121212121				25	0
14dec17_18nov17_WSB_f3_sp1_9_rev	66	4.1176	0.062384	2	14dec17_18nov17_WSB_f3_sp1_9_rev_2	1	0			1	41					18nov17_WSB_f3	WSB female	WSB	female	Dom	M.musculus					0.621212121212121				25	0
14dec17_18nov17_WSB_f3_sp1_27_rev	103	3.0986	0.029986	15	14dec17_18nov17_WSB_f3_sp1_27_rev_15	1	0			1	64					18nov17_WSB_f3	WSB female	WSB	female	Dom	M.musculus					0.621359223300971				39	0
9aug15_23apr15_PWD_f2_sp1_7_rev	140	7.2976	0.052064	1	9aug15_23apr15_PWD_f2_sp1_7_rev_1	1	0			1	87					23apr15_PWD_f2	PWD female	PWD	female	Musc	M.musculus					0.621428571428571				53	0
27jul19_26oct18_SKIVE_f1_sp1_15.2_rev	74	4.5868	0.062209	18	27jul19_26oct18_SKIVE_f1_sp1_15.2_rev_18	1	0			1	46					26oct18_SKIVE_f1	SKIVE female	SKIVE	female	Musc	M.musculus					0.6216216216216216				28	0
5jun18_21may18_KAZ_m2_sp1_15.2_rev	74	3.7302	0.050561	4	5jun18_21may18_KAZ_m2_sp1_15.2_rev_4	1	0			1	46					21may18_KAZ_m2	KAZ male	KAZ	male	Musc	M.musculus					0.621621621621622				28	0
11dec17_18nov17_WSB_f1_sp1_10_rev	82	7.0196	0.086003	10	11dec17_18nov17_WSB_f1_sp1_10_rev_10	1	0			1	51					18nov17_WSB_f1	WSB female	WSB	female	Dom	M.musculus					0.621951219512195				31	0
27jul19_26oct18_SKIVE_f2_sp1_3.2_rev	82	3.1711	0.038817	16	27jul19_26oct18_SKIVE_f2_sp1_3.2_rev_16	1	0			1	51					26oct18_SKIVE_f2	SKIVE female	SKIVE	female	Musc	M.musculus					0.6219512195121951				31	0
15mar17_13jan17_LEW_f3_sp1_29_rev	90	3.6923	0.041168	4	15mar17_13jan17_LEW_f3_sp1_29_rev_4	1	0			1	56					13jan17_LEW_f3	LEW female	LEW	female	Dom	M.musculus					0.622222222222222				34	0
6mar18_1feb18_LEW_m1_sp1_13_rev	45	4.047	0.090511	19	6mar18_1feb18_LEW_m1_sp1_13_rev_19	1	0			1	28					1feb18_LEW_m1	LEW male	LEW	male	Dom	M.musculus					0.622222222222222				17	0
9aug15_23apr15_PWD_f2_sp1_6_rev	90	6.4911	0.07192	14	9aug15_23apr15_PWD_f2_sp1_6_rev_14	1	0			1	56					23apr15_PWD_f2	PWD female	PWD	female	Musc	M.musculus					0.622222222222222				34	0
8feb18_1feb18_KAZ_f1_sp1_12_rev	98	4.3302	0.04397	13	8feb18_1feb18_KAZ_f1_sp1_12_rev_13	1	0			1	61					1feb18_KAZ_f1	KAZ female	KAZ	female	Musc	M.musculus					0.622448979591837				37	0
2jul17_20dec16_LEW_m2_sp1_10_rev	98	6.0479	0.061545	14	2jul17_20dec16_LEW_m2_sp1_10_rev_14	1	0			1	61					20dec16_LEW_m2	LEW male	LEW	male	Dom	M.musculus					0.622448979591837				37	0
8jun15_23apr15_PWD_f2_sp1_20_rev	53	2.403	0.045509	7	8jun15_23apr15_PWD_f2_sp1_20_rev_7	1	0			1	33					23apr15_PWD_f2	PWD female	PWD	female	Musc	M.musculus					0.622641509433962				20	0
11jan19_27oct18_SKIVE_m1_sp1_16.2_rev	106	2.7778	0.026271	5	11jan19_27oct18_SKIVE_m1_sp1_16.2_rev_5	1	0			1	66					27oct18_SKIVE_m1	SKIVE male	SKIVE	male	Musc	M.musculus					0.622641509433962				40	1
11dec17_18nov17_WSB_f1_sp1_2_rev	114	4.4378	0.038931	9	11dec17_18nov17_WSB_f1_sp1_2_rev_9	1	0			1	71					18nov17_WSB_f1	WSB female	WSB	female	Dom	M.musculus					0.62280701754386				43	0
24may17_17mar16_G_f5_sp1_19_rev	122	4.6984	0.038463	10	24may17_17mar16_G_f5_sp1_19_rev_10	1	0			1	76					17mar16_G_f5	G female	G	female	Dom	M.musculus					0.622950819672131				46	0
20may15_17apr15_PWD_f4_sp1_4_rev	130	10.6765	0.081984	16	20may15_17apr15_PWD_f4_sp1_4_rev_16	1	0			1	81					17apr15_PWD_f4	PWD female	PWD	female	Musc	M.musculus					0.623076923076923				49	0
16nov16_17mar16_G_f5_sp1_1_rev	77	5.8797	0.076279	16	16nov16_17mar16_G_f5_sp1_1_rev_16	1	0			1	48					17mar16_G_f5	G female	G	female	Dom	M.musculus					0.623376623376623				29	0
[truncated: 8,214 more rows]
