# Supplementary material
Source: publisher figshare collection journal article supplement (https://gsajournals.figshare.com/articles/dataset/_/13281512)
Supplement: Supplementary file 2 [file 1]

Bivalent Class ■ 0CO ■ 1CO ■ 2CO ■ 3CO ■ 4CO

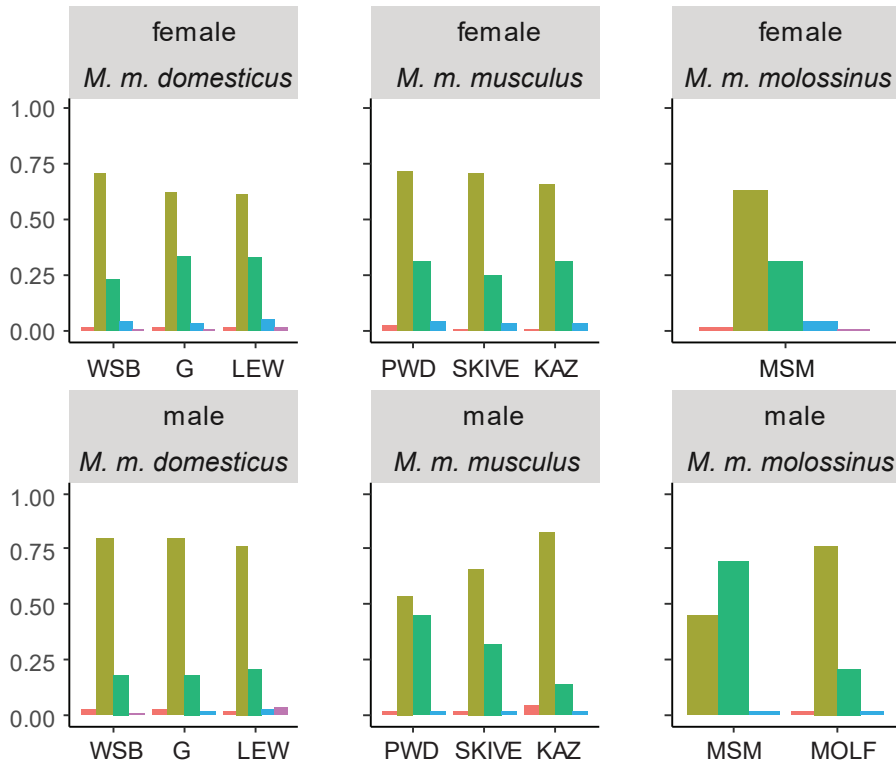

**Supplemental Figure 3. Proportions of Bivalents with Different Numbers of MLH1 Foci. Strain names are abbreviated for space.**
