# Supplementary material
Source: publisher figshare collection journal article supplement (https://gsajournals.figshare.com/articles/dataset/_/13281512)
Supplement: Supplementary file 3 [file 1]

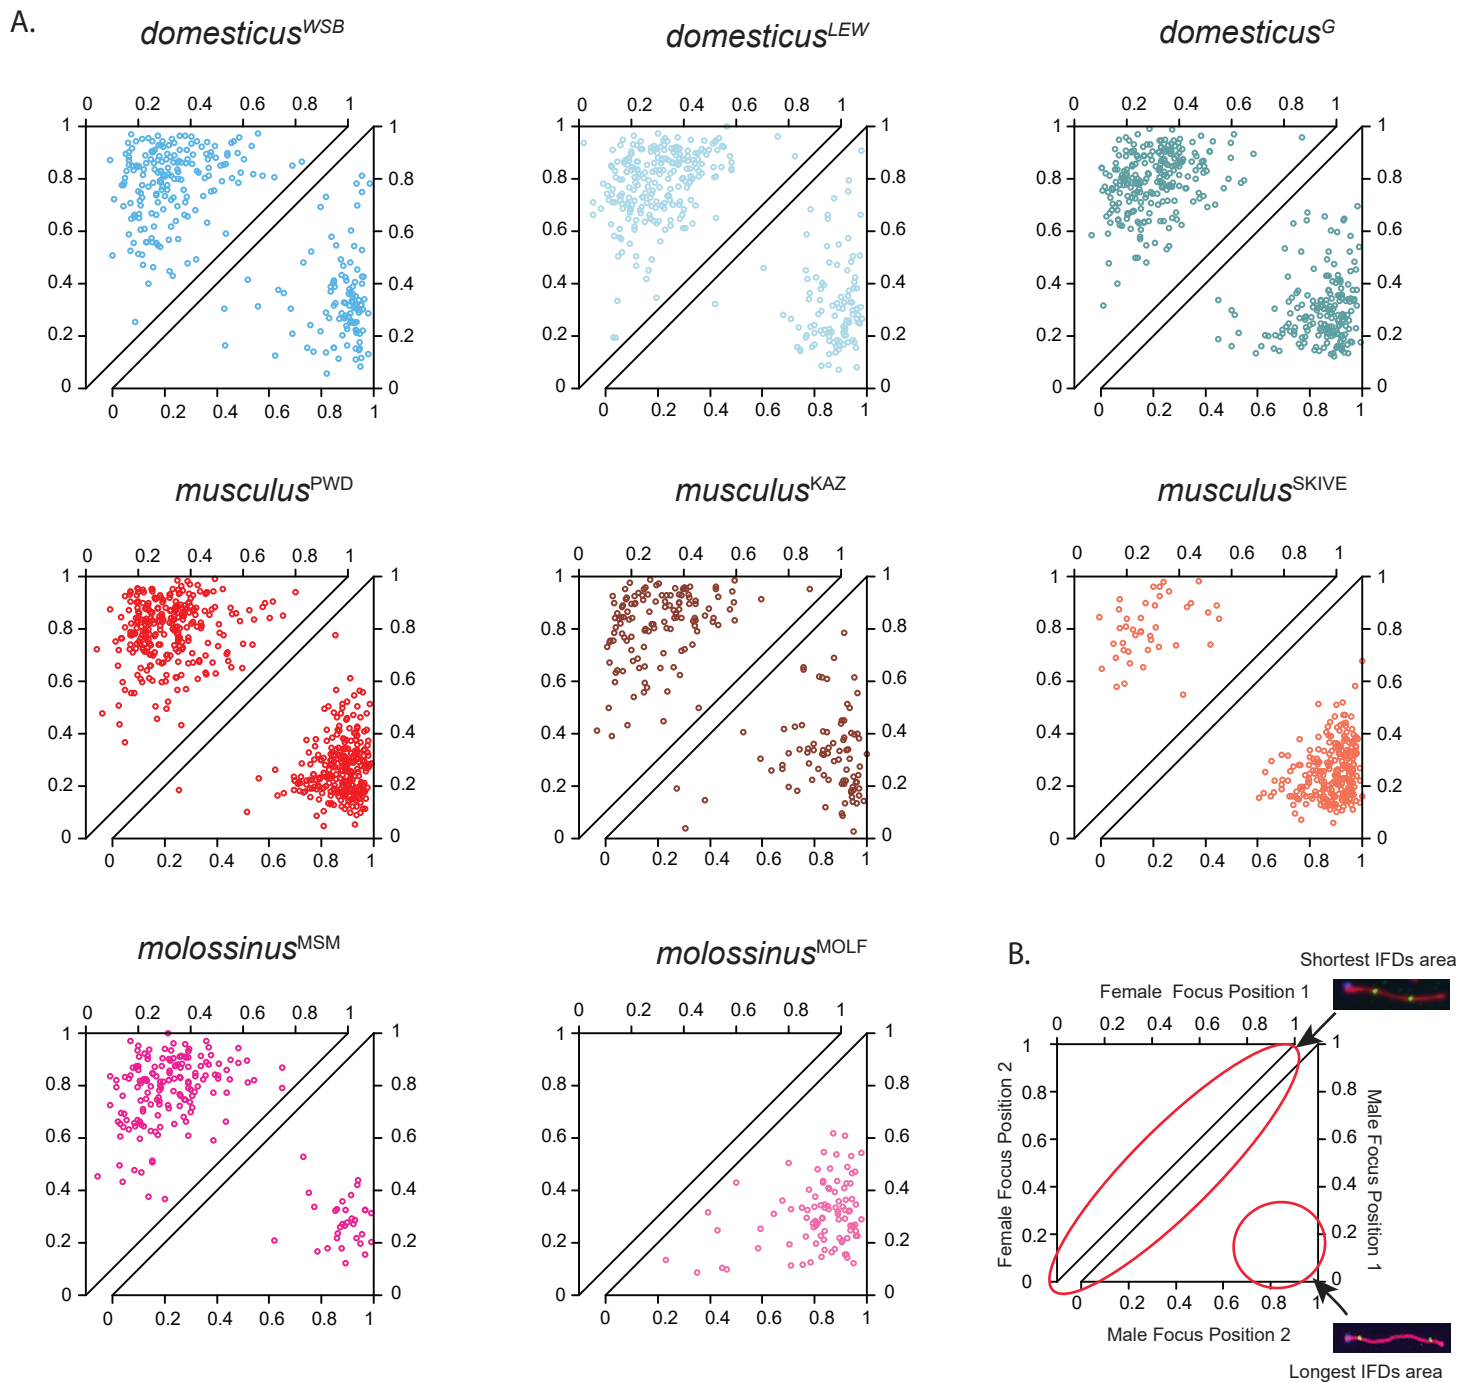

**Supplemental Figure 2. Inter-focal Distances on Bivalents with Two MLH1 Foci.** (A) Inter-focal instances for eight strains of house mice. (B) Schematic illustrating interpretation. Top triangles = females. Bottom triangles = males. Each point shows the positions of both foci ( $x$  and  $y$  axes), normalized by bivalent SC length. Points near the diagonal (space highlighted by the oval) represent short inter-focal distances. Points in the upper left or lower right (space highlighted by the circle) corners represent long inter-focal distances.
